# Supplementary material for: De novo transcriptome analysis of Cnidium monnieri (L.) Cuss and detection of genes related to coumarin biosynthesis
Source: PeerJ. 2020 Nov 6;8:e10157. doi: 10.7717/peerj.10157 (PMC7651471; doi:10.7717/peerj.10157)
Supplement: Supplemental Information 10 [file peerj-08-10157-s010.xlsx]

## Sheet: Sheet1
Gene ID	KEGG	NR	Swissprot	Pfam	KOG
CL1.Contig2_All		PREDICTED: cyclin-dependent kinase inhibitor 4-like [Daucus carota subsp. sativus] >KZM83223.1 hypothetical protein DCAR_030792 [Daucus carota subsp. sativus]	Cyclin-dependent kinase inhibitor 4 OS=Arabidopsis thaliana GN=KRP4 PE=1 SV=2		[T] LSE1270 A Cyclin-dependent kinase inhibitor
CL1.Contig3_All		PREDICTED: cyclin-dependent kinase inhibitor 4-like [Daucus carota subsp. sativus] >KZM83223.1 hypothetical protein DCAR_030792 [Daucus carota subsp. sativus]	Cyclin-dependent kinase inhibitor 4 OS=Arabidopsis thaliana GN=KRP4 PE=1 SV=2	Cyclin-dependent kinase inhibitor	[T] LSE1270 A Cyclin-dependent kinase inhibitor
CL1.Contig4_All		PREDICTED: cyclin-dependent kinase inhibitor 4-like [Daucus carota subsp. sativus] >KZM83223.1 hypothetical protein DCAR_030792 [Daucus carota subsp. sativus]	Cyclin-dependent kinase inhibitor 4 OS=Arabidopsis thaliana GN=KRP4 PE=1 SV=2	Cyclin-dependent kinase inhibitor	[T] LSE1270 A Cyclin-dependent kinase inhibitor
CL10.Contig10_All	K14963//COMPASS component SWD3;K21776//protein lin-54	PREDICTED: transcriptional corepressor LEUNIG_HOMOLOG-like [Daucus carota subsp. sativus]	Transcriptional corepressor LEUNIG_HOMOLOG OS=Arabidopsis thaliana GN=LUH PE=1 SV=1	WD domain, G-beta repeat	[R] KOG0266 WD40 repeat-containing protein
CL10.Contig11_All	K14963//COMPASS component SWD3;K21776//protein lin-54	PREDICTED: transcriptional corepressor LEUNIG_HOMOLOG-like [Daucus carota subsp. sativus]	Transcriptional corepressor LEUNIG_HOMOLOG OS=Arabidopsis thaliana GN=LUH PE=1 SV=1	WD domain, G-beta repeat	[R] KOG0266 WD40 repeat-containing protein
CL10.Contig12_All	K14963//COMPASS component SWD3;K12662//U4/U6 small nuclear ribonucleoprotein PRP4+ko03040//Spliceosome	PREDICTED: transcriptional corepressor LEUNIG_HOMOLOG-like [Daucus carota subsp. sativus]	Transcriptional corepressor LEUNIG_HOMOLOG OS=Arabidopsis thaliana GN=LUH PE=1 SV=1	WD domain, G-beta repeat	[R] KOG0266 WD40 repeat-containing protein
CL10.Contig13_All	K14963//COMPASS component SWD3;K12662//U4/U6 small nuclear ribonucleoprotein PRP4+ko03040//Spliceosome	PREDICTED: transcriptional corepressor LEUNIG_HOMOLOG-like [Daucus carota subsp. sativus]	Transcriptional corepressor LEUNIG_HOMOLOG OS=Arabidopsis thaliana GN=LUH PE=1 SV=1	WD domain, G-beta repeat	[R] KOG0266 WD40 repeat-containing protein
CL10.Contig1_All	K14963//COMPASS component SWD3;K21776//protein lin-54	PREDICTED: transcriptional corepressor LEUNIG_HOMOLOG-like [Daucus carota subsp. sativus]	Transcriptional corepressor LEUNIG_HOMOLOG OS=Arabidopsis thaliana GN=LUH PE=1 SV=1	WD domain, G-beta repeat	[R] KOG0266 WD40 repeat-containing protein
CL10.Contig2_All	K14963//COMPASS component SWD3;K21776//protein lin-54	PREDICTED: transcriptional corepressor LEUNIG_HOMOLOG-like [Daucus carota subsp. sativus]	Transcriptional corepressor LEUNIG_HOMOLOG OS=Arabidopsis thaliana GN=LUH PE=1 SV=1	WD domain, G-beta repeat	[R] KOG0266 WD40 repeat-containing protein
CL10.Contig3_All	K14963//COMPASS component SWD3;K21776//protein lin-54	PREDICTED: transcriptional corepressor LEUNIG_HOMOLOG-like [Daucus carota subsp. sativus]	Transcriptional corepressor LEUNIG_HOMOLOG OS=Arabidopsis thaliana GN=LUH PE=1 SV=1	WD domain, G-beta repeat	[R] KOG0266 WD40 repeat-containing protein
CL10.Contig4_All	K14963//COMPASS component SWD3;K21776//protein lin-54	PREDICTED: transcriptional corepressor LEUNIG_HOMOLOG isoform X2 [Daucus carota subsp. sativus]	Transcriptional corepressor LEUNIG_HOMOLOG OS=Arabidopsis thaliana GN=LUH PE=1 SV=1	WD domain, G-beta repeat	[R] KOG0266 WD40 repeat-containing protein
CL10.Contig5_All	K14963//COMPASS component SWD3;K21776//protein lin-54	PREDICTED: transcriptional corepressor LEUNIG_HOMOLOG-like [Daucus carota subsp. sativus]	Transcriptional corepressor LEUNIG_HOMOLOG OS=Arabidopsis thaliana GN=LUH PE=1 SV=1	WD domain, G-beta repeat	[R] KOG0266 WD40 repeat-containing protein
CL10.Contig6_All	K14963//COMPASS component SWD3;K21776//protein lin-54	PREDICTED: transcriptional corepressor LEUNIG_HOMOLOG-like [Daucus carota subsp. sativus]	Transcriptional corepressor LEUNIG_HOMOLOG OS=Arabidopsis thaliana GN=LUH PE=1 SV=1	WD domain, G-beta repeat	[R] KOG0266 WD40 repeat-containing protein
CL10.Contig7_All	K14963//COMPASS component SWD3;K12662//U4/U6 small nuclear ribonucleoprotein PRP4+ko03040//Spliceosome	PREDICTED: transcriptional corepressor LEUNIG_HOMOLOG-like [Daucus carota subsp. sativus]	Transcriptional corepressor LEUNIG_HOMOLOG OS=Arabidopsis thaliana GN=LUH PE=1 SV=1	WD domain, G-beta repeat	[R] KOG0266 WD40 repeat-containing protein
CL10.Contig8_All	K14963//COMPASS component SWD3;K21776//protein lin-54	PREDICTED: transcriptional corepressor LEUNIG_HOMOLOG-like [Daucus carota subsp. sativus]	Transcriptional corepressor LEUNIG_HOMOLOG OS=Arabidopsis thaliana GN=LUH PE=1 SV=1	WD domain, G-beta repeat	[R] KOG0266 WD40 repeat-containing protein
CL10.Contig9_All	K14963//COMPASS component SWD3;K12662//U4/U6 small nuclear ribonucleoprotein PRP4+ko03040//Spliceosome	PREDICTED: transcriptional corepressor LEUNIG_HOMOLOG isoform X1 [Daucus carota subsp. sativus]	Transcriptional corepressor LEUNIG_HOMOLOG OS=Arabidopsis thaliana GN=LUH PE=1 SV=1	WD domain, G-beta repeat	[R] KOG0266 WD40 repeat-containing protein
CL100.Contig1_All		PREDICTED: uncharacterized protein LOC108224497 [Daucus carota subsp. sativus] >XP_017254629.1 PREDICTED: uncharacterized protein LOC108224497 [Daucus carota subsp. sativus]
CL100.Contig2_All		PREDICTED: uncharacterized protein LOC108224497 [Daucus carota subsp. sativus] >XP_017254629.1 PREDICTED: uncharacterized protein LOC108224497 [Daucus carota subsp. sativus]		Protein of unknown function (DUF4050)
CL100.Contig3_All		PREDICTED: uncharacterized protein LOC108224497 [Daucus carota subsp. sativus] >XP_017254629.1 PREDICTED: uncharacterized protein LOC108224497 [Daucus carota subsp. sativus]		Protein of unknown function (DUF4050)
CL100.Contig4_All		PREDICTED: uncharacterized protein LOC108224497 [Daucus carota subsp. sativus] >XP_017254629.1 PREDICTED: uncharacterized protein LOC108224497 [Daucus carota subsp. sativus]
CL1000.Contig1_All	K21989//calcium permeable stress-gated cation channel	PREDICTED: CSC1-like protein At1g32090 [Daucus carota subsp. sativus]	CSC1-like protein At1g32090 OS=Arabidopsis thaliana GN=At1g32090 PE=1 SV=1	Calcium-dependent channel, 7TM region, putative phosphate	[R] KOG1134 Uncharacterized conserved protein
CL1000.Contig2_All	K21989//calcium permeable stress-gated cation channel	PREDICTED: CSC1-like protein At1g32090 [Daucus carota subsp. sativus]	CSC1-like protein At1g32090 OS=Arabidopsis thaliana GN=At1g32090 PE=1 SV=1	Calcium-dependent channel, 7TM region, putative phosphate	[R] KOG1134 Uncharacterized conserved protein
CL10000.Contig1_All	K20043//clathrin coat assembly protein AP180;K09326//homeobox protein OTX1;K04733//interleukin-1 receptor-associated kinase 4 [EC:2.7.11.1];K16222//Dof zinc finger protein DOF5.5+ko04712//Circadian rhythm - plant	PREDICTED: dof zinc finger protein DOF5.6 [Daucus carota subsp. sativus] >KZM89062.1 hypothetical protein DCAR_026137 [Daucus carota subsp. sativus]	Dof zinc finger protein DOF5.3 OS=Arabidopsis thaliana GN=DOF5.3 PE=2 SV=1	Dof domain, zinc finger	[R] LSE0455 A Dof Zn-finger protein
CL10000.Contig2_All	K20043//clathrin coat assembly protein AP180;K09326//homeobox protein OTX1;K04733//interleukin-1 receptor-associated kinase 4 [EC:2.7.11.1];K16222//Dof zinc finger protein DOF5.5+ko04712//Circadian rhythm - plant	PREDICTED: dof zinc finger protein DOF5.6 [Daucus carota subsp. sativus] >KZM89062.1 hypothetical protein DCAR_026137 [Daucus carota subsp. sativus]	Dof zinc finger protein DOF1.8 OS=Arabidopsis thaliana GN=DOF1.8 PE=2 SV=1	Dof domain, zinc finger	[R] LSE0455 A Dof Zn-finger protein
CL10001.Contig1_All	K21626//cyclin-D1-binding protein 1	PREDICTED: uncharacterized protein LOC108196374 isoform X1 [Daucus carota subsp. sativus]		Grap2 and cyclin-D-interacting
CL10001.Contig2_All	K21626//cyclin-D1-binding protein 1	PREDICTED: uncharacterized protein LOC108196374 isoform X1 [Daucus carota subsp. sativus]		Grap2 and cyclin-D-interacting
CL10001.Contig3_All	K21626//cyclin-D1-binding protein 1	PREDICTED: uncharacterized protein LOC108196374 isoform X1 [Daucus carota subsp. sativus]		Grap2 and cyclin-D-interacting
CL10001.Contig4_All	K21626//cyclin-D1-binding protein 1	PREDICTED: uncharacterized protein LOC108196374 isoform X1 [Daucus carota subsp. sativus]
CL10003.Contig1_All		PREDICTED: early nodulin-93-like [Daucus carota subsp. sativus] >KZN11804.1 hypothetical protein DCAR_004460 [Daucus carota subsp. sativus]	Early nodulin-93 OS=Glycine max PE=2 SV=1	Early nodulin 93 ENOD93 protein
CL10003.Contig2_All		PREDICTED: early nodulin-93-like [Daucus carota subsp. sativus] >KZN11804.1 hypothetical protein DCAR_004460 [Daucus carota subsp. sativus]	Early nodulin-93 OS=Glycine max PE=2 SV=1	Early nodulin 93 ENOD93 protein
CL10004.Contig1_All	K15285//solute carrier family 35, member E3	hypothetical protein DCAR_004799 [Daucus carota subsp. sativus]	UDP-xylose transporter 3 OS=Arabidopsis thaliana GN=UXT3 PE=1 SV=1	Triose-phosphate Transporter family	[GE] KOG1441 Glucose-6-phosphate/phosphate and phosphoenolpyruvate/phosphate antiporter
CL10004.Contig2_All	K15285//solute carrier family 35, member E3	hypothetical protein DCAR_004799 [Daucus carota subsp. sativus]	UDP-xylose transporter 3 OS=Arabidopsis thaliana GN=UXT3 PE=1 SV=1	Triose-phosphate Transporter family	[GE] KOG1441 Glucose-6-phosphate/phosphate and phosphoenolpyruvate/phosphate antiporter
CL10004.Contig3_All	K15285//solute carrier family 35, member E3	hypothetical protein DCAR_004799 [Daucus carota subsp. sativus]	UDP-xylose transporter 3 OS=Arabidopsis thaliana GN=UXT3 PE=1 SV=1		[GE] KOG1441 Glucose-6-phosphate/phosphate and phosphoenolpyruvate/phosphate antiporter
CL10005.Contig1_All
CL10005.Contig2_All
CL10006.Contig1_All		PREDICTED: RRP15-like protein [Daucus carota subsp. sativus] >KZM91552.1 hypothetical protein DCAR_021083 [Daucus carota subsp. sativus]		Rrp15p	[S] KOG2974 Uncharacterized conserved protein
CL10006.Contig2_All		PREDICTED: RRP15-like protein [Daucus carota subsp. sativus] >KZM91552.1 hypothetical protein DCAR_021083 [Daucus carota subsp. sativus]		Rrp15p	[S] KOG2974 Uncharacterized conserved protein
CL10006.Contig3_All		PREDICTED: RRP15-like protein [Daucus carota subsp. sativus] >KZM91552.1 hypothetical protein DCAR_021083 [Daucus carota subsp. sativus]		Rrp15p	[S] KOG2974 Uncharacterized conserved protein
CL10006.Contig4_All		PREDICTED: RRP15-like protein [Daucus carota subsp. sativus] >KZM91552.1 hypothetical protein DCAR_021083 [Daucus carota subsp. sativus]		Rrp15p	[S] KOG2974 Uncharacterized conserved protein
CL10006.Contig5_All		PREDICTED: RRP15-like protein [Daucus carota subsp. sativus] >KZM91552.1 hypothetical protein DCAR_021083 [Daucus carota subsp. sativus]		Rrp15p	[S] KOG2974 Uncharacterized conserved protein
CL10008.Contig2_All	K01623//fructose-bisphosphate aldolase, class I [EC:4.1.2.13]+ko00010//Glycolysis / Gluconeogenesis+ko00030//Pentose phosphate pathway+ko01230//Biosynthesis of amino acids+ko01100//Metabolic pathways+ko00051//Fructose and mannose metabolism+ko01110//Biosynthesis of secondary metabolites+ko00710//Carbon fixation in photosynthetic organisms+ko01200//Carbon metabolism	fructose-bisphosphate aldolase 3 [Camellia oleifera]	Fructose-bisphosphate aldolase, chloroplastic OS=Oryza sativa subsp. japonica GN=ALDP PE=1 SV=2		[G] KOG1557 Fructose-biphosphate aldolase
CL10008.Contig4_All
CL1001.Contig10_All	K20779//E3 ubiquitin-protein ligase RNF168 [EC:2.3.2.31]	PREDICTED: LON peptidase N-terminal domain and RING finger protein 1 [Daucus carota subsp. sativus] >KZM88961.1 hypothetical protein DCAR_026036 [Daucus carota subsp. sativus]	Peroxisome biogenesis factor 10 OS=Arabidopsis thaliana GN=PEX10 PE=1 SV=1	Zinc finger, C3HC4 type (RING finger)	[O] KOG4159 Predicted E3 ubiquitin ligase
CL1001.Contig11_All	K20779//E3 ubiquitin-protein ligase RNF168 [EC:2.3.2.31]	PREDICTED: LON peptidase N-terminal domain and RING finger protein 1 [Daucus carota subsp. sativus] >KZM88961.1 hypothetical protein DCAR_026036 [Daucus carota subsp. sativus]	Peroxisome biogenesis factor 10 OS=Arabidopsis thaliana GN=PEX10 PE=1 SV=1	ATP-dependent protease La (LON) substrate-binding domain	[O] KOG4159 Predicted E3 ubiquitin ligase
CL1001.Contig12_All	K20779//E3 ubiquitin-protein ligase RNF168 [EC:2.3.2.31]	PREDICTED: LON peptidase N-terminal domain and RING finger protein 1 [Daucus carota subsp. sativus] >KZM88961.1 hypothetical protein DCAR_026036 [Daucus carota subsp. sativus]	Peroxisome biogenesis factor 10 OS=Arabidopsis thaliana GN=PEX10 PE=1 SV=1	Zinc finger, C3HC4 type (RING finger)	[O] KOG4159 Predicted E3 ubiquitin ligase
CL1001.Contig1_All	K20779//E3 ubiquitin-protein ligase RNF168 [EC:2.3.2.31]	PREDICTED: LON peptidase N-terminal domain and RING finger protein 1 [Daucus carota subsp. sativus] >KZM88961.1 hypothetical protein DCAR_026036 [Daucus carota subsp. sativus]	Peroxisome biogenesis factor 10 OS=Arabidopsis thaliana GN=PEX10 PE=1 SV=1	ATP-dependent protease La (LON) substrate-binding domain	[O] KOG4159 Predicted E3 ubiquitin ligase
CL1001.Contig2_All	K20779//E3 ubiquitin-protein ligase RNF168 [EC:2.3.2.31]	PREDICTED: LON peptidase N-terminal domain and RING finger protein 1 [Daucus carota subsp. sativus] >KZM88961.1 hypothetical protein DCAR_026036 [Daucus carota subsp. sativus]	Peroxisome biogenesis factor 10 OS=Arabidopsis thaliana GN=PEX10 PE=1 SV=1	ATP-dependent protease La (LON) substrate-binding domain	[O] KOG4159 Predicted E3 ubiquitin ligase
CL1001.Contig3_All	K20779//E3 ubiquitin-protein ligase RNF168 [EC:2.3.2.31]	PREDICTED: LON peptidase N-terminal domain and RING finger protein 1 [Daucus carota subsp. sativus] >KZM88961.1 hypothetical protein DCAR_026036 [Daucus carota subsp. sativus]	Peroxisome biogenesis factor 10 OS=Arabidopsis thaliana GN=PEX10 PE=1 SV=1	ATP-dependent protease La (LON) substrate-binding domain	[O] KOG4159 Predicted E3 ubiquitin ligase
CL1001.Contig4_All		PREDICTED: LON peptidase N-terminal domain and RING finger protein 1 [Daucus carota subsp. sativus] >KZM88961.1 hypothetical protein DCAR_026036 [Daucus carota subsp. sativus]			[O] KOG4159 Predicted E3 ubiquitin ligase
CL1001.Contig5_All	K09553//stress-induced-phosphoprotein 1;K20779//E3 ubiquitin-protein ligase RNF168 [EC:2.3.2.31]	PREDICTED: LON peptidase N-terminal domain and RING finger protein 1 [Daucus carota subsp. sativus] >KZM88961.1 hypothetical protein DCAR_026036 [Daucus carota subsp. sativus]		Tetratricopeptide repeat	[O] KOG4159 Predicted E3 ubiquitin ligase
CL1001.Contig6_All	K20779//E3 ubiquitin-protein ligase RNF168 [EC:2.3.2.31]	PREDICTED: LON peptidase N-terminal domain and RING finger protein 1 [Daucus carota subsp. sativus] >KZM88961.1 hypothetical protein DCAR_026036 [Daucus carota subsp. sativus]	Peroxisome biogenesis factor 10 OS=Arabidopsis thaliana GN=PEX10 PE=1 SV=1	Zinc finger, C3HC4 type (RING finger)	[O] KOG4159 Predicted E3 ubiquitin ligase
CL1001.Contig7_All	K20779//E3 ubiquitin-protein ligase RNF168 [EC:2.3.2.31]	PREDICTED: LON peptidase N-terminal domain and RING finger protein 1 [Daucus carota subsp. sativus] >KZM88961.1 hypothetical protein DCAR_026036 [Daucus carota subsp. sativus]	Peroxisome biogenesis factor 10 OS=Arabidopsis thaliana GN=PEX10 PE=1 SV=1	ATP-dependent protease La (LON) substrate-binding domain	[O] KOG4159 Predicted E3 ubiquitin ligase
CL1001.Contig8_All		PREDICTED: LON peptidase N-terminal domain and RING finger protein 1 [Daucus carota subsp. sativus] >KZM88961.1 hypothetical protein DCAR_026036 [Daucus carota subsp. sativus]
CL1001.Contig9_All		PREDICTED: LON peptidase N-terminal domain and RING finger protein 1 [Daucus carota subsp. sativus] >KZM88961.1 hypothetical protein DCAR_026036 [Daucus carota subsp. sativus]			[O] KOG4159 Predicted E3 ubiquitin ligase
CL10010.Contig1_All	K00549//5-methyltetrahydropteroyltriglutamate--homocysteine methyltransferase [EC:2.1.1.14]+ko01230//Biosynthesis of amino acids+ko00450//Selenocompound metabolism+ko01100//Metabolic pathways+ko01110//Biosynthesis of secondary metabolites+ko00270//Cysteine and methionine metabolism	PREDICTED: LOW QUALITY PROTEIN: double-stranded RNA-binding protein 2 [Daucus carota subsp. sativus]	Double-stranded RNA-binding protein 2 OS=Arabidopsis thaliana GN=DRB2 PE=1 SV=1	Double-stranded RNA binding motif
CL10010.Contig2_All	K00549//5-methyltetrahydropteroyltriglutamate--homocysteine methyltransferase [EC:2.1.1.14]+ko01230//Biosynthesis of amino acids+ko00450//Selenocompound metabolism+ko01100//Metabolic pathways+ko01110//Biosynthesis of secondary metabolites+ko00270//Cysteine and methionine metabolism	PREDICTED: LOW QUALITY PROTEIN: double-stranded RNA-binding protein 2 [Daucus carota subsp. sativus]	Double-stranded RNA-binding protein 2 OS=Arabidopsis thaliana GN=DRB2 PE=1 SV=1	Double-stranded RNA binding motif
CL10011.Contig1_All	K14497//protein phosphatase 2C [EC:3.1.3.16]+ko04016//MAPK signaling pathway - plant+ko04075//Plant hormone signal transduction	PREDICTED: probable protein phosphatase 2C 24 [Daucus carota subsp. sativus] >KZN06590.1 hypothetical protein DCAR_007427 [Daucus carota subsp. sativus]	Protein phosphatase 2C 3 OS=Arabidopsis thaliana GN=AIP1 PE=1 SV=1	Protein phosphatase 2C	[T] KOG0698 Serine/threonine protein phosphatase
CL10011.Contig2_All	K14497//protein phosphatase 2C [EC:3.1.3.16]+ko04016//MAPK signaling pathway - plant+ko04075//Plant hormone signal transduction	PREDICTED: probable protein phosphatase 2C 24 [Daucus carota subsp. sativus] >KZN06590.1 hypothetical protein DCAR_007427 [Daucus carota subsp. sativus]	Protein phosphatase 2C 37 OS=Arabidopsis thaliana GN=PP2CA PE=1 SV=1	Protein phosphatase 2C	[T] KOG0698 Serine/threonine protein phosphatase
CL10011.Contig3_All	K14497//protein phosphatase 2C [EC:3.1.3.16]+ko04016//MAPK signaling pathway - plant+ko04075//Plant hormone signal transduction	PREDICTED: probable protein phosphatase 2C 24 [Daucus carota subsp. sativus] >KZN06590.1 hypothetical protein DCAR_007427 [Daucus carota subsp. sativus]	Protein phosphatase 2C 37 OS=Arabidopsis thaliana GN=PP2CA PE=1 SV=1	Protein phosphatase 2C	[T] KOG0698 Serine/threonine protein phosphatase
CL10011.Contig4_All	K14497//protein phosphatase 2C [EC:3.1.3.16]+ko04016//MAPK signaling pathway - plant+ko04075//Plant hormone signal transduction	PREDICTED: probable protein phosphatase 2C 24 [Daucus carota subsp. sativus] >KZN06590.1 hypothetical protein DCAR_007427 [Daucus carota subsp. sativus]	Protein phosphatase 2C 3 OS=Arabidopsis thaliana GN=AIP1 PE=1 SV=1	Protein phosphatase 2C	[T] KOG0698 Serine/threonine protein phosphatase
CL10012.Contig1_All	K03327//multidrug resistance protein, MATE family	PREDICTED: protein DETOXIFICATION 49-like [Daucus carota subsp. sativus] >KZM98038.1 hypothetical protein DCAR_014600 [Daucus carota subsp. sativus]	Protein DETOXIFICATION 49 OS=Arabidopsis thaliana GN=DTX49 PE=2 SV=1	MatE	[R] KOG1347 Uncharacterized membrane protein, predicted efflux pump
CL10012.Contig2_All	K03327//multidrug resistance protein, MATE family	protein DETOXIFICATION 49-like [Manihot esculenta] >OAY59875.1 hypothetical protein MANES_01G067000 [Manihot esculenta]	Protein DETOXIFICATION 49 OS=Arabidopsis thaliana GN=DTX49 PE=2 SV=1	MatE	[R] KOG1347 Uncharacterized membrane protein, predicted efflux pump
CL10014.Contig1_All	K22376//E3 ubiquitin-protein ligase KCMF1 [EC:2.3.2.27]	PREDICTED: protein DEHYDRATION-INDUCED 19 homolog 5-like [Daucus carota subsp. sativus] >KZM89100.1 hypothetical protein DCAR_026175 [Daucus carota subsp. sativus]	Protein DEHYDRATION-INDUCED 19 homolog 6 OS=Oryza sativa subsp. japonica GN=DI19-6 PE=2 SV=1	Stress-induced protein Di19, C-terminal
CL10014.Contig2_All	K22376//E3 ubiquitin-protein ligase KCMF1 [EC:2.3.2.27]	PREDICTED: protein DEHYDRATION-INDUCED 19 homolog 5-like [Daucus carota subsp. sativus] >KZM89100.1 hypothetical protein DCAR_026175 [Daucus carota subsp. sativus]	Protein DEHYDRATION-INDUCED 19 homolog 5 OS=Oryza sativa subsp. japonica GN=DI19-5 PE=2 SV=1
CL10014.Contig3_All	K22376//E3 ubiquitin-protein ligase KCMF1 [EC:2.3.2.27]	PREDICTED: protein DEHYDRATION-INDUCED 19 homolog 5-like [Daucus carota subsp. sativus] >KZM89100.1 hypothetical protein DCAR_026175 [Daucus carota subsp. sativus]	Protein DEHYDRATION-INDUCED 19 homolog 5 OS=Oryza sativa subsp. japonica GN=DI19-5 PE=2 SV=1	Stress-induced protein Di19, C-terminal
CL10014.Contig4_All	K22376//E3 ubiquitin-protein ligase KCMF1 [EC:2.3.2.27]	PREDICTED: protein DEHYDRATION-INDUCED 19 homolog 5-like [Daucus carota subsp. sativus] >KZM89100.1 hypothetical protein DCAR_026175 [Daucus carota subsp. sativus]	Protein DEHYDRATION-INDUCED 19 homolog 5 OS=Oryza sativa subsp. japonica GN=DI19-5 PE=2 SV=1	Stress-induced protein Di19, C-terminal
CL10014.Contig5_All	K22376//E3 ubiquitin-protein ligase KCMF1 [EC:2.3.2.27];K15697//RING finger protein 114 [EC:2.3.2.27]	PREDICTED: protein DEHYDRATION-INDUCED 19 homolog 5-like [Daucus carota subsp. sativus] >KZM89100.1 hypothetical protein DCAR_026175 [Daucus carota subsp. sativus]	Protein DEHYDRATION-INDUCED 19 OS=Oryza sativa subsp. japonica GN=DI19-1 PE=2 SV=1	Stress-induced protein Di19, C-terminal
CL10014.Contig6_All	K22376//E3 ubiquitin-protein ligase KCMF1 [EC:2.3.2.27];K15697//RING finger protein 114 [EC:2.3.2.27]	PREDICTED: protein DEHYDRATION-INDUCED 19 homolog 5-like [Daucus carota subsp. sativus] >KZM89100.1 hypothetical protein DCAR_026175 [Daucus carota subsp. sativus]	Protein DEHYDRATION-INDUCED 19 homolog 6 OS=Oryza sativa subsp. japonica GN=DI19-6 PE=2 SV=1	Drought induced 19 protein (Di19), zinc-binding	[V] LSE0447 A Drought-induced protein
CL10014.Contig7_All	K22376//E3 ubiquitin-protein ligase KCMF1 [EC:2.3.2.27]	PREDICTED: protein DEHYDRATION-INDUCED 19 homolog 5-like [Daucus carota subsp. sativus] >KZM89100.1 hypothetical protein DCAR_026175 [Daucus carota subsp. sativus]	Protein DEHYDRATION-INDUCED 19 homolog 6 OS=Oryza sativa subsp. japonica GN=DI19-6 PE=2 SV=1	Drought induced 19 protein (Di19), zinc-binding	[V] LSE0447 A Drought-induced protein
CL10014.Contig8_All	K22376//E3 ubiquitin-protein ligase KCMF1 [EC:2.3.2.27]	PREDICTED: protein DEHYDRATION-INDUCED 19 homolog 5-like [Daucus carota subsp. sativus] >KZM89100.1 hypothetical protein DCAR_026175 [Daucus carota subsp. sativus]	Protein DEHYDRATION-INDUCED 19 OS=Oryza sativa subsp. japonica GN=DI19-1 PE=2 SV=1	Stress-induced protein Di19, C-terminal
CL10015.Contig1_All		PREDICTED: uncharacterized protein LOC108220677 [Daucus carota subsp. sativus]			[R] KOG0017 FOG: Transposon-encoded proteins with TYA, reverse transcriptase, integrase domains in various combinations
CL10015.Contig2_All		PREDICTED: uncharacterized protein LOC108220677 [Daucus carota subsp. sativus]			[R] KOG0017 FOG: Transposon-encoded proteins with TYA, reverse transcriptase, integrase domains in various combinations
CL10018.Contig1_All	K03294//basic amino acid/polyamine antiporter, APA family	PREDICTED: cationic amino acid transporter 1-like [Daucus carota subsp. sativus] >XP_017230515.1 PREDICTED: cationic amino acid transporter 1-like [Daucus carota subsp. sativus] >XP_017230516.1 PREDICTED: cationic amino acid transporter 1-like [Daucus carota subsp. sativus]	Cationic amino acid transporter 1 OS=Arabidopsis thaliana GN=CAT1 PE=1 SV=1	Amino acid permease	[E] KOG1286 Amino acid transporters
CL10018.Contig2_All	K03294//basic amino acid/polyamine antiporter, APA family	PREDICTED: cationic amino acid transporter 1-like [Daucus carota subsp. sativus] >XP_017230515.1 PREDICTED: cationic amino acid transporter 1-like [Daucus carota subsp. sativus] >XP_017230516.1 PREDICTED: cationic amino acid transporter 1-like [Daucus carota subsp. sativus]	Cationic amino acid transporter 1 OS=Arabidopsis thaliana GN=CAT1 PE=1 SV=1	Amino acid permease	[E] KOG1286 Amino acid transporters
CL10018.Contig3_All	K03294//basic amino acid/polyamine antiporter, APA family	PREDICTED: cationic amino acid transporter 1-like [Daucus carota subsp. sativus] >XP_017230515.1 PREDICTED: cationic amino acid transporter 1-like [Daucus carota subsp. sativus] >XP_017230516.1 PREDICTED: cationic amino acid transporter 1-like [Daucus carota subsp. sativus]	Cationic amino acid transporter 1 OS=Arabidopsis thaliana GN=CAT1 PE=1 SV=1	Amino acid permease	[E] KOG1286 Amino acid transporters
CL10019.Contig1_All	K07897//Ras-related protein Rab-7A+ko04144//Endocytosis+ko04145//Phagosome	hypothetical protein DCAR_026330 [Daucus carota subsp. sativus]	Sulfite exporter TauE/SafE family protein 3 OS=Arabidopsis thaliana GN=At2g25737 PE=2 SV=1	Sulfite exporter TauE/SafE
CL10019.Contig2_All	K07897//Ras-related protein Rab-7A+ko04144//Endocytosis+ko04145//Phagosome;K11996//adenylyltransferase and sulfurtransferase [EC:2.7.7.80 2.8.1.11]+ko04122//Sulfur relay system	PREDICTED: uncharacterized protein LOC108193441 isoform X1 [Daucus carota subsp. sativus] >XP_017215584.1 PREDICTED: uncharacterized protein LOC108193441 isoform X1 [Daucus carota subsp. sativus] >XP_017215585.1 PREDICTED: uncharacterized protein LOC108193441 isoform X1 [Daucus carota subsp. sativus]	Sulfite exporter TauE/SafE family protein 3 OS=Arabidopsis thaliana GN=At2g25737 PE=2 SV=1	Sulfite exporter TauE/SafE
CL10019.Contig3_All	K07897//Ras-related protein Rab-7A+ko04144//Endocytosis+ko04145//Phagosome;K11996//adenylyltransferase and sulfurtransferase [EC:2.7.7.80 2.8.1.11]+ko04122//Sulfur relay system	PREDICTED: uncharacterized protein LOC108193441 isoform X2 [Daucus carota subsp. sativus]	Sulfite exporter TauE/SafE family protein 3 OS=Arabidopsis thaliana GN=At2g25737 PE=2 SV=1	Sulfite exporter TauE/SafE
CL10019.Contig4_All	K07897//Ras-related protein Rab-7A+ko04144//Endocytosis+ko04145//Phagosome	PREDICTED: uncharacterized protein LOC108193441 isoform X2 [Daucus carota subsp. sativus]	Sulfite exporter TauE/SafE family protein 3 OS=Arabidopsis thaliana GN=At2g25737 PE=2 SV=1	Sulfite exporter TauE/SafE
CL1002.Contig1_All		PREDICTED: uncharacterized protein LOC108213234 isoform X1 [Daucus carota subsp. sativus] >KZN09003.1 hypothetical protein DCAR_001659 [Daucus carota subsp. sativus]
CL1002.Contig2_All		PREDICTED: uncharacterized protein LOC108213234 isoform X1 [Daucus carota subsp. sativus] >KZN09003.1 hypothetical protein DCAR_001659 [Daucus carota subsp. sativus]
CL1002.Contig3_All		PREDICTED: uncharacterized protein LOC108213234 isoform X1 [Daucus carota subsp. sativus] >KZN09003.1 hypothetical protein DCAR_001659 [Daucus carota subsp. sativus]
CL10020.Contig1_All	K13728//mitotic spindle assembly checkpoint protein MAD2B	PREDICTED: DNA polymerase zeta processivity subunit isoform X1 [Daucus carota subsp. sativus]	DNA polymerase zeta processivity subunit OS=Arabidopsis thaliana GN=REV7 PE=2 SV=1		[D] KOG3186 Mitotic spindle checkpoint protein
CL10020.Contig2_All	K13728//mitotic spindle assembly checkpoint protein MAD2B	PREDICTED: DNA polymerase zeta processivity subunit isoform X2 [Daucus carota subsp. sativus]	DNA polymerase zeta processivity subunit OS=Arabidopsis thaliana GN=REV7 PE=2 SV=1	HORMA domain	[D] KOG3186 Mitotic spindle checkpoint protein
CL10020.Contig3_All	K13728//mitotic spindle assembly checkpoint protein MAD2B	PREDICTED: DNA polymerase zeta processivity subunit isoform X2 [Daucus carota subsp. sativus]	DNA polymerase zeta processivity subunit OS=Arabidopsis thaliana GN=REV7 PE=2 SV=1	HORMA domain	[D] KOG3186 Mitotic spindle checkpoint protein
CL10021.Contig1_All		PREDICTED: uncharacterized protein LOC108216738 [Daucus carota subsp. sativus] >KZM96816.1 hypothetical protein DCAR_015822 [Daucus carota subsp. sativus]			[G] KOG3734 Predicted phosphoglycerate mutase
CL10021.Contig2_All		PREDICTED: uncharacterized protein LOC108216738 [Daucus carota subsp. sativus] >KZM96816.1 hypothetical protein DCAR_015822 [Daucus carota subsp. sativus]			[G] KOG3734 Predicted phosphoglycerate mutase
CL10021.Contig3_All		PREDICTED: uncharacterized protein LOC108216738 [Daucus carota subsp. sativus] >KZM96816.1 hypothetical protein DCAR_015822 [Daucus carota subsp. sativus]
CL10022.Contig1_All	K12825//splicing factor 3A subunit 1+ko03040//Spliceosome	PREDICTED: probable splicing factor 3A subunit 1 [Daucus carota subsp. sativus] >XP_017227620.1 PREDICTED: probable splicing factor 3A subunit 1 [Daucus carota subsp. sativus]	Probable splicing factor 3A subunit 1 OS=Arabidopsis thaliana GN=At1g14650 PE=1 SV=2	Pre-mRNA splicing factor PRP21 like protein	[A] KOG0007 Splicing factor 3a, subunit 1
CL10022.Contig2_All	K12825//splicing factor 3A subunit 1+ko03040//Spliceosome	PREDICTED: probable splicing factor 3A subunit 1 [Daucus carota subsp. sativus] >XP_017227620.1 PREDICTED: probable splicing factor 3A subunit 1 [Daucus carota subsp. sativus]	Probable splicing factor 3A subunit 1 OS=Arabidopsis thaliana GN=At1g14650 PE=1 SV=2	Pre-mRNA splicing factor PRP21 like protein	[A] KOG0007 Splicing factor 3a, subunit 1
CL10022.Contig3_All	K12825//splicing factor 3A subunit 1+ko03040//Spliceosome	PREDICTED: probable splicing factor 3A subunit 1 [Daucus carota subsp. sativus] >XP_017227620.1 PREDICTED: probable splicing factor 3A subunit 1 [Daucus carota subsp. sativus]	Probable splicing factor 3A subunit 1 OS=Arabidopsis thaliana GN=At1g14650 PE=1 SV=2	Pre-mRNA splicing factor PRP21 like protein	[A] KOG0007 Splicing factor 3a, subunit 1
CL10023.Contig1_All	K02266//cytochrome c oxidase subunit 6a+ko01100//Metabolic pathways+ko00190//Oxidative phosphorylation	PREDICTED: cytochrome c oxidase subunit 6a, mitochondrial [Daucus carota subsp. sativus]	Cytochrome c oxidase subunit 6a, mitochondrial OS=Arabidopsis thaliana GN=COX6A PE=3 SV=1		[C] KOG3469 Cytochrome c oxidase, subunit VIa/COX13
CL10023.Contig2_All	K02266//cytochrome c oxidase subunit 6a+ko01100//Metabolic pathways+ko00190//Oxidative phosphorylation	PREDICTED: cytochrome c oxidase subunit 6a, mitochondrial [Daucus carota subsp. sativus]	Cytochrome c oxidase subunit 6a, mitochondrial OS=Arabidopsis thaliana GN=COX6A PE=3 SV=1	Cytochrome c oxidase subunit VIa	[C] KOG3469 Cytochrome c oxidase, subunit VIa/COX13
CL10023.Contig3_All	K02266//cytochrome c oxidase subunit 6a+ko01100//Metabolic pathways+ko00190//Oxidative phosphorylation	PREDICTED: cytochrome c oxidase subunit 6a, mitochondrial [Daucus carota subsp. sativus]	Cytochrome c oxidase subunit 6a, mitochondrial OS=Arabidopsis thaliana GN=COX6A PE=3 SV=1	Cytochrome c oxidase subunit VIa	[C] KOG3469 Cytochrome c oxidase, subunit VIa/COX13
CL10024.Contig1_All		PREDICTED: uncharacterized protein LOC108206838 [Daucus carota subsp. sativus] >KZN04614.1 hypothetical protein DCAR_005451 [Daucus carota subsp. sativus]
CL10024.Contig2_All		PREDICTED: uncharacterized protein LOC108206838 [Daucus carota subsp. sativus] >KZN04614.1 hypothetical protein DCAR_005451 [Daucus carota subsp. sativus]		Domain of unknown function (DUF5086)
CL10024.Contig3_All		PREDICTED: uncharacterized protein LOC108206838 [Daucus carota subsp. sativus] >KZN04614.1 hypothetical protein DCAR_005451 [Daucus carota subsp. sativus]
CL10024.Contig4_All		PREDICTED: uncharacterized protein LOC108206838 [Daucus carota subsp. sativus] >KZN04614.1 hypothetical protein DCAR_005451 [Daucus carota subsp. sativus]
CL10025.Contig1_All	K22547//arsenate reductase [EC:1.20.4.1]	PREDICTED: rhodanese-like domain-containing protein 19, mitochondrial [Daucus carota subsp. sativus] >KZN02777.1 hypothetical protein DCAR_011532 [Daucus carota subsp. sativus]	Protein HIGH ARSENIC CONTENT 1, mitochondrial OS=Arabidopsis thaliana GN=HAC1 PE=1 SV=1		[P] KOG1530 Rhodanese-related sulfurtransferase
CL10026.Contig1_All		predicted protein, partial [Chlamydomonas reinhardtii] >EDO97182.1 predicted protein, partial [Chlamydomonas reinhardtii]			[R] KOG0255 Synaptic vesicle transporter SVOP and related transporters (major facilitator superfamily)
CL10026.Contig2_All		predicted protein, partial [Chlamydomonas reinhardtii] >EDO97182.1 predicted protein, partial [Chlamydomonas reinhardtii]			[R] KOG0255 Synaptic vesicle transporter SVOP and related transporters (major facilitator superfamily)
CL10027.Contig1_All		PREDICTED: uncharacterized protein LOC108204573 isoform X2 [Daucus carota subsp. sativus]
CL10027.Contig2_All		PREDICTED: uncharacterized protein LOC108204573 isoform X2 [Daucus carota subsp. sativus]
CL10028.Contig1_All
CL10028.Contig2_All	K08145//MFS transporter, SP family, solute carrier family 2 (facilitated glucose transporter), member 8	PREDICTED: sugar transporter ERD6-like 6 isoform X2 [Daucus carota subsp. sativus]	Sugar transporter ERD6-like 6 OS=Arabidopsis thaliana GN=At1g75220 PE=1 SV=1		[R] KOG0254 Predicted transporter (major facilitator superfamily)
CL1003.Contig10_All	K10738//DNA helicase MCM9 [EC:3.6.4.12]	PREDICTED: LMBR1 domain-containing protein 2 homolog A isoform X1 [Daucus carota subsp. sativus]		LMBR1-like membrane protein	[R] KOG2296 Integral membrane protein
CL1003.Contig11_All	K10738//DNA helicase MCM9 [EC:3.6.4.12]	PREDICTED: LMBR1 domain-containing protein 2 homolog A-like [Daucus carota subsp. sativus]		LMBR1-like membrane protein	[R] KOG2296 Integral membrane protein
CL1003.Contig12_All	K10738//DNA helicase MCM9 [EC:3.6.4.12]	PREDICTED: LMBR1 domain-containing protein 2 homolog A isoform X1 [Vitis vinifera] >XP_019076587.1 PREDICTED: LMBR1 domain-containing protein 2 homolog A isoform X2 [Vitis vinifera] >CBI33147.3 unnamed protein product, partial [Vitis vinifera]		LMBR1-like membrane protein	[R] KOG2296 Integral membrane protein
CL1003.Contig1_All	K10738//DNA helicase MCM9 [EC:3.6.4.12]	PREDICTED: LMBR1 domain-containing protein 2 homolog A isoform X1 [Daucus carota subsp. sativus]		LMBR1-like membrane protein	[R] KOG2296 Integral membrane protein
CL1003.Contig2_All	K10738//DNA helicase MCM9 [EC:3.6.4.12]	PREDICTED: LMBR1 domain-containing protein 2 homolog A isoform X2 [Daucus carota subsp. sativus]		LMBR1-like membrane protein	[R] KOG2296 Integral membrane protein
CL1003.Contig3_All	K10738//DNA helicase MCM9 [EC:3.6.4.12]	PREDICTED: LMBR1 domain-containing protein 2 homolog A-like [Daucus carota subsp. sativus]		LMBR1-like membrane protein	[R] KOG2296 Integral membrane protein
CL1003.Contig4_All	K10738//DNA helicase MCM9 [EC:3.6.4.12]	PREDICTED: LMBR1 domain-containing protein 2 homolog A-like [Daucus carota subsp. sativus]		LMBR1-like membrane protein	[R] KOG2296 Integral membrane protein
CL1003.Contig5_All	K10738//DNA helicase MCM9 [EC:3.6.4.12]	PREDICTED: LMBR1 domain-containing protein 2 homolog A-like [Daucus carota subsp. sativus]		LMBR1-like membrane protein	[R] KOG2296 Integral membrane protein
CL1003.Contig6_All	K10738//DNA helicase MCM9 [EC:3.6.4.12]	PREDICTED: LMBR1 domain-containing protein 2 homolog A isoform X2 [Daucus carota subsp. sativus]		LMBR1-like membrane protein	[R] KOG2296 Integral membrane protein
CL1003.Contig7_All	K10738//DNA helicase MCM9 [EC:3.6.4.12]	PREDICTED: LMBR1 domain-containing protein 2 homolog A isoform X1 [Daucus carota subsp. sativus]		LMBR1-like membrane protein	[R] KOG2296 Integral membrane protein
CL1003.Contig8_All	K10738//DNA helicase MCM9 [EC:3.6.4.12]	PREDICTED: LMBR1 domain-containing protein 2 homolog A isoform X2 [Daucus carota subsp. sativus]		LMBR1-like membrane protein	[R] KOG2296 Integral membrane protein
CL1003.Contig9_All	K10738//DNA helicase MCM9 [EC:3.6.4.12]	hypothetical protein CDL15_Pgr001753 [Punica granatum]		LMBR1-like membrane protein	[R] KOG2296 Integral membrane protein
CL10030.Contig1_All	K17500//integrin-linked kinase-associated serine/threonine phosphatase 2C [EC:3.1.3.16]	PREDICTED: probable protein phosphatase 2C 8 isoform X2 [Daucus carota subsp. sativus]	Probable protein phosphatase 2C 8 OS=Arabidopsis thaliana GN=At1g18030 PE=2 SV=2	Protein phosphatase 2C	[T] KOG0698 Serine/threonine protein phosphatase
CL10030.Contig2_All	K17500//integrin-linked kinase-associated serine/threonine phosphatase 2C [EC:3.1.3.16]	PREDICTED: probable protein phosphatase 2C 8 isoform X4 [Daucus carota subsp. sativus]	Probable protein phosphatase 2C 8 OS=Arabidopsis thaliana GN=At1g18030 PE=2 SV=2	Protein phosphatase 2C	[T] KOG0698 Serine/threonine protein phosphatase
CL10030.Contig3_All	K17500//integrin-linked kinase-associated serine/threonine phosphatase 2C [EC:3.1.3.16]	PREDICTED: probable protein phosphatase 2C 8 isoform X2 [Daucus carota subsp. sativus]	Probable protein phosphatase 2C 8 OS=Arabidopsis thaliana GN=At1g18030 PE=2 SV=2	Protein phosphatase 2C	[T] KOG0698 Serine/threonine protein phosphatase
CL10030.Contig4_All	K17500//integrin-linked kinase-associated serine/threonine phosphatase 2C [EC:3.1.3.16]	PREDICTED: probable protein phosphatase 2C 8 isoform X4 [Daucus carota subsp. sativus]	Probable protein phosphatase 2C 8 OS=Arabidopsis thaliana GN=At1g18030 PE=2 SV=2	Protein phosphatase 2C	[T] KOG0698 Serine/threonine protein phosphatase
CL10030.Contig5_All	K17500//integrin-linked kinase-associated serine/threonine phosphatase 2C [EC:3.1.3.16]	PREDICTED: probable protein phosphatase 2C 8 isoform X2 [Daucus carota subsp. sativus]	Probable protein phosphatase 2C 8 OS=Arabidopsis thaliana GN=At1g18030 PE=2 SV=2	Protein phosphatase 2C	[T] KOG0698 Serine/threonine protein phosphatase
CL10030.Contig6_All	K17500//integrin-linked kinase-associated serine/threonine phosphatase 2C [EC:3.1.3.16]	PREDICTED: probable protein phosphatase 2C 8 isoform X2 [Daucus carota subsp. sativus]	Probable protein phosphatase 2C 8 OS=Arabidopsis thaliana GN=At1g18030 PE=2 SV=2	Protein phosphatase 2C	[T] KOG0698 Serine/threonine protein phosphatase
CL10031.Contig1_All		PREDICTED: protein LURP-one-related 12-like [Daucus carota subsp. sativus] >KZM93016.1 hypothetical protein DCAR_016261 [Daucus carota subsp. sativus]	Protein LURP-one-related 12 OS=Arabidopsis thaliana GN=At3g15810 PE=2 SV=1	LURP-one-related
CL10031.Contig2_All	K03239//translation initiation factor eIF-2B subunit alpha+ko03013//RNA transport	PREDICTED: protein LURP-one-related 12-like [Daucus carota subsp. sativus] >KZM93016.1 hypothetical protein DCAR_016261 [Daucus carota subsp. sativus]	Protein LURP-one-related 5 OS=Arabidopsis thaliana GN=At1g80120 PE=2 SV=1	LURP-one-related
CL10032.Contig1_All	K12865//polyglutamine-binding protein 1+ko03040//Spliceosome	PREDICTED: uncharacterized protein LOC108219513 isoform X1 [Daucus carota subsp. sativus] >XP_017248486.1 PREDICTED: uncharacterized protein LOC108219513 isoform X1 [Daucus carota subsp. sativus]	Pre-mRNA-processing protein 40C OS=Arabidopsis thaliana GN=MED35C PE=1 SV=1	WW domain	[K] KOG3427 Polyglutamine tract-binding protein PQBP-1
CL10032.Contig2_All	K12865//polyglutamine-binding protein 1+ko03040//Spliceosome	PREDICTED: uncharacterized protein LOC108219513 isoform X1 [Daucus carota subsp. sativus] >XP_017248486.1 PREDICTED: uncharacterized protein LOC108219513 isoform X1 [Daucus carota subsp. sativus]	Pre-mRNA-processing protein 40C OS=Arabidopsis thaliana GN=MED35C PE=1 SV=1	WW domain	[K] KOG3427 Polyglutamine tract-binding protein PQBP-1
CL10032.Contig3_All	K12865//polyglutamine-binding protein 1+ko03040//Spliceosome	PREDICTED: uncharacterized protein LOC108219513 isoform X1 [Daucus carota subsp. sativus] >XP_017248486.1 PREDICTED: uncharacterized protein LOC108219513 isoform X1 [Daucus carota subsp. sativus]	Pre-mRNA-processing protein 40C OS=Arabidopsis thaliana GN=MED35C PE=1 SV=1	WW domain	[K] KOG3427 Polyglutamine tract-binding protein PQBP-1
CL10032.Contig4_All	K12865//polyglutamine-binding protein 1+ko03040//Spliceosome	PREDICTED: uncharacterized protein LOC108219513 isoform X1 [Daucus carota subsp. sativus] >XP_017248486.1 PREDICTED: uncharacterized protein LOC108219513 isoform X1 [Daucus carota subsp. sativus]	Pre-mRNA-processing protein 40C OS=Arabidopsis thaliana GN=MED35C PE=1 SV=1	WW domain	[K] KOG3427 Polyglutamine tract-binding protein PQBP-1
CL10032.Contig5_All	K12865//polyglutamine-binding protein 1+ko03040//Spliceosome	PREDICTED: uncharacterized protein LOC108219513 isoform X1 [Daucus carota subsp. sativus] >XP_017248486.1 PREDICTED: uncharacterized protein LOC108219513 isoform X1 [Daucus carota subsp. sativus]	Pre-mRNA-processing protein 40C OS=Arabidopsis thaliana GN=MED35C PE=1 SV=1	WW domain	[K] KOG3427 Polyglutamine tract-binding protein PQBP-1
CL10032.Contig6_All	K12865//polyglutamine-binding protein 1+ko03040//Spliceosome	PREDICTED: uncharacterized protein LOC108219513 isoform X1 [Daucus carota subsp. sativus] >XP_017248486.1 PREDICTED: uncharacterized protein LOC108219513 isoform X1 [Daucus carota subsp. sativus]	Pre-mRNA-processing protein 40C OS=Arabidopsis thaliana GN=MED35C PE=1 SV=1	WW domain	[K] KOG3427 Polyglutamine tract-binding protein PQBP-1
CL10033.Contig10_All	K14805//ATP-dependent RNA helicase DDX24/MAK5 [EC:3.6.4.13]	PREDICTED: DEAD-box ATP-dependent RNA helicase 13 [Daucus carota subsp. sativus] >KZM87164.1 hypothetical protein DCAR_024298 [Daucus carota subsp. sativus]	DEAD-box ATP-dependent RNA helicase 13 OS=Oryza sativa subsp. indica GN=OsI_016050 PE=3 SV=2		[A] KOG0347 RNA helicase
CL10033.Contig11_All	K14805//ATP-dependent RNA helicase DDX24/MAK5 [EC:3.6.4.13]	PREDICTED: DEAD-box ATP-dependent RNA helicase 13 [Daucus carota subsp. sativus] >KZM87164.1 hypothetical protein DCAR_024298 [Daucus carota subsp. sativus]	DEAD-box ATP-dependent RNA helicase 13 OS=Oryza sativa subsp. indica GN=OsI_016050 PE=3 SV=2		[A] KOG0347 RNA helicase
CL10033.Contig12_All
CL10033.Contig13_All	K14805//ATP-dependent RNA helicase DDX24/MAK5 [EC:3.6.4.13]	PREDICTED: DEAD-box ATP-dependent RNA helicase 13 [Daucus carota subsp. sativus] >KZM87164.1 hypothetical protein DCAR_024298 [Daucus carota subsp. sativus]	Type I inositol polyphosphate 5-phosphatase 13 OS=Arabidopsis thaliana GN=IP5P13 PE=1 SV=1		[U] KOG0565 Inositol polyphosphate 5-phosphatase and related proteins
CL10033.Contig1_All	K14805//ATP-dependent RNA helicase DDX24/MAK5 [EC:3.6.4.13]	PREDICTED: DEAD-box ATP-dependent RNA helicase 13 [Daucus carota subsp. sativus] >KZM87164.1 hypothetical protein DCAR_024298 [Daucus carota subsp. sativus]	DEAD-box ATP-dependent RNA helicase 13 OS=Arabidopsis thaliana GN=RH13 PE=2 SV=3	Helicase conserved C-terminal domain	[A] KOG0347 RNA helicase
CL10033.Contig2_All	K14805//ATP-dependent RNA helicase DDX24/MAK5 [EC:3.6.4.13]	PREDICTED: DEAD-box ATP-dependent RNA helicase 13 [Daucus carota subsp. sativus] >KZM87164.1 hypothetical protein DCAR_024298 [Daucus carota subsp. sativus]	DEAD-box ATP-dependent RNA helicase 13 OS=Arabidopsis thaliana GN=RH13 PE=2 SV=3		[A] KOG0347 RNA helicase
CL10033.Contig3_All	K14805//ATP-dependent RNA helicase DDX24/MAK5 [EC:3.6.4.13]	PREDICTED: DEAD-box ATP-dependent RNA helicase 13 [Daucus carota subsp. sativus] >KZM87164.1 hypothetical protein DCAR_024298 [Daucus carota subsp. sativus]	DEAD-box ATP-dependent RNA helicase 13 OS=Arabidopsis thaliana GN=RH13 PE=2 SV=3	DEAD/DEAH box helicase	[A] KOG0347 RNA helicase
CL10033.Contig4_All	K14805//ATP-dependent RNA helicase DDX24/MAK5 [EC:3.6.4.13]	PREDICTED: DEAD-box ATP-dependent RNA helicase 13 [Daucus carota subsp. sativus] >KZM87164.1 hypothetical protein DCAR_024298 [Daucus carota subsp. sativus]	DEAD-box ATP-dependent RNA helicase 13 OS=Oryza sativa subsp. indica GN=OsI_016050 PE=3 SV=2		[A] KOG0347 RNA helicase
CL10033.Contig5_All	K14805//ATP-dependent RNA helicase DDX24/MAK5 [EC:3.6.4.13]	PREDICTED: DEAD-box ATP-dependent RNA helicase 13 [Daucus carota subsp. sativus] >KZM87164.1 hypothetical protein DCAR_024298 [Daucus carota subsp. sativus]	Type I inositol polyphosphate 5-phosphatase 13 OS=Arabidopsis thaliana GN=IP5P13 PE=1 SV=1		[U] KOG0565 Inositol polyphosphate 5-phosphatase and related proteins
CL10033.Contig6_All	K14805//ATP-dependent RNA helicase DDX24/MAK5 [EC:3.6.4.13]	PREDICTED: type I inositol polyphosphate 5-phosphatase 13-like [Daucus carota subsp. sativus] >KZM85080.1 hypothetical protein DCAR_027498 [Daucus carota subsp. sativus]	Type I inositol polyphosphate 5-phosphatase 13 OS=Arabidopsis thaliana GN=IP5P13 PE=1 SV=1		[U] KOG0565 Inositol polyphosphate 5-phosphatase and related proteins
CL10033.Contig7_All	K14805//ATP-dependent RNA helicase DDX24/MAK5 [EC:3.6.4.13]	PREDICTED: type I inositol polyphosphate 5-phosphatase 13-like [Daucus carota subsp. sativus] >KZM85080.1 hypothetical protein DCAR_027498 [Daucus carota subsp. sativus]	Type I inositol polyphosphate 5-phosphatase 13 OS=Arabidopsis thaliana GN=IP5P13 PE=1 SV=1		[U] KOG0565 Inositol polyphosphate 5-phosphatase and related proteins
CL10033.Contig8_All	K14805//ATP-dependent RNA helicase DDX24/MAK5 [EC:3.6.4.13]	PREDICTED: type I inositol polyphosphate 5-phosphatase 13-like [Daucus carota subsp. sativus] >KZM85080.1 hypothetical protein DCAR_027498 [Daucus carota subsp. sativus]	Type I inositol polyphosphate 5-phosphatase 13 OS=Arabidopsis thaliana GN=IP5P13 PE=1 SV=1		[U] KOG0565 Inositol polyphosphate 5-phosphatase and related proteins
CL10033.Contig9_All	K14805//ATP-dependent RNA helicase DDX24/MAK5 [EC:3.6.4.13]	PREDICTED: DEAD-box ATP-dependent RNA helicase 13 [Daucus carota subsp. sativus] >KZM87164.1 hypothetical protein DCAR_024298 [Daucus carota subsp. sativus]	DEAD-box ATP-dependent RNA helicase 13 OS=Arabidopsis thaliana GN=RH13 PE=2 SV=3	DEAD/DEAH box helicase	[A] KOG0347 RNA helicase
CL10034.Contig1_All	K13648//alpha-1,4-galacturonosyltransferase [EC:2.4.1.43]+ko00520//Amino sugar and nucleotide sugar metabolism	PREDICTED: probable galacturonosyltransferase 10 [Daucus carota subsp. sativus]	Probable galacturonosyltransferase 10 OS=Arabidopsis thaliana GN=GAUT10 PE=2 SV=2	Glycosyl transferase family 8	[S] LSE0371 A Predicted glycosyltransferase
CL10034.Contig2_All	K13648//alpha-1,4-galacturonosyltransferase [EC:2.4.1.43]+ko00520//Amino sugar and nucleotide sugar metabolism	PREDICTED: probable galacturonosyltransferase 10 [Daucus carota subsp. sativus]	Probable galacturonosyltransferase 10 OS=Arabidopsis thaliana GN=GAUT10 PE=2 SV=2	Glycosyl transferase family 8	[S] LSE0371 A Predicted glycosyltransferase
CL10034.Contig3_All	K13648//alpha-1,4-galacturonosyltransferase [EC:2.4.1.43]+ko00520//Amino sugar and nucleotide sugar metabolism	hypothetical protein DCAR_009729 [Daucus carota subsp. sativus]	Probable galacturonosyltransferase 10 OS=Arabidopsis thaliana GN=GAUT10 PE=2 SV=2	Glycosyl transferase family 8	[S] LSE0371 A Predicted glycosyltransferase
CL10035.Contig1_All	K19090//CRISPR-associated protein Cas5t;K22733//magnesium transporter;K06066//CBF1 interacting corepressor;K06180//23S rRNA pseudouridine1911/1915/1917 synthase [EC:5.4.99.23]	PREDICTED: pentatricopeptide repeat-containing protein At1g33350 [Daucus carota subsp. sativus] >XP_017227086.1 PREDICTED: pentatricopeptide repeat-containing protein At1g33350 [Daucus carota subsp. sativus]	Pentatricopeptide repeat-containing protein At1g33350 OS=Arabidopsis thaliana GN=PCMP-E57 PE=2 SV=1		[R] KOG4197 FOG: PPR repeat
CL10035.Contig2_All	K19589//release factor glutamine methyltransferase [EC:2.1.1.297];K06180//23S rRNA pseudouridine1911/1915/1917 synthase [EC:5.4.99.23]	PREDICTED: pentatricopeptide repeat-containing protein At1g33350 [Daucus carota subsp. sativus] >XP_017227086.1 PREDICTED: pentatricopeptide repeat-containing protein At1g33350 [Daucus carota subsp. sativus]	Pentatricopeptide repeat-containing protein At1g33350 OS=Arabidopsis thaliana GN=PCMP-E57 PE=2 SV=1	PPR repeat	[R] KOG4197 FOG: PPR repeat
CL10036.Contig1_All	K02160//acetyl-CoA carboxylase biotin carboxyl carrier protein+ko00640//Propanoate metabolism+ko01100//Metabolic pathways+ko01110//Biosynthesis of secondary metabolites+ko00061//Fatty acid biosynthesis+ko01212//Fatty acid metabolism+ko00620//Pyruvate metabolism+ko01200//Carbon metabolism	PREDICTED: biotin carboxyl carrier protein of acetyl-CoA carboxylase-like isoform X2 [Daucus carota subsp. sativus]	Biotin carboxyl carrier protein of acetyl-CoA carboxylase 2, chloroplastic OS=Arabidopsis thaliana GN=BCCP2 PE=2 SV=1	Biotin-requiring enzyme	[I] LSE0074 A Acetyl-CoA carboxylase, biotin carboxyl carrier protein
CL10036.Contig2_All
CL10037.Contig1_All		PREDICTED: uncharacterized protein LOC108204066 [Daucus carota subsp. sativus]
CL10037.Contig3_All		PREDICTED: uncharacterized protein LOC108204066 [Daucus carota subsp. sativus]
CL10039.Contig1_All		PREDICTED: uncharacterized protein LOC108227907 [Daucus carota subsp. sativus]	Protein BRANCHLESS TRICHOME OS=Arabidopsis thaliana GN=BLT PE=1 SV=1	Caulimovirus DNA-binding protein	[S] LSE0124 A Uncharacterized protein
CL10039.Contig2_All		PREDICTED: uncharacterized protein LOC108223726 isoform X1 [Daucus carota subsp. sativus] >KZM93459.1 hypothetical protein DCAR_016704 [Daucus carota subsp. sativus]	Protein BRANCHLESS TRICHOME OS=Arabidopsis thaliana GN=BLT PE=1 SV=1	Centromere protein H (CENP-H)	[S] LSE0124 A Uncharacterized protein
CL1004.Contig1_All	K13237//peroxisomal 2,4-dienoyl-CoA reductase [EC:1.3.1.34]+ko04146//Peroxisome	hypothetical protein AXG93_517s1190 [Marchantia polymorpha subsp. ruderalis]	3-dehydrosphinganine reductase TSC10B OS=Arabidopsis thaliana GN=TSC10B PE=1 SV=1	short chain dehydrogenase	[R] KOG0725 Reductases with broad range of substrate specificities
CL1004.Contig2_All	K13237//peroxisomal 2,4-dienoyl-CoA reductase [EC:1.3.1.34]+ko04146//Peroxisome	predicted protein [Physcomitrella patens] >EDQ75168.1 predicted protein [Physcomitrella patens]	3-dehydrosphinganine reductase TSC10B OS=Arabidopsis thaliana GN=TSC10B PE=1 SV=1	short chain dehydrogenase	[R] KOG0725 Reductases with broad range of substrate specificities
CL10040.Contig1_All	K00826//branched-chain amino acid aminotransferase [EC:2.6.1.42]+ko00290//Valine, leucine and isoleucine biosynthesis+ko00280//Valine, leucine and isoleucine degradation+ko00770//Pantothenate and CoA biosynthesis+ko01230//Biosynthesis of amino acids+ko01100//Metabolic pathways+ko01110//Biosynthesis of secondary metabolites+ko01210//2-Oxocarboxylic acid metabolism+ko00270//Cysteine and methionine …	PREDICTED: branched-chain-amino-acid aminotransferase 3, chloroplastic-like [Daucus carota subsp. sativus] >KZM98316.1 hypothetical protein DCAR_014322 [Daucus carota subsp. sativus]	Branched-chain-amino-acid aminotransferase 2, chloroplastic OS=Arabidopsis thaliana GN=BCAT2 PE=1 SV=1	ATP synthase D chain, mitochondrial (ATP5H)	[E] KOG0975 Branched chain aminotransferase BCAT1, pyridoxal phosphate enzymes type IV superfamily
CL10040.Contig2_All	K00826//branched-chain amino acid aminotransferase [EC:2.6.1.42]+ko00290//Valine, leucine and isoleucine biosynthesis+ko00280//Valine, leucine and isoleucine degradation+ko00770//Pantothenate and CoA biosynthesis+ko01230//Biosynthesis of amino acids+ko01100//Metabolic pathways+ko01110//Biosynthesis of secondary metabolites+ko01210//2-Oxocarboxylic acid metabolism+ko00270//Cysteine and methionine …	PREDICTED: branched-chain-amino-acid aminotransferase 3, chloroplastic-like [Daucus carota subsp. sativus] >KZM98316.1 hypothetical protein DCAR_014322 [Daucus carota subsp. sativus]	Branched-chain amino acid aminotransferase 2, chloroplastic OS=Humulus lupulus GN=BCAT2 PE=1 SV=1	Amino-transferase class IV	[E] KOG0975 Branched chain aminotransferase BCAT1, pyridoxal phosphate enzymes type IV superfamily
CL10040.Contig3_All	K00826//branched-chain amino acid aminotransferase [EC:2.6.1.42]+ko00290//Valine, leucine and isoleucine biosynthesis+ko00280//Valine, leucine and isoleucine degradation+ko00770//Pantothenate and CoA biosynthesis+ko01230//Biosynthesis of amino acids+ko01100//Metabolic pathways+ko01110//Biosynthesis of secondary metabolites+ko01210//2-Oxocarboxylic acid metabolism+ko00270//Cysteine and methionine …	PREDICTED: branched-chain-amino-acid aminotransferase 5, chloroplastic-like [Daucus carota subsp. sativus] >XP_017216064.1 PREDICTED: branched-chain-amino-acid aminotransferase 5, chloroplastic-like [Daucus carota subsp. sativus] >KZM88756.1 hypothetical protein DCAR_025831 [Daucus carota subsp. sativus]	Branched-chain amino acid aminotransferase 2, chloroplastic OS=Humulus lupulus GN=BCAT2 PE=1 SV=1		[E] KOG0975 Branched chain aminotransferase BCAT1, pyridoxal phosphate enzymes type IV superfamily
CL10040.Contig4_All	K00826//branched-chain amino acid aminotransferase [EC:2.6.1.42]+ko00290//Valine, leucine and isoleucine biosynthesis+ko00280//Valine, leucine and isoleucine degradation+ko00770//Pantothenate and CoA biosynthesis+ko01230//Biosynthesis of amino acids+ko01100//Metabolic pathways+ko01110//Biosynthesis of secondary metabolites+ko01210//2-Oxocarboxylic acid metabolism+ko00270//Cysteine and methionine …	PREDICTED: branched-chain-amino-acid aminotransferase 5, chloroplastic-like [Daucus carota subsp. sativus] >XP_017216064.1 PREDICTED: branched-chain-amino-acid aminotransferase 5, chloroplastic-like [Daucus carota subsp. sativus] >KZM88756.1 hypothetical protein DCAR_025831 [Daucus carota subsp. sativus]	Branched-chain amino acid aminotransferase 2, chloroplastic OS=Humulus lupulus GN=BCAT2 PE=1 SV=1	Amino-transferase class IV	[E] KOG0975 Branched chain aminotransferase BCAT1, pyridoxal phosphate enzymes type IV superfamily
CL10040.Contig5_All	K00826//branched-chain amino acid aminotransferase [EC:2.6.1.42]+ko00290//Valine, leucine and isoleucine biosynthesis+ko00280//Valine, leucine and isoleucine degradation+ko00770//Pantothenate and CoA biosynthesis+ko01230//Biosynthesis of amino acids+ko01100//Metabolic pathways+ko01110//Biosynthesis of secondary metabolites+ko01210//2-Oxocarboxylic acid metabolism+ko00270//Cysteine and methionine …	PREDICTED: branched-chain-amino-acid aminotransferase 5, chloroplastic-like [Daucus carota subsp. sativus] >XP_017216064.1 PREDICTED: branched-chain-amino-acid aminotransferase 5, chloroplastic-like [Daucus carota subsp. sativus] >KZM88756.1 hypothetical protein DCAR_025831 [Daucus carota subsp. sativus]	Branched-chain amino acid aminotransferase 2, chloroplastic OS=Humulus lupulus GN=BCAT2 PE=1 SV=1	Amino-transferase class IV	[E] KOG0975 Branched chain aminotransferase BCAT1, pyridoxal phosphate enzymes type IV superfamily
CL10040.Contig6_All	K00826//branched-chain amino acid aminotransferase [EC:2.6.1.42]+ko00290//Valine, leucine and isoleucine biosynthesis+ko00280//Valine, leucine and isoleucine degradation+ko00770//Pantothenate and CoA biosynthesis+ko01230//Biosynthesis of amino acids+ko01100//Metabolic pathways+ko01110//Biosynthesis of secondary metabolites+ko01210//2-Oxocarboxylic acid metabolism+ko00270//Cysteine and methionine …	PREDICTED: branched-chain-amino-acid aminotransferase 3, chloroplastic-like [Daucus carota subsp. sativus] >KZM98316.1 hypothetical protein DCAR_014322 [Daucus carota subsp. sativus]	Branched-chain amino acid aminotransferase 2, chloroplastic OS=Humulus lupulus GN=BCAT2 PE=1 SV=1	Amino-transferase class IV	[E] KOG0975 Branched chain aminotransferase BCAT1, pyridoxal phosphate enzymes type IV superfamily
CL10040.Contig7_All	K00826//branched-chain amino acid aminotransferase [EC:2.6.1.42]+ko00290//Valine, leucine and isoleucine biosynthesis+ko00280//Valine, leucine and isoleucine degradation+ko00770//Pantothenate and CoA biosynthesis+ko01230//Biosynthesis of amino acids+ko01100//Metabolic pathways+ko01110//Biosynthesis of secondary metabolites+ko01210//2-Oxocarboxylic acid metabolism+ko00270//Cysteine and methionine …	PREDICTED: branched-chain-amino-acid aminotransferase 3, chloroplastic-like [Nicotiana attenuata] >OIT34421.1 branched-chain-amino-acid aminotransferase 3, chloroplastic [Nicotiana attenuata]	Branched-chain amino acid aminotransferase 2, chloroplastic OS=Humulus lupulus GN=BCAT2 PE=1 SV=1	Amino-transferase class IV	[E] KOG0975 Branched chain aminotransferase BCAT1, pyridoxal phosphate enzymes type IV superfamily
CL10041.Contig1_All		hypothetical protein ALNC14_137980 [Albugo laibachii Nc14]	Protein Ric1 OS=Phytophthora infestans GN=RIC1 PE=3 SV=1		[R] KOG1773 Stress responsive protein
CL10041.Contig2_All		unnamed protein product [Albugo candida]	Protein Ric1 OS=Phytophthora infestans GN=RIC1 PE=3 SV=1		[R] KOG1773 Stress responsive protein
CL10042.Contig1_All	K00873//pyruvate kinase [EC:2.7.1.40]+ko00010//Glycolysis / Gluconeogenesis+ko00230//Purine metabolism+ko01230//Biosynthesis of amino acids+ko01100//Metabolic pathways+ko01110//Biosynthesis of secondary metabolites+ko00620//Pyruvate metabolism+ko01200//Carbon metabolism	PREDICTED: plastidial pyruvate kinase 2 isoform X1 [Daucus carota subsp. sativus]	Plastidial pyruvate kinase 2 OS=Arabidopsis thaliana GN=PKP2 PE=1 SV=1	Pyruvate kinase, barrel domain	[G] KOG2323 Pyruvate kinase
CL10042.Contig2_All	K00873//pyruvate kinase [EC:2.7.1.40]+ko00010//Glycolysis / Gluconeogenesis+ko00230//Purine metabolism+ko01230//Biosynthesis of amino acids+ko01100//Metabolic pathways+ko01110//Biosynthesis of secondary metabolites+ko00620//Pyruvate metabolism+ko01200//Carbon metabolism	PREDICTED: plastidial pyruvate kinase 2 isoform X1 [Daucus carota subsp. sativus]	Plastidial pyruvate kinase 2 OS=Arabidopsis thaliana GN=PKP2 PE=1 SV=1	Pyruvate kinase, barrel domain	[G] KOG2323 Pyruvate kinase
CL10042.Contig3_All	K00873//pyruvate kinase [EC:2.7.1.40]+ko00010//Glycolysis / Gluconeogenesis+ko00230//Purine metabolism+ko01230//Biosynthesis of amino acids+ko01100//Metabolic pathways+ko01110//Biosynthesis of secondary metabolites+ko00620//Pyruvate metabolism+ko01200//Carbon metabolism	PREDICTED: plastidial pyruvate kinase 2 isoform X1 [Daucus carota subsp. sativus]	Plastidial pyruvate kinase 2 OS=Arabidopsis thaliana GN=PKP2 PE=1 SV=1	Pyruvate kinase, barrel domain	[G] KOG2323 Pyruvate kinase
CL10043.Contig1_All	K20843//hydroxyproline O-galactosyltransferase 2/3/4/5/6 [EC:2.4.1.-]	PREDICTED: hydroxyproline O-galactosyltransferase GALT3 [Daucus carota subsp. sativus] >KZN09875.1 hypothetical protein DCAR_002531 [Daucus carota subsp. sativus]	Hydroxyproline O-galactosyltransferase GALT3 OS=Arabidopsis thaliana GN=GALT3 PE=2 SV=1	Galactosyltransferase	[G] KOG2287 Galactosyltransferases
CL10043.Contig2_All	K20843//hydroxyproline O-galactosyltransferase 2/3/4/5/6 [EC:2.4.1.-]	hypothetical protein CICLE_v10004515mg [Citrus clementina] >ESR32532.1 hypothetical protein CICLE_v10004515mg [Citrus clementina]	Hydroxyproline O-galactosyltransferase GALT3 OS=Arabidopsis thaliana GN=GALT3 PE=2 SV=1	Galactosyltransferase	[G] KOG2287 Galactosyltransferases
CL10044.Contig1_All	K00759//adenine phosphoribosyltransferase [EC:2.4.2.7]+ko00230//Purine metabolism+ko01100//Metabolic pathways	PREDICTED: adenine phosphoribosyltransferase 1-like [Daucus carota subsp. sativus]	Adenine phosphoribosyltransferase 1 OS=Triticum aestivum GN=APT1 PE=2 SV=1	Phosphoribosyl transferase domain	[F] KOG1712 Adenine phosphoribosyl transferases
CL10044.Contig2_All	K00759//adenine phosphoribosyltransferase [EC:2.4.2.7]+ko00230//Purine metabolism+ko01100//Metabolic pathways	PREDICTED: adenine phosphoribosyltransferase 1-like [Daucus carota subsp. sativus]	Adenine phosphoribosyltransferase 1 OS=Triticum aestivum GN=APT1 PE=2 SV=1	Phosphoribosyl transferase domain	[F] KOG1712 Adenine phosphoribosyl transferases
CL10044.Contig3_All	K00759//adenine phosphoribosyltransferase [EC:2.4.2.7]+ko00230//Purine metabolism+ko01100//Metabolic pathways	PREDICTED: adenine phosphoribosyltransferase 1-like [Daucus carota subsp. sativus]	Adenine phosphoribosyltransferase 1 OS=Triticum aestivum GN=APT1 PE=2 SV=1	Phosphoribosyl transferase domain	[F] KOG1712 Adenine phosphoribosyl transferases
CL10045.Contig1_All	K13680//beta-mannan synthase [EC:2.4.1.32]	PREDICTED: glucomannan 4-beta-mannosyltransferase 1-like [Daucus carota subsp. sativus] >KZM95801.1 hypothetical protein DCAR_019043 [Daucus carota subsp. sativus]	Glucomannan 4-beta-mannosyltransferase 9 OS=Arabidopsis thaliana GN=CSLA9 PE=2 SV=1		[G] LSE0130 A Glucosyltransferase
CL10045.Contig2_All	K13680//beta-mannan synthase [EC:2.4.1.32]	PREDICTED: glucomannan 4-beta-mannosyltransferase 1-like [Daucus carota subsp. sativus] >KZM95801.1 hypothetical protein DCAR_019043 [Daucus carota subsp. sativus]	Probable mannan synthase 14 OS=Arabidopsis thaliana GN=CSLA14 PE=2 SV=2		[G] LSE0130 A Glucosyltransferase
CL10045.Contig3_All	K13680//beta-mannan synthase [EC:2.4.1.32]	PREDICTED: glucomannan 4-beta-mannosyltransferase 9-like [Daucus carota subsp. sativus]	Glucomannan 4-beta-mannosyltransferase 9 OS=Arabidopsis thaliana GN=CSLA9 PE=2 SV=1		[G] LSE0130 A Glucosyltransferase
CL10045.Contig4_All	K13680//beta-mannan synthase [EC:2.4.1.32]	PREDICTED: glucomannan 4-beta-mannosyltransferase 1-like [Daucus carota subsp. sativus] >KZM95801.1 hypothetical protein DCAR_019043 [Daucus carota subsp. sativus]	Glucomannan 4-beta-mannosyltransferase 9 OS=Arabidopsis thaliana GN=CSLA9 PE=2 SV=1	Glycosyltransferase like family 2	[G] LSE0130 A Glucosyltransferase
CL10045.Contig5_All	K13680//beta-mannan synthase [EC:2.4.1.32]	PREDICTED: glucomannan 4-beta-mannosyltransferase 1-like [Daucus carota subsp. sativus] >KZM95801.1 hypothetical protein DCAR_019043 [Daucus carota subsp. sativus]	Glucomannan 4-beta-mannosyltransferase 9 OS=Arabidopsis thaliana GN=CSLA9 PE=2 SV=1	Glycosyltransferase like family 2	[G] LSE0130 A Glucosyltransferase
CL10045.Contig6_All	K13680//beta-mannan synthase [EC:2.4.1.32]	PREDICTED: glucomannan 4-beta-mannosyltransferase 1-like [Daucus carota subsp. sativus] >KZM95801.1 hypothetical protein DCAR_019043 [Daucus carota subsp. sativus]	Glucomannan 4-beta-mannosyltransferase 9 OS=Arabidopsis thaliana GN=CSLA9 PE=2 SV=1	Glycosyltransferase like family 2	[G] LSE0130 A Glucosyltransferase
CL10045.Contig7_All	K13680//beta-mannan synthase [EC:2.4.1.32]	PREDICTED: glucomannan 4-beta-mannosyltransferase 9-like [Daucus carota subsp. sativus] >KZM95795.1 hypothetical protein DCAR_019037 [Daucus carota subsp. sativus]	Glucomannan 4-beta-mannosyltransferase 9 OS=Arabidopsis thaliana GN=CSLA9 PE=2 SV=1	Glycosyltransferase like family 2	[G] LSE0130 A Glucosyltransferase
CL10046.Contig1_All		PREDICTED: vesicle transport protein SFT2B [Daucus carota subsp. sativus] >KZN00867.1 hypothetical protein DCAR_009621 [Daucus carota subsp. sativus]		Got1/Sft2-like family	[U] KOG2887 Membrane protein involved in ER to Golgi transport
CL10046.Contig2_All		PREDICTED: vesicle transport protein SFT2B [Daucus carota subsp. sativus] >KZN00867.1 hypothetical protein DCAR_009621 [Daucus carota subsp. sativus]		Got1/Sft2-like family	[U] KOG2887 Membrane protein involved in ER to Golgi transport
CL10046.Contig3_All		PREDICTED: vesicle transport protein SFT2B [Daucus carota subsp. sativus] >KZN00867.1 hypothetical protein DCAR_009621 [Daucus carota subsp. sativus]			[U] KOG2887 Membrane protein involved in ER to Golgi transport
CL10047.Contig1_All	K01714//4-hydroxy-tetrahydrodipicolinate synthase [EC:4.3.3.7]+ko00300//Lysine biosynthesis+ko01230//Biosynthesis of amino acids+ko01100//Metabolic pathways+ko01110//Biosynthesis of secondary metabolites+ko00261//Monobactam biosynthesis	PREDICTED: 4-hydroxy-tetrahydrodipicolinate synthase, chloroplastic-like isoform X2 [Daucus carota subsp. sativus] >KZN07727.1 hypothetical protein DCAR_008564 [Daucus carota subsp. sativus]	4-hydroxy-tetrahydrodipicolinate synthase, chloroplastic OS=Nicotiana tabacum GN=DHPS1 PE=2 SV=1	Dihydrodipicolinate synthetase family	[EM] TWOG0253 Dihydrodipicolinate synthase/Acylneuraminate lyase
CL10047.Contig2_All	K01714//4-hydroxy-tetrahydrodipicolinate synthase [EC:4.3.3.7]+ko00300//Lysine biosynthesis+ko01230//Biosynthesis of amino acids+ko01100//Metabolic pathways+ko01110//Biosynthesis of secondary metabolites+ko00261//Monobactam biosynthesis	PREDICTED: 4-hydroxy-tetrahydrodipicolinate synthase, chloroplastic-like [Daucus carota subsp. sativus] >KZN06038.1 hypothetical protein DCAR_006875 [Daucus carota subsp. sativus]	4-hydroxy-tetrahydrodipicolinate synthase, chloroplastic OS=Nicotiana tabacum GN=DHPS1 PE=2 SV=1	Dihydrodipicolinate synthetase family	[EM] TWOG0253 Dihydrodipicolinate synthase/Acylneuraminate lyase
CL10047.Contig3_All	K01714//4-hydroxy-tetrahydrodipicolinate synthase [EC:4.3.3.7]+ko00300//Lysine biosynthesis+ko01230//Biosynthesis of amino acids+ko01100//Metabolic pathways+ko01110//Biosynthesis of secondary metabolites+ko00261//Monobactam biosynthesis	PREDICTED: 4-hydroxy-tetrahydrodipicolinate synthase, chloroplastic-like isoform X2 [Daucus carota subsp. sativus] >KZN07727.1 hypothetical protein DCAR_008564 [Daucus carota subsp. sativus]	4-hydroxy-tetrahydrodipicolinate synthase, chloroplastic OS=Nicotiana tabacum GN=DHPS1 PE=2 SV=1	Dihydrodipicolinate synthetase family	[EM] TWOG0253 Dihydrodipicolinate synthase/Acylneuraminate lyase
CL10047.Contig4_All	K01714//4-hydroxy-tetrahydrodipicolinate synthase [EC:4.3.3.7]+ko00300//Lysine biosynthesis+ko01230//Biosynthesis of amino acids+ko01100//Metabolic pathways+ko01110//Biosynthesis of secondary metabolites+ko00261//Monobactam biosynthesis	PREDICTED: 4-hydroxy-tetrahydrodipicolinate synthase, chloroplastic-like [Daucus carota subsp. sativus] >KZN06038.1 hypothetical protein DCAR_006875 [Daucus carota subsp. sativus]	4-hydroxy-tetrahydrodipicolinate synthase, chloroplastic OS=Nicotiana tabacum GN=DHPS1 PE=2 SV=1	Dihydrodipicolinate synthetase family	[EM] TWOG0253 Dihydrodipicolinate synthase/Acylneuraminate lyase
CL10048.Contig1_All		PREDICTED: uncharacterized protein LOC108192963 [Daucus carota subsp. sativus]
CL10048.Contig2_All		PREDICTED: uncharacterized protein LOC108192963 [Daucus carota subsp. sativus]
CL1005.Contig10_All	K12446//L-arabinokinase [EC:2.7.1.46]+ko00520//Amino sugar and nucleotide sugar metabolism+ko01100//Metabolic pathways	PREDICTED: L-arabinokinase-like isoform X1 [Daucus carota subsp. sativus]	L-arabinokinase OS=Arabidopsis thaliana GN=ARA1 PE=1 SV=1	Glycosyl transferase family 1	[G] KOG0631 Galactokinase
CL1005.Contig11_All	K12446//L-arabinokinase [EC:2.7.1.46]+ko00520//Amino sugar and nucleotide sugar metabolism+ko01100//Metabolic pathways	PREDICTED: L-arabinokinase-like isoform X1 [Daucus carota subsp. sativus]	L-arabinokinase OS=Arabidopsis thaliana GN=ARA1 PE=1 SV=1	Glycosyl transferase family 1	[G] KOG0631 Galactokinase
CL1005.Contig12_All	K12446//L-arabinokinase [EC:2.7.1.46]+ko00520//Amino sugar and nucleotide sugar metabolism+ko01100//Metabolic pathways;K07025//putative hydrolase of the HAD superfamily	PREDICTED: K(+) efflux antiporter 2, chloroplastic-like isoform X1 [Daucus carota subsp. sativus]	K(+) efflux antiporter 2, chloroplastic OS=Arabidopsis thaliana GN=KEA2 PE=1 SV=2		[G] KOG0631 Galactokinase
CL1005.Contig13_All	K12446//L-arabinokinase [EC:2.7.1.46]+ko00520//Amino sugar and nucleotide sugar metabolism+ko01100//Metabolic pathways	PREDICTED: L-arabinokinase-like isoform X1 [Daucus carota subsp. sativus]	L-arabinokinase OS=Arabidopsis thaliana GN=ARA1 PE=1 SV=1	Glycosyl transferase family 1	[G] KOG0631 Galactokinase
CL1005.Contig14_All	K12446//L-arabinokinase [EC:2.7.1.46]+ko00520//Amino sugar and nucleotide sugar metabolism+ko01100//Metabolic pathways	PREDICTED: L-arabinokinase-like isoform X2 [Daucus carota subsp. sativus]	L-arabinokinase OS=Arabidopsis thaliana GN=ARA1 PE=1 SV=1	GHMP kinases N terminal domain	[G] KOG0631 Galactokinase
CL1005.Contig15_All		hypothetical protein DCAR_006915 [Daucus carota subsp. sativus]	K(+) efflux antiporter 2, chloroplastic OS=Arabidopsis thaliana GN=KEA2 PE=1 SV=2		[P] KOG1650 Predicted K+/H+-antiporter
CL1005.Contig16_All	K12446//L-arabinokinase [EC:2.7.1.46]+ko00520//Amino sugar and nucleotide sugar metabolism+ko01100//Metabolic pathways	PREDICTED: L-arabinokinase-like isoform X1 [Daucus carota subsp. sativus]	L-arabinokinase OS=Arabidopsis thaliana GN=ARA1 PE=1 SV=1	Glycosyl transferase family 1	[G] KOG0631 Galactokinase
CL1005.Contig17_All	K12446//L-arabinokinase [EC:2.7.1.46]+ko00520//Amino sugar and nucleotide sugar metabolism+ko01100//Metabolic pathways	PREDICTED: L-arabinokinase-like isoform X1 [Daucus carota subsp. sativus]	L-arabinokinase OS=Arabidopsis thaliana GN=ARA1 PE=1 SV=1	GHMP kinases N terminal domain	[G] KOG0631 Galactokinase
CL1005.Contig18_All	K12446//L-arabinokinase [EC:2.7.1.46]+ko00520//Amino sugar and nucleotide sugar metabolism+ko01100//Metabolic pathways	hypothetical protein DCAR_004565 [Daucus carota subsp. sativus]	L-arabinokinase OS=Arabidopsis thaliana GN=ARA1 PE=1 SV=1	GHMP kinases N terminal domain	[G] KOG0631 Galactokinase
CL1005.Contig19_All	K12446//L-arabinokinase [EC:2.7.1.46]+ko00520//Amino sugar and nucleotide sugar metabolism+ko01100//Metabolic pathways	PREDICTED: L-arabinokinase-like isoform X1 [Daucus carota subsp. sativus]	L-arabinokinase OS=Arabidopsis thaliana GN=ARA1 PE=1 SV=1	Glycosyl transferase family 1	[G] KOG0631 Galactokinase
CL1005.Contig1_All	K07025//putative hydrolase of the HAD superfamily	PREDICTED: uncharacterized protein LOC108211575 [Daucus carota subsp. sativus] >KZN03349.1 hypothetical protein DCAR_012105 [Daucus carota subsp. sativus]	L-arabinokinase OS=Arabidopsis thaliana GN=ARA1 PE=1 SV=1		[R] KOG3109 Haloacid dehalogenase-like hydrolase
CL1005.Contig20_All	K12446//L-arabinokinase [EC:2.7.1.46]+ko00520//Amino sugar and nucleotide sugar metabolism+ko01100//Metabolic pathways	PREDICTED: L-arabinokinase-like isoform X1 [Daucus carota subsp. sativus]	L-arabinokinase OS=Arabidopsis thaliana GN=ARA1 PE=1 SV=1	Glycosyl transferase family 1	[G] KOG0631 Galactokinase
CL1005.Contig21_All	K12446//L-arabinokinase [EC:2.7.1.46]+ko00520//Amino sugar and nucleotide sugar metabolism+ko01100//Metabolic pathways	PREDICTED: L-arabinokinase-like isoform X1 [Daucus carota subsp. sativus]	L-arabinokinase OS=Arabidopsis thaliana GN=ARA1 PE=1 SV=1	GHMP kinases N terminal domain	[G] KOG0631 Galactokinase
CL1005.Contig22_All	K12446//L-arabinokinase [EC:2.7.1.46]+ko00520//Amino sugar and nucleotide sugar metabolism+ko01100//Metabolic pathways	PREDICTED: L-arabinokinase-like isoform X1 [Daucus carota subsp. sativus]	L-arabinokinase OS=Arabidopsis thaliana GN=ARA1 PE=1 SV=1	GHMP kinases N terminal domain	[G] KOG0631 Galactokinase
CL1005.Contig2_All	K07025//putative hydrolase of the HAD superfamily	PREDICTED: uncharacterized protein LOC108211575 [Daucus carota subsp. sativus] >KZN03349.1 hypothetical protein DCAR_012105 [Daucus carota subsp. sativus]			[R] KOG3109 Haloacid dehalogenase-like hydrolase
CL1005.Contig3_All	K12446//L-arabinokinase [EC:2.7.1.46]+ko00520//Amino sugar and nucleotide sugar metabolism+ko01100//Metabolic pathways	PREDICTED: L-arabinokinase-like isoform X1 [Daucus carota subsp. sativus]	L-arabinokinase OS=Arabidopsis thaliana GN=ARA1 PE=1 SV=1	Glycosyl transferase family 1	[G] KOG0631 Galactokinase
CL1005.Contig4_All	K12446//L-arabinokinase [EC:2.7.1.46]+ko00520//Amino sugar and nucleotide sugar metabolism+ko01100//Metabolic pathways;K07025//putative hydrolase of the HAD superfamily	PREDICTED: K(+) efflux antiporter 2, chloroplastic-like isoform X1 [Daucus carota subsp. sativus]	K(+) efflux antiporter 2, chloroplastic OS=Arabidopsis thaliana GN=KEA2 PE=1 SV=2		[G] KOG0631 Galactokinase
CL1005.Contig5_All	K07025//putative hydrolase of the HAD superfamily	PREDICTED: uncharacterized protein LOC108211575 [Daucus carota subsp. sativus] >KZN03349.1 hypothetical protein DCAR_012105 [Daucus carota subsp. sativus]	K(+) efflux antiporter 2, chloroplastic OS=Arabidopsis thaliana GN=KEA2 PE=1 SV=2		[R] KOG3109 Haloacid dehalogenase-like hydrolase
CL1005.Contig6_All	K12446//L-arabinokinase [EC:2.7.1.46]+ko00520//Amino sugar and nucleotide sugar metabolism+ko01100//Metabolic pathways	PREDICTED: L-arabinokinase-like isoform X1 [Daucus carota subsp. sativus]	L-arabinokinase OS=Arabidopsis thaliana GN=ARA1 PE=1 SV=1	Glycosyl transferase family 1	[G] KOG0631 Galactokinase
CL1005.Contig7_All	K12446//L-arabinokinase [EC:2.7.1.46]+ko00520//Amino sugar and nucleotide sugar metabolism+ko01100//Metabolic pathways	PREDICTED: L-arabinokinase-like isoform X1 [Daucus carota subsp. sativus]	L-arabinokinase OS=Arabidopsis thaliana GN=ARA1 PE=1 SV=1	GHMP kinases C terminal	[G] KOG0631 Galactokinase
CL1005.Contig8_All	K12446//L-arabinokinase [EC:2.7.1.46]+ko00520//Amino sugar and nucleotide sugar metabolism+ko01100//Metabolic pathways	PREDICTED: L-arabinokinase-like isoform X1 [Daucus carota subsp. sativus]	L-arabinokinase OS=Arabidopsis thaliana GN=ARA1 PE=1 SV=1	GHMP kinases N terminal domain	[G] KOG0631 Galactokinase
CL1005.Contig9_All	K12446//L-arabinokinase [EC:2.7.1.46]+ko00520//Amino sugar and nucleotide sugar metabolism+ko01100//Metabolic pathways	PREDICTED: uncharacterized protein LOC108218989 [Daucus carota subsp. sativus]	L-arabinokinase OS=Arabidopsis thaliana GN=ARA1 PE=1 SV=1		[G] KOG0631 Galactokinase
CL10051.Contig1_All	K12639//cytochrome P450 family 724 subfamily B polypeptide 1 [EC:1.14.13.-]+ko00905//Brassinosteroid biosynthesis+ko01100//Metabolic pathways+ko01110//Biosynthesis of secondary metabolites	PREDICTED: cytochrome P450 724B1-like [Daucus carota subsp. sativus] >XP_017258411.1 PREDICTED: cytochrome P450 724B1-like [Daucus carota subsp. sativus] >KZM90894.1 hypothetical protein DCAR_021741 [Daucus carota subsp. sativus]	Cytochrome P450 724B1 OS=Oryza sativa subsp. japonica GN=CYP724B1 PE=1 SV=1	Cytochrome P450	[QI] KOG0157 Cytochrome P450 CYP4/CYP19/CYP26 subfamilies
CL10051.Contig2_All	K12639//cytochrome P450 family 724 subfamily B polypeptide 1 [EC:1.14.13.-]+ko00905//Brassinosteroid biosynthesis+ko01100//Metabolic pathways+ko01110//Biosynthesis of secondary metabolites	PREDICTED: cytochrome P450 724B1-like [Daucus carota subsp. sativus] >XP_017258411.1 PREDICTED: cytochrome P450 724B1-like [Daucus carota subsp. sativus] >KZM90894.1 hypothetical protein DCAR_021741 [Daucus carota subsp. sativus]	Cytochrome P450 724B1 OS=Oryza sativa subsp. japonica GN=CYP724B1 PE=1 SV=1	Cytochrome P450	[QI] KOG0157 Cytochrome P450 CYP4/CYP19/CYP26 subfamilies
CL10051.Contig3_All	K12639//cytochrome P450 family 724 subfamily B polypeptide 1 [EC:1.14.13.-]+ko00905//Brassinosteroid biosynthesis+ko01100//Metabolic pathways+ko01110//Biosynthesis of secondary metabolites	PREDICTED: cytochrome P450 724B1-like [Daucus carota subsp. sativus] >XP_017258411.1 PREDICTED: cytochrome P450 724B1-like [Daucus carota subsp. sativus] >KZM90894.1 hypothetical protein DCAR_021741 [Daucus carota subsp. sativus]	Cytochrome P450 724B1 OS=Oryza sativa subsp. japonica GN=CYP724B1 PE=1 SV=1	Cytochrome P450	[QI] KOG0157 Cytochrome P450 CYP4/CYP19/CYP26 subfamilies
CL10051.Contig4_All	K12639//cytochrome P450 family 724 subfamily B polypeptide 1 [EC:1.14.13.-]+ko00905//Brassinosteroid biosynthesis+ko01100//Metabolic pathways+ko01110//Biosynthesis of secondary metabolites	PREDICTED: cytochrome P450 724B1-like [Daucus carota subsp. sativus] >XP_017258411.1 PREDICTED: cytochrome P450 724B1-like [Daucus carota subsp. sativus] >KZM90894.1 hypothetical protein DCAR_021741 [Daucus carota subsp. sativus]	Cytochrome P450 724B1 OS=Oryza sativa subsp. japonica GN=CYP724B1 PE=1 SV=1		[QI] KOG0157 Cytochrome P450 CYP4/CYP19/CYP26 subfamilies
CL10051.Contig5_All	K12639//cytochrome P450 family 724 subfamily B polypeptide 1 [EC:1.14.13.-]+ko00905//Brassinosteroid biosynthesis+ko01100//Metabolic pathways+ko01110//Biosynthesis of secondary metabolites	PREDICTED: cytochrome P450 724B1-like [Daucus carota subsp. sativus] >XP_017258411.1 PREDICTED: cytochrome P450 724B1-like [Daucus carota subsp. sativus] >KZM90894.1 hypothetical protein DCAR_021741 [Daucus carota subsp. sativus]	3-epi-6-deoxocathasterone 23-monooxygenase OS=Arabidopsis thaliana GN=ROT3 PE=2 SV=3		[QI] KOG0157 Cytochrome P450 CYP4/CYP19/CYP26 subfamilies
CL10052.Contig1_All	K01381//saccharopepsin [EC:3.4.23.25];K01379//cathepsin D [EC:3.4.23.5]	PREDICTED: aspartyl protease AED3-like [Daucus carota subsp. sativus] >KZM82130.1 hypothetical protein DCAR_031837 [Daucus carota subsp. sativus]	Aspartyl protease AED3 OS=Arabidopsis thaliana GN=AED3 PE=1 SV=1		[O] KOG1339 Aspartyl protease
CL10052.Contig2_All	K01381//saccharopepsin [EC:3.4.23.25];K01379//cathepsin D [EC:3.4.23.5]	PREDICTED: aspartyl protease AED3-like [Daucus carota subsp. sativus] >KZM82130.1 hypothetical protein DCAR_031837 [Daucus carota subsp. sativus]	Aspartyl protease AED3 OS=Arabidopsis thaliana GN=AED3 PE=1 SV=1	Xylanase inhibitor C-terminal	[O] KOG1339 Aspartyl protease
CL10053.Contig1_All	K15153//mediator of RNA polymerase II transcription subunit 31	PREDICTED: mediator of RNA polymerase II transcription subunit 31 [Daucus carota subsp. sativus] >KZM97991.1 hypothetical protein DCAR_014647 [Daucus carota subsp. sativus]	Mediator of RNA polymerase II transcription subunit 31 OS=Arabidopsis thaliana GN=MED31 PE=1 SV=1		[KL] KOG4086 Transcriptional regulator SOH1
CL10053.Contig2_All	K15153//mediator of RNA polymerase II transcription subunit 31	PREDICTED: mediator of RNA polymerase II transcription subunit 31 [Daucus carota subsp. sativus] >KZM97991.1 hypothetical protein DCAR_014647 [Daucus carota subsp. sativus]	Mediator of RNA polymerase II transcription subunit 31 OS=Arabidopsis thaliana GN=MED31 PE=1 SV=1	SOH1	[KL] KOG4086 Transcriptional regulator SOH1
CL10055.Contig1_All	K22389//phospholipase A1 [EC:3.1.1.32]+ko00592//alpha-Linolenic acid metabolism+ko01100//Metabolic pathways+ko01110//Biosynthesis of secondary metabolites+ko00564//Glycerophospholipid metabolism	PREDICTED: lecithin-cholesterol acyltransferase-like 4 [Daucus carota subsp. sativus]	Lecithin-cholesterol acyltransferase-like 4 OS=Arabidopsis thaliana GN=LCAT4 PE=1 SV=1	Voltage-dependent anion channel	[I] KOG2369 Lecithin:cholesterol acyltransferase (LCAT)/Acyl-ceramide synthase
CL10055.Contig2_All	K22389//phospholipase A1 [EC:3.1.1.32]+ko00592//alpha-Linolenic acid metabolism+ko01100//Metabolic pathways+ko01110//Biosynthesis of secondary metabolites+ko00564//Glycerophospholipid metabolism	PREDICTED: lecithin-cholesterol acyltransferase-like 4 [Daucus carota subsp. sativus]	Lecithin-cholesterol acyltransferase-like 4 OS=Arabidopsis thaliana GN=LCAT4 PE=1 SV=1	Lecithin:cholesterol acyltransferase	[I] KOG2369 Lecithin:cholesterol acyltransferase (LCAT)/Acyl-ceramide synthase
CL10055.Contig3_All	K22389//phospholipase A1 [EC:3.1.1.32]+ko00592//alpha-Linolenic acid metabolism+ko01100//Metabolic pathways+ko01110//Biosynthesis of secondary metabolites+ko00564//Glycerophospholipid metabolism	PREDICTED: lecithin-cholesterol acyltransferase-like 4 [Daucus carota subsp. sativus]	Lecithin-cholesterol acyltransferase-like 4 OS=Arabidopsis thaliana GN=LCAT4 PE=1 SV=1	Lecithin:cholesterol acyltransferase	[I] KOG2369 Lecithin:cholesterol acyltransferase (LCAT)/Acyl-ceramide synthase
CL10056.Contig1_All	K11108//RNA 3'-terminal phosphate cyclase-like protein+ko03008//Ribosome biogenesis in eukaryotes	PREDICTED: LOW QUALITY PROTEIN: probable RNA 3'-terminal phosphate cyclase-like protein [Daucus carota subsp. sativus]	Probable RNA 3'-terminal phosphate cyclase-like protein OS=Arabidopsis thaliana GN=At5g22100 PE=2 SV=1	RNA 3'-terminal phosphate cyclase (RTC), insert domain	[A] KOG3980 RNA 3'-terminal phosphate cyclase
CL10056.Contig2_All	K11108//RNA 3'-terminal phosphate cyclase-like protein+ko03008//Ribosome biogenesis in eukaryotes	PREDICTED: LOW QUALITY PROTEIN: probable RNA 3'-terminal phosphate cyclase-like protein [Daucus carota subsp. sativus]	Probable RNA 3'-terminal phosphate cyclase-like protein OS=Arabidopsis thaliana GN=At5g22100 PE=2 SV=1	RNA 3'-terminal phosphate cyclase	[A] KOG3980 RNA 3'-terminal phosphate cyclase
CL10057.Contig1_All	K08057//calreticulin+ko04145//Phagosome+ko04141//Protein processing in endoplasmic reticulum	calreticulin [Medicago truncatula] >AES61463.1 calreticulin [Medicago truncatula] >AFK40325.1 unknown [Medicago truncatula]	Calreticulin OS=Ricinus communis PE=2 SV=1	Calreticulin family	[O] KOG0674 Calreticulin
CL10057.Contig2_All	K08057//calreticulin+ko04145//Phagosome+ko04141//Protein processing in endoplasmic reticulum	calreticulin [Medicago truncatula] >AES61463.1 calreticulin [Medicago truncatula] >AFK40325.1 unknown [Medicago truncatula]	Calreticulin OS=Ricinus communis PE=2 SV=1	Calreticulin family	[O] KOG0674 Calreticulin
CL10057.Contig3_All	K08057//calreticulin+ko04145//Phagosome+ko04141//Protein processing in endoplasmic reticulum	calreticulin [Medicago truncatula] >AES61463.1 calreticulin [Medicago truncatula] >AFK40325.1 unknown [Medicago truncatula]	Calreticulin OS=Ricinus communis PE=2 SV=1	Calreticulin family	[O] KOG0674 Calreticulin
CL10057.Contig4_All	K08057//calreticulin+ko04145//Phagosome+ko04141//Protein processing in endoplasmic reticulum	PREDICTED: calreticulin [Vigna radiata var. radiata]	Calreticulin OS=Beta vulgaris PE=2 SV=1	Calreticulin family	[O] KOG0674 Calreticulin
CL10057.Contig5_All	K08057//calreticulin+ko04145//Phagosome+ko04141//Protein processing in endoplasmic reticulum	PREDICTED: calreticulin [Daucus carota subsp. sativus] >KZM88199.1 hypothetical protein DCAR_025274 [Daucus carota subsp. sativus]	Calreticulin OS=Beta vulgaris PE=2 SV=1	Calreticulin family	[O] KOG0674 Calreticulin
CL10058.Contig1_All
CL10059.Contig1_All		PREDICTED: uncharacterized protein LOC108217971 [Daucus carota subsp. sativus]		Inner membrane component domain
CL10059.Contig2_All		PREDICTED: uncharacterized protein LOC108217971 [Daucus carota subsp. sativus]
CL1006.Contig1_All	K01807//ribose 5-phosphate isomerase A [EC:5.3.1.6]+ko00030//Pentose phosphate pathway+ko01230//Biosynthesis of amino acids+ko01100//Metabolic pathways+ko01110//Biosynthesis of secondary metabolites+ko00710//Carbon fixation in photosynthetic organisms+ko01200//Carbon metabolism;K07478//putative ATPase;K02218//casein kinase 1 [EC:2.7.11.1];K14318//nuclear pore complex protein Nup88+ko03013//RNA tr…	PREDICTED: uncharacterized protein LOC108205943 isoform X1 [Daucus carota subsp. sativus]	Protein ALP1-like OS=Arabidopsis thaliana GN=At3g55350 PE=2 SV=1	DDE superfamily endonuclease	[L] KOG4585 Predicted transposase
CL1006.Contig2_All	K01807//ribose 5-phosphate isomerase A [EC:5.3.1.6]+ko00030//Pentose phosphate pathway+ko01230//Biosynthesis of amino acids+ko01100//Metabolic pathways+ko01110//Biosynthesis of secondary metabolites+ko00710//Carbon fixation in photosynthetic organisms+ko01200//Carbon metabolism;K07478//putative ATPase;K02218//casein kinase 1 [EC:2.7.11.1];K14318//nuclear pore complex protein Nup88+ko03013//RNA tr…	PREDICTED: uncharacterized protein LOC108205943 isoform X1 [Daucus carota subsp. sativus]	Protein ALP1-like OS=Arabidopsis thaliana GN=At3g55350 PE=2 SV=1	DDE superfamily endonuclease	[L] KOG4585 Predicted transposase
CL1006.Contig3_All	K01807//ribose 5-phosphate isomerase A [EC:5.3.1.6]+ko00030//Pentose phosphate pathway+ko01230//Biosynthesis of amino acids+ko01100//Metabolic pathways+ko01110//Biosynthesis of secondary metabolites+ko00710//Carbon fixation in photosynthetic organisms+ko01200//Carbon metabolism;K02218//casein kinase 1 [EC:2.7.11.1];K07478//putative ATPase;K14318//nuclear pore complex protein Nup88+ko03013//RNA tr…	PREDICTED: uncharacterized protein LOC108205943 isoform X1 [Daucus carota subsp. sativus]	Protein ALP1-like OS=Arabidopsis thaliana GN=At3g55350 PE=2 SV=1	DDE superfamily endonuclease	[L] KOG4585 Predicted transposase
CL1006.Contig4_All		PREDICTED: uncharacterized protein LOC108205943 isoform X1 [Daucus carota subsp. sativus]
CL1006.Contig5_All	K01807//ribose 5-phosphate isomerase A [EC:5.3.1.6]+ko00030//Pentose phosphate pathway+ko01230//Biosynthesis of amino acids+ko01100//Metabolic pathways+ko01110//Biosynthesis of secondary metabolites+ko00710//Carbon fixation in photosynthetic organisms+ko01200//Carbon metabolism;K07478//putative ATPase;K02218//casein kinase 1 [EC:2.7.11.1]	PREDICTED: uncharacterized protein LOC108205943 isoform X2 [Daucus carota subsp. sativus] >XP_017231567.1 PREDICTED: uncharacterized protein LOC108205943 isoform X2 [Daucus carota subsp. sativus] >KZN07522.1 hypothetical protein DCAR_008359 [Daucus carota subsp. sativus]		Myb/SANT-like DNA-binding domain	[L] KOG4585 Predicted transposase
CL1006.Contig6_All	K01807//ribose 5-phosphate isomerase A [EC:5.3.1.6]+ko00030//Pentose phosphate pathway+ko01230//Biosynthesis of amino acids+ko01100//Metabolic pathways+ko01110//Biosynthesis of secondary metabolites+ko00710//Carbon fixation in photosynthetic organisms+ko01200//Carbon metabolism;K07478//putative ATPase;K02218//casein kinase 1 [EC:2.7.11.1]	hypothetical protein DCAR_006524 [Daucus carota subsp. sativus]	F-box protein SKIP8 OS=Arabidopsis thaliana GN=SKIP8 PE=1 SV=1	SnoaL-like domain	[L] KOG4585 Predicted transposase
CL1006.Contig7_All	K01807//ribose 5-phosphate isomerase A [EC:5.3.1.6]+ko00030//Pentose phosphate pathway+ko01230//Biosynthesis of amino acids+ko01100//Metabolic pathways+ko01110//Biosynthesis of secondary metabolites+ko00710//Carbon fixation in photosynthetic organisms+ko01200//Carbon metabolism;K02218//casein kinase 1 [EC:2.7.11.1];K07478//putative ATPase;K14318//nuclear pore complex protein Nup88+ko03013//RNA tr…	PREDICTED: uncharacterized protein LOC108205943 isoform X1 [Daucus carota subsp. sativus]	F-box protein SKIP8 OS=Arabidopsis thaliana GN=SKIP8 PE=1 SV=1	SnoaL-like domain	[L] KOG4585 Predicted transposase
CL10060.Contig1_All		PREDICTED: uncharacterized protein LOC108193397 [Daucus carota subsp. sativus] >XP_017215509.1 PREDICTED: uncharacterized protein LOC108193397 [Daucus carota subsp. sativus] >XP_017215510.1 PREDICTED: uncharacterized protein LOC108193397 [Daucus carota subsp. sativus] >XP_017215511.1 PREDICTED: uncharacterized protein LOC108193397 [Daucus carota subsp. sativus] >XP_017218590.1 PREDICTED: uncharac…
CL10060.Contig2_All		PREDICTED: uncharacterized protein LOC108193397 [Daucus carota subsp. sativus] >XP_017215509.1 PREDICTED: uncharacterized protein LOC108193397 [Daucus carota subsp. sativus] >XP_017215510.1 PREDICTED: uncharacterized protein LOC108193397 [Daucus carota subsp. sativus] >XP_017215511.1 PREDICTED: uncharacterized protein LOC108193397 [Daucus carota subsp. sativus] >XP_017218590.1 PREDICTED: uncharac…
CL10063.Contig1_All
CL10063.Contig2_All	K01307//gamma-glutamyl hydrolase [EC:3.4.19.9]+ko00790//Folate biosynthesis	PREDICTED: gamma-glutamyl hydrolase 2-like [Daucus carota subsp. sativus] >KZM96362.1 hypothetical protein DCAR_019604 [Daucus carota subsp. sativus]	Gamma-glutamyl hydrolase 1 OS=Arabidopsis thaliana GN=GGH1 PE=2 SV=1	Peptidase C26	[H] KOG1559 Gamma-glutamyl hydrolase
CL10063.Contig3_All	K01307//gamma-glutamyl hydrolase [EC:3.4.19.9]+ko00790//Folate biosynthesis	PREDICTED: gamma-glutamyl hydrolase 2-like [Daucus carota subsp. sativus] >KZM96362.1 hypothetical protein DCAR_019604 [Daucus carota subsp. sativus]	Gamma-glutamyl hydrolase 1 OS=Arabidopsis thaliana GN=GGH1 PE=2 SV=1	Peptidase C26	[H] KOG1559 Gamma-glutamyl hydrolase
CL10064.Contig1_All		PREDICTED: uncharacterized protein LOC108214347 isoform X2 [Daucus carota subsp. sativus]		RNAPII transcription regulator C-terminal
CL10064.Contig2_All		PREDICTED: uncharacterized protein LOC108214347 isoform X2 [Daucus carota subsp. sativus]		RNAPII transcription regulator C-terminal
CL10064.Contig3_All		PREDICTED: uncharacterized protein LOC108214347 isoform X1 [Daucus carota subsp. sativus]
CL10064.Contig4_All		PREDICTED: uncharacterized protein LOC108214347 isoform X1 [Daucus carota subsp. sativus]		Death effector domain
CL10064.Contig5_All		PREDICTED: uncharacterized protein LOC108214347 isoform X1 [Daucus carota subsp. sativus]		Interferon-related developmental regulator (IFRD)
CL10064.Contig6_All		PREDICTED: uncharacterized protein LOC108214347 isoform X1 [Daucus carota subsp. sativus]		RNAPII transcription regulator C-terminal
CL10064.Contig7_All		PREDICTED: uncharacterized protein LOC108214347 isoform X2 [Daucus carota subsp. sativus]		Interferon-related developmental regulator (IFRD)
CL10067.Contig1_All	K18626//trichohyalin;K12821//pre-mRNA-processing factor 40+ko03040//Spliceosome	PREDICTED: uncharacterized protein LOC108218631 [Daucus carota subsp. sativus]	MATH domain-containing protein At5g43560 OS=Arabidopsis thaliana GN=At5g43560 PE=1 SV=1	Domain of unknown function	[G] KOG2806 Chitinase
CL10067.Contig2_All	K18626//trichohyalin;K12821//pre-mRNA-processing factor 40+ko03040//Spliceosome	PREDICTED: uncharacterized protein LOC108218631 [Daucus carota subsp. sativus]	MATH domain-containing protein At5g43560 OS=Arabidopsis thaliana GN=At5g43560 PE=1 SV=1	NMDA receptor-regulated protein 1	[G] KOG2806 Chitinase
CL10068.Contig1_All	K15283//solute carrier family 35, member E1	Drug/metabolite transporter [Macleaya cordata]	Glucose-6-phosphate/phosphate translocator 1, chloroplastic OS=Arabidopsis thaliana GN=GPT1 PE=2 SV=1		[GE] KOG1441 Glucose-6-phosphate/phosphate and phosphoenolpyruvate/phosphate antiporter
CL10068.Contig2_All	K15283//solute carrier family 35, member E1	PREDICTED: glucose-6-phosphate/phosphate translocator 1, chloroplastic isoform X1 [Daucus carota subsp. sativus]	Glucose-6-phosphate/phosphate translocator 1, chloroplastic OS=Arabidopsis thaliana GN=GPT1 PE=2 SV=1	Triose-phosphate Transporter family	[GE] KOG1441 Glucose-6-phosphate/phosphate and phosphoenolpyruvate/phosphate antiporter
CL10068.Contig3_All	K15283//solute carrier family 35, member E1	PREDICTED: glucose-6-phosphate/phosphate translocator 1, chloroplastic isoform X1 [Daucus carota subsp. sativus]	Glucose-6-phosphate/phosphate translocator 1, chloroplastic OS=Arabidopsis thaliana GN=GPT1 PE=2 SV=1	Triose-phosphate Transporter family	[GE] KOG1441 Glucose-6-phosphate/phosphate and phosphoenolpyruvate/phosphate antiporter
CL1007.Contig10_All	K04733//interleukin-1 receptor-associated kinase 4 [EC:2.7.11.1]	PREDICTED: cysteine-rich receptor-like protein kinase 10 isoform X1 [Daucus carota subsp. sativus]	G-type lectin S-receptor-like serine/threonine-protein kinase At1g61500 OS=Arabidopsis thaliana GN=At1g61500 PE=2 SV=2	Protein tyrosine kinase	[T] KOG1187 Serine/threonine protein kinase
CL1007.Contig11_All	K04733//interleukin-1 receptor-associated kinase 4 [EC:2.7.11.1]	PREDICTED: cysteine-rich receptor-like protein kinase 10 isoform X1 [Daucus carota subsp. sativus]	G-type lectin S-receptor-like serine/threonine-protein kinase At1g61500 OS=Arabidopsis thaliana GN=At1g61500 PE=2 SV=2	Protein tyrosine kinase	[T] KOG1187 Serine/threonine protein kinase
CL1007.Contig1_All	K04733//interleukin-1 receptor-associated kinase 4 [EC:2.7.11.1]	PREDICTED: cysteine-rich receptor-like protein kinase 10 isoform X1 [Daucus carota subsp. sativus]	Cysteine-rich receptor-like protein kinase 10 OS=Arabidopsis thaliana GN=CRK10 PE=1 SV=3	Protein tyrosine kinase	[T] KOG1187 Serine/threonine protein kinase
CL1007.Contig2_All	K04733//interleukin-1 receptor-associated kinase 4 [EC:2.7.11.1]	PREDICTED: cysteine-rich receptor-like protein kinase 10 isoform X2 [Daucus carota subsp. sativus]	Cysteine-rich receptor-like protein kinase 10 OS=Arabidopsis thaliana GN=CRK10 PE=1 SV=3	Protein tyrosine kinase	[T] KOG1187 Serine/threonine protein kinase
CL1007.Contig3_All	K04733//interleukin-1 receptor-associated kinase 4 [EC:2.7.11.1]	PREDICTED: cysteine-rich receptor-like protein kinase 10 isoform X1 [Daucus carota subsp. sativus]	G-type lectin S-receptor-like serine/threonine-protein kinase At1g67520 OS=Arabidopsis thaliana GN=At1g67520 PE=2 SV=3		[T] KOG1187 Serine/threonine protein kinase
CL1007.Contig4_All	K04733//interleukin-1 receptor-associated kinase 4 [EC:2.7.11.1]	PREDICTED: putative receptor-like protein kinase At4g00960 [Ipomoea nil]	Cysteine-rich receptor-like protein kinase 10 OS=Arabidopsis thaliana GN=CRK10 PE=1 SV=3	Protein tyrosine kinase	[T] KOG1187 Serine/threonine protein kinase
CL1007.Contig5_All	K04733//interleukin-1 receptor-associated kinase 4 [EC:2.7.11.1]	PREDICTED: putative receptor-like protein kinase At4g00960 [Ipomoea nil]	Cysteine-rich receptor-like protein kinase 10 OS=Arabidopsis thaliana GN=CRK10 PE=1 SV=3	Protein tyrosine kinase	[T] KOG1187 Serine/threonine protein kinase
CL1007.Contig6_All	K04733//interleukin-1 receptor-associated kinase 4 [EC:2.7.11.1]	PREDICTED: cysteine-rich receptor-like protein kinase 10 [Vitis vinifera] >CBI26866.3 unnamed protein product, partial [Vitis vinifera]	Cysteine-rich receptor-like protein kinase 10 OS=Arabidopsis thaliana GN=CRK10 PE=1 SV=3	Protein tyrosine kinase	[T] KOG1187 Serine/threonine protein kinase
CL1007.Contig7_All	K04733//interleukin-1 receptor-associated kinase 4 [EC:2.7.11.1]	PREDICTED: putative receptor-like protein kinase At4g00960 [Ziziphus jujuba]	Cysteine-rich receptor-like protein kinase 10 OS=Arabidopsis thaliana GN=CRK10 PE=1 SV=3	Protein tyrosine kinase	[T] KOG1187 Serine/threonine protein kinase
CL1007.Contig8_All	K04733//interleukin-1 receptor-associated kinase 4 [EC:2.7.11.1]	PREDICTED: putative receptor-like protein kinase At4g00960 [Ziziphus jujuba]	Cysteine-rich receptor-like protein kinase 10 OS=Arabidopsis thaliana GN=CRK10 PE=1 SV=3	Protein tyrosine kinase	[T] KOG1187 Serine/threonine protein kinase
CL1007.Contig9_All	K04733//interleukin-1 receptor-associated kinase 4 [EC:2.7.11.1]	PREDICTED: putative receptor-like protein kinase At4g00960 [Ziziphus jujuba]	Cysteine-rich receptor-like protein kinase 10 OS=Arabidopsis thaliana GN=CRK10 PE=1 SV=3	Protein tyrosine kinase	[T] KOG1187 Serine/threonine protein kinase
CL10070.Contig1_All	K03869//cullin 3+ko04120//Ubiquitin mediated proteolysis	PREDICTED: cullin-3A-like [Daucus carota subsp. sativus] >XP_017242242.1 PREDICTED: cullin-3A-like [Daucus carota subsp. sativus]	Cullin-3A OS=Arabidopsis thaliana GN=CUL3A PE=1 SV=1	Cullin family	[D] KOG2166 Cullins
CL10070.Contig2_All	K03869//cullin 3+ko04120//Ubiquitin mediated proteolysis	PREDICTED: cullin-3A-like [Daucus carota subsp. sativus] >XP_017242242.1 PREDICTED: cullin-3A-like [Daucus carota subsp. sativus]	Cullin-3A OS=Arabidopsis thaliana GN=CUL3A PE=1 SV=1	Cullin family	[D] KOG2166 Cullins
CL10072.Contig1_All	K00876//uridine kinase [EC:2.7.1.48]+ko01100//Metabolic pathways+ko00240//Pyrimidine metabolism	PREDICTED: uridine-cytidine kinase C-like isoform X2 [Daucus carota subsp. sativus]
CL10072.Contig2_All	K00876//uridine kinase [EC:2.7.1.48]+ko01100//Metabolic pathways+ko00240//Pyrimidine metabolism	PREDICTED: uridine-cytidine kinase C-like isoform X1 [Daucus carota subsp. sativus]	Uridine kinase-like protein 4 OS=Arabidopsis thaliana GN=UKL4 PE=2 SV=2	Phosphoribulokinase / Uridine kinase family	[TZ] KOG4203 Armadillo/beta-Catenin/plakoglobin
CL10073.Contig1_All	K12833//pre-mRNA branch site protein p14+ko03040//Spliceosome	PREDICTED: uncharacterized protein LOC108215689 [Daucus carota subsp. sativus] >KZM98376.1 hypothetical protein DCAR_014262 [Daucus carota subsp. sativus]
CL10073.Contig2_All	K12833//pre-mRNA branch site protein p14+ko03040//Spliceosome	PREDICTED: uncharacterized protein LOC108215689 [Daucus carota subsp. sativus] >KZM98376.1 hypothetical protein DCAR_014262 [Daucus carota subsp. sativus]
CL10075.Contig2_All	K03006//DNA-directed RNA polymerase II subunit RPB1 [EC:2.7.7.6]+ko00230//Purine metabolism+ko03020//RNA polymerase+ko01100//Metabolic pathways+ko00240//Pyrimidine metabolism	hypothetical protein CICLE_v10005954mg [Citrus clementina] >ESR32681.1 hypothetical protein CICLE_v10005954mg [Citrus clementina]	Leucine-rich repeat extensin-like protein 3 OS=Arabidopsis thaliana GN=LRX3 PE=1 SV=1		[M] LSE0601 A Pollen extensin-like protein (Pex)
CL10076.Contig1_All		PREDICTED: chitinase 2-like [Daucus carota subsp. sativus] >KZM97059.1 hypothetical protein DCAR_015579 [Daucus carota subsp. sativus]	Chitinase 2 OS=Tulipa bakeri PE=1 SV=1	Glycosyl hydrolases family 18
CL10076.Contig2_All		PREDICTED: chitinase 2-like [Daucus carota subsp. sativus] >KZM97059.1 hypothetical protein DCAR_015579 [Daucus carota subsp. sativus]	Chitinase 2 OS=Tulipa bakeri PE=1 SV=1	Glycosyl hydrolases family 18
CL10077.Contig1_All	K10643//CCR4-NOT transcription complex subunit 4 [EC:2.3.2.27]+ko03018//RNA degradation	PREDICTED: uncharacterized protein LOC108214170 [Daucus carota subsp. sativus] >KZN02430.1 hypothetical protein DCAR_011184 [Daucus carota subsp. sativus]		RING/Ubox like zinc-binding domain	[K] KOG2068 MOT2 transcription factor
CL10077.Contig2_All	K10643//CCR4-NOT transcription complex subunit 4 [EC:2.3.2.27]+ko03018//RNA degradation	PREDICTED: uncharacterized protein LOC108214170 [Daucus carota subsp. sativus] >KZN02430.1 hypothetical protein DCAR_011184 [Daucus carota subsp. sativus]		RING/Ubox like zinc-binding domain	[K] KOG2068 MOT2 transcription factor
CL10077.Contig3_All	K10643//CCR4-NOT transcription complex subunit 4 [EC:2.3.2.27]+ko03018//RNA degradation	PREDICTED: uncharacterized protein LOC108212589 [Daucus carota subsp. sativus]		RING/Ubox like zinc-binding domain	[K] KOG2068 MOT2 transcription factor
CL10078.Contig1_All	K15104//solute carrier family 25 (mitochondrial oxoglutarate transporter), member 11	PREDICTED: mitochondrial dicarboxylate/tricarboxylate transporter DTC [Theobroma cacao] >EOY32281.1 Mitochondrial substrate carrier family protein [Theobroma cacao]
CL10078.Contig2_All	K15104//solute carrier family 25 (mitochondrial oxoglutarate transporter), member 11	PREDICTED: mitochondrial dicarboxylate/tricarboxylate transporter DTC [Nelumbo nucifera]	Mitochondrial dicarboxylate/tricarboxylate transporter DTC OS=Arabidopsis thaliana GN=DTC PE=1 SV=1	Mitochondrial carrier protein	[C] KOG0759 Mitochondrial oxoglutarate/malate carrier proteins
CL10079.Contig1_All	K05291//phosphatidylinositol glycan, class S+ko01100//Metabolic pathways+ko00563//Glycosylphosphatidylinositol (GPI)-anchor biosynthesis	PREDICTED: GPI transamidase component PIG-S-like [Daucus carota subsp. sativus]		Phosphatidylinositol-glycan biosynthesis class S protein	[MO] KOG2459 GPI transamidase complex, GPI17/PIG-S component, involved in glycosylphosphatidylinositol anchor biosynthesis
CL10079.Contig2_All	K05291//phosphatidylinositol glycan, class S+ko01100//Metabolic pathways+ko00563//Glycosylphosphatidylinositol (GPI)-anchor biosynthesis	PREDICTED: GPI transamidase component PIG-S-like isoform X1 [Daucus carota subsp. sativus]		Phosphatidylinositol-glycan biosynthesis class S protein	[MO] KOG2459 GPI transamidase complex, GPI17/PIG-S component, involved in glycosylphosphatidylinositol anchor biosynthesis
CL10079.Contig3_All	K05291//phosphatidylinositol glycan, class S+ko01100//Metabolic pathways+ko00563//Glycosylphosphatidylinositol (GPI)-anchor biosynthesis	PREDICTED: GPI transamidase component PIG-S-like [Daucus carota subsp. sativus]		Phosphatidylinositol-glycan biosynthesis class S protein	[MO] KOG2459 GPI transamidase complex, GPI17/PIG-S component, involved in glycosylphosphatidylinositol anchor biosynthesis
CL10079.Contig4_All	K05291//phosphatidylinositol glycan, class S+ko01100//Metabolic pathways+ko00563//Glycosylphosphatidylinositol (GPI)-anchor biosynthesis	PREDICTED: GPI transamidase component PIG-S-like isoform X2 [Daucus carota subsp. sativus]		Phosphatidylinositol-glycan biosynthesis class S protein	[MO] KOG2459 GPI transamidase complex, GPI17/PIG-S component, involved in glycosylphosphatidylinositol anchor biosynthesis
CL1008.Contig1_All		PREDICTED: uncharacterized protein LOC108206691 [Daucus carota subsp. sativus]		Plant transposase (Ptta/En/Spm family)
CL1008.Contig2_All		PREDICTED: uncharacterized protein LOC108206691 [Daucus carota subsp. sativus]		Plant transposase (Ptta/En/Spm family)
CL1008.Contig3_All		PREDICTED: uncharacterized protein LOC108206691 [Daucus carota subsp. sativus]
CL1008.Contig4_All		hypothetical protein DCAR_008013 [Daucus carota subsp. sativus]
CL10080.Contig1_All		PREDICTED: hippocampus abundant transcript 1 protein-like [Daucus carota subsp. sativus] >XP_017248251.1 PREDICTED: hippocampus abundant transcript 1 protein-like [Daucus carota subsp. sativus]		Major Facilitator Superfamily	[R] KOG2816 Predicted transporter ADD1 (major facilitator superfamily)
CL10080.Contig2_All		PREDICTED: hippocampus abundant transcript 1 protein-like [Daucus carota subsp. sativus] >XP_017248251.1 PREDICTED: hippocampus abundant transcript 1 protein-like [Daucus carota subsp. sativus]		Major Facilitator Superfamily	[R] KOG2816 Predicted transporter ADD1 (major facilitator superfamily)
CL10081.Contig1_All	K11323//histone arginine demethylase JMJD6 [EC:1.14.11.-]	PREDICTED: RNA-directed DNA methylation 4 isoform X1 [Daucus carota subsp. sativus]	RNA-directed DNA methylation 4 OS=Arabidopsis thaliana GN=RDM4 PE=1 SV=1	Transcription factor Iwr1	[S] KOG3854 SPRT-like metalloprotease
CL10081.Contig2_All	K11323//histone arginine demethylase JMJD6 [EC:1.14.11.-]	PREDICTED: RNA-directed DNA methylation 4 isoform X1 [Daucus carota subsp. sativus]	RNA-directed DNA methylation 4 OS=Arabidopsis thaliana GN=RDM4 PE=1 SV=1	Transcription factor Iwr1	[M] KOG4701 Chitinase
CL10081.Contig3_All	K11323//histone arginine demethylase JMJD6 [EC:1.14.11.-]	PREDICTED: RNA-directed DNA methylation 4 isoform X1 [Daucus carota subsp. sativus]	RNA-directed DNA methylation 4 OS=Arabidopsis thaliana GN=RDM4 PE=1 SV=1	Transcription factor Iwr1	[S] KOG3854 SPRT-like metalloprotease
CL10081.Contig4_All	K11323//histone arginine demethylase JMJD6 [EC:1.14.11.-]	PREDICTED: RNA-directed DNA methylation 4 isoform X1 [Daucus carota subsp. sativus]	RNA-directed DNA methylation 4 OS=Arabidopsis thaliana GN=RDM4 PE=1 SV=1	Transcription factor Iwr1	[M] KOG4701 Chitinase
CL10082.Contig1_All	K03549//KUP system potassium uptake protein	hypothetical protein DCAR_008069 [Daucus carota subsp. sativus]		WD domain, G-beta repeat	[R] KOG2919 Guanine nucleotide-binding protein
CL10082.Contig2_All	K03549//KUP system potassium uptake protein	hypothetical protein DCAR_008069 [Daucus carota subsp. sativus]			[R] KOG2919 Guanine nucleotide-binding protein
CL10082.Contig3_All	K18643//katanin p80 WD40 repeat-containing subunit B1	PREDICTED: telomerase Cajal body protein 1 isoform X1 [Daucus carota subsp. sativus]		WD domain, G-beta repeat	[R] KOG2919 Guanine nucleotide-binding protein
CL10082.Contig4_All		hypothetical protein DCAR_008069 [Daucus carota subsp. sativus]			[R] KOG2919 Guanine nucleotide-binding protein
CL10083.Contig1_All	K01593//aromatic-L-amino-acid/L-tryptophan decarboxylase [EC:4.1.1.28 4.1.1.105]+ko00380//Tryptophan metabolism+ko00901//Indole alkaloid biosynthesis+ko00965//Betalain biosynthesis+ko00350//Tyrosine metabolism+ko01100//Metabolic pathways+ko00950//Isoquinoline alkaloid biosynthesis+ko01110//Biosynthesis of secondary metabolites+ko00360//Phenylalanine metabolism	PREDICTED: tyrosine decarboxylase 1 isoform X2 [Nicotiana attenuata] >OIT32480.1 tyrosine decarboxylase 1 [Nicotiana attenuata]	Tyrosine decarboxylase 1 OS=Arabidopsis thaliana GN=ELI5 PE=2 SV=1	Pyridoxal-dependent decarboxylase conserved domain	[E] KOG0628 Aromatic-L-amino-acid/L-histidine decarboxylase
CL10083.Contig2_All	K01593//aromatic-L-amino-acid/L-tryptophan decarboxylase [EC:4.1.1.28 4.1.1.105]+ko00380//Tryptophan metabolism+ko00901//Indole alkaloid biosynthesis+ko00965//Betalain biosynthesis+ko00350//Tyrosine metabolism+ko01100//Metabolic pathways+ko00950//Isoquinoline alkaloid biosynthesis+ko01110//Biosynthesis of secondary metabolites+ko00360//Phenylalanine metabolism	PREDICTED: tyrosine decarboxylase 1 isoform X1 [Nicotiana attenuata]	Tyrosine decarboxylase 1 OS=Arabidopsis thaliana GN=ELI5 PE=2 SV=1	Pyridoxal-dependent decarboxylase conserved domain	[E] KOG0628 Aromatic-L-amino-acid/L-histidine decarboxylase
CL10083.Contig3_All	K01593//aromatic-L-amino-acid/L-tryptophan decarboxylase [EC:4.1.1.28 4.1.1.105]+ko00380//Tryptophan metabolism+ko00901//Indole alkaloid biosynthesis+ko00965//Betalain biosynthesis+ko00350//Tyrosine metabolism+ko01100//Metabolic pathways+ko00950//Isoquinoline alkaloid biosynthesis+ko01110//Biosynthesis of secondary metabolites+ko00360//Phenylalanine metabolism	PREDICTED: tyrosine decarboxylase 1 [Nicotiana tomentosiformis] >XP_009631404.1 PREDICTED: tyrosine decarboxylase 1 [Nicotiana tomentosiformis] >XP_018622046.1 PREDICTED: tyrosine decarboxylase 1 [Nicotiana tomentosiformis]	Tyrosine decarboxylase 1 OS=Arabidopsis thaliana GN=ELI5 PE=2 SV=1	Pyridoxal-dependent decarboxylase conserved domain	[E] KOG0628 Aromatic-L-amino-acid/L-histidine decarboxylase
CL10083.Contig4_All	K01593//aromatic-L-amino-acid/L-tryptophan decarboxylase [EC:4.1.1.28 4.1.1.105]+ko00380//Tryptophan metabolism+ko00901//Indole alkaloid biosynthesis+ko00965//Betalain biosynthesis+ko00350//Tyrosine metabolism+ko01100//Metabolic pathways+ko00950//Isoquinoline alkaloid biosynthesis+ko01110//Biosynthesis of secondary metabolites+ko00360//Phenylalanine metabolism	PREDICTED: tyrosine decarboxylase 1 [Daucus carota subsp. sativus] >KZN07903.1 hypothetical protein DCAR_000572 [Daucus carota subsp. sativus]	Tyrosine decarboxylase 1 OS=Arabidopsis thaliana GN=ELI5 PE=2 SV=1	Pyridoxal-dependent decarboxylase conserved domain	[E] KOG0628 Aromatic-L-amino-acid/L-histidine decarboxylase
CL10083.Contig5_All	K01593//aromatic-L-amino-acid/L-tryptophan decarboxylase [EC:4.1.1.28 4.1.1.105]+ko00380//Tryptophan metabolism+ko00901//Indole alkaloid biosynthesis+ko00965//Betalain biosynthesis+ko00350//Tyrosine metabolism+ko01100//Metabolic pathways+ko00950//Isoquinoline alkaloid biosynthesis+ko01110//Biosynthesis of secondary metabolites+ko00360//Phenylalanine metabolism	PREDICTED: tyrosine decarboxylase 1 [Daucus carota subsp. sativus] >KZN07903.1 hypothetical protein DCAR_000572 [Daucus carota subsp. sativus]	Tyrosine decarboxylase 1 OS=Arabidopsis thaliana GN=ELI5 PE=2 SV=1	Pyridoxal-dependent decarboxylase conserved domain	[E] KOG0628 Aromatic-L-amino-acid/L-histidine decarboxylase
CL10084.Contig1_All	K01054//acylglycerol lipase [EC:3.1.1.23]+ko01100//Metabolic pathways+ko00561//Glycerolipid metabolism	PREDICTED: monoglyceride lipase [Daucus carota subsp. sativus] >KZN06883.1 hypothetical protein DCAR_007720 [Daucus carota subsp. sativus]	Caffeoylshikimate esterase OS=Arabidopsis thaliana GN=CSE PE=1 SV=1	Serine aminopeptidase, S33	[I] KOG1455 Lysophospholipase
CL10084.Contig2_All	K01054//acylglycerol lipase [EC:3.1.1.23]+ko01100//Metabolic pathways+ko00561//Glycerolipid metabolism	PREDICTED: monoglyceride lipase [Daucus carota subsp. sativus] >KZN06883.1 hypothetical protein DCAR_007720 [Daucus carota subsp. sativus]	Caffeoylshikimate esterase OS=Arabidopsis thaliana GN=CSE PE=1 SV=1	Serine aminopeptidase, S33	[I] KOG1455 Lysophospholipase
CL10084.Contig3_All	K01054//acylglycerol lipase [EC:3.1.1.23]+ko01100//Metabolic pathways+ko00561//Glycerolipid metabolism	PREDICTED: monoglyceride lipase [Daucus carota subsp. sativus] >KZN06883.1 hypothetical protein DCAR_007720 [Daucus carota subsp. sativus]			[I] KOG1455 Lysophospholipase
CL10085.Contig1_All	K01179//endoglucanase [EC:3.2.1.4]+ko01100//Metabolic pathways+ko00500//Starch and sucrose metabolism	PREDICTED: endoglucanase 10 [Daucus carota subsp. sativus] >KZM98778.1 hypothetical protein DCAR_013860 [Daucus carota subsp. sativus]	Endoglucanase 10 OS=Arabidopsis thaliana GN=At1g75680 PE=2 SV=2	Glycosyl hydrolase family 9	[G] LSE0350 A Glycosyl hydrolase (endo-1, 4-beta-glucanase)
CL10085.Contig2_All	K01179//endoglucanase [EC:3.2.1.4]+ko01100//Metabolic pathways+ko00500//Starch and sucrose metabolism	PREDICTED: endoglucanase 10 [Daucus carota subsp. sativus] >KZM98778.1 hypothetical protein DCAR_013860 [Daucus carota subsp. sativus]	Endoglucanase 10 OS=Arabidopsis thaliana GN=At1g75680 PE=2 SV=2	Glycosyl hydrolase family 9	[G] LSE0350 A Glycosyl hydrolase (endo-1, 4-beta-glucanase)
CL10085.Contig3_All	K01179//endoglucanase [EC:3.2.1.4]+ko01100//Metabolic pathways+ko00500//Starch and sucrose metabolism	PREDICTED: endoglucanase 10 [Daucus carota subsp. sativus] >KZM98778.1 hypothetical protein DCAR_013860 [Daucus carota subsp. sativus]	Endoglucanase 10 OS=Arabidopsis thaliana GN=At1g75680 PE=2 SV=2	Glycosyl hydrolase family 9	[G] LSE0350 A Glycosyl hydrolase (endo-1, 4-beta-glucanase)
CL10085.Contig4_All	K01179//endoglucanase [EC:3.2.1.4]+ko01100//Metabolic pathways+ko00500//Starch and sucrose metabolism	PREDICTED: endoglucanase 10 [Daucus carota subsp. sativus] >KZM98778.1 hypothetical protein DCAR_013860 [Daucus carota subsp. sativus]	Endoglucanase 10 OS=Arabidopsis thaliana GN=At1g75680 PE=2 SV=2	Glycosyl hydrolase family 9	[G] LSE0350 A Glycosyl hydrolase (endo-1, 4-beta-glucanase)
CL10087.Contig1_All		PREDICTED: uncharacterized protein LOC105107551 [Populus euphratica]		PDDEXK-like family of unknown function	[S] LSE3615 A Uncharacterized protein
CL10087.Contig2_All		hypothetical protein POPTR_0002s07230g [Populus trichocarpa] >EEE80210.1 hypothetical protein POPTR_0002s07230g [Populus trichocarpa]			[S] LSE3615 A Uncharacterized protein
CL1009.Contig10_All	K11498//centromeric protein E	hypothetical protein TSUD_145260 [Trifolium subterraneum]	Kinesin-like protein KIN-7A OS=Arabidopsis thaliana GN=KIN7A PE=1 SV=1		[Z] KOG0242 Kinesin-like protein
CL1009.Contig11_All	K11498//centromeric protein E	PREDICTED: kinesin-like protein NACK1 [Daucus carota subsp. sativus]	Kinesin-like protein NACK1 OS=Nicotiana tabacum GN=NACK1 PE=1 SV=1		[Z] KOG0242 Kinesin-like protein
CL1009.Contig1_All	K11498//centromeric protein E	hypothetical protein TSUD_145260 [Trifolium subterraneum]	Kinesin-like protein KIN-7A OS=Arabidopsis thaliana GN=KIN7A PE=1 SV=1		[Z] KOG0242 Kinesin-like protein
CL1009.Contig2_All	K11498//centromeric protein E	PREDICTED: kinesin-like protein NACK1 [Daucus carota subsp. sativus] >KZM97485.1 hypothetical protein DCAR_015153 [Daucus carota subsp. sativus]	Kinesin-like protein KIN-7A OS=Arabidopsis thaliana GN=KIN7A PE=1 SV=1		[Z] KOG0242 Kinesin-like protein
CL1009.Contig3_All	K11498//centromeric protein E	hypothetical protein TSUD_145260 [Trifolium subterraneum]	Kinesin-like protein KIN-7A OS=Arabidopsis thaliana GN=KIN7A PE=1 SV=1		[Z] KOG0242 Kinesin-like protein
CL1009.Contig4_All	K11498//centromeric protein E	PREDICTED: kinesin-like protein NACK1 [Daucus carota subsp. sativus] >KZM97485.1 hypothetical protein DCAR_015153 [Daucus carota subsp. sativus]	Kinesin-like protein KIN-7A OS=Arabidopsis thaliana GN=KIN7A PE=1 SV=1		[Z] KOG0242 Kinesin-like protein
CL1009.Contig5_All	K11498//centromeric protein E	hypothetical protein TSUD_145260 [Trifolium subterraneum]	Kinesin-like protein KIN-7A OS=Arabidopsis thaliana GN=KIN7A PE=1 SV=1		[Z] KOG0242 Kinesin-like protein
CL1009.Contig6_All	K11498//centromeric protein E	PREDICTED: kinesin-like protein NACK1 [Daucus carota subsp. sativus]	Kinesin-like protein NACK1 OS=Nicotiana tabacum GN=NACK1 PE=1 SV=1		[Z] KOG0242 Kinesin-like protein
CL1009.Contig7_All	K11498//centromeric protein E	PREDICTED: kinesin-like protein NACK1 [Daucus carota subsp. sativus] >KZM97485.1 hypothetical protein DCAR_015153 [Daucus carota subsp. sativus]	Kinesin-like protein KIN-7A OS=Arabidopsis thaliana GN=KIN7A PE=1 SV=1		[Z] KOG0242 Kinesin-like protein
CL1009.Contig8_All	K11498//centromeric protein E	hypothetical protein TSUD_145260 [Trifolium subterraneum]	Kinesin-like protein KIN-7A OS=Arabidopsis thaliana GN=KIN7A PE=1 SV=1		[Z] KOG0242 Kinesin-like protein
CL1009.Contig9_All	K11498//centromeric protein E	PREDICTED: kinesin-like protein NACK1 [Daucus carota subsp. sativus] >KZM97485.1 hypothetical protein DCAR_015153 [Daucus carota subsp. sativus]	Kinesin-like protein KIN-7A OS=Arabidopsis thaliana GN=KIN7A PE=1 SV=1		[Z] KOG0242 Kinesin-like protein
CL10091.Contig1_All	K10268//F-box and leucine-rich repeat protein 2/20	PREDICTED: F-box protein SKIP17-like [Daucus carota subsp. sativus] >KZN10072.1 hypothetical protein DCAR_002728 [Daucus carota subsp. sativus]	F-box protein At4g02733 OS=Arabidopsis thaliana GN=At4g02733 PE=2 SV=1	F-box-like	[R] KOG4341 F-box protein containing LRR
CL10091.Contig2_All	K10268//F-box and leucine-rich repeat protein 2/20	PREDICTED: F-box protein SKIP17-like [Daucus carota subsp. sativus] >KZN10072.1 hypothetical protein DCAR_002728 [Daucus carota subsp. sativus]	F-box protein At4g02733 OS=Arabidopsis thaliana GN=At4g02733 PE=2 SV=1	F-box-like	[R] KOG4341 F-box protein containing LRR
CL10092.Contig1_All	K20222//importin-5	putative armadillo-like helical [Helianthus annuus]			[YU] KOG2171 Karyopherin (importin) beta 3
CL10092.Contig2_All	K20222//importin-5	importin-5-like [Helianthus annuus] >OTG35466.1 putative ARM repeat superfamily protein [Helianthus annuus]		HEAT repeats	[YU] KOG2171 Karyopherin (importin) beta 3
CL10092.Contig3_All	K20222//importin-5	PREDICTED: importin-5 [Daucus carota subsp. sativus]		HEAT-like repeat	[YU] KOG2171 Karyopherin (importin) beta 3
CL10092.Contig4_All	K20222//importin-5	PREDICTED: importin-5 [Vitis vinifera]		HEAT repeats	[YU] KOG2171 Karyopherin (importin) beta 3
CL10094.Contig1_All		PREDICTED: F-box protein At4g22390-like [Daucus carota subsp. sativus]	Putative F-box protein At3g16210 OS=Arabidopsis thaliana GN=At3g16210 PE=4 SV=1		[R] LSE0004 A F-box domain
CL10094.Contig2_All		PREDICTED: F-box protein At4g22390-like [Daucus carota subsp. sativus]
CL10095.Contig1_All	K22139//mitochondrial pyruvate carrier 2	PREDICTED: mitochondrial pyruvate carrier 4 [Daucus carota subsp. sativus]	Mitochondrial pyruvate carrier 4 OS=Arabidopsis thaliana GN=MPC4 PE=3 SV=1		[S] KOG1589 Uncharacterized conserved protein
CL10095.Contig2_All	K22139//mitochondrial pyruvate carrier 2	PREDICTED: mitochondrial pyruvate carrier 4-like isoform X1 [Daucus carota subsp. sativus] >XP_017230490.1 PREDICTED: mitochondrial pyruvate carrier 4-like isoform X1 [Daucus carota subsp. sativus]	Mitochondrial pyruvate carrier 4 OS=Arabidopsis thaliana GN=MPC4 PE=3 SV=1	Uncharacterised protein family (UPF0041)	[S] KOG1589 Uncharacterized conserved protein
CL10095.Contig3_All	K22139//mitochondrial pyruvate carrier 2	PREDICTED: mitochondrial pyruvate carrier 4-like isoform X1 [Daucus carota subsp. sativus] >XP_017230490.1 PREDICTED: mitochondrial pyruvate carrier 4-like isoform X1 [Daucus carota subsp. sativus]	Mitochondrial pyruvate carrier 4 OS=Arabidopsis thaliana GN=MPC4 PE=3 SV=1		[S] KOG1589 Uncharacterized conserved protein
CL10095.Contig4_All	K22139//mitochondrial pyruvate carrier 2	PREDICTED: mitochondrial pyruvate carrier 4 [Daucus carota subsp. sativus]	Mitochondrial pyruvate carrier 4 OS=Arabidopsis thaliana GN=MPC4 PE=3 SV=1		[S] KOG1589 Uncharacterized conserved protein
CL10096.Contig1_All	K04733//interleukin-1 receptor-associated kinase 4 [EC:2.7.11.1]	cell attachment protein in somatic embryogenesis [Daucus carota] >BAD72577.1 cell attachment protein in somatic embryogenesis [Daucus carota]	Epidermis-specific secreted glycoprotein EP1 OS=Daucus carota GN=EP1 PE=1 SV=1	D-mannose binding lectin	[R] LSE0276 A Bulb-type mannose-specific lectin domain
CL10096.Contig2_All	K04733//interleukin-1 receptor-associated kinase 4 [EC:2.7.11.1]	cell attachment protein in somatic embryogenesis [Daucus carota] >BAD72577.1 cell attachment protein in somatic embryogenesis [Daucus carota]	Epidermis-specific secreted glycoprotein EP1 OS=Daucus carota GN=EP1 PE=1 SV=1	D-mannose binding lectin	[R] LSE0276 A Bulb-type mannose-specific lectin domain
CL10096.Contig3_All	K04733//interleukin-1 receptor-associated kinase 4 [EC:2.7.11.1]	cell attachment protein in somatic embryogenesis [Daucus carota] >BAD72577.1 cell attachment protein in somatic embryogenesis [Daucus carota]	Epidermis-specific secreted glycoprotein EP1 OS=Daucus carota GN=EP1 PE=1 SV=1	D-mannose binding lectin	[R] LSE0276 A Bulb-type mannose-specific lectin domain
CL10097.Contig1_All	K17398//DNA (cytosine-5)-methyltransferase 3A [EC:2.1.1.37]+ko01100//Metabolic pathways+ko00270//Cysteine and methionine metabolism	PREDICTED: uncharacterized protein LOC108227632 [Daucus carota subsp. sativus]			[R] LSE0304 A PWWP domain protein
CL10097.Contig2_All	K17398//DNA (cytosine-5)-methyltransferase 3A [EC:2.1.1.37]+ko01100//Metabolic pathways+ko00270//Cysteine and methionine metabolism	PREDICTED: uncharacterized protein LOC108227632 [Daucus carota subsp. sativus]	Serine/threonine-protein kinase ATM OS=Arabidopsis thaliana GN=ATM PE=2 SV=1	PWWP domain	[R] LSE0304 A PWWP domain protein
CL10097.Contig3_All	K17398//DNA (cytosine-5)-methyltransferase 3A [EC:2.1.1.37]+ko01100//Metabolic pathways+ko00270//Cysteine and methionine metabolism	PREDICTED: uncharacterized protein LOC108227632 [Daucus carota subsp. sativus]	Serine/threonine-protein kinase ATM OS=Arabidopsis thaliana GN=ATM PE=2 SV=1	PWWP domain	[R] LSE0304 A PWWP domain protein
CL10097.Contig4_All	K17398//DNA (cytosine-5)-methyltransferase 3A [EC:2.1.1.37]+ko01100//Metabolic pathways+ko00270//Cysteine and methionine metabolism	PREDICTED: uncharacterized protein LOC108227632 [Daucus carota subsp. sativus]	Serine/threonine-protein kinase ATM OS=Arabidopsis thaliana GN=ATM PE=2 SV=1	PWWP domain	[R] LSE0304 A PWWP domain protein
CL10097.Contig5_All	K17398//DNA (cytosine-5)-methyltransferase 3A [EC:2.1.1.37]+ko01100//Metabolic pathways+ko00270//Cysteine and methionine metabolism	PREDICTED: uncharacterized protein LOC108204464 isoform X2 [Daucus carota subsp. sativus]		PWWP domain	[R] LSE0304 A PWWP domain protein
CL10097.Contig6_All	K17398//DNA (cytosine-5)-methyltransferase 3A [EC:2.1.1.37]+ko01100//Metabolic pathways+ko00270//Cysteine and methionine metabolism	hypothetical protein DCAR_003342 [Daucus carota subsp. sativus]			[R] LSE0304 A PWWP domain protein
CL10098.Contig1_All	K12309//beta-galactosidase [EC:3.2.1.23]+ko00600//Sphingolipid metabolism+ko00604//Glycosphingolipid biosynthesis - ganglio series+ko00531//Glycosaminoglycan degradation+ko00511//Other glycan degradation+ko01100//Metabolic pathways+ko00052//Galactose metabolism	PREDICTED: beta-galactosidase 10 isoform X1 [Daucus carota subsp. sativus]	Beta-galactosidase 10 OS=Arabidopsis thaliana GN=BGAL10 PE=2 SV=1	Glycosyl hydrolases family 35	[G] KOG0496 Beta-galactosidase
CL10098.Contig2_All	K12309//beta-galactosidase [EC:3.2.1.23]+ko00600//Sphingolipid metabolism+ko00604//Glycosphingolipid biosynthesis - ganglio series+ko00531//Glycosaminoglycan degradation+ko00511//Other glycan degradation+ko01100//Metabolic pathways+ko00052//Galactose metabolism	PREDICTED: beta-galactosidase 10 isoform X1 [Daucus carota subsp. sativus]	Beta-galactosidase 10 OS=Arabidopsis thaliana GN=BGAL10 PE=2 SV=1	Glycosyl hydrolases family 35	[G] KOG0496 Beta-galactosidase
CL10098.Contig3_All	K12309//beta-galactosidase [EC:3.2.1.23]+ko00600//Sphingolipid metabolism+ko00604//Glycosphingolipid biosynthesis - ganglio series+ko00531//Glycosaminoglycan degradation+ko00511//Other glycan degradation+ko01100//Metabolic pathways+ko00052//Galactose metabolism	PREDICTED: beta-galactosidase 10 isoform X1 [Daucus carota subsp. sativus]	Beta-galactosidase 10 OS=Arabidopsis thaliana GN=BGAL10 PE=2 SV=1	Glycosyl hydrolases family 35	[G] KOG0496 Beta-galactosidase
CL10098.Contig4_All	K12309//beta-galactosidase [EC:3.2.1.23]+ko00600//Sphingolipid metabolism+ko00604//Glycosphingolipid biosynthesis - ganglio series+ko00531//Glycosaminoglycan degradation+ko00511//Other glycan degradation+ko01100//Metabolic pathways+ko00052//Galactose metabolism	PREDICTED: beta-galactosidase 10 isoform X1 [Daucus carota subsp. sativus]	Beta-galactosidase 10 OS=Arabidopsis thaliana GN=BGAL10 PE=2 SV=1	Glycosyl hydrolases family 35	[G] KOG0496 Beta-galactosidase
CL10099.Contig2_All		hypothetical protein DCAR_023735 [Daucus carota subsp. sativus]
CL1010.Contig1_All	K08081//tropinone reductase I [EC:1.1.1.206]+ko00960//Tropane, piperidine and pyridine alkaloid biosynthesis+ko01100//Metabolic pathways+ko01110//Biosynthesis of secondary metabolites	tropinone reductase homolog At5g06060 [Helianthus annuus] >OTG19732.1 putative glucose/ribitol dehydrogenase [Helianthus annuus]	Tropinone reductase homolog At2g29260, chloroplastic OS=Arabidopsis thaliana GN=At2g29260 PE=2 SV=1	Enoyl-(Acyl carrier protein) reductase	[R] KOG0725 Reductases with broad range of substrate specificities
CL1010.Contig2_All	K08081//tropinone reductase I [EC:1.1.1.206]+ko00960//Tropane, piperidine and pyridine alkaloid biosynthesis+ko01100//Metabolic pathways+ko01110//Biosynthesis of secondary metabolites	PREDICTED: tropinone reductase homolog At5g06060-like [Daucus carota subsp. sativus] >KZN05100.1 hypothetical protein DCAR_005937 [Daucus carota subsp. sativus]	Tropinone reductase homolog At2g29260, chloroplastic OS=Arabidopsis thaliana GN=At2g29260 PE=2 SV=1	Enoyl-(Acyl carrier protein) reductase	[R] KOG0725 Reductases with broad range of substrate specificities
CL1010.Contig3_All	K08081//tropinone reductase I [EC:1.1.1.206]+ko00960//Tropane, piperidine and pyridine alkaloid biosynthesis+ko01100//Metabolic pathways+ko01110//Biosynthesis of secondary metabolites	PREDICTED: tropinone reductase homolog At5g06060-like [Daucus carota subsp. sativus] >KZN05100.1 hypothetical protein DCAR_005937 [Daucus carota subsp. sativus]	Tropinone reductase homolog At2g29260, chloroplastic OS=Arabidopsis thaliana GN=At2g29260 PE=2 SV=1	Enoyl-(Acyl carrier protein) reductase	[R] KOG0725 Reductases with broad range of substrate specificities
CL1010.Contig4_All	K08081//tropinone reductase I [EC:1.1.1.206]+ko00960//Tropane, piperidine and pyridine alkaloid biosynthesis+ko01100//Metabolic pathways+ko01110//Biosynthesis of secondary metabolites	PREDICTED: tropinone reductase homolog At5g06060-like [Daucus carota subsp. sativus] >KZN05100.1 hypothetical protein DCAR_005937 [Daucus carota subsp. sativus]	Tropinone reductase homolog At5g06060 OS=Arabidopsis thaliana GN=At5g06060 PE=2 SV=1	Enoyl-(Acyl carrier protein) reductase	[R] KOG0725 Reductases with broad range of substrate specificities
CL1010.Contig5_All	K08081//tropinone reductase I [EC:1.1.1.206]+ko00960//Tropane, piperidine and pyridine alkaloid biosynthesis+ko01100//Metabolic pathways+ko01110//Biosynthesis of secondary metabolites	PREDICTED: tropinone reductase homolog At5g06060-like [Daucus carota subsp. sativus] >KZN05100.1 hypothetical protein DCAR_005937 [Daucus carota subsp. sativus]	Tropinone reductase homolog At1g07440 OS=Arabidopsis thaliana GN=At1g07440 PE=1 SV=1	short chain dehydrogenase	[R] KOG0725 Reductases with broad range of substrate specificities
CL1010.Contig6_All	K08081//tropinone reductase I [EC:1.1.1.206]+ko00960//Tropane, piperidine and pyridine alkaloid biosynthesis+ko01100//Metabolic pathways+ko01110//Biosynthesis of secondary metabolites	PREDICTED: tropinone reductase homolog At5g06060-like [Daucus carota subsp. sativus] >KZN05100.1 hypothetical protein DCAR_005937 [Daucus carota subsp. sativus]	Tropinone reductase homolog At2g29260, chloroplastic OS=Arabidopsis thaliana GN=At2g29260 PE=2 SV=1	short chain dehydrogenase	[R] KOG0725 Reductases with broad range of substrate specificities
CL10100.Contig1_All	K05747//Wiskott-Aldrich syndrome protein+ko04144//Endocytosis;K10955//mucin-2	PREDICTED: extensin isoform X2 [Populus euphratica]	Extensin OS=Daucus carota PE=2 SV=1	Extensin-like region	[M] LSE0120 A Extensin and related proteins
CL10100.Contig2_All	K05747//Wiskott-Aldrich syndrome protein+ko04144//Endocytosis	PREDICTED: extensin isoform X2 [Populus euphratica]	Extensin-3 OS=Arabidopsis thaliana GN=EXT3 PE=1 SV=3		[M] LSE0120 A Extensin and related proteins
CL10101.Contig1_All	K08901//photosystem II oxygen-evolving enhancer protein 3+ko01100//Metabolic pathways+ko00195//Photosynthesis	hypothetical protein DCAR_004174 [Daucus carota subsp. sativus]	Oxygen-evolving enhancer protein 3, chloroplastic OS=Spinacia oleracea GN=PSBQ PE=1 SV=1	Oxygen evolving enhancer protein 3 (PsbQ)
CL10101.Contig2_All	K08901//photosystem II oxygen-evolving enhancer protein 3+ko01100//Metabolic pathways+ko00195//Photosynthesis	PREDICTED: oxygen-evolving enhancer protein 3-2, chloroplastic-like [Daucus carota subsp. sativus]	Oxygen-evolving enhancer protein 3-1, chloroplastic OS=Zea mays GN=PSBQ1 PE=2 SV=1	Oxygen evolving enhancer protein 3 (PsbQ)
CL10101.Contig3_All	K08901//photosystem II oxygen-evolving enhancer protein 3+ko01100//Metabolic pathways+ko00195//Photosynthesis	PREDICTED: oxygen-evolving enhancer protein 3-2, chloroplastic-like [Daucus carota subsp. sativus]	Oxygen-evolving enhancer protein 3-1, chloroplastic OS=Arabidopsis thaliana GN=PSBQ1 PE=1 SV=3	Oxygen evolving enhancer protein 3 (PsbQ)
CL10101.Contig4_All	K08901//photosystem II oxygen-evolving enhancer protein 3+ko01100//Metabolic pathways+ko00195//Photosynthesis	PREDICTED: oxygen-evolving enhancer protein 3-2, chloroplastic-like [Daucus carota subsp. sativus]	Oxygen-evolving enhancer protein 3-1, chloroplastic OS=Arabidopsis thaliana GN=PSBQ1 PE=1 SV=3	Oxygen evolving enhancer protein 3 (PsbQ)
CL10102.Contig1_All		PREDICTED: U-box domain-containing protein 36 [Daucus carota subsp. sativus] >KZM84336.1 hypothetical protein DCAR_028370 [Daucus carota subsp. sativus]
CL10102.Contig2_All	K04733//interleukin-1 receptor-associated kinase 4 [EC:2.7.11.1];K03553//recombination protein RecA+ko03440//Homologous recombination;K14497//protein phosphatase 2C [EC:3.1.3.16]+ko04016//MAPK signaling pathway - plant+ko04075//Plant hormone signal transduction	PREDICTED: U-box domain-containing protein 36 [Daucus carota subsp. sativus] >KZM84336.1 hypothetical protein DCAR_028370 [Daucus carota subsp. sativus]
CL10103.Contig1_All	K03108//signal recognition particle subunit SRP72+ko03060//Protein export	PREDICTED: signal recognition particle subunit SRP72-like [Daucus carota subsp. sativus] >KZM91011.1 hypothetical protein DCAR_021624 [Daucus carota subsp. sativus]		SRP72 RNA-binding domain	[U] KOG2376 Signal recognition particle, subunit Srp72
CL10103.Contig2_All	K03108//signal recognition particle subunit SRP72+ko03060//Protein export	PREDICTED: signal recognition particle subunit SRP72-like [Daucus carota subsp. sativus] >KZM91011.1 hypothetical protein DCAR_021624 [Daucus carota subsp. sativus]		SRP72 RNA-binding domain	[U] KOG2376 Signal recognition particle, subunit Srp72
CL10103.Contig3_All	K03108//signal recognition particle subunit SRP72+ko03060//Protein export	PREDICTED: signal recognition particle subunit SRP72-like [Daucus carota subsp. sativus] >KZM91011.1 hypothetical protein DCAR_021624 [Daucus carota subsp. sativus]		Putative TPR-like repeat	[U] KOG2376 Signal recognition particle, subunit Srp72
CL10103.Contig4_All	K03108//signal recognition particle subunit SRP72+ko03060//Protein export	PREDICTED: signal recognition particle subunit SRP72-like [Daucus carota subsp. sativus] >KZM91011.1 hypothetical protein DCAR_021624 [Daucus carota subsp. sativus]		Putative TPR-like repeat	[U] KOG2376 Signal recognition particle, subunit Srp72
CL10103.Contig5_All	K03108//signal recognition particle subunit SRP72+ko03060//Protein export	PREDICTED: signal recognition particle subunit SRP72-like [Daucus carota subsp. sativus] >KZM91011.1 hypothetical protein DCAR_021624 [Daucus carota subsp. sativus]		Tetratricopeptide repeat	[U] KOG2376 Signal recognition particle, subunit Srp72
CL10106.Contig1_All		PREDICTED: thylakoid membrane protein slr0575 [Daucus carota subsp. sativus] >KZN01100.1 hypothetical protein DCAR_009854 [Daucus carota subsp. sativus]		Protein of unknown function (DUF2854)
CL10106.Contig2_All		PREDICTED: thylakoid membrane protein slr0575 [Daucus carota subsp. sativus] >KZN01100.1 hypothetical protein DCAR_009854 [Daucus carota subsp. sativus]		Protein of unknown function (DUF2854)
CL10106.Contig3_All		PREDICTED: thylakoid membrane protein slr0575 [Daucus carota subsp. sativus] >KZN01100.1 hypothetical protein DCAR_009854 [Daucus carota subsp. sativus]		Protein of unknown function (DUF2854)
CL10106.Contig4_All		PREDICTED: thylakoid membrane protein slr0575 [Daucus carota subsp. sativus] >KZN01100.1 hypothetical protein DCAR_009854 [Daucus carota subsp. sativus]
CL10107.Contig1_All	K18195//rhamnogalacturonan endolyase [EC:4.2.2.23];K01867//tryptophanyl-tRNA synthetase [EC:6.1.1.2]+ko00970//Aminoacyl-tRNA biosynthesis;K16296//serine carboxypeptidase-like clade I [EC:3.4.16.-];K11600//exosome complex component RRP41+ko03018//RNA degradation	hypothetical protein DCAR_010414 [Daucus carota subsp. sativus]		zinc-binding in reverse transcriptase	[R] KOG1075 FOG: Reverse transcriptase
CL10109.Contig1_All	K20241//WD repeat-containing protein 44	PREDICTED: WD repeat-containing protein 44-like [Daucus carota subsp. sativus] >KZN00204.1 hypothetical protein DCAR_008958 [Daucus carota subsp. sativus]	Protein Mut11 OS=Chlamydomonas reinhardtii GN=Mut11 PE=2 SV=1	WD domain, G-beta repeat	[S] KOG0283 WD40 repeat-containing protein
CL10109.Contig2_All	K20241//WD repeat-containing protein 44	PREDICTED: 2-deoxy-glucose resistant protein 2 [Daucus carota subsp. sativus] >XP_017258111.1 PREDICTED: 2-deoxy-glucose resistant protein 2 [Daucus carota subsp. sativus] >KZM92294.1 hypothetical protein DCAR_020341 [Daucus carota subsp. sativus]	Protein Mut11 OS=Chlamydomonas reinhardtii GN=Mut11 PE=2 SV=1	WD domain, G-beta repeat	[S] KOG0283 WD40 repeat-containing protein
CL10109.Contig3_All	K20241//WD repeat-containing protein 44	PREDICTED: WD repeat-containing protein 44-like [Daucus carota subsp. sativus] >KZN00204.1 hypothetical protein DCAR_008958 [Daucus carota subsp. sativus]	Protein Mut11 OS=Chlamydomonas reinhardtii GN=Mut11 PE=2 SV=1	WD domain, G-beta repeat	[S] KOG0283 WD40 repeat-containing protein
CL10109.Contig4_All	K20241//WD repeat-containing protein 44	PREDICTED: WD repeat-containing protein 44-like [Daucus carota subsp. sativus] >KZN00204.1 hypothetical protein DCAR_008958 [Daucus carota subsp. sativus]	Guanine nucleotide-binding protein subunit beta OS=Zea mays GN=GB1 PE=2 SV=1	WD domain, G-beta repeat	[S] KOG0283 WD40 repeat-containing protein
CL10109.Contig5_All	K20241//WD repeat-containing protein 44	PREDICTED: 2-deoxy-glucose resistant protein 2 [Daucus carota subsp. sativus] >XP_017258111.1 PREDICTED: 2-deoxy-glucose resistant protein 2 [Daucus carota subsp. sativus] >KZM92294.1 hypothetical protein DCAR_020341 [Daucus carota subsp. sativus]	COMPASS-like H3K4 histone methylase component WDR5A OS=Arabidopsis thaliana GN=WDR5A PE=1 SV=1	WD domain, G-beta repeat	[S] KOG0283 WD40 repeat-containing protein
CL10109.Contig6_All	K20241//WD repeat-containing protein 44	PREDICTED: 2-deoxy-glucose resistant protein 2 [Daucus carota subsp. sativus] >XP_017258111.1 PREDICTED: 2-deoxy-glucose resistant protein 2 [Daucus carota subsp. sativus] >KZM92294.1 hypothetical protein DCAR_020341 [Daucus carota subsp. sativus]	COMPASS-like H3K4 histone methylase component WDR5A OS=Arabidopsis thaliana GN=WDR5A PE=1 SV=1	WD domain, G-beta repeat	[S] KOG0283 WD40 repeat-containing protein
CL1011.Contig10_All	K16296//serine carboxypeptidase-like clade I [EC:3.4.16.-]	PREDICTED: serine carboxypeptidase-like 2 [Daucus carota subsp. sativus]	Serine carboxypeptidase-like 2 OS=Arabidopsis thaliana GN=SCPL2 PE=2 SV=1	Serine carboxypeptidase	[OE] KOG1282 Serine carboxypeptidases (lysosomal cathepsin A)
CL1011.Contig11_All	K16296//serine carboxypeptidase-like clade I [EC:3.4.16.-]	PREDICTED: serine carboxypeptidase-like 2 [Daucus carota subsp. sativus]	Serine carboxypeptidase-like 2 OS=Arabidopsis thaliana GN=SCPL2 PE=2 SV=1	Serine carboxypeptidase	[OE] KOG1282 Serine carboxypeptidases (lysosomal cathepsin A)
CL1011.Contig12_All	K16296//serine carboxypeptidase-like clade I [EC:3.4.16.-]	PREDICTED: serine carboxypeptidase-like 2 [Daucus carota subsp. sativus]	Serine carboxypeptidase-like 17 OS=Arabidopsis thaliana GN=SCPL17 PE=2 SV=1		[OE] KOG1282 Serine carboxypeptidases (lysosomal cathepsin A)
CL1011.Contig13_All	K16296//serine carboxypeptidase-like clade I [EC:3.4.16.-]
CL1011.Contig14_All	K16296//serine carboxypeptidase-like clade I [EC:3.4.16.-]	PREDICTED: serine carboxypeptidase-like 2 [Daucus carota subsp. sativus]	Serine carboxypeptidase-like 2 OS=Arabidopsis thaliana GN=SCPL2 PE=2 SV=1	Serine carboxypeptidase	[OE] KOG1282 Serine carboxypeptidases (lysosomal cathepsin A)
CL1011.Contig1_All	K16296//serine carboxypeptidase-like clade I [EC:3.4.16.-]	PREDICTED: serine carboxypeptidase-like 2 [Daucus carota subsp. sativus]	Serine carboxypeptidase-like 2 OS=Arabidopsis thaliana GN=SCPL2 PE=2 SV=1	Serine carboxypeptidase	[OE] KOG1282 Serine carboxypeptidases (lysosomal cathepsin A)
CL1011.Contig2_All	K16296//serine carboxypeptidase-like clade I [EC:3.4.16.-]	PREDICTED: serine carboxypeptidase-like 2 [Daucus carota subsp. sativus]	Serine carboxypeptidase-like 17 OS=Arabidopsis thaliana GN=SCPL17 PE=2 SV=1	Serine carboxypeptidase	[OE] KOG1282 Serine carboxypeptidases (lysosomal cathepsin A)
CL1011.Contig3_All	K16296//serine carboxypeptidase-like clade I [EC:3.4.16.-]	PREDICTED: serine carboxypeptidase-like 2 [Daucus carota subsp. sativus]	Serine carboxypeptidase-like 2 OS=Arabidopsis thaliana GN=SCPL2 PE=2 SV=1	Serine carboxypeptidase	[OE] KOG1282 Serine carboxypeptidases (lysosomal cathepsin A)
CL1011.Contig4_All	K16296//serine carboxypeptidase-like clade I [EC:3.4.16.-]	PREDICTED: serine carboxypeptidase-like 2 [Daucus carota subsp. sativus]	Serine carboxypeptidase-like 2 OS=Arabidopsis thaliana GN=SCPL2 PE=2 SV=1	Serine carboxypeptidase	[OE] KOG1282 Serine carboxypeptidases (lysosomal cathepsin A)
CL1011.Contig5_All	K16296//serine carboxypeptidase-like clade I [EC:3.4.16.-]	PREDICTED: serine carboxypeptidase-like 2 [Daucus carota subsp. sativus]	Serine carboxypeptidase-like 2 OS=Arabidopsis thaliana GN=SCPL2 PE=2 SV=1	Serine carboxypeptidase	[OE] KOG1282 Serine carboxypeptidases (lysosomal cathepsin A)
CL1011.Contig6_All	K16296//serine carboxypeptidase-like clade I [EC:3.4.16.-]	PREDICTED: serine carboxypeptidase-like 2 [Daucus carota subsp. sativus]	Serine carboxypeptidase-like 2 OS=Arabidopsis thaliana GN=SCPL2 PE=2 SV=1	Serine carboxypeptidase	[OE] KOG1282 Serine carboxypeptidases (lysosomal cathepsin A)
CL1011.Contig7_All	K16296//serine carboxypeptidase-like clade I [EC:3.4.16.-]	PREDICTED: serine carboxypeptidase-like 2 [Daucus carota subsp. sativus]	Serine carboxypeptidase-like 1 OS=Arabidopsis thaliana GN=SCPL1 PE=2 SV=1	Serine carboxypeptidase	[OE] KOG1282 Serine carboxypeptidases (lysosomal cathepsin A)
CL1011.Contig8_All	K16296//serine carboxypeptidase-like clade I [EC:3.4.16.-]	PREDICTED: serine carboxypeptidase-like 2 [Daucus carota subsp. sativus]	Serine carboxypeptidase-like 2 OS=Arabidopsis thaliana GN=SCPL2 PE=2 SV=1	Serine carboxypeptidase	[OE] KOG1282 Serine carboxypeptidases (lysosomal cathepsin A)
CL1011.Contig9_All	K16296//serine carboxypeptidase-like clade I [EC:3.4.16.-]	PREDICTED: serine carboxypeptidase-like 2 [Daucus carota subsp. sativus]	Serine carboxypeptidase-like 2 OS=Arabidopsis thaliana GN=SCPL2 PE=2 SV=1	Serine carboxypeptidase	[OE] KOG1282 Serine carboxypeptidases (lysosomal cathepsin A)
CL10110.Contig10_All	K05853//Ca2+ transporting ATPase, sarcoplasmic/endoplasmic reticulum [EC:3.6.3.8]	PREDICTED: uncharacterized protein LOC108222911 [Daucus carota subsp. sativus]		Uncharacterized conserved protein (DUF2045)	[S] KOG2465 Uncharacterized conserved protein
CL10110.Contig11_All		PREDICTED: uncharacterized protein LOC108222911 [Daucus carota subsp. sativus]		Uncharacterized conserved protein (DUF2045)	[S] KOG2465 Uncharacterized conserved protein
CL10110.Contig12_All	K05853//Ca2+ transporting ATPase, sarcoplasmic/endoplasmic reticulum [EC:3.6.3.8]	PREDICTED: uncharacterized protein LOC108222911 [Daucus carota subsp. sativus]		Uncharacterized conserved protein (DUF2045)	[S] KOG2465 Uncharacterized conserved protein
CL10110.Contig1_All	K05853//Ca2+ transporting ATPase, sarcoplasmic/endoplasmic reticulum [EC:3.6.3.8]	PREDICTED: uncharacterized protein LOC108222911 [Daucus carota subsp. sativus]		Uncharacterized conserved protein (DUF2045)	[S] KOG2465 Uncharacterized conserved protein
CL10110.Contig2_All	K05853//Ca2+ transporting ATPase, sarcoplasmic/endoplasmic reticulum [EC:3.6.3.8]	PREDICTED: uncharacterized protein LOC108222911 [Daucus carota subsp. sativus]		Uncharacterized conserved protein (DUF2045)	[S] KOG2465 Uncharacterized conserved protein
CL10110.Contig3_All	K05853//Ca2+ transporting ATPase, sarcoplasmic/endoplasmic reticulum [EC:3.6.3.8]	PREDICTED: uncharacterized protein LOC108222911 [Daucus carota subsp. sativus]			[S] KOG2465 Uncharacterized conserved protein
CL10110.Contig4_All	K05853//Ca2+ transporting ATPase, sarcoplasmic/endoplasmic reticulum [EC:3.6.3.8]	PREDICTED: uncharacterized protein LOC108222911 [Daucus carota subsp. sativus]			[S] KOG2465 Uncharacterized conserved protein
CL10110.Contig5_All	K05853//Ca2+ transporting ATPase, sarcoplasmic/endoplasmic reticulum [EC:3.6.3.8]	PREDICTED: uncharacterized protein LOC108222911 [Daucus carota subsp. sativus]		Uncharacterized conserved protein (DUF2045)	[S] KOG2465 Uncharacterized conserved protein
CL10110.Contig6_All	K05853//Ca2+ transporting ATPase, sarcoplasmic/endoplasmic reticulum [EC:3.6.3.8]	PREDICTED: uncharacterized protein LOC108222911 [Daucus carota subsp. sativus]		Uncharacterized conserved protein (DUF2045)	[S] KOG2465 Uncharacterized conserved protein
CL10110.Contig7_All	K05853//Ca2+ transporting ATPase, sarcoplasmic/endoplasmic reticulum [EC:3.6.3.8]	PREDICTED: uncharacterized protein LOC108222911 [Daucus carota subsp. sativus]		Uncharacterized conserved protein (DUF2045)	[S] KOG2465 Uncharacterized conserved protein
CL10110.Contig8_All	K05853//Ca2+ transporting ATPase, sarcoplasmic/endoplasmic reticulum [EC:3.6.3.8]	PREDICTED: uncharacterized protein LOC108222911 [Daucus carota subsp. sativus]		Uncharacterized conserved protein (DUF2045)	[S] KOG2465 Uncharacterized conserved protein
CL10110.Contig9_All	K05853//Ca2+ transporting ATPase, sarcoplasmic/endoplasmic reticulum [EC:3.6.3.8]	PREDICTED: uncharacterized protein LOC108222911 [Daucus carota subsp. sativus]		Uncharacterized conserved protein (DUF2045)	[S] KOG2465 Uncharacterized conserved protein
CL10111.Contig1_All		PREDICTED: organic cation/carnitine transporter 7-like [Daucus carota subsp. sativus] >XP_017243333.1 PREDICTED: organic cation/carnitine transporter 7-like [Daucus carota subsp. sativus] >XP_017243334.1 PREDICTED: organic cation/carnitine transporter 7-like [Daucus carota subsp. sativus] >XP_017243335.1 PREDICTED: organic cation/carnitine transporter 7-like [Daucus carota subsp. sativus] >KZN019…	Organic cation/carnitine transporter 7 OS=Arabidopsis thaliana GN=OCT7 PE=2 SV=1		[R] KOG0253 Synaptic vesicle transporter SV2 (major facilitator superfamily)
CL10111.Contig2_All	K08202//MFS transporter, OCT family, solute carrier family 22 (organic cation transporter), member 4/5	PREDICTED: organic cation/carnitine transporter 7-like [Daucus carota subsp. sativus] >XP_017243333.1 PREDICTED: organic cation/carnitine transporter 7-like [Daucus carota subsp. sativus] >XP_017243334.1 PREDICTED: organic cation/carnitine transporter 7-like [Daucus carota subsp. sativus] >XP_017243335.1 PREDICTED: organic cation/carnitine transporter 7-like [Daucus carota subsp. sativus] >KZN019…	Organic cation/carnitine transporter 7 OS=Arabidopsis thaliana GN=OCT7 PE=2 SV=1	Sugar (and other) transporter	[R] KOG0253 Synaptic vesicle transporter SV2 (major facilitator superfamily)
CL10111.Contig3_All	K08202//MFS transporter, OCT family, solute carrier family 22 (organic cation transporter), member 4/5	PREDICTED: organic cation/carnitine transporter 7-like [Daucus carota subsp. sativus] >XP_017243333.1 PREDICTED: organic cation/carnitine transporter 7-like [Daucus carota subsp. sativus] >XP_017243334.1 PREDICTED: organic cation/carnitine transporter 7-like [Daucus carota subsp. sativus] >XP_017243335.1 PREDICTED: organic cation/carnitine transporter 7-like [Daucus carota subsp. sativus] >KZN019…	Organic cation/carnitine transporter 7 OS=Arabidopsis thaliana GN=OCT7 PE=2 SV=1	Sugar (and other) transporter	[R] KOG0253 Synaptic vesicle transporter SV2 (major facilitator superfamily)
CL10113.Contig1_All	K11275//histone H1/5	HMG-Y-related protein A-like [Carica papaya]	HMG-Y-related protein A OS=Arabidopsis thaliana GN=HMGA PE=1 SV=1	linker histone H1 and H5 family
CL10113.Contig2_All	K11275//histone H1/5	HMG-Y-related protein A-like [Carica papaya]	HMG-Y-related protein A OS=Arabidopsis thaliana GN=HMGA PE=1 SV=1	linker histone H1 and H5 family
CL10114.Contig1_All	K10526//OPC-8:0 CoA ligase 1 [EC:6.2.1.-]+ko00592//alpha-Linolenic acid metabolism+ko01100//Metabolic pathways+ko01110//Biosynthesis of secondary metabolites	PREDICTED: 4-coumarate--CoA ligase-like 9 [Daucus carota subsp. sativus] >KZN10297.1 hypothetical protein DCAR_002953 [Daucus carota subsp. sativus] >ANO53924.1 4-coumarate-CoA ligase [Daucus carota subsp. carota]	4-coumarate--CoA ligase-like 9 OS=Arabidopsis thaliana GN=4CLL9 PE=1 SV=2	AMP-binding enzyme	[I] KOG1176 Acyl-CoA synthetase
CL10114.Contig2_All	K10526//OPC-8:0 CoA ligase 1 [EC:6.2.1.-]+ko00592//alpha-Linolenic acid metabolism+ko01100//Metabolic pathways+ko01110//Biosynthesis of secondary metabolites	PREDICTED: 4-coumarate--CoA ligase-like 9 [Daucus carota subsp. sativus] >KZN10297.1 hypothetical protein DCAR_002953 [Daucus carota subsp. sativus] >ANO53924.1 4-coumarate-CoA ligase [Daucus carota subsp. carota]	4-coumarate--CoA ligase-like 9 OS=Arabidopsis thaliana GN=4CLL9 PE=1 SV=2	AMP-binding enzyme	[I] KOG1176 Acyl-CoA synthetase
CL10115.Contig1_All	K02882//large subunit ribosomal protein L18Ae+ko03010//Ribosome	predicted protein, partial [Hordeum vulgare subsp. vulgare]	60S ribosomal protein L18a-2 OS=Arabidopsis thaliana GN=RPL18AB PE=1 SV=2	Ribosomal proteins 50S-L18Ae/60S-L20/60S-L18A	[J] KOG0829 60S ribosomal protein L18A
CL10115.Contig2_All	K02882//large subunit ribosomal protein L18Ae+ko03010//Ribosome	predicted protein, partial [Hordeum vulgare subsp. vulgare]	60S ribosomal protein L18a-2 OS=Arabidopsis thaliana GN=RPL18AB PE=1 SV=2	Ribosomal proteins 50S-L18Ae/60S-L20/60S-L18A	[J] KOG0829 60S ribosomal protein L18A
CL10115.Contig3_All	K02882//large subunit ribosomal protein L18Ae+ko03010//Ribosome	unknown [Medicago truncatula]	60S ribosomal protein L18a-2 OS=Arabidopsis thaliana GN=RPL18AB PE=1 SV=2		[J] KOG0829 60S ribosomal protein L18A
CL10116.Contig2_All		PREDICTED: uncharacterized protein LOC108213671 [Daucus carota subsp. sativus] >KZN01278.1 hypothetical protein DCAR_010032 [Daucus carota subsp. sativus]		Methyladenine glycosylase
CL10117.Contig1_All		PREDICTED: GATA zinc finger domain-containing protein 14-like, partial [Solanum lycopersicum]
CL10118.Contig1_All				Tumour-suppressor protein CtIP N-terminal domain
CL10118.Contig2_All				Tumour-suppressor protein CtIP N-terminal domain
CL10119.Contig1_All	K22484//transcriptional regulator CBF1;K13422//transcription factor MYC2+ko04016//MAPK signaling pathway - plant+ko04075//Plant hormone signal transduction	PREDICTED: transcription factor bHLH13-like [Daucus carota subsp. sativus] >XP_017236862.1 PREDICTED: transcription factor bHLH13-like [Daucus carota subsp. sativus] >KZN04559.1 hypothetical protein DCAR_005396 [Daucus carota subsp. sativus]	Transcription factor bHLH3 OS=Arabidopsis thaliana GN=BHLH3 PE=1 SV=1	Helix-loop-helix DNA-binding domain	[KT] LSE0107 A bHLH transcription factor
CL10119.Contig2_All	K13422//transcription factor MYC2+ko04016//MAPK signaling pathway - plant+ko04075//Plant hormone signal transduction	PREDICTED: transcription factor bHLH13-like [Daucus carota subsp. sativus] >XP_017236862.1 PREDICTED: transcription factor bHLH13-like [Daucus carota subsp. sativus] >KZN04559.1 hypothetical protein DCAR_005396 [Daucus carota subsp. sativus]	Transcription factor bHLH13 OS=Arabidopsis thaliana GN=BHLH13 PE=1 SV=1	bHLH-MYC and R2R3-MYB transcription factors N-terminal	[KT] LSE0107 A bHLH transcription factor
CL10119.Contig3_All	K13422//transcription factor MYC2+ko04016//MAPK signaling pathway - plant+ko04075//Plant hormone signal transduction	PREDICTED: transcription factor bHLH13-like [Daucus carota subsp. sativus] >XP_017236862.1 PREDICTED: transcription factor bHLH13-like [Daucus carota subsp. sativus] >KZN04559.1 hypothetical protein DCAR_005396 [Daucus carota subsp. sativus]	Transcription factor bHLH13 OS=Arabidopsis thaliana GN=BHLH13 PE=1 SV=1	bHLH-MYC and R2R3-MYB transcription factors N-terminal	[KT] LSE0107 A bHLH transcription factor
CL10119.Contig4_All	K13422//transcription factor MYC2+ko04016//MAPK signaling pathway - plant+ko04075//Plant hormone signal transduction	PREDICTED: transcription factor bHLH13-like [Daucus carota subsp. sativus]	Transcription factor bHLH13 OS=Arabidopsis thaliana GN=BHLH13 PE=1 SV=1	bHLH-MYC and R2R3-MYB transcription factors N-terminal	[KT] LSE0107 A bHLH transcription factor
CL1012.Contig1_All		PREDICTED: protein RETICULATA-RELATED 3, chloroplastic-like [Daucus carota subsp. sativus]	Protein RETICULATA-RELATED 3, chloroplastic OS=Arabidopsis thaliana GN=RER3 PE=1 SV=1	Protein RETICULATA-related	[R] LSE0459 A Chloroplast lumen protein
CL1012.Contig2_All		PREDICTED: protein RETICULATA-RELATED 3, chloroplastic-like [Daucus carota subsp. sativus]	Protein RETICULATA-RELATED 3, chloroplastic OS=Arabidopsis thaliana GN=RER3 PE=1 SV=1	Protein RETICULATA-related	[R] LSE0459 A Chloroplast lumen protein
CL1012.Contig3_All		PREDICTED: protein RETICULATA-RELATED 3, chloroplastic-like [Daucus carota subsp. sativus]	Protein RETICULATA-RELATED 3, chloroplastic OS=Arabidopsis thaliana GN=RER3 PE=1 SV=1	Protein RETICULATA-related	[R] LSE0459 A Chloroplast lumen protein
CL10120.Contig1_All		PREDICTED: protein TIFY 4A-like isoform X1 [Daucus carota subsp. sativus]	Protein TIFY 4A OS=Arabidopsis thaliana GN=TIFY4A PE=1 SV=1	Divergent CCT motif	[S] LSE0151 A Uncharacterized protein
CL10120.Contig2_All	K13464//jasmonate ZIM domain-containing protein+ko04075//Plant hormone signal transduction	PREDICTED: protein TIFY 4A-like isoform X1 [Daucus carota subsp. sativus]	Protein TIFY 4B OS=Arabidopsis thaliana GN=TIFY4B PE=1 SV=1	tify domain	[S] LSE0151 A Uncharacterized protein
CL10122.Contig1_All	K17046//protein DEK	PREDICTED: FK506-binding protein 4-like [Daucus carota subsp. sativus] >KZN06109.1 hypothetical protein DCAR_006946 [Daucus carota subsp. sativus]	Heavy metal-associated isoprenylated plant protein 39 OS=Arabidopsis thaliana GN=HIPP39 PE=2 SV=1	Heavy-metal-associated domain	[P] KOG1603 Copper chaperone
CL10122.Contig2_All	K17046//protein DEK	PREDICTED: FK506-binding protein 4-like [Daucus carota subsp. sativus] >KZN06109.1 hypothetical protein DCAR_006946 [Daucus carota subsp. sativus]	Heavy metal-associated isoprenylated plant protein 39 OS=Arabidopsis thaliana GN=HIPP39 PE=2 SV=1	Protein of unknown function (DUF1510)	[P] KOG1603 Copper chaperone
CL10122.Contig3_All	K17046//protein DEK	PREDICTED: FK506-binding protein 4-like [Daucus carota subsp. sativus] >KZN06109.1 hypothetical protein DCAR_006946 [Daucus carota subsp. sativus]	Heavy metal-associated isoprenylated plant protein 39 OS=Arabidopsis thaliana GN=HIPP39 PE=2 SV=1	Protein of unknown function (DUF1510)	[P] KOG1603 Copper chaperone
CL10123.Contig1_All	K14674//TAG lipase / steryl ester hydrolase / phospholipase A2 / LPA acyltransferase [EC:3.1.1.3 3.1.1.13 3.1.1.4 2.3.1.51]+ko00591//Linoleic acid metabolism+ko00590//Arachidonic acid metabolism+ko00592//alpha-Linolenic acid metabolism+ko01100//Metabolic pathways+ko01110//Biosynthesis of secondary metabolites+ko00100//Steroid biosynthesis+ko00564//Glycerophospholipid metabolism+ko00565//Ether lip…	PREDICTED: triacylglycerol lipase SDP1 [Daucus carota subsp. sativus] >XP_017247248.1 PREDICTED: triacylglycerol lipase SDP1 [Daucus carota subsp. sativus]	Triacylglycerol lipase SDP1 OS=Arabidopsis thaliana GN=SDP1 PE=1 SV=1	Domain of unknown function (DUF3336)	[R] KOG2214 Predicted esterase of the alpha-beta hydrolase superfamily
CL10123.Contig2_All	K14674//TAG lipase / steryl ester hydrolase / phospholipase A2 / LPA acyltransferase [EC:3.1.1.3 3.1.1.13 3.1.1.4 2.3.1.51]+ko00591//Linoleic acid metabolism+ko00590//Arachidonic acid metabolism+ko00592//alpha-Linolenic acid metabolism+ko01100//Metabolic pathways+ko01110//Biosynthesis of secondary metabolites+ko00100//Steroid biosynthesis+ko00564//Glycerophospholipid metabolism+ko00565//Ether lip…	PREDICTED: triacylglycerol lipase SDP1-like isoform X1 [Daucus carota subsp. sativus] >KZM92108.1 hypothetical protein DCAR_020527 [Daucus carota subsp. sativus]	Triacylglycerol lipase SDP1 OS=Arabidopsis thaliana GN=SDP1 PE=1 SV=1	Domain of unknown function (DUF3336)	[R] KOG2214 Predicted esterase of the alpha-beta hydrolase superfamily
CL10123.Contig3_All	K14674//TAG lipase / steryl ester hydrolase / phospholipase A2 / LPA acyltransferase [EC:3.1.1.3 3.1.1.13 3.1.1.4 2.3.1.51]+ko00591//Linoleic acid metabolism+ko00590//Arachidonic acid metabolism+ko00592//alpha-Linolenic acid metabolism+ko01100//Metabolic pathways+ko01110//Biosynthesis of secondary metabolites+ko00100//Steroid biosynthesis+ko00564//Glycerophospholipid metabolism+ko00565//Ether lip…	PREDICTED: triacylglycerol lipase SDP1-like isoform X1 [Daucus carota subsp. sativus] >KZM92108.1 hypothetical protein DCAR_020527 [Daucus carota subsp. sativus]	Triacylglycerol lipase SDP1 OS=Arabidopsis thaliana GN=SDP1 PE=1 SV=1	Domain of unknown function (DUF3336)	[R] KOG2214 Predicted esterase of the alpha-beta hydrolase superfamily
CL10124.Contig1_All	K02331//DNA polymerase phi [EC:2.7.7.7]	PREDICTED: DNA polymerase V [Daucus carota subsp. sativus] >KZM90740.1 hypothetical protein DCAR_021895 [Daucus carota subsp. sativus]		DNA polymerase phi	[K] KOG1926 Predicted regulator of rRNA gene transcription (MYB-binding protein)
CL10124.Contig2_All	K02331//DNA polymerase phi [EC:2.7.7.7]	PREDICTED: DNA polymerase V [Daucus carota subsp. sativus] >KZM90740.1 hypothetical protein DCAR_021895 [Daucus carota subsp. sativus]		DNA polymerase phi	[K] KOG1926 Predicted regulator of rRNA gene transcription (MYB-binding protein)
CL10124.Contig3_All	K02331//DNA polymerase phi [EC:2.7.7.7]	PREDICTED: DNA polymerase V [Daucus carota subsp. sativus] >KZM90740.1 hypothetical protein DCAR_021895 [Daucus carota subsp. sativus]		DNA polymerase phi	[Y] KOG2992 Nucleolar GTPase/ATPase p130
CL10124.Contig4_All	K02331//DNA polymerase phi [EC:2.7.7.7]	PREDICTED: DNA polymerase V [Daucus carota subsp. sativus] >KZM90740.1 hypothetical protein DCAR_021895 [Daucus carota subsp. sativus]		DNA polymerase phi	[Y] KOG2992 Nucleolar GTPase/ATPase p130
CL10124.Contig5_All	K02331//DNA polymerase phi [EC:2.7.7.7]	PREDICTED: DNA polymerase V [Daucus carota subsp. sativus] >KZM90740.1 hypothetical protein DCAR_021895 [Daucus carota subsp. sativus]		DNA polymerase phi	[Y] KOG2992 Nucleolar GTPase/ATPase p130
CL10125.Contig1_All	K13993//HSP20 family protein+ko04141//Protein processing in endoplasmic reticulum	PREDICTED: 17.4 kDa class III heat shock protein [Daucus carota subsp. sativus] >XP_017254395.1 PREDICTED: 17.4 kDa class III heat shock protein [Daucus carota subsp. sativus] >XP_017254396.1 PREDICTED: 17.4 kDa class III heat shock protein [Daucus carota subsp. sativus] >XP_017254397.1 PREDICTED: 17.4 kDa class III heat shock protein [Daucus carota subsp. sativus]	18.6 kDa class III heat shock protein OS=Oryza sativa subsp. japonica GN=HSP18.6 PE=2 SV=1	Hsp20/alpha crystallin family	[O] KOG0710 Molecular chaperone (small heat-shock protein Hsp26/Hsp42)
CL10125.Contig2_All	K13993//HSP20 family protein+ko04141//Protein processing in endoplasmic reticulum	PREDICTED: 17.4 kDa class III heat shock protein [Daucus carota subsp. sativus] >XP_017254395.1 PREDICTED: 17.4 kDa class III heat shock protein [Daucus carota subsp. sativus] >XP_017254396.1 PREDICTED: 17.4 kDa class III heat shock protein [Daucus carota subsp. sativus] >XP_017254397.1 PREDICTED: 17.4 kDa class III heat shock protein [Daucus carota subsp. sativus]	18.6 kDa class III heat shock protein OS=Oryza sativa subsp. japonica GN=HSP18.6 PE=2 SV=1		[O] KOG0710 Molecular chaperone (small heat-shock protein Hsp26/Hsp42)
CL10127.Contig1_All		hypothetical protein DCAR_015592 [Daucus carota subsp. sativus]		Domain of unknown function (DUF4136)
CL10127.Contig2_All		hypothetical protein DCAR_015592 [Daucus carota subsp. sativus]
CL10129.Contig1_All	K11968//ariadne-1 [EC:2.3.2.31]	PREDICTED: probable E3 ubiquitin-protein ligase ARI7 [Daucus carota subsp. sativus]	Probable E3 ubiquitin-protein ligase ARI8 OS=Arabidopsis thaliana GN=ARI8 PE=2 SV=1	IBR domain, a half RING-finger domain	[O] KOG1815 Predicted E3 ubiquitin ligase
CL10129.Contig2_All	K11968//ariadne-1 [EC:2.3.2.31]	PREDICTED: probable E3 ubiquitin-protein ligase ARI7 [Daucus carota subsp. sativus]	Probable E3 ubiquitin-protein ligase ARI5 OS=Arabidopsis thaliana GN=ARI5 PE=2 SV=1	IBR domain, a half RING-finger domain	[O] KOG1815 Predicted E3 ubiquitin ligase
CL10129.Contig3_All	K11968//ariadne-1 [EC:2.3.2.31]	PREDICTED: probable E3 ubiquitin-protein ligase ARI7 [Daucus carota subsp. sativus]	Probable E3 ubiquitin-protein ligase ARI8 OS=Arabidopsis thaliana GN=ARI8 PE=2 SV=1	IBR domain, a half RING-finger domain	[O] KOG1815 Predicted E3 ubiquitin ligase
CL10129.Contig4_All	K11968//ariadne-1 [EC:2.3.2.31]	PREDICTED: probable E3 ubiquitin-protein ligase ARI7 [Daucus carota subsp. sativus]	Probable E3 ubiquitin-protein ligase ARI8 OS=Arabidopsis thaliana GN=ARI8 PE=2 SV=1	IBR domain, a half RING-finger domain	[O] KOG1815 Predicted E3 ubiquitin ligase
CL1013.Contig1_All		PREDICTED: uncharacterized protein LOC108192854 [Daucus carota subsp. sativus]		Plant protein of unknown function (DUF639)
CL1013.Contig2_All		PREDICTED: uncharacterized protein LOC108192854 [Daucus carota subsp. sativus]		Plant protein of unknown function (DUF639)
CL1013.Contig3_All		PREDICTED: uncharacterized protein LOC108192854 [Daucus carota subsp. sativus]		Plant protein of unknown function (DUF639)
CL1013.Contig4_All		PREDICTED: uncharacterized protein LOC108192854 [Daucus carota subsp. sativus]		Plant protein of unknown function (DUF639)
CL1013.Contig5_All		PREDICTED: uncharacterized protein LOC108192854 [Daucus carota subsp. sativus]		Plant protein of unknown function (DUF639)
CL1013.Contig6_All		PREDICTED: uncharacterized protein LOC108192854 [Daucus carota subsp. sativus]		Plant protein of unknown function (DUF639)
CL1013.Contig7_All		hypothetical protein DCAR_023209 [Daucus carota subsp. sativus]		Plant protein of unknown function (DUF639)
CL1013.Contig8_All		PREDICTED: uncharacterized protein LOC108192854 [Daucus carota subsp. sativus]		Plant protein of unknown function (DUF639)
CL10131.Contig1_All		PREDICTED: uncharacterized protein LOC108197717 [Daucus carota subsp. sativus] >KZM84728.1 hypothetical protein DCAR_027850 [Daucus carota subsp. sativus]		BCL7, N-terminal conserver region
CL10131.Contig2_All		PREDICTED: uncharacterized protein LOC108197717 [Daucus carota subsp. sativus] >KZM84728.1 hypothetical protein DCAR_027850 [Daucus carota subsp. sativus]		BCL7, N-terminal conserver region
CL10132.Contig1_All	K17964//leucine-rich PPR motif-containing protein, mitochondrial	PREDICTED: pentatricopeptide repeat-containing protein At1g77405 [Daucus carota subsp. sativus] >XP_017244051.1 PREDICTED: pentatricopeptide repeat-containing protein At1g77405 [Daucus carota subsp. sativus]	Pentatricopeptide repeat-containing protein At1g77405 OS=Arabidopsis thaliana GN=At1g77405 PE=2 SV=1	PPR repeat family	[R] KOG4197 FOG: PPR repeat
CL10132.Contig3_All	K17964//leucine-rich PPR motif-containing protein, mitochondrial	PREDICTED: pentatricopeptide repeat-containing protein At1g77405 [Daucus carota subsp. sativus] >XP_017244051.1 PREDICTED: pentatricopeptide repeat-containing protein At1g77405 [Daucus carota subsp. sativus]	Pentatricopeptide repeat-containing protein At1g77405 OS=Arabidopsis thaliana GN=At1g77405 PE=2 SV=1	PPR repeat family	[R] KOG4197 FOG: PPR repeat
CL10133.Contig1_All	K18038//tyrosine-protein phosphatase non-receptor type 9 [EC:3.1.3.48];K18039//tyrosine-protein phosphatase non-receptor type 20 [EC:3.1.3.48]	PREDICTED: protein-tyrosine-phosphatase PTP1 isoform X1 [Daucus carota subsp. sativus]	Protein-tyrosine-phosphatase PTP1 OS=Arabidopsis thaliana GN=PTP1 PE=1 SV=1	Protein-tyrosine phosphatase	[T] KOG0789 Protein tyrosine phosphatase
CL10133.Contig2_All	K18039//tyrosine-protein phosphatase non-receptor type 20 [EC:3.1.3.48];K18038//tyrosine-protein phosphatase non-receptor type 9 [EC:3.1.3.48];K18032//receptor-type tyrosine-protein phosphatase A [EC:3.1.3.48]	PREDICTED: protein-tyrosine-phosphatase PTP1 isoform X1 [Daucus carota subsp. sativus]	Protein-tyrosine-phosphatase PTP1 OS=Arabidopsis thaliana GN=PTP1 PE=1 SV=1	Protein-tyrosine phosphatase	[T] KOG0789 Protein tyrosine phosphatase
CL10133.Contig3_All	K18038//tyrosine-protein phosphatase non-receptor type 9 [EC:3.1.3.48];K18039//tyrosine-protein phosphatase non-receptor type 20 [EC:3.1.3.48]	PREDICTED: protein-tyrosine-phosphatase PTP1 isoform X1 [Daucus carota subsp. sativus]	Protein-tyrosine-phosphatase PTP1 OS=Arabidopsis thaliana GN=PTP1 PE=1 SV=1		[T] KOG0789 Protein tyrosine phosphatase
CL10133.Contig4_All	K18038//tyrosine-protein phosphatase non-receptor type 9 [EC:3.1.3.48]	hypothetical protein DCAR_010068 [Daucus carota subsp. sativus]	Protein-tyrosine-phosphatase PTP1 OS=Arabidopsis thaliana GN=PTP1 PE=1 SV=1		[T] KOG0789 Protein tyrosine phosphatase
CL10134.Contig1_All	K16465//centrin-1	PREDICTED: psbP domain-containing protein 5, chloroplastic [Daucus carota subsp. sativus]	PsbP domain-containing protein 5, chloroplastic OS=Arabidopsis thaliana GN=PPD5 PE=1 SV=3	PsbP
CL10134.Contig2_All	K16465//centrin-1;K02717//photosystem II oxygen-evolving enhancer protein 2+ko01100//Metabolic pathways+ko00195//Photosynthesis	PREDICTED: psbP domain-containing protein 5, chloroplastic [Daucus carota subsp. sativus]	PsbP domain-containing protein 5, chloroplastic OS=Arabidopsis thaliana GN=PPD5 PE=1 SV=3	PsbP
CL10135.Contig1_All				Helix-loop-helix DNA-binding domain	[K] KOG2588 Predicted DNA-binding protein
CL10135.Contig2_All				Helix-loop-helix DNA-binding domain	[K] KOG2588 Predicted DNA-binding protein
CL10136.Contig1_All	K17496//mitochondrial import inner membrane translocase subunit TIM50	PREDICTED: mitochondrial import inner membrane translocase subunit TIM50-like [Daucus carota subsp. sativus]	Mitochondrial import inner membrane translocase subunit TIM50 OS=Arabidopsis thaliana GN=TIM50 PE=1 SV=1	NLI interacting factor-like phosphatase	[K] KOG2832 TFIIF-interacting CTD phosphatase, including NLI-interacting factor (involved in RNA polymerase II regulation)
CL10136.Contig2_All	K17496//mitochondrial import inner membrane translocase subunit TIM50	PREDICTED: mitochondrial import inner membrane translocase subunit TIM50-like [Daucus carota subsp. sativus]	Mitochondrial import inner membrane translocase subunit TIM50 OS=Arabidopsis thaliana GN=TIM50 PE=1 SV=1	NLI interacting factor-like phosphatase	[K] KOG2832 TFIIF-interacting CTD phosphatase, including NLI-interacting factor (involved in RNA polymerase II regulation)
CL10136.Contig3_All	K17496//mitochondrial import inner membrane translocase subunit TIM50	PREDICTED: mitochondrial import inner membrane translocase subunit TIM50-like [Daucus carota subsp. sativus]	Mitochondrial import inner membrane translocase subunit TIM50 OS=Arabidopsis thaliana GN=TIM50 PE=1 SV=1	NLI interacting factor-like phosphatase	[K] KOG2832 TFIIF-interacting CTD phosphatase, including NLI-interacting factor (involved in RNA polymerase II regulation)
CL10136.Contig4_All	K17496//mitochondrial import inner membrane translocase subunit TIM50	hypothetical protein DCAR_002611 [Daucus carota subsp. sativus]	Mitochondrial import inner membrane translocase subunit TIM50 OS=Arabidopsis thaliana GN=TIM50 PE=1 SV=1	Cbb3-type cytochrome oxidase component FixQ	[K] KOG2832 TFIIF-interacting CTD phosphatase, including NLI-interacting factor (involved in RNA polymerase II regulation)
CL10136.Contig5_All	K17496//mitochondrial import inner membrane translocase subunit TIM50	hypothetical protein DCAR_002611 [Daucus carota subsp. sativus]	Mitochondrial import inner membrane translocase subunit TIM50 OS=Arabidopsis thaliana GN=TIM50 PE=1 SV=1	NLI interacting factor-like phosphatase	[K] KOG2832 TFIIF-interacting CTD phosphatase, including NLI-interacting factor (involved in RNA polymerase II regulation)
CL10136.Contig6_All	K17496//mitochondrial import inner membrane translocase subunit TIM50	hypothetical protein DCAR_002611 [Daucus carota subsp. sativus]	Mitochondrial import inner membrane translocase subunit TIM50 OS=Arabidopsis thaliana GN=TIM50 PE=1 SV=1	NLI interacting factor-like phosphatase	[K] KOG2832 TFIIF-interacting CTD phosphatase, including NLI-interacting factor (involved in RNA polymerase II regulation)
CL10136.Contig7_All	K17496//mitochondrial import inner membrane translocase subunit TIM50	PREDICTED: mitochondrial import inner membrane translocase subunit TIM50-like [Daucus carota subsp. sativus]	Mitochondrial import inner membrane translocase subunit TIM50 OS=Arabidopsis thaliana GN=TIM50 PE=1 SV=1	NLI interacting factor-like phosphatase	[K] KOG2832 TFIIF-interacting CTD phosphatase, including NLI-interacting factor (involved in RNA polymerase II regulation)
CL10136.Contig8_All	K17496//mitochondrial import inner membrane translocase subunit TIM50	PREDICTED: mitochondrial import inner membrane translocase subunit TIM50-like [Daucus carota subsp. sativus]	Mitochondrial import inner membrane translocase subunit TIM50 OS=Arabidopsis thaliana GN=TIM50 PE=1 SV=1	NLI interacting factor-like phosphatase	[K] KOG2832 TFIIF-interacting CTD phosphatase, including NLI-interacting factor (involved in RNA polymerase II regulation)
CL10136.Contig9_All	K17496//mitochondrial import inner membrane translocase subunit TIM50	PREDICTED: mitochondrial import inner membrane translocase subunit TIM50-like [Daucus carota subsp. sativus]	Mitochondrial import inner membrane translocase subunit TIM50 OS=Arabidopsis thaliana GN=TIM50 PE=1 SV=1	NLI interacting factor-like phosphatase	[K] KOG2832 TFIIF-interacting CTD phosphatase, including NLI-interacting factor (involved in RNA polymerase II regulation)
CL10137.Contig1_All	K07442//tRNA (adenine57-N1/adenine58-N1)-methyltransferase catalytic subunit [EC:2.1.1.219 2.1.1.220]	PREDICTED: tRNA (adenine(58)-N(1))-methyltransferase catalytic subunit TRMT61A [Daucus carota subsp. sativus]			[J] KOG2915 tRNA(1-methyladenosine) methyltransferase, subunit GCD14
CL10137.Contig2_All	K07442//tRNA (adenine57-N1/adenine58-N1)-methyltransferase catalytic subunit [EC:2.1.1.219 2.1.1.220]	PREDICTED: tRNA (adenine(58)-N(1))-methyltransferase catalytic subunit TRMT61A [Daucus carota subsp. sativus]		tRNA methyltransferase complex GCD14 subunit	[J] KOG2915 tRNA(1-methyladenosine) methyltransferase, subunit GCD14
CL10137.Contig3_All	K07442//tRNA (adenine57-N1/adenine58-N1)-methyltransferase catalytic subunit [EC:2.1.1.219 2.1.1.220]	PREDICTED: tRNA (adenine(58)-N(1))-methyltransferase catalytic subunit TRMT61A [Daucus carota subsp. sativus]		tRNA methyltransferase complex GCD14 subunit	[J] KOG2915 tRNA(1-methyladenosine) methyltransferase, subunit GCD14
CL10138.Contig1_All	K04733//interleukin-1 receptor-associated kinase 4 [EC:2.7.11.1]	PREDICTED: probable L-type lectin-domain containing receptor kinase S.5 [Daucus carota subsp. sativus] >KZM99097.1 hypothetical protein DCAR_013541 [Daucus carota subsp. sativus]	Probable L-type lectin-domain containing receptor kinase S.5 OS=Arabidopsis thaliana GN=LECRKS5 PE=2 SV=1	Protein kinase domain	[T] LSE0015 A Receptor-like protein kinase, contains lectin domains
CL10138.Contig2_All	K04733//interleukin-1 receptor-associated kinase 4 [EC:2.7.11.1]	PREDICTED: probable L-type lectin-domain containing receptor kinase S.5 [Daucus carota subsp. sativus] >KZM99097.1 hypothetical protein DCAR_013541 [Daucus carota subsp. sativus]	Probable L-type lectin-domain containing receptor kinase S.5 OS=Arabidopsis thaliana GN=LECRKS5 PE=2 SV=1	Protein kinase domain	[T] LSE0015 A Receptor-like protein kinase, contains lectin domains
CL10139.Contig1_All	K20303//trafficking protein particle complex subunit 4	PREDICTED: trafficking protein particle complex subunit 4-like [Daucus carota subsp. sativus] >KZN10680.1 hypothetical protein DCAR_003336 [Daucus carota subsp. sativus]		Sybindin-like family	[U] KOG3369 Transport protein particle (TRAPP) complex subunit
CL10139.Contig2_All	K20303//trafficking protein particle complex subunit 4	PREDICTED: trafficking protein particle complex subunit 4-like [Daucus carota subsp. sativus] >KZN10680.1 hypothetical protein DCAR_003336 [Daucus carota subsp. sativus]		Sybindin-like family	[U] KOG3369 Transport protein particle (TRAPP) complex subunit
CL10139.Contig3_All	K20303//trafficking protein particle complex subunit 4	PREDICTED: trafficking protein particle complex subunit 4-like [Daucus carota subsp. sativus] >KZN10680.1 hypothetical protein DCAR_003336 [Daucus carota subsp. sativus]		Sybindin-like family	[U] KOG3369 Transport protein particle (TRAPP) complex subunit
CL10139.Contig4_All	K20303//trafficking protein particle complex subunit 4	PREDICTED: trafficking protein particle complex subunit 4-like [Daucus carota subsp. sativus] >KZN10680.1 hypothetical protein DCAR_003336 [Daucus carota subsp. sativus]		Sybindin-like family	[U] KOG3369 Transport protein particle (TRAPP) complex subunit
CL1014.Contig1_All	K04374//cyclic AMP-dependent transcription factor ATF-4+ko04141//Protein processing in endoplasmic reticulum;K20557//transcription factor VIP1+ko04016//MAPK signaling pathway - plant	PREDICTED: basic leucine zipper 61-like [Daucus carota subsp. sativus]	Basic leucine zipper 61 OS=Arabidopsis thaliana GN=BZIP61 PE=1 SV=1	bZIP transcription factor	[KR] LSE0037 A R2R3-type MYB transcription factors/VIP1, involved in Agrobacterium VirE2 nuclear import and infectivity
CL1014.Contig2_All	K04374//cyclic AMP-dependent transcription factor ATF-4+ko04141//Protein processing in endoplasmic reticulum;K20557//transcription factor VIP1+ko04016//MAPK signaling pathway - plant	PREDICTED: basic leucine zipper 61-like [Daucus carota subsp. sativus]	Basic leucine zipper 61 OS=Arabidopsis thaliana GN=BZIP61 PE=1 SV=1	bZIP transcription factor	[KR] LSE0037 A R2R3-type MYB transcription factors/VIP1, involved in Agrobacterium VirE2 nuclear import and infectivity
CL10140.Contig1_All		PREDICTED: probable vacuolar amino acid transporter YPQ2 [Daucus carota subsp. sativus]		PQ loop repeat	[S] KOG2913 Predicted membrane protein
CL10140.Contig2_All		PREDICTED: probable vacuolar amino acid transporter YPQ2 [Daucus carota subsp. sativus]		PQ loop repeat	[S] KOG2913 Predicted membrane protein
CL10140.Contig3_All		PREDICTED: probable vacuolar amino acid transporter YPQ2 [Daucus carota subsp. sativus]		PQ loop repeat	[S] KOG2913 Predicted membrane protein
CL10140.Contig4_All		PREDICTED: probable vacuolar amino acid transporter YPQ2 [Daucus carota subsp. sativus]		PQ loop repeat	[S] KOG2913 Predicted membrane protein
CL10140.Contig5_All		PREDICTED: probable vacuolar amino acid transporter YPQ2 [Daucus carota subsp. sativus]		PQ loop repeat	[S] KOG2913 Predicted membrane protein
CL10140.Contig6_All		PREDICTED: probable vacuolar amino acid transporter YPQ2 [Daucus carota subsp. sativus]		PQ loop repeat	[S] KOG2913 Predicted membrane protein
CL10140.Contig7_All		PREDICTED: probable vacuolar amino acid transporter YPQ2 [Daucus carota subsp. sativus]		YfkD-like protein	[S] KOG2913 Predicted membrane protein
CL10141.Contig1_All	K00876//uridine kinase [EC:2.7.1.48]+ko01100//Metabolic pathways+ko00240//Pyrimidine metabolism	PREDICTED: uncharacterized protein LOC108202775 isoform X2 [Daucus carota subsp. sativus]		Phosphoribulokinase / Uridine kinase family	[TZ] KOG4203 Armadillo/beta-Catenin/plakoglobin
CL10141.Contig2_All	K00876//uridine kinase [EC:2.7.1.48]+ko01100//Metabolic pathways+ko00240//Pyrimidine metabolism	PREDICTED: uncharacterized protein LOC108202775 isoform X2 [Daucus carota subsp. sativus]		Phosphoribulokinase / Uridine kinase family	[TZ] KOG4203 Armadillo/beta-Catenin/plakoglobin
CL10141.Contig3_All	K00876//uridine kinase [EC:2.7.1.48]+ko01100//Metabolic pathways+ko00240//Pyrimidine metabolism	PREDICTED: uncharacterized protein LOC108202775 isoform X2 [Daucus carota subsp. sativus]		Phosphoribulokinase / Uridine kinase family	[TZ] KOG4203 Armadillo/beta-Catenin/plakoglobin
CL10141.Contig4_All	K00876//uridine kinase [EC:2.7.1.48]+ko01100//Metabolic pathways+ko00240//Pyrimidine metabolism	PREDICTED: uncharacterized protein LOC108202775 isoform X2 [Daucus carota subsp. sativus]		Phosphoribulokinase / Uridine kinase family	[TZ] KOG4203 Armadillo/beta-Catenin/plakoglobin
CL10142.Contig1_All		hypothetical protein DCAR_001848 [Daucus carota subsp. sativus]	Protein EXECUTER 1, chloroplastic OS=Oryza sativa subsp. japonica GN=EX1 PE=2 SV=1
CL10143.Contig1_All	K08726//soluble epoxide hydrolase / lipid-phosphate phosphatase [EC:3.3.2.10 3.1.3.76]+ko04146//Peroxisome+ko00590//Arachidonic acid metabolism+ko01100//Metabolic pathways;K10144//RING finger and CHY zinc finger domain-containing protein 1 [EC:2.3.2.27]+ko04120//Ubiquitin mediated proteolysis	PREDICTED: bifunctional epoxide hydrolase 2-like isoform X1 [Daucus carota subsp. sativus] >XP_017221272.1 PREDICTED: bifunctional epoxide hydrolase 2-like isoform X2 [Daucus carota subsp. sativus]		alpha/beta hydrolase fold	[I] KOG4178 Soluble epoxide hydrolase
CL10143.Contig2_All	K08726//soluble epoxide hydrolase / lipid-phosphate phosphatase [EC:3.3.2.10 3.1.3.76]+ko04146//Peroxisome+ko00590//Arachidonic acid metabolism+ko01100//Metabolic pathways;K10144//RING finger and CHY zinc finger domain-containing protein 1 [EC:2.3.2.27]+ko04120//Ubiquitin mediated proteolysis	PREDICTED: bifunctional epoxide hydrolase 2-like [Daucus carota subsp. sativus] >KZM84467.1 hypothetical protein DCAR_028111 [Daucus carota subsp. sativus]		alpha/beta hydrolase fold	[I] KOG4178 Soluble epoxide hydrolase
CL10143.Contig3_All	K10144//RING finger and CHY zinc finger domain-containing protein 1 [EC:2.3.2.27]+ko04120//Ubiquitin mediated proteolysis;K08726//soluble epoxide hydrolase / lipid-phosphate phosphatase [EC:3.3.2.10 3.1.3.76]+ko04146//Peroxisome+ko00590//Arachidonic acid metabolism+ko01100//Metabolic pathways	PREDICTED: bifunctional epoxide hydrolase 2-like [Daucus carota subsp. sativus] >KZM84467.1 hypothetical protein DCAR_028111 [Daucus carota subsp. sativus]		alpha/beta hydrolase fold	[I] KOG4178 Soluble epoxide hydrolase
CL10143.Contig4_All	K08726//soluble epoxide hydrolase / lipid-phosphate phosphatase [EC:3.3.2.10 3.1.3.76]+ko04146//Peroxisome+ko00590//Arachidonic acid metabolism+ko01100//Metabolic pathways	PREDICTED: bifunctional epoxide hydrolase 2-like [Daucus carota subsp. sativus] >KZM84465.1 hypothetical protein DCAR_028113 [Daucus carota subsp. sativus]		alpha/beta hydrolase fold	[I] KOG4178 Soluble epoxide hydrolase
CL10143.Contig5_All	K08726//soluble epoxide hydrolase / lipid-phosphate phosphatase [EC:3.3.2.10 3.1.3.76]+ko04146//Peroxisome+ko00590//Arachidonic acid metabolism+ko01100//Metabolic pathways	PREDICTED: bifunctional epoxide hydrolase 2-like [Daucus carota subsp. sativus] >KZM84465.1 hypothetical protein DCAR_028113 [Daucus carota subsp. sativus]		alpha/beta hydrolase fold	[I] KOG4178 Soluble epoxide hydrolase
CL10143.Contig6_All	K10144//RING finger and CHY zinc finger domain-containing protein 1 [EC:2.3.2.27]+ko04120//Ubiquitin mediated proteolysis;K08726//soluble epoxide hydrolase / lipid-phosphate phosphatase [EC:3.3.2.10 3.1.3.76]+ko04146//Peroxisome+ko00590//Arachidonic acid metabolism+ko01100//Metabolic pathways	PREDICTED: bifunctional epoxide hydrolase 2-like [Daucus carota subsp. sativus] >KZM84467.1 hypothetical protein DCAR_028111 [Daucus carota subsp. sativus]		Prolyl oligopeptidase family	[I] KOG4178 Soluble epoxide hydrolase
CL10144.Contig1_All	K02126//F-type H+-transporting ATPase subunit a+ko01100//Metabolic pathways+ko00190//Oxidative phosphorylation	ATPase subunit 6 (mitochondrion) [Nelumbo nucifera] >ALL55117.1 ATPase subunit 6 (mitochondrion) [Nelumbo nucifera]	ATP synthase subunit a OS=Oenothera berteroana GN=ATP6 PE=2 SV=2	ATP synthase A chain	[C] KOG4665 ATP synthase F0 subunit 6 and related proteins
CL10144.Contig2_All	K02126//F-type H+-transporting ATPase subunit a+ko01100//Metabolic pathways+ko00190//Oxidative phosphorylation	ATP synthase F0 subunit 6 (mitochondrion) [Panax ginseng]	ATP synthase subunit a OS=Oenothera berteroana GN=ATP6 PE=2 SV=2		[C] KOG4665 ATP synthase F0 subunit 6 and related proteins
CL10145.Contig1_All	K02981//small subunit ribosomal protein S2e+ko03010//Ribosome	predicted protein [Hordeum vulgare subsp. vulgare]	40S ribosomal protein S2-3 OS=Arabidopsis thaliana GN=RPS2C PE=1 SV=2	Ribosomal protein S5, N-terminal domain	[J] KOG0877 40S ribosomal protein S2/30S ribosomal protein S5
CL10145.Contig2_All	K02981//small subunit ribosomal protein S2e+ko03010//Ribosome	predicted protein [Hordeum vulgare subsp. vulgare]	40S ribosomal protein S2-3 OS=Arabidopsis thaliana GN=RPS2C PE=1 SV=2	Ribosomal protein S5, N-terminal domain	[J] KOG0877 40S ribosomal protein S2/30S ribosomal protein S5
CL10146.Contig1_All	K11644//paired amphipathic helix protein Sin3a	hypothetical protein DCAR_016517 [Daucus carota subsp. sativus]	Paired amphipathic helix protein Sin3-like 4 OS=Arabidopsis thaliana GN=SNL4 PE=3 SV=3	Paired amphipathic helix repeat	[B] KOG4204 Histone deacetylase complex, SIN3 component
CL10146.Contig2_All	K11644//paired amphipathic helix protein Sin3a	hypothetical protein DCAR_016517 [Daucus carota subsp. sativus]	Paired amphipathic helix protein Sin3-like 4 OS=Arabidopsis thaliana GN=SNL4 PE=3 SV=3	Paired amphipathic helix repeat	[B] KOG4204 Histone deacetylase complex, SIN3 component
CL10147.Contig1_All	K20855//beta-1,3-galactosyltransferase 1/2/3/4/5/7/8 [EC:2.4.1.-]	PREDICTED: uncharacterized protein LOC108225068 [Daucus carota subsp. sativus] >XP_017255367.1 PREDICTED: uncharacterized protein LOC108225068 [Daucus carota subsp. sativus] >KZM90068.1 hypothetical protein DCAR_022567 [Daucus carota subsp. sativus]		Senescence regulator
CL10147.Contig2_All	K20855//beta-1,3-galactosyltransferase 1/2/3/4/5/7/8 [EC:2.4.1.-]	PREDICTED: uncharacterized protein LOC108225068 [Daucus carota subsp. sativus] >XP_017255367.1 PREDICTED: uncharacterized protein LOC108225068 [Daucus carota subsp. sativus] >KZM90068.1 hypothetical protein DCAR_022567 [Daucus carota subsp. sativus]		Senescence regulator
CL10147.Contig3_All	K20855//beta-1,3-galactosyltransferase 1/2/3/4/5/7/8 [EC:2.4.1.-]	PREDICTED: uncharacterized protein LOC108225068 [Daucus carota subsp. sativus] >XP_017255367.1 PREDICTED: uncharacterized protein LOC108225068 [Daucus carota subsp. sativus] >KZM90068.1 hypothetical protein DCAR_022567 [Daucus carota subsp. sativus]		Senescence regulator
CL10147.Contig4_All	K20855//beta-1,3-galactosyltransferase 1/2/3/4/5/7/8 [EC:2.4.1.-]	PREDICTED: uncharacterized protein LOC108225068 [Daucus carota subsp. sativus] >XP_017255367.1 PREDICTED: uncharacterized protein LOC108225068 [Daucus carota subsp. sativus] >KZM90068.1 hypothetical protein DCAR_022567 [Daucus carota subsp. sativus]		Senescence regulator
CL10148.Contig1_All	K14406//cleavage stimulation factor subunit 1+ko03015//mRNA surveillance pathway	PREDICTED: cleavage stimulation factor subunit 50 [Daucus carota subsp. sativus] >KZN01409.1 hypothetical protein DCAR_010163 [Daucus carota subsp. sativus]	Cleavage stimulation factor subunit 50 OS=Arabidopsis thaliana GN=CSTF50 PE=1 SV=1	WD domain, G-beta repeat	[A] KOG0640 mRNA cleavage stimulating factor complex; subunit 1
CL10148.Contig2_All	K14406//cleavage stimulation factor subunit 1+ko03015//mRNA surveillance pathway	PREDICTED: cleavage stimulation factor subunit 50 [Daucus carota subsp. sativus] >KZN01409.1 hypothetical protein DCAR_010163 [Daucus carota subsp. sativus]	Cleavage stimulation factor subunit 50 OS=Arabidopsis thaliana GN=CSTF50 PE=1 SV=1	WD domain, G-beta repeat	[A] KOG0640 mRNA cleavage stimulating factor complex; subunit 1
CL10148.Contig3_All	K14406//cleavage stimulation factor subunit 1+ko03015//mRNA surveillance pathway	PREDICTED: cleavage stimulation factor subunit 50 [Daucus carota subsp. sativus] >KZN01409.1 hypothetical protein DCAR_010163 [Daucus carota subsp. sativus]	Cleavage stimulation factor subunit 50 OS=Arabidopsis thaliana GN=CSTF50 PE=1 SV=1	WD domain, G-beta repeat	[A] KOG0640 mRNA cleavage stimulating factor complex; subunit 1
CL10148.Contig4_All	K14406//cleavage stimulation factor subunit 1+ko03015//mRNA surveillance pathway	PREDICTED: cleavage stimulation factor subunit 50 [Daucus carota subsp. sativus] >KZN01409.1 hypothetical protein DCAR_010163 [Daucus carota subsp. sativus]	Cleavage stimulation factor subunit 50 OS=Arabidopsis thaliana GN=CSTF50 PE=1 SV=1	WD domain, G-beta repeat	[A] KOG0640 mRNA cleavage stimulating factor complex; subunit 1
CL10148.Contig5_All	K14406//cleavage stimulation factor subunit 1+ko03015//mRNA surveillance pathway	PREDICTED: cleavage stimulation factor subunit 50 [Daucus carota subsp. sativus] >KZN01409.1 hypothetical protein DCAR_010163 [Daucus carota subsp. sativus]	Cleavage stimulation factor subunit 50 OS=Arabidopsis thaliana GN=CSTF50 PE=1 SV=1	WD domain, G-beta repeat	[A] KOG0640 mRNA cleavage stimulating factor complex; subunit 1
CL10148.Contig6_All	K14406//cleavage stimulation factor subunit 1+ko03015//mRNA surveillance pathway	PREDICTED: cleavage stimulation factor subunit 50 [Daucus carota subsp. sativus] >KZN01409.1 hypothetical protein DCAR_010163 [Daucus carota subsp. sativus]	Cleavage stimulation factor subunit 50 OS=Arabidopsis thaliana GN=CSTF50 PE=1 SV=1	WD domain, G-beta repeat	[A] KOG0640 mRNA cleavage stimulating factor complex; subunit 1
CL10148.Contig7_All	K14406//cleavage stimulation factor subunit 1+ko03015//mRNA surveillance pathway	PREDICTED: cleavage stimulation factor subunit 50 [Daucus carota subsp. sativus] >KZN01409.1 hypothetical protein DCAR_010163 [Daucus carota subsp. sativus]	Cleavage stimulation factor subunit 50 OS=Arabidopsis thaliana GN=CSTF50 PE=1 SV=1	WD domain, G-beta repeat	[A] KOG0640 mRNA cleavage stimulating factor complex; subunit 1
CL10148.Contig8_All	K14406//cleavage stimulation factor subunit 1+ko03015//mRNA surveillance pathway	PREDICTED: cleavage stimulation factor subunit 50 [Daucus carota subsp. sativus] >KZN01409.1 hypothetical protein DCAR_010163 [Daucus carota subsp. sativus]	Cleavage stimulation factor subunit 50 OS=Arabidopsis thaliana GN=CSTF50 PE=1 SV=1	WD domain, G-beta repeat	[A] KOG0640 mRNA cleavage stimulating factor complex; subunit 1
CL10148.Contig9_All	K14406//cleavage stimulation factor subunit 1+ko03015//mRNA surveillance pathway	PREDICTED: cleavage stimulation factor subunit 50 [Daucus carota subsp. sativus] >KZN01409.1 hypothetical protein DCAR_010163 [Daucus carota subsp. sativus]	Cleavage stimulation factor subunit 50 OS=Arabidopsis thaliana GN=CSTF50 PE=1 SV=1		[A] KOG0640 mRNA cleavage stimulating factor complex; subunit 1
CL10149.Contig1_All	K15613//homeobox protein Meis1;K16670//homeobox protein Meis2	PREDICTED: BEL1-like homeodomain protein 9 [Daucus carota subsp. sativus] >KZM95551.1 hypothetical protein DCAR_018793 [Daucus carota subsp. sativus]	BEL1-like homeodomain protein 8 OS=Arabidopsis thaliana GN=BLH8 PE=1 SV=1	Associated with HOX	[K] KOG0773 Transcription factor MEIS1 and related HOX domain proteins
CL10149.Contig2_All	K15613//homeobox protein Meis1;K16670//homeobox protein Meis2	PREDICTED: BEL1-like homeodomain protein 9 [Daucus carota subsp. sativus] >KZM95551.1 hypothetical protein DCAR_018793 [Daucus carota subsp. sativus]	BEL1-like homeodomain protein 8 OS=Arabidopsis thaliana GN=BLH8 PE=1 SV=1	Associated with HOX	[K] KOG0773 Transcription factor MEIS1 and related HOX domain proteins
CL10149.Contig3_All	K15613//homeobox protein Meis1;K16670//homeobox protein Meis2	PREDICTED: BEL1-like homeodomain protein 9 [Daucus carota subsp. sativus] >KZM95551.1 hypothetical protein DCAR_018793 [Daucus carota subsp. sativus]	BEL1-like homeodomain protein 8 OS=Arabidopsis thaliana GN=BLH8 PE=1 SV=1	Associated with HOX	[K] KOG0773 Transcription factor MEIS1 and related HOX domain proteins
CL1015.Contig10_All	K12823//ATP-dependent RNA helicase DDX5/DBP2 [EC:3.6.4.13]+ko03040//Spliceosome	PREDICTED: ATP-dependent RNA helicase-like protein DB10 [Daucus carota subsp. sativus]	ATP-dependent RNA helicase-like protein DB10 OS=Nicotiana sylvestris PE=2 SV=1	DEAD/DEAH box helicase	[A] KOG0331 ATP-dependent RNA helicase
CL1015.Contig11_All	K12823//ATP-dependent RNA helicase DDX5/DBP2 [EC:3.6.4.13]+ko03040//Spliceosome	PREDICTED: ATP-dependent RNA helicase-like protein DB10 [Daucus carota subsp. sativus]	ATP-dependent RNA helicase-like protein DB10 OS=Nicotiana sylvestris PE=2 SV=1	DEAD/DEAH box helicase	[A] KOG0331 ATP-dependent RNA helicase
CL1015.Contig12_All	K12823//ATP-dependent RNA helicase DDX5/DBP2 [EC:3.6.4.13]+ko03040//Spliceosome	PREDICTED: ATP-dependent RNA helicase-like protein DB10 [Daucus carota subsp. sativus]	ATP-dependent RNA helicase-like protein DB10 OS=Nicotiana sylvestris PE=2 SV=1	DEAD/DEAH box helicase	[A] KOG0331 ATP-dependent RNA helicase
CL1015.Contig13_All	K12823//ATP-dependent RNA helicase DDX5/DBP2 [EC:3.6.4.13]+ko03040//Spliceosome	hypothetical protein DCAR_021704 [Daucus carota subsp. sativus]	ATP-dependent RNA helicase-like protein DB10 OS=Nicotiana sylvestris PE=2 SV=1	DEAD/DEAH box helicase	[A] KOG0331 ATP-dependent RNA helicase
CL1015.Contig14_All	K12823//ATP-dependent RNA helicase DDX5/DBP2 [EC:3.6.4.13]+ko03040//Spliceosome	hypothetical protein DCAR_021704 [Daucus carota subsp. sativus]	ATP-dependent RNA helicase-like protein DB10 OS=Nicotiana sylvestris PE=2 SV=1	DEAD/DEAH box helicase	[A] KOG0331 ATP-dependent RNA helicase
CL1015.Contig15_All	K12823//ATP-dependent RNA helicase DDX5/DBP2 [EC:3.6.4.13]+ko03040//Spliceosome	PREDICTED: ATP-dependent RNA helicase-like protein DB10 [Daucus carota subsp. sativus]	ATP-dependent RNA helicase-like protein DB10 OS=Nicotiana sylvestris PE=2 SV=1	Helicase conserved C-terminal domain	[A] KOG0331 ATP-dependent RNA helicase
CL1015.Contig16_All	K12823//ATP-dependent RNA helicase DDX5/DBP2 [EC:3.6.4.13]+ko03040//Spliceosome	PREDICTED: ATP-dependent RNA helicase-like protein DB10 [Daucus carota subsp. sativus]	ATP-dependent RNA helicase-like protein DB10 OS=Nicotiana sylvestris PE=2 SV=1	Helicase conserved C-terminal domain	[A] KOG0331 ATP-dependent RNA helicase
CL1015.Contig17_All	K12823//ATP-dependent RNA helicase DDX5/DBP2 [EC:3.6.4.13]+ko03040//Spliceosome	PREDICTED: ATP-dependent RNA helicase-like protein DB10 [Daucus carota subsp. sativus]	ATP-dependent RNA helicase-like protein DB10 OS=Nicotiana sylvestris PE=2 SV=1	Helicase conserved C-terminal domain	[A] KOG0331 ATP-dependent RNA helicase
CL1015.Contig18_All	K12823//ATP-dependent RNA helicase DDX5/DBP2 [EC:3.6.4.13]+ko03040//Spliceosome	PREDICTED: ATP-dependent RNA helicase-like protein DB10 [Daucus carota subsp. sativus]	ATP-dependent RNA helicase-like protein DB10 OS=Nicotiana sylvestris PE=2 SV=1	DEAD/DEAH box helicase	[A] KOG0331 ATP-dependent RNA helicase
CL1015.Contig19_All	K12823//ATP-dependent RNA helicase DDX5/DBP2 [EC:3.6.4.13]+ko03040//Spliceosome	hypothetical protein DCAR_021704 [Daucus carota subsp. sativus]	ATP-dependent RNA helicase-like protein DB10 OS=Nicotiana sylvestris PE=2 SV=1	DEAD/DEAH box helicase	[A] KOG0331 ATP-dependent RNA helicase
CL1015.Contig1_All	K12823//ATP-dependent RNA helicase DDX5/DBP2 [EC:3.6.4.13]+ko03040//Spliceosome	PREDICTED: ATP-dependent RNA helicase-like protein DB10 [Daucus carota subsp. sativus]	ATP-dependent RNA helicase-like protein DB10 OS=Nicotiana sylvestris PE=2 SV=1	DEAD/DEAH box helicase	[A] KOG0331 ATP-dependent RNA helicase
CL1015.Contig20_All	K12823//ATP-dependent RNA helicase DDX5/DBP2 [EC:3.6.4.13]+ko03040//Spliceosome	hypothetical protein DCAR_021704 [Daucus carota subsp. sativus]	ATP-dependent RNA helicase-like protein DB10 OS=Nicotiana sylvestris PE=2 SV=1	DEAD/DEAH box helicase	[A] KOG0331 ATP-dependent RNA helicase
CL1015.Contig21_All	K12823//ATP-dependent RNA helicase DDX5/DBP2 [EC:3.6.4.13]+ko03040//Spliceosome	hypothetical protein DCAR_021704 [Daucus carota subsp. sativus]	ATP-dependent RNA helicase-like protein DB10 OS=Nicotiana sylvestris PE=2 SV=1	Helicase conserved C-terminal domain	[A] KOG0331 ATP-dependent RNA helicase
CL1015.Contig22_All	K12823//ATP-dependent RNA helicase DDX5/DBP2 [EC:3.6.4.13]+ko03040//Spliceosome	PREDICTED: ATP-dependent RNA helicase-like protein DB10 [Daucus carota subsp. sativus]	ATP-dependent RNA helicase-like protein DB10 OS=Nicotiana sylvestris PE=2 SV=1	DEAD/DEAH box helicase	[A] KOG0331 ATP-dependent RNA helicase
CL1015.Contig23_All	K12823//ATP-dependent RNA helicase DDX5/DBP2 [EC:3.6.4.13]+ko03040//Spliceosome	PREDICTED: ATP-dependent RNA helicase-like protein DB10 [Daucus carota subsp. sativus]	ATP-dependent RNA helicase-like protein DB10 OS=Nicotiana sylvestris PE=2 SV=1	DEAD/DEAH box helicase	[A] KOG0331 ATP-dependent RNA helicase
CL1015.Contig24_All	K12823//ATP-dependent RNA helicase DDX5/DBP2 [EC:3.6.4.13]+ko03040//Spliceosome	PREDICTED: ATP-dependent RNA helicase-like protein DB10 [Daucus carota subsp. sativus]	ATP-dependent RNA helicase-like protein DB10 OS=Nicotiana sylvestris PE=2 SV=1	DEAD/DEAH box helicase	[A] KOG0331 ATP-dependent RNA helicase
CL1015.Contig25_All	K12823//ATP-dependent RNA helicase DDX5/DBP2 [EC:3.6.4.13]+ko03040//Spliceosome	hypothetical protein DCAR_021704 [Daucus carota subsp. sativus]	ATP-dependent RNA helicase-like protein DB10 OS=Nicotiana sylvestris PE=2 SV=1	DEAD/DEAH box helicase	[A] KOG0331 ATP-dependent RNA helicase
CL1015.Contig26_All	K12823//ATP-dependent RNA helicase DDX5/DBP2 [EC:3.6.4.13]+ko03040//Spliceosome	PREDICTED: ATP-dependent RNA helicase-like protein DB10 [Daucus carota subsp. sativus]	ATP-dependent RNA helicase-like protein DB10 OS=Nicotiana sylvestris PE=2 SV=1	DEAD/DEAH box helicase	[A] KOG0331 ATP-dependent RNA helicase
CL1015.Contig27_All	K12823//ATP-dependent RNA helicase DDX5/DBP2 [EC:3.6.4.13]+ko03040//Spliceosome	PREDICTED: ATP-dependent RNA helicase-like protein DB10 [Daucus carota subsp. sativus]	ATP-dependent RNA helicase-like protein DB10 OS=Nicotiana sylvestris PE=2 SV=1	Helicase conserved C-terminal domain	[A] KOG0331 ATP-dependent RNA helicase
CL1015.Contig28_All	K12823//ATP-dependent RNA helicase DDX5/DBP2 [EC:3.6.4.13]+ko03040//Spliceosome	PREDICTED: ATP-dependent RNA helicase-like protein DB10 [Daucus carota subsp. sativus]	ATP-dependent RNA helicase-like protein DB10 OS=Nicotiana sylvestris PE=2 SV=1	DEAD/DEAH box helicase	[A] KOG0331 ATP-dependent RNA helicase
CL1015.Contig29_All	K12823//ATP-dependent RNA helicase DDX5/DBP2 [EC:3.6.4.13]+ko03040//Spliceosome	hypothetical protein DCAR_021704 [Daucus carota subsp. sativus]	ATP-dependent RNA helicase-like protein DB10 OS=Nicotiana sylvestris PE=2 SV=1	DEAD/DEAH box helicase	[A] KOG0331 ATP-dependent RNA helicase
CL1015.Contig2_All	K12823//ATP-dependent RNA helicase DDX5/DBP2 [EC:3.6.4.13]+ko03040//Spliceosome	PREDICTED: ATP-dependent RNA helicase-like protein DB10 [Daucus carota subsp. sativus]	ATP-dependent RNA helicase-like protein DB10 OS=Nicotiana sylvestris PE=2 SV=1	DEAD/DEAH box helicase	[A] KOG0331 ATP-dependent RNA helicase
CL1015.Contig30_All	K12823//ATP-dependent RNA helicase DDX5/DBP2 [EC:3.6.4.13]+ko03040//Spliceosome	PREDICTED: ATP-dependent RNA helicase-like protein DB10 [Daucus carota subsp. sativus]	ATP-dependent RNA helicase-like protein DB10 OS=Nicotiana sylvestris PE=2 SV=1	DEAD/DEAH box helicase	[A] KOG0331 ATP-dependent RNA helicase
CL1015.Contig3_All	K12823//ATP-dependent RNA helicase DDX5/DBP2 [EC:3.6.4.13]+ko03040//Spliceosome	PREDICTED: ATP-dependent RNA helicase-like protein DB10 [Daucus carota subsp. sativus]	ATP-dependent RNA helicase-like protein DB10 OS=Nicotiana sylvestris PE=2 SV=1	DEAD/DEAH box helicase	[A] KOG0331 ATP-dependent RNA helicase
CL1015.Contig4_All	K12823//ATP-dependent RNA helicase DDX5/DBP2 [EC:3.6.4.13]+ko03040//Spliceosome	hypothetical protein DCAR_021704 [Daucus carota subsp. sativus]	ATP-dependent RNA helicase-like protein DB10 OS=Nicotiana sylvestris PE=2 SV=1	Helicase conserved C-terminal domain	[A] KOG0331 ATP-dependent RNA helicase
CL1015.Contig5_All	K12823//ATP-dependent RNA helicase DDX5/DBP2 [EC:3.6.4.13]+ko03040//Spliceosome	PREDICTED: ATP-dependent RNA helicase-like protein DB10 [Daucus carota subsp. sativus]	ATP-dependent RNA helicase-like protein DB10 OS=Nicotiana sylvestris PE=2 SV=1	DEAD/DEAH box helicase	[A] KOG0331 ATP-dependent RNA helicase
CL1015.Contig6_All	K12823//ATP-dependent RNA helicase DDX5/DBP2 [EC:3.6.4.13]+ko03040//Spliceosome	PREDICTED: ATP-dependent RNA helicase-like protein DB10 [Daucus carota subsp. sativus]	ATP-dependent RNA helicase-like protein DB10 OS=Nicotiana sylvestris PE=2 SV=1	Helicase conserved C-terminal domain	[A] KOG0331 ATP-dependent RNA helicase
CL1015.Contig7_All	K12823//ATP-dependent RNA helicase DDX5/DBP2 [EC:3.6.4.13]+ko03040//Spliceosome	hypothetical protein DCAR_021704 [Daucus carota subsp. sativus]	ATP-dependent RNA helicase-like protein DB10 OS=Nicotiana sylvestris PE=2 SV=1	Helicase conserved C-terminal domain	[A] KOG0331 ATP-dependent RNA helicase
CL1015.Contig8_All	K12823//ATP-dependent RNA helicase DDX5/DBP2 [EC:3.6.4.13]+ko03040//Spliceosome	hypothetical protein DCAR_021704 [Daucus carota subsp. sativus]	ATP-dependent RNA helicase-like protein DB10 OS=Nicotiana sylvestris PE=2 SV=1	DEAD/DEAH box helicase	[A] KOG0331 ATP-dependent RNA helicase
CL1015.Contig9_All	K12823//ATP-dependent RNA helicase DDX5/DBP2 [EC:3.6.4.13]+ko03040//Spliceosome	PREDICTED: ATP-dependent RNA helicase-like protein DB10 [Daucus carota subsp. sativus]	ATP-dependent RNA helicase-like protein DB10 OS=Nicotiana sylvestris PE=2 SV=1	Helicase conserved C-terminal domain	[A] KOG0331 ATP-dependent RNA helicase
CL10150.Contig1_All	K22066//BolA-like protein 1	PREDICTED: sufE-like protein 1, chloroplastic/mitochondrial [Daucus carota subsp. sativus] >KZM98860.1 hypothetical protein DCAR_013778 [Daucus carota subsp. sativus]	SufE-like protein 1, chloroplastic/mitochondrial OS=Arabidopsis thaliana GN=SUFE1 PE=1 SV=2	Fe-S metabolism associated domain	[T] KOG2313 Stress-induced protein UVI31+
CL10150.Contig2_All	K22066//BolA-like protein 1	PREDICTED: sufE-like protein 1, chloroplastic/mitochondrial [Daucus carota subsp. sativus] >KZM98860.1 hypothetical protein DCAR_013778 [Daucus carota subsp. sativus]	SufE-like protein 1, chloroplastic/mitochondrial OS=Arabidopsis thaliana GN=SUFE1 PE=1 SV=2	Fe-S metabolism associated domain	[T] KOG2313 Stress-induced protein UVI31+
CL10150.Contig3_All	K22066//BolA-like protein 1	PREDICTED: sufE-like protein 1, chloroplastic/mitochondrial [Daucus carota subsp. sativus] >KZM98860.1 hypothetical protein DCAR_013778 [Daucus carota subsp. sativus]	SufE-like protein 1, chloroplastic/mitochondrial OS=Arabidopsis thaliana GN=SUFE1 PE=1 SV=2	Fe-S metabolism associated domain	[T] KOG2313 Stress-induced protein UVI31+
CL10151.Contig1_All	K11855//ubiquitin carboxyl-terminal hydrolase 36/42 [EC:3.4.19.12];K03006//DNA-directed RNA polymerase II subunit RPB1 [EC:2.7.7.6]+ko00230//Purine metabolism+ko03020//RNA polymerase+ko01100//Metabolic pathways+ko00240//Pyrimidine metabolism	PREDICTED: repetitive proline-rich cell wall protein 1 [Daucus carota subsp. sativus] >KZM84788.1 hypothetical protein DCAR_027790 [Daucus carota subsp. sativus]	36.4 kDa proline-rich protein OS=Solanum lycopersicum GN=TPRP-F1 PE=2 SV=1	Hydrophobic seed protein	[R] LSE0121 A AAI domain
CL10151.Contig2_All	K11855//ubiquitin carboxyl-terminal hydrolase 36/42 [EC:3.4.19.12]	PREDICTED: repetitive proline-rich cell wall protein 1 [Daucus carota subsp. sativus] >KZM84788.1 hypothetical protein DCAR_027790 [Daucus carota subsp. sativus]	36.4 kDa proline-rich protein OS=Solanum lycopersicum GN=TPRP-F1 PE=2 SV=1		[R] LSE0121 A AAI domain
CL10152.Contig1_All	K06236//collagen, type I, alpha+ko04933//AGE-RAGE signaling pathway in diabetic complications;K14491//two-component response regulator ARR-B family+ko04075//Plant hormone signal transduction	PREDICTED: two-component response regulator ORR24-like isoform X2 [Daucus carota subsp. sativus]	Probable transcription factor KAN4 OS=Arabidopsis thaliana GN=KAN4 PE=1 SV=1	Myb-like DNA-binding domain	[RK] LSE0452 A MYB transcription factor
CL10152.Contig2_All	K06236//collagen, type I, alpha+ko04933//AGE-RAGE signaling pathway in diabetic complications;K14491//two-component response regulator ARR-B family+ko04075//Plant hormone signal transduction	PREDICTED: two-component response regulator ORR24-like isoform X2 [Daucus carota subsp. sativus]	Probable transcription factor KAN4 OS=Arabidopsis thaliana GN=KAN4 PE=1 SV=1	Myb-like DNA-binding domain	[RK] LSE0452 A MYB transcription factor
CL10153.Contig1_All	K00665//fatty acid synthase, animal type [EC:2.3.1.85]+ko01100//Metabolic pathways+ko00061//Fatty acid biosynthesis+ko01212//Fatty acid metabolism	hypothetical protein COCSUDRAFT_49000 [Coccomyxa subellipsoidea C-169] >EIE19070.1 hypothetical protein COCSUDRAFT_49000 [Coccomyxa subellipsoidea C-169]			[I] KOG1202 Animal-type fatty acid synthase and related proteins
CL10153.Contig2_All	K00665//fatty acid synthase, animal type [EC:2.3.1.85]+ko01100//Metabolic pathways+ko00061//Fatty acid biosynthesis+ko01212//Fatty acid metabolism	hypothetical protein COCSUDRAFT_49000 [Coccomyxa subellipsoidea C-169] >EIE19070.1 hypothetical protein COCSUDRAFT_49000 [Coccomyxa subellipsoidea C-169]		KR domain	[I] KOG1202 Animal-type fatty acid synthase and related proteins
CL10155.Contig1_All	K17535//serine/threonine-protein kinase TNNI3K [EC:2.7.11.1];K04427//mitogen-activated protein kinase kinase kinase 7 [EC:2.7.11.25]	PREDICTED: serine/threonine-protein kinase HT1 [Daucus carota subsp. sativus]	Serine/threonine-protein kinase STY46 OS=Arabidopsis thaliana GN=STY46 PE=1 SV=1	Protein tyrosine kinase	[T] KOG0192 Tyrosine kinase specific for activated (GTP-bound) p21cdc42Hs
CL10155.Contig2_All	K17535//serine/threonine-protein kinase TNNI3K [EC:2.7.11.1];K04427//mitogen-activated protein kinase kinase kinase 7 [EC:2.7.11.25]	PREDICTED: serine/threonine-protein kinase HT1 [Daucus carota subsp. sativus]	Serine/threonine-protein kinase STY46 OS=Arabidopsis thaliana GN=STY46 PE=1 SV=1	Protein tyrosine kinase	[T] KOG0192 Tyrosine kinase specific for activated (GTP-bound) p21cdc42Hs
CL10155.Contig3_All		PREDICTED: serine/threonine-protein kinase HT1 [Daucus carota subsp. sativus]			[T] KOG0192 Tyrosine kinase specific for activated (GTP-bound) p21cdc42Hs
CL10155.Contig4_All	K04427//mitogen-activated protein kinase kinase kinase 7 [EC:2.7.11.25];K17535//serine/threonine-protein kinase TNNI3K [EC:2.7.11.1]	PREDICTED: serine/threonine-protein kinase HT1 [Daucus carota subsp. sativus]	Serine/threonine-protein kinase STY46 OS=Arabidopsis thaliana GN=STY46 PE=1 SV=1	Protein tyrosine kinase	[T] KOG0192 Tyrosine kinase specific for activated (GTP-bound) p21cdc42Hs
CL10156.Contig1_All	K10418//dynein light chain LC8-type	PREDICTED: dynein light chain LC6, flagellar outer arm [Daucus carota subsp. sativus] >KZM92969.1 hypothetical protein DCAR_016214 [Daucus carota subsp. sativus]	Dynein 8 kDa light chain, flagellar outer arm OS=Chlamydomonas reinhardtii PE=1 SV=1		[Z] KOG3430 Dynein light chain type 1
CL10156.Contig2_All	K10418//dynein light chain LC8-type	PREDICTED: dynein light chain LC6, flagellar outer arm [Daucus carota subsp. sativus] >KZM92969.1 hypothetical protein DCAR_016214 [Daucus carota subsp. sativus]	Dynein 8 kDa light chain, flagellar outer arm OS=Chlamydomonas reinhardtii PE=1 SV=1	Dynein light chain type 1	[Z] KOG3430 Dynein light chain type 1
CL10157.Contig1_All	K17541//SCY1-like protein 2	PREDICTED: uncharacterized protein LOC108216384 [Daucus carota subsp. sativus] >KZM98680.1 hypothetical protein DCAR_013958 [Daucus carota subsp. sativus]	Putative ribonuclease H protein At1g65750 OS=Arabidopsis thaliana GN=At1g65750 PE=3 SV=1	Reverse transcriptase-like	[R] KOG0017 FOG: Transposon-encoded proteins with TYA, reverse transcriptase, integrase domains in various combinations
CL10157.Contig2_All	K17541//SCY1-like protein 2;K11778//ditrans,polycis-polyprenyl diphosphate synthase [EC:2.5.1.87]+ko00900//Terpenoid backbone biosynthesis+ko01110//Biosynthesis of secondary metabolites	PREDICTED: uncharacterized protein LOC108216384 [Daucus carota subsp. sativus] >KZM98680.1 hypothetical protein DCAR_013958 [Daucus carota subsp. sativus]	Putative ribonuclease H protein At1g65750 OS=Arabidopsis thaliana GN=At1g65750 PE=3 SV=1	Reverse transcriptase-like	[R] KOG0017 FOG: Transposon-encoded proteins with TYA, reverse transcriptase, integrase domains in various combinations
CL10157.Contig3_All	K17541//SCY1-like protein 2	PREDICTED: uncharacterized protein LOC108216384 [Daucus carota subsp. sativus] >KZM98680.1 hypothetical protein DCAR_013958 [Daucus carota subsp. sativus]		Reverse transcriptase-like	[R] KOG0017 FOG: Transposon-encoded proteins with TYA, reverse transcriptase, integrase domains in various combinations
CL10158.Contig1_All	K15334//multisite-specific tRNA:(cytosine-C5)-methyltransferase [EC:2.1.1.202]	PREDICTED: tRNA (cytosine(34)-C(5))-methyltransferase isoform X1 [Daucus carota subsp. sativus] >XP_017229045.1 PREDICTED: tRNA (cytosine(34)-C(5))-methyltransferase isoform X2 [Daucus carota subsp. sativus]		16S rRNA methyltransferase RsmB/F	[J] KOG2198 tRNA cytosine-5-methylases and related enzymes of the NOL1/NOP2/sun superfamily
CL10158.Contig2_All	K15334//multisite-specific tRNA:(cytosine-C5)-methyltransferase [EC:2.1.1.202]	hypothetical protein DCAR_003477 [Daucus carota subsp. sativus]		16S rRNA methyltransferase RsmB/F	[J] KOG2198 tRNA cytosine-5-methylases and related enzymes of the NOL1/NOP2/sun superfamily
CL10158.Contig3_All	K15334//multisite-specific tRNA:(cytosine-C5)-methyltransferase [EC:2.1.1.202]	hypothetical protein DCAR_003477 [Daucus carota subsp. sativus]		16S rRNA methyltransferase RsmB/F	[J] KOG2198 tRNA cytosine-5-methylases and related enzymes of the NOL1/NOP2/sun superfamily
CL10158.Contig4_All	K15334//multisite-specific tRNA:(cytosine-C5)-methyltransferase [EC:2.1.1.202]	PREDICTED: tRNA (cytosine(34)-C(5))-methyltransferase isoform X1 [Daucus carota subsp. sativus] >XP_017229045.1 PREDICTED: tRNA (cytosine(34)-C(5))-methyltransferase isoform X2 [Daucus carota subsp. sativus]		16S rRNA methyltransferase RsmB/F	[J] KOG2198 tRNA cytosine-5-methylases and related enzymes of the NOL1/NOP2/sun superfamily
CL10159.Contig1_All	K11253//histone H3;K04733//interleukin-1 receptor-associated kinase 4 [EC:2.7.11.1];K12126//phytochrome-interacting factor 3+ko04712//Circadian rhythm - plant+ko04075//Plant hormone signal transduction;K16189//phytochrome-interacting factor 4+ko04075//Plant hormone signal transduction	PREDICTED: transcription factor bHLH137-like [Daucus carota subsp. sativus] >KZM91224.1 hypothetical protein DCAR_021411 [Daucus carota subsp. sativus]	Transcription factor bHLH49 OS=Arabidopsis thaliana GN=BHLH49 PE=1 SV=1	Helix-loop-helix DNA-binding domain	[KT] LSE0107 A bHLH transcription factor
CL10159.Contig2_All	K11253//histone H3;K07953//GTP-binding protein SAR1 [EC:3.6.5.-]+ko04141//Protein processing in endoplasmic reticulum;K04733//interleukin-1 receptor-associated kinase 4 [EC:2.7.11.1]	PREDICTED: transcription factor bHLH137-like [Daucus carota subsp. sativus] >KZM91224.1 hypothetical protein DCAR_021411 [Daucus carota subsp. sativus]	Transcription factor bHLH62 OS=Arabidopsis thaliana GN=BHLH62 PE=2 SV=1	Helix-loop-helix DNA-binding domain	[KT] LSE0107 A bHLH transcription factor
CL10159.Contig3_All	K11253//histone H3;K07953//GTP-binding protein SAR1 [EC:3.6.5.-]+ko04141//Protein processing in endoplasmic reticulum;K04733//interleukin-1 receptor-associated kinase 4 [EC:2.7.11.1]	PREDICTED: transcription factor bHLH137-like [Daucus carota subsp. sativus] >KZM91224.1 hypothetical protein DCAR_021411 [Daucus carota subsp. sativus]	Transcription factor bHLH62 OS=Arabidopsis thaliana GN=BHLH62 PE=2 SV=1	Helix-loop-helix DNA-binding domain	[KT] LSE0107 A bHLH transcription factor
CL10159.Contig4_All	K11253//histone H3;K04733//interleukin-1 receptor-associated kinase 4 [EC:2.7.11.1];K12126//phytochrome-interacting factor 3+ko04712//Circadian rhythm - plant+ko04075//Plant hormone signal transduction;K16189//phytochrome-interacting factor 4+ko04075//Plant hormone signal transduction	PREDICTED: transcription factor bHLH137-like [Daucus carota subsp. sativus] >KZM91224.1 hypothetical protein DCAR_021411 [Daucus carota subsp. sativus]	Transcription factor bHLH49 OS=Arabidopsis thaliana GN=BHLH49 PE=1 SV=1	Helix-loop-helix DNA-binding domain	[KT] LSE0107 A bHLH transcription factor
CL10159.Contig5_All	K11253//histone H3;K04733//interleukin-1 receptor-associated kinase 4 [EC:2.7.11.1];K12126//phytochrome-interacting factor 3+ko04712//Circadian rhythm - plant+ko04075//Plant hormone signal transduction;K16189//phytochrome-interacting factor 4+ko04075//Plant hormone signal transduction	PREDICTED: transcription factor bHLH137-like [Daucus carota subsp. sativus] >KZM91224.1 hypothetical protein DCAR_021411 [Daucus carota subsp. sativus]	Transcription factor bHLH49 OS=Arabidopsis thaliana GN=BHLH49 PE=1 SV=1	Helix-loop-helix DNA-binding domain	[KT] LSE0107 A bHLH transcription factor
CL10159.Contig6_All	K11253//histone H3;K04733//interleukin-1 receptor-associated kinase 4 [EC:2.7.11.1];K12126//phytochrome-interacting factor 3+ko04712//Circadian rhythm - plant+ko04075//Plant hormone signal transduction;K16189//phytochrome-interacting factor 4+ko04075//Plant hormone signal transduction	PREDICTED: transcription factor bHLH137-like [Daucus carota subsp. sativus] >KZM91224.1 hypothetical protein DCAR_021411 [Daucus carota subsp. sativus]	Transcription factor bHLH49 OS=Arabidopsis thaliana GN=BHLH49 PE=1 SV=1	Helix-loop-helix DNA-binding domain	[KT] LSE0107 A bHLH transcription factor
CL10159.Contig7_All	K11253//histone H3;K04733//interleukin-1 receptor-associated kinase 4 [EC:2.7.11.1];K16189//phytochrome-interacting factor 4+ko04075//Plant hormone signal transduction;K12126//phytochrome-interacting factor 3+ko04712//Circadian rhythm - plant+ko04075//Plant hormone signal transduction	PREDICTED: transcription factor bHLH137-like [Daucus carota subsp. sativus] >KZM91224.1 hypothetical protein DCAR_021411 [Daucus carota subsp. sativus]	Transcription factor bHLH76 OS=Arabidopsis thaliana GN=BHLH76 PE=1 SV=1	Helix-loop-helix DNA-binding domain	[KT] LSE0107 A bHLH transcription factor
CL10159.Contig8_All		PREDICTED: transcription factor bHLH137-like [Daucus carota subsp. sativus] >KZM91224.1 hypothetical protein DCAR_021411 [Daucus carota subsp. sativus]	Transcription factor bHLH78 OS=Arabidopsis thaliana GN=BHLH78 PE=1 SV=1		[KT] LSE0107 A bHLH transcription factor
CL1016.Contig1_All	K03787//5'-nucleotidase [EC:3.1.3.5]+ko00230//Purine metabolism+ko01100//Metabolic pathways+ko00760//Nicotinate and nicotinamide metabolism+ko01110//Biosynthesis of secondary metabolites+ko00240//Pyrimidine metabolism	PREDICTED: 5'-nucleotidase SurE-like [Daucus carota subsp. sativus] >KZN06792.1 hypothetical protein DCAR_007629 [Daucus carota subsp. sativus]		Survival protein SurE
CL1016.Contig2_All	K03787//5'-nucleotidase [EC:3.1.3.5]+ko00230//Purine metabolism+ko01100//Metabolic pathways+ko00760//Nicotinate and nicotinamide metabolism+ko01110//Biosynthesis of secondary metabolites+ko00240//Pyrimidine metabolism	PREDICTED: 5'-nucleotidase SurE-like [Daucus carota subsp. sativus] >KZN06792.1 hypothetical protein DCAR_007629 [Daucus carota subsp. sativus]		Survival protein SurE
CL1016.Contig3_All	K03787//5'-nucleotidase [EC:3.1.3.5]+ko00230//Purine metabolism+ko01100//Metabolic pathways+ko00760//Nicotinate and nicotinamide metabolism+ko01110//Biosynthesis of secondary metabolites+ko00240//Pyrimidine metabolism	PREDICTED: 5'-nucleotidase SurE-like [Daucus carota subsp. sativus] >KZN06792.1 hypothetical protein DCAR_007629 [Daucus carota subsp. sativus]
CL1016.Contig4_All	K03787//5'-nucleotidase [EC:3.1.3.5]+ko00230//Purine metabolism+ko01100//Metabolic pathways+ko00760//Nicotinate and nicotinamide metabolism+ko01110//Biosynthesis of secondary metabolites+ko00240//Pyrimidine metabolism	PREDICTED: 5'-nucleotidase SurE-like [Daucus carota subsp. sativus] >KZN06792.1 hypothetical protein DCAR_007629 [Daucus carota subsp. sativus]		Survival protein SurE
CL1016.Contig5_All	K03787//5'-nucleotidase [EC:3.1.3.5]+ko00230//Purine metabolism+ko01100//Metabolic pathways+ko00760//Nicotinate and nicotinamide metabolism+ko01110//Biosynthesis of secondary metabolites+ko00240//Pyrimidine metabolism	PREDICTED: 5'-nucleotidase SurE-like [Daucus carota subsp. sativus] >KZN06792.1 hypothetical protein DCAR_007629 [Daucus carota subsp. sativus]		Survival protein SurE
CL1016.Contig6_All	K03787//5'-nucleotidase [EC:3.1.3.5]+ko00230//Purine metabolism+ko01100//Metabolic pathways+ko00760//Nicotinate and nicotinamide metabolism+ko01110//Biosynthesis of secondary metabolites+ko00240//Pyrimidine metabolism	PREDICTED: 5'-nucleotidase SurE-like [Daucus carota subsp. sativus] >KZM89313.1 hypothetical protein DCAR_026388 [Daucus carota subsp. sativus]		Survival protein SurE
CL1016.Contig7_All	K03787//5'-nucleotidase [EC:3.1.3.5]+ko00230//Purine metabolism+ko01100//Metabolic pathways+ko00760//Nicotinate and nicotinamide metabolism+ko01110//Biosynthesis of secondary metabolites+ko00240//Pyrimidine metabolism	PREDICTED: 5'-nucleotidase SurE-like [Daucus carota subsp. sativus] >KZN06792.1 hypothetical protein DCAR_007629 [Daucus carota subsp. sativus]		Survival protein SurE
CL1016.Contig8_All	K03787//5'-nucleotidase [EC:3.1.3.5]+ko00230//Purine metabolism+ko01100//Metabolic pathways+ko00760//Nicotinate and nicotinamide metabolism+ko01110//Biosynthesis of secondary metabolites+ko00240//Pyrimidine metabolism	PREDICTED: 5'-nucleotidase SurE-like [Daucus carota subsp. sativus] >KZN06792.1 hypothetical protein DCAR_007629 [Daucus carota subsp. sativus]
CL1016.Contig9_All	K03787//5'-nucleotidase [EC:3.1.3.5]+ko00230//Purine metabolism+ko01100//Metabolic pathways+ko00760//Nicotinate and nicotinamide metabolism+ko01110//Biosynthesis of secondary metabolites+ko00240//Pyrimidine metabolism	PREDICTED: 5'-nucleotidase SurE-like [Daucus carota subsp. sativus] >KZM89313.1 hypothetical protein DCAR_026388 [Daucus carota subsp. sativus]		Survival protein SurE
CL10160.Contig1_All	K02945//small subunit ribosomal protein S1+ko03010//Ribosome	PREDICTED: 30S ribosomal protein S1, chloroplastic-like [Daucus carota subsp. sativus] >KZM86243.1 hypothetical protein DCAR_023377 [Daucus carota subsp. sativus]	30S ribosomal protein S1, chloroplastic OS=Spinacia oleracea GN=RPS1 PE=1 SV=1	S1 RNA binding domain	[J] LSE0381 A Plastidial ribosomal protein S1
CL10160.Contig2_All	K02945//small subunit ribosomal protein S1+ko03010//Ribosome	PREDICTED: 30S ribosomal protein S1, chloroplastic-like [Daucus carota subsp. sativus]	30S ribosomal protein S1, chloroplastic OS=Spinacia oleracea GN=RPS1 PE=1 SV=1	S1 RNA binding domain	[J] LSE0381 A Plastidial ribosomal protein S1
CL10160.Contig3_All	K02945//small subunit ribosomal protein S1+ko03010//Ribosome	PREDICTED: 30S ribosomal protein S1, chloroplastic-like [Daucus carota subsp. sativus]	30S ribosomal protein S1, chloroplastic OS=Spinacia oleracea GN=RPS1 PE=1 SV=1	S1 RNA binding domain	[J] LSE0381 A Plastidial ribosomal protein S1
CL10160.Contig4_All	K02945//small subunit ribosomal protein S1+ko03010//Ribosome	PREDICTED: 30S ribosomal protein S1, chloroplastic-like [Daucus carota subsp. sativus]	30S ribosomal protein S1, chloroplastic OS=Spinacia oleracea GN=RPS1 PE=1 SV=1	S1 RNA binding domain	[J] LSE0381 A Plastidial ribosomal protein S1
CL10160.Contig5_All	K02945//small subunit ribosomal protein S1+ko03010//Ribosome	PREDICTED: 30S ribosomal protein S1, chloroplastic-like [Daucus carota subsp. sativus]	30S ribosomal protein S1, chloroplastic OS=Spinacia oleracea GN=RPS1 PE=1 SV=1	S1 RNA binding domain	[J] LSE0381 A Plastidial ribosomal protein S1
CL10161.Contig1_All	K01785//aldose 1-epimerase [EC:5.1.3.3]+ko00010//Glycolysis / Gluconeogenesis+ko01100//Metabolic pathways+ko00052//Galactose metabolism+ko01110//Biosynthesis of secondary metabolites	PREDICTED: aldose 1-epimerase [Daucus carota subsp. sativus] >KZM84359.1 hypothetical protein DCAR_028347 [Daucus carota subsp. sativus]			[G] KOG1604 Predicted mutarotase
CL10161.Contig2_All	K01785//aldose 1-epimerase [EC:5.1.3.3]+ko00010//Glycolysis / Gluconeogenesis+ko01100//Metabolic pathways+ko00052//Galactose metabolism+ko01110//Biosynthesis of secondary metabolites	PREDICTED: aldose 1-epimerase [Daucus carota subsp. sativus] >KZM84359.1 hypothetical protein DCAR_028347 [Daucus carota subsp. sativus]		Aldose 1-epimerase	[G] KOG1604 Predicted mutarotase
CL10161.Contig3_All	K01785//aldose 1-epimerase [EC:5.1.3.3]+ko00010//Glycolysis / Gluconeogenesis+ko01100//Metabolic pathways+ko00052//Galactose metabolism+ko01110//Biosynthesis of secondary metabolites	PREDICTED: aldose 1-epimerase [Daucus carota subsp. sativus] >KZM84359.1 hypothetical protein DCAR_028347 [Daucus carota subsp. sativus]			[G] KOG1604 Predicted mutarotase
CL10161.Contig4_All	K01785//aldose 1-epimerase [EC:5.1.3.3]+ko00010//Glycolysis / Gluconeogenesis+ko01100//Metabolic pathways+ko00052//Galactose metabolism+ko01110//Biosynthesis of secondary metabolites	PREDICTED: aldose 1-epimerase [Daucus carota subsp. sativus] >KZM84359.1 hypothetical protein DCAR_028347 [Daucus carota subsp. sativus]		Aldose 1-epimerase	[G] KOG1604 Predicted mutarotase
CL10162.Contig1_All	K16573//gamma-tubulin complex component 6	PREDICTED: protein trichome birefringence-like [Daucus carota subsp. sativus] >KZM93790.1 hypothetical protein DCAR_017035 [Daucus carota subsp. sativus]	Protein trichome birefringence OS=Arabidopsis thaliana GN=TBR PE=1 SV=1	GDSL/SGNH-like Acyl-Esterase family found in Pmr5 and Cas1p	[S] LSE0451 A Uncharacterized protein
CL10162.Contig2_All	K16573//gamma-tubulin complex component 6	PREDICTED: protein trichome birefringence-like [Daucus carota subsp. sativus] >KZM93790.1 hypothetical protein DCAR_017035 [Daucus carota subsp. sativus]	Protein trichome birefringence OS=Arabidopsis thaliana GN=TBR PE=1 SV=1	GDSL/SGNH-like Acyl-Esterase family found in Pmr5 and Cas1p	[S] LSE0451 A Uncharacterized protein
CL10162.Contig3_All	K16573//gamma-tubulin complex component 6	PREDICTED: protein trichome birefringence [Daucus carota subsp. sativus] >KZM96538.1 hypothetical protein DCAR_019780 [Daucus carota subsp. sativus]	Protein trichome birefringence OS=Arabidopsis thaliana GN=TBR PE=1 SV=1	GDSL/SGNH-like Acyl-Esterase family found in Pmr5 and Cas1p	[S] LSE0451 A Uncharacterized protein
CL10162.Contig4_All	K16573//gamma-tubulin complex component 6	PREDICTED: protein trichome birefringence-like [Daucus carota subsp. sativus] >KZM93790.1 hypothetical protein DCAR_017035 [Daucus carota subsp. sativus]	Protein trichome birefringence OS=Arabidopsis thaliana GN=TBR PE=1 SV=1	GDSL/SGNH-like Acyl-Esterase family found in Pmr5 and Cas1p	[S] LSE0451 A Uncharacterized protein
CL10162.Contig5_All	K16573//gamma-tubulin complex component 6	PREDICTED: protein trichome birefringence [Daucus carota subsp. sativus] >KZM96538.1 hypothetical protein DCAR_019780 [Daucus carota subsp. sativus]	Protein trichome birefringence OS=Arabidopsis thaliana GN=TBR PE=1 SV=1	GDSL/SGNH-like Acyl-Esterase family found in Pmr5 and Cas1p	[S] LSE0451 A Uncharacterized protein
CL10162.Contig6_All	K16573//gamma-tubulin complex component 6	PREDICTED: protein trichome birefringence [Daucus carota subsp. sativus] >KZM96538.1 hypothetical protein DCAR_019780 [Daucus carota subsp. sativus]	Protein trichome birefringence OS=Arabidopsis thaliana GN=TBR PE=1 SV=1	GDSL/SGNH-like Acyl-Esterase family found in Pmr5 and Cas1p	[S] LSE0451 A Uncharacterized protein
CL10162.Contig7_All	K16573//gamma-tubulin complex component 6	PREDICTED: protein trichome birefringence-like isoform X2 [Daucus carota subsp. sativus] >KZM92785.1 hypothetical protein DCAR_019850 [Daucus carota subsp. sativus]	Protein trichome birefringence OS=Arabidopsis thaliana GN=TBR PE=1 SV=1	GDSL/SGNH-like Acyl-Esterase family found in Pmr5 and Cas1p	[S] LSE0451 A Uncharacterized protein
CL10164.Contig1_All		PREDICTED: protein LURP-one-related 15-like [Daucus carota subsp. sativus]	Protein LURP-one-related 15 OS=Arabidopsis thaliana GN=At5g01750 PE=1 SV=1
CL10164.Contig2_All		PREDICTED: protein LURP-one-related 15-like [Daucus carota subsp. sativus] >KZM83673.1 hypothetical protein DCAR_028905 [Daucus carota subsp. sativus]	Protein LURP-one-related 15 OS=Arabidopsis thaliana GN=At5g01750 PE=1 SV=1
CL10165.Contig1_All	K00654//serine palmitoyltransferase [EC:2.3.1.50]+ko00600//Sphingolipid metabolism+ko01100//Metabolic pathways	PREDICTED: long chain base biosynthesis protein 2b [Daucus carota subsp. sativus]	Long chain base biosynthesis protein 2a OS=Arabidopsis thaliana GN=LCB2a PE=1 SV=1	Aminotransferase class I and II	[O] KOG1357 Serine palmitoyltransferase
CL10165.Contig2_All	K00654//serine palmitoyltransferase [EC:2.3.1.50]+ko00600//Sphingolipid metabolism+ko01100//Metabolic pathways	PREDICTED: long chain base biosynthesis protein 2b [Daucus carota subsp. sativus]	Long chain base biosynthesis protein 2a OS=Oryza sativa subsp. japonica GN=Os11g0516000 PE=2 SV=1	Aminotransferase class I and II	[O] KOG1357 Serine palmitoyltransferase
CL10165.Contig3_All	K00654//serine palmitoyltransferase [EC:2.3.1.50]+ko00600//Sphingolipid metabolism+ko01100//Metabolic pathways	PREDICTED: long chain base biosynthesis protein 2b [Daucus carota subsp. sativus]	Long chain base biosynthesis protein 2a OS=Oryza sativa subsp. japonica GN=Os11g0516000 PE=2 SV=1	Aminotransferase class I and II	[O] KOG1357 Serine palmitoyltransferase
CL10165.Contig4_All	K00654//serine palmitoyltransferase [EC:2.3.1.50]+ko00600//Sphingolipid metabolism+ko01100//Metabolic pathways	PREDICTED: long chain base biosynthesis protein 2b [Daucus carota subsp. sativus]	Long chain base biosynthesis protein 2b OS=Arabidopsis thaliana GN=LCB2b PE=1 SV=1	Aminotransferase class I and II	[O] KOG1357 Serine palmitoyltransferase
CL10166.Contig1_All	K04733//interleukin-1 receptor-associated kinase 4 [EC:2.7.11.1];K11866//STAM-binding protein [EC:3.4.19.12]+ko04144//Endocytosis;K10398//kinesin family member 11;K21026//acetylajmaline esterase [EC:3.1.1.80]+ko00901//Indole alkaloid biosynthesis+ko01110//Biosynthesis of secondary metabolites;K03283//heat shock 70kDa protein 1/2/6/8+ko03040//Spliceosome+ko04144//Endocytosis+ko04141//Protein proce…	PREDICTED: zinc finger BED domain-containing protein RICESLEEPER 1-like [Daucus carota subsp. sativus]	Zinc finger BED domain-containing protein RICESLEEPER 1 OS=Oryza sativa subsp. japonica GN=Os05g0239150 PE=3 SV=1	Domain of unknown function (DUF4413)	[L] KOG1121 Tam3-transposase (Ac family)
CL10166.Contig2_All	K04733//interleukin-1 receptor-associated kinase 4 [EC:2.7.11.1];K11866//STAM-binding protein [EC:3.4.19.12]+ko04144//Endocytosis;K10398//kinesin family member 11;K21026//acetylajmaline esterase [EC:3.1.1.80]+ko00901//Indole alkaloid biosynthesis+ko01110//Biosynthesis of secondary metabolites;K03283//heat shock 70kDa protein 1/2/6/8+ko03040//Spliceosome+ko04144//Endocytosis+ko04141//Protein proce…	PREDICTED: zinc finger BED domain-containing protein RICESLEEPER 1-like [Daucus carota subsp. sativus]	Zinc finger BED domain-containing protein RICESLEEPER 1 OS=Oryza sativa subsp. japonica GN=Os05g0239150 PE=3 SV=1	Domain of unknown function (DUF4413)	[L] KOG1121 Tam3-transposase (Ac family)
CL10167.Contig1_All	K18678//phytol kinase [EC:2.7.1.182]	PREDICTED: probable phytol kinase 1, chloroplastic [Daucus carota subsp. sativus] >KZM95806.1 hypothetical protein DCAR_019048 [Daucus carota subsp. sativus]	Probable phytol kinase 1, chloroplastic OS=Glycine max PE=2 SV=1	Gram positive anchor	[S] KOG4453 Predicted ER membrane protein
CL10167.Contig2_All	K18678//phytol kinase [EC:2.7.1.182]	PREDICTED: probable phytol kinase 1, chloroplastic [Daucus carota subsp. sativus] >KZM95806.1 hypothetical protein DCAR_019048 [Daucus carota subsp. sativus]	Probable phytol kinase 1, chloroplastic OS=Glycine max PE=2 SV=1	Gram positive anchor	[S] KOG4453 Predicted ER membrane protein
CL10167.Contig3_All	K18678//phytol kinase [EC:2.7.1.182]	PREDICTED: probable phytol kinase 1, chloroplastic [Daucus carota subsp. sativus] >KZM95806.1 hypothetical protein DCAR_019048 [Daucus carota subsp. sativus]	Probable phytol kinase 1, chloroplastic OS=Glycine max PE=2 SV=1	Gram positive anchor	[S] KOG4453 Predicted ER membrane protein
CL10168.Contig1_All	K10631//E3 ubiquitin-protein ligase Topors [EC:2.3.2.27]	PREDICTED: LOW QUALITY PROTEIN: E3 ubiquitin-protein ligase Topors [Daucus carota subsp. sativus]		Ring finger domain	[R] KOG0825 PHD Zn-finger protein
CL10168.Contig2_All	K10631//E3 ubiquitin-protein ligase Topors [EC:2.3.2.27]	PREDICTED: LOW QUALITY PROTEIN: E3 ubiquitin-protein ligase Topors [Daucus carota subsp. sativus]		PWI domain	[K] KOG4430 Topoisomerase I-binding arginine-serine-rich protein
CL10169.Contig1_All	K13105//proline-rich protein PRCC	PREDICTED: rho GTPase-activating protein gacK [Daucus carota subsp. sativus] >XP_017229040.1 PREDICTED: rho GTPase-activating protein gacK [Daucus carota subsp. sativus] >XP_017229041.1 PREDICTED: rho GTPase-activating protein gacK [Daucus carota subsp. sativus] >KZN12117.1 hypothetical protein DCAR_004773 [Daucus carota subsp. sativus]	Calcium-dependent protein kinase 27 OS=Oryza sativa subsp. japonica GN=CPK27 PE=3 SV=1	Mitotic checkpoint regulator, MAD2B-interacting	[D] KOG3903 Mitotic checkpoint protein PRCC
CL10169.Contig2_All	K13105//proline-rich protein PRCC	PREDICTED: rho GTPase-activating protein gacK [Daucus carota subsp. sativus] >XP_017229040.1 PREDICTED: rho GTPase-activating protein gacK [Daucus carota subsp. sativus] >XP_017229041.1 PREDICTED: rho GTPase-activating protein gacK [Daucus carota subsp. sativus] >KZN12117.1 hypothetical protein DCAR_004773 [Daucus carota subsp. sativus]	Calcium-dependent protein kinase 27 OS=Oryza sativa subsp. japonica GN=CPK27 PE=3 SV=1	Mitotic checkpoint regulator, MAD2B-interacting	[D] KOG3903 Mitotic checkpoint protein PRCC
CL10169.Contig3_All	K13105//proline-rich protein PRCC	PREDICTED: rho GTPase-activating protein gacK [Daucus carota subsp. sativus] >XP_017229040.1 PREDICTED: rho GTPase-activating protein gacK [Daucus carota subsp. sativus] >XP_017229041.1 PREDICTED: rho GTPase-activating protein gacK [Daucus carota subsp. sativus] >KZN12117.1 hypothetical protein DCAR_004773 [Daucus carota subsp. sativus]	Calcium-dependent protein kinase 27 OS=Oryza sativa subsp. japonica GN=CPK27 PE=3 SV=1	Mitotic checkpoint regulator, MAD2B-interacting	[D] KOG3903 Mitotic checkpoint protein PRCC
CL1017.Contig1_All	K20798//small RNA 2'-O-methyltransferase [EC:2.1.1.-]	PREDICTED: uncharacterized membrane protein At1g75140 [Daucus carota subsp. sativus]	Uncharacterized membrane protein At1g75140 OS=Arabidopsis thaliana GN=At1g75140 PE=1 SV=3	Rab3 GTPase-activating protein regulatory subunit N-terminus
CL1017.Contig2_All	K20798//small RNA 2'-O-methyltransferase [EC:2.1.1.-]	PREDICTED: uncharacterized membrane protein At1g75140 [Daucus carota subsp. sativus] >KZM91669.1 hypothetical protein DCAR_020966 [Daucus carota subsp. sativus]	Uncharacterized membrane protein At1g75140 OS=Arabidopsis thaliana GN=At1g75140 PE=1 SV=3	Rab3 GTPase-activating protein regulatory subunit N-terminus
CL1017.Contig3_All	K20798//small RNA 2'-O-methyltransferase [EC:2.1.1.-]	PREDICTED: uncharacterized membrane protein At1g75140 [Daucus carota subsp. sativus] >KZM91669.1 hypothetical protein DCAR_020966 [Daucus carota subsp. sativus]	Uncharacterized membrane protein At1g75140 OS=Arabidopsis thaliana GN=At1g75140 PE=1 SV=3	Rab3 GTPase-activating protein regulatory subunit N-terminus
CL10170.Contig1_All	K17964//leucine-rich PPR motif-containing protein, mitochondrial	PREDICTED: pentatricopeptide repeat-containing protein At3g18110, chloroplastic-like [Daucus carota subsp. sativus]	Pentatricopeptide repeat-containing protein At1g63070, mitochondrial OS=Arabidopsis thaliana GN=At1g63070 PE=2 SV=1	PPR repeat family	[R] KOG4197 FOG: PPR repeat
CL10170.Contig2_All	K17964//leucine-rich PPR motif-containing protein, mitochondrial	PREDICTED: pentatricopeptide repeat-containing protein At3g18110, chloroplastic-like [Daucus carota subsp. sativus]	Pentatricopeptide repeat-containing protein At1g63070, mitochondrial OS=Arabidopsis thaliana GN=At1g63070 PE=2 SV=1	PPR repeat family	[R] KOG4197 FOG: PPR repeat
CL10170.Contig3_All	K00901//diacylglycerol kinase (ATP) [EC:2.7.1.107]+ko01100//Metabolic pathways+ko01110//Biosynthesis of secondary metabolites+ko04070//Phosphatidylinositol signaling system+ko00564//Glycerophospholipid metabolism+ko00561//Glycerolipid metabolism	PREDICTED: diacylglycerol kinase 7 [Daucus carota subsp. sativus] >KZM97925.1 hypothetical protein DCAR_014713 [Daucus carota subsp. sativus]	Diacylglycerol kinase 4 OS=Arabidopsis thaliana GN=DGK4 PE=2 SV=1		[IT] KOG1169 Diacylglycerol kinase
CL10172.Contig1_All	K01913//acetate---CoA ligase [EC:6.2.1.1]+ko00010//Glycolysis / Gluconeogenesis+ko01100//Metabolic pathways+ko01110//Biosynthesis of secondary metabolites+ko00620//Pyruvate metabolism+ko00630//Glyoxylate and dicarboxylate metabolism	PREDICTED: butyrate--CoA ligase AAE11, peroxisomal-like [Daucus carota subsp. sativus]	Probable acyl-activating enzyme 12, peroxisomal OS=Arabidopsis thaliana GN=AAE12 PE=2 SV=1	AMP-binding enzyme	[I] KOG1176 Acyl-CoA synthetase
CL10172.Contig2_All	K01913//acetate---CoA ligase [EC:6.2.1.1]+ko00010//Glycolysis / Gluconeogenesis+ko01100//Metabolic pathways+ko01110//Biosynthesis of secondary metabolites+ko00620//Pyruvate metabolism+ko00630//Glyoxylate and dicarboxylate metabolism	PREDICTED: butyrate--CoA ligase AAE11, peroxisomal-like [Daucus carota subsp. sativus] >KZM98498.1 hypothetical protein DCAR_014140 [Daucus carota subsp. sativus]	Probable acyl-activating enzyme 12, peroxisomal OS=Arabidopsis thaliana GN=AAE12 PE=2 SV=1	AMP-binding enzyme	[I] KOG1176 Acyl-CoA synthetase
CL10173.Contig1_All	K09587//steroid 22-alpha-hydroxylase [EC:1.14.13.-]+ko00905//Brassinosteroid biosynthesis+ko01100//Metabolic pathways+ko01110//Biosynthesis of secondary metabolites	PREDICTED: cytochrome P450 90B1 isoform X2 [Daucus carota subsp. sativus]	Cytochrome P450 90B1 OS=Arabidopsis thaliana GN=CYP90B1 PE=1 SV=2		[QI] KOG0157 Cytochrome P450 CYP4/CYP19/CYP26 subfamilies
CL10175.Contig2_All	K20556//cytochrome P450 family 76 subfamily C;K11979//E3 ubiquitin-protein ligase UBR7 [EC:2.3.2.27]	PREDICTED: geraniol 8-hydroxylase-like [Daucus carota subsp. sativus] >KZN05944.1 hypothetical protein DCAR_006781 [Daucus carota subsp. sativus]	Geraniol 8-hydroxylase OS=Catharanthus roseus GN=CYP76B6 PE=1 SV=1	Cytochrome P450	[Q] KOG0156 Cytochrome P450 CYP2 subfamily
CL10175.Contig3_All	K20556//cytochrome P450 family 76 subfamily C;K00512//steroid 17alpha-monooxygenase / 17alpha-hydroxyprogesterone deacetylase [EC:1.14.14.19 1.14.14.32]+ko01100//Metabolic pathways	PREDICTED: geraniol 8-hydroxylase-like [Daucus carota subsp. sativus] >KZN05944.1 hypothetical protein DCAR_006781 [Daucus carota subsp. sativus]	Geraniol 8-hydroxylase OS=Catharanthus roseus GN=CYP76B6 PE=1 SV=1	Cytochrome P450	[Q] KOG0156 Cytochrome P450 CYP2 subfamily
CL10175.Contig4_All	K11979//E3 ubiquitin-protein ligase UBR7 [EC:2.3.2.27];K20556//cytochrome P450 family 76 subfamily C	PREDICTED: geraniol 8-hydroxylase-like [Daucus carota subsp. sativus] >KZN05944.1 hypothetical protein DCAR_006781 [Daucus carota subsp. sativus]	Geraniol 8-hydroxylase OS=Catharanthus roseus GN=CYP76B6 PE=1 SV=1	Cytochrome P450	[R] KOG2752 Uncharacterized conserved protein, contains N-recognin-type Zn-finger
CL10176.Contig1_All	K02879//large subunit ribosomal protein L17+ko03010//Ribosome	PREDICTED: 50S ribosomal protein L17 [Daucus carota subsp. sativus] >KZM95350.1 hypothetical protein DCAR_018592 [Daucus carota subsp. sativus]	50S ribosomal protein L17, chloroplastic OS=Arabidopsis thaliana GN=RPL17 PE=2 SV=1	Ribosomal protein L17	[J] KOG3280 Mitochondrial/chloroplast ribosomal protein L17
CL10177.Contig1_All	K01662//1-deoxy-D-xylulose-5-phosphate synthase [EC:2.2.1.7]+ko00900//Terpenoid backbone biosynthesis+ko01100//Metabolic pathways+ko01110//Biosynthesis of secondary metabolites+ko00730//Thiamine metabolism	PREDICTED: probable 1-deoxy-D-xylulose-5-phosphate synthase, chloroplastic isoform X1 [Daucus carota subsp. sativus]	Probable 1-deoxy-D-xylulose-5-phosphate synthase, chloroplastic OS=Capsicum annuum GN=TKT2 PE=2 SV=1	1-deoxy-D-xylulose-5-phosphate synthase	[G] KOG0523 Transketolase
CL10177.Contig2_All	K01662//1-deoxy-D-xylulose-5-phosphate synthase [EC:2.2.1.7]+ko00900//Terpenoid backbone biosynthesis+ko01100//Metabolic pathways+ko01110//Biosynthesis of secondary metabolites+ko00730//Thiamine metabolism	PREDICTED: probable 1-deoxy-D-xylulose-5-phosphate synthase, chloroplastic isoform X1 [Daucus carota subsp. sativus]	Probable 1-deoxy-D-xylulose-5-phosphate synthase, chloroplastic OS=Capsicum annuum GN=TKT2 PE=2 SV=1	1-deoxy-D-xylulose-5-phosphate synthase	[G] KOG0523 Transketolase
CL10177.Contig3_All	K01662//1-deoxy-D-xylulose-5-phosphate synthase [EC:2.2.1.7]+ko00900//Terpenoid backbone biosynthesis+ko01100//Metabolic pathways+ko01110//Biosynthesis of secondary metabolites+ko00730//Thiamine metabolism	PREDICTED: probable 1-deoxy-D-xylulose-5-phosphate synthase, chloroplastic isoform X1 [Daucus carota subsp. sativus]	Probable 1-deoxy-D-xylulose-5-phosphate synthase, chloroplastic OS=Capsicum annuum GN=TKT2 PE=2 SV=1	1-deoxy-D-xylulose-5-phosphate synthase	[G] KOG0523 Transketolase
CL10178.Contig1_All		PREDICTED: uncharacterized protein LOC108193229 [Daucus carota subsp. sativus] >XP_017215296.1 PREDICTED: uncharacterized protein LOC108193229 [Daucus carota subsp. sativus] >KZM88331.1 hypothetical protein DCAR_025406 [Daucus carota subsp. sativus]		RING-type zinc-finger
CL10178.Contig2_All		PREDICTED: uncharacterized protein LOC108193229 [Daucus carota subsp. sativus] >XP_017215296.1 PREDICTED: uncharacterized protein LOC108193229 [Daucus carota subsp. sativus] >KZM88331.1 hypothetical protein DCAR_025406 [Daucus carota subsp. sativus]		RING-type zinc-finger
CL10178.Contig3_All		PREDICTED: uncharacterized protein LOC108193229 [Daucus carota subsp. sativus] >XP_017215296.1 PREDICTED: uncharacterized protein LOC108193229 [Daucus carota subsp. sativus] >KZM88331.1 hypothetical protein DCAR_025406 [Daucus carota subsp. sativus]		RING-type zinc-finger
CL10179.Contig1_All		PREDICTED: uncharacterized protein LOC108202746 [Daucus carota subsp. sativus] >KZM82649.1 hypothetical protein DCAR_030218 [Daucus carota subsp. sativus]
CL10179.Contig2_All	K17506//protein phosphatase 1L [EC:3.1.3.16];K21952//CASK-interacting protein	leucine-rich repeat extensin-like protein 4 [Spinacia oleracea] >KNA06197.1 hypothetical protein SOVF_183280 [Spinacia oleracea]	Mulatexin OS=Morus alba PE=1 SV=2		[M] LSE0601 A Pollen extensin-like protein (Pex)
CL1018.Contig1_All	K19891//glucan endo-1,3-beta-glucosidase 1/2/3 [EC:3.2.1.39]+ko00500//Starch and sucrose metabolism;K19892//glucan endo-1,3-beta-glucosidase 4 [EC:3.2.1.39]+ko00500//Starch and sucrose metabolism	Glucan endo-1,3-beta-glucosidase precursor, putative [Ricinus communis]	Glucan endo-1,3-beta-glucosidase 14 OS=Arabidopsis thaliana GN=At2g27500 PE=1 SV=2	Glycosyl hydrolases family 17	[MVG] LSE0111 A beta-1, 3 glucanase
CL1018.Contig2_All	K19891//glucan endo-1,3-beta-glucosidase 1/2/3 [EC:3.2.1.39]+ko00500//Starch and sucrose metabolism;K19892//glucan endo-1,3-beta-glucosidase 4 [EC:3.2.1.39]+ko00500//Starch and sucrose metabolism	Glucan endo-1,3-beta-glucosidase precursor, putative [Ricinus communis]	Glucan endo-1,3-beta-glucosidase 14 OS=Arabidopsis thaliana GN=At2g27500 PE=1 SV=2	Glycosyl hydrolases family 17	[MVG] LSE0111 A beta-1, 3 glucanase
CL10180.Contig10_All	K09872//aquaporin PIP	PREDICTED: aquaporin PIP1-3 [Daucus carota subsp. sativus]	Probable aquaporin PIP1-5 OS=Arabidopsis thaliana GN=PIP1-5 PE=1 SV=2	Major intrinsic protein	[G] KOG0223 Aquaporin (major intrinsic protein family)
CL10180.Contig11_All	K09872//aquaporin PIP	PREDICTED: aquaporin PIP1-3 [Daucus carota subsp. sativus]	Aquaporin PIP1-3 OS=Arabidopsis thaliana GN=PIP1-3 PE=1 SV=1	Major intrinsic protein	[G] KOG0223 Aquaporin (major intrinsic protein family)
CL10180.Contig12_All	K09872//aquaporin PIP	PREDICTED: probable aquaporin PIP1-4 [Daucus carota subsp. sativus]	Probable aquaporin PIP1-5 OS=Arabidopsis thaliana GN=PIP1-5 PE=1 SV=2	Major intrinsic protein	[G] KOG0223 Aquaporin (major intrinsic protein family)
CL10180.Contig13_All	K13148//integrator complex subunit 11 [EC:3.1.27.-]	PREDICTED: E3 ubiquitin-protein ligase At4g11680 [Daucus carota subsp. sativus]	E3 ubiquitin-protein ligase At1g63170 OS=Arabidopsis thaliana GN=At1g63170 PE=2 SV=2	Major intrinsic protein	[O] KOG0800 FOG: Predicted E3 ubiquitin ligase
CL10180.Contig1_All	K09872//aquaporin PIP	PREDICTED: probable aquaporin PIP1-4 [Daucus carota subsp. sativus] >KZM85028.1 hypothetical protein DCAR_027550 [Daucus carota subsp. sativus]	Probable aquaporin PIP1-4 OS=Arabidopsis thaliana GN=PIP1.4 PE=1 SV=1	Major intrinsic protein	[G] KOG0223 Aquaporin (major intrinsic protein family)
CL10180.Contig2_All	K09872//aquaporin PIP	PREDICTED: probable aquaporin PIP1-4 isoform X1 [Daucus carota subsp. sativus] >KZM80554.1 hypothetical protein DCAR_032140 [Daucus carota subsp. sativus]	Probable aquaporin PIP1-4 OS=Arabidopsis thaliana GN=PIP1.4 PE=1 SV=1	Major intrinsic protein	[G] KOG0223 Aquaporin (major intrinsic protein family)
CL10180.Contig3_All	K09872//aquaporin PIP	PREDICTED: aquaporin PIP1-3-like [Daucus carota subsp. sativus] >KZN07950.1 hypothetical protein DCAR_000619 [Daucus carota subsp. sativus]	Probable aquaporin PIP1-4 OS=Arabidopsis thaliana GN=PIP1.4 PE=1 SV=1	Major intrinsic protein	[G] KOG0223 Aquaporin (major intrinsic protein family)
CL10180.Contig4_All	K09872//aquaporin PIP	PREDICTED: aquaporin PIP1-3-like isoform X1 [Daucus carota subsp. sativus] >KZN11971.1 hypothetical protein DCAR_004627 [Daucus carota subsp. sativus]	Aquaporin PIP1-3 OS=Arabidopsis thaliana GN=PIP1-3 PE=1 SV=1	Major intrinsic protein	[G] KOG0223 Aquaporin (major intrinsic protein family)
CL10180.Contig5_All	K09872//aquaporin PIP	aquaporin protein 3 [Camellia sinensis]	Probable aquaporin PIP-type 7a OS=Pisum sativum GN=TRG-31 PE=2 SV=2	Major intrinsic protein	[G] KOG0223 Aquaporin (major intrinsic protein family)
CL10180.Contig6_All	K09872//aquaporin PIP	PREDICTED: probable aquaporin PIP1-4 [Daucus carota subsp. sativus] >KZM85028.1 hypothetical protein DCAR_027550 [Daucus carota subsp. sativus]	Probable aquaporin PIP1-5 OS=Arabidopsis thaliana GN=PIP1-5 PE=1 SV=2	Major intrinsic protein	[G] KOG0223 Aquaporin (major intrinsic protein family)
CL10180.Contig7_All	K09872//aquaporin PIP	PREDICTED: probable aquaporin PIP1-4 [Daucus carota subsp. sativus] >KZM85028.1 hypothetical protein DCAR_027550 [Daucus carota subsp. sativus]	Probable aquaporin PIP1-4 OS=Arabidopsis thaliana GN=PIP1.4 PE=1 SV=1	Major intrinsic protein	[G] KOG0223 Aquaporin (major intrinsic protein family)
CL10180.Contig8_All	K09872//aquaporin PIP	PREDICTED: probable aquaporin PIP1-4 [Daucus carota subsp. sativus] >KZM85028.1 hypothetical protein DCAR_027550 [Daucus carota subsp. sativus]	Probable aquaporin PIP1-4 OS=Arabidopsis thaliana GN=PIP1.4 PE=1 SV=1	Major intrinsic protein	[G] KOG0223 Aquaporin (major intrinsic protein family)
CL10180.Contig9_All	K09872//aquaporin PIP	PREDICTED: aquaporin PIP1-3 [Daucus carota subsp. sativus]	Probable aquaporin PIP1-4 OS=Arabidopsis thaliana GN=PIP1.4 PE=1 SV=1	Major intrinsic protein	[G] KOG0223 Aquaporin (major intrinsic protein family)
CL10181.Contig1_All		PREDICTED: uncharacterized protein LOC108195335 [Daucus carota subsp. sativus] >KZM86165.1 hypothetical protein DCAR_023299 [Daucus carota subsp. sativus]
CL10181.Contig2_All		PREDICTED: uncharacterized protein LOC108195335 [Daucus carota subsp. sativus] >KZM86165.1 hypothetical protein DCAR_023299 [Daucus carota subsp. sativus]		NIPSNAP
CL10182.Contig1_All		PREDICTED: uncharacterized protein LOC108200022 [Daucus carota subsp. sativus]
CL10182.Contig2_All		hypothetical protein BVC80_8585g2 [Macleaya cordata]		Anticodon nuclease activator family
CL10182.Contig3_All		PREDICTED: uncharacterized protein LOC108200022 [Daucus carota subsp. sativus]		Anticodon nuclease activator family
CL10182.Contig4_All				Anticodon nuclease activator family
CL10182.Contig5_All				Anticodon nuclease activator family
CL10182.Contig6_All				Anticodon nuclease activator family
CL10183.Contig1_All	K03671//thioredoxin 1	PREDICTED: thioredoxin O1, mitochondrial-like isoform X2 [Daucus carota subsp. sativus] >KZN08224.1 hypothetical protein DCAR_001289 [Daucus carota subsp. sativus]
CL10183.Contig2_All	K03671//thioredoxin 1	PREDICTED: thioredoxin O1, mitochondrial-like isoform X2 [Daucus carota subsp. sativus] >KZN08224.1 hypothetical protein DCAR_001289 [Daucus carota subsp. sativus]
CL10184.Contig1_All		PREDICTED: uncharacterized protein LOC108224378 [Daucus carota subsp. sativus]	F-box protein At2g16300 OS=Arabidopsis thaliana GN=At2g16300 PE=2 SV=3	Protein of unknown function (DUF295)	[R] LSE0005 A F-box domain
CL10185.Contig1_All	K04733//interleukin-1 receptor-associated kinase 4 [EC:2.7.11.1]	PREDICTED: uncharacterized protein LOC108205494 [Daucus carota subsp. sativus] >KZN11640.1 hypothetical protein DCAR_004296 [Daucus carota subsp. sativus]		PLATZ transcription factor	[R] LSE0429 A B-Box Zn-finger protein
CL10185.Contig2_All	K04733//interleukin-1 receptor-associated kinase 4 [EC:2.7.11.1]	PREDICTED: uncharacterized protein LOC109244367 [Nicotiana attenuata]		PLATZ transcription factor	[R] LSE0429 A B-Box Zn-finger protein
CL10185.Contig3_All	K04733//interleukin-1 receptor-associated kinase 4 [EC:2.7.11.1]	PREDICTED: uncharacterized protein LOC109244367 [Nicotiana attenuata]			[R] LSE0429 A B-Box Zn-finger protein
CL10185.Contig4_All	K04733//interleukin-1 receptor-associated kinase 4 [EC:2.7.11.1]	PREDICTED: uncharacterized protein LOC108205494 [Daucus carota subsp. sativus] >KZN11640.1 hypothetical protein DCAR_004296 [Daucus carota subsp. sativus]			[R] LSE0429 A B-Box Zn-finger protein
CL10186.Contig1_All		hypothetical protein DCAR_021377 [Daucus carota subsp. sativus]		Orbivirus NS3
CL10186.Contig2_All		hypothetical protein DCAR_021377 [Daucus carota subsp. sativus]		Orbivirus NS3
CL10187.Contig1_All	K13648//alpha-1,4-galacturonosyltransferase [EC:2.4.1.43]+ko00520//Amino sugar and nucleotide sugar metabolism	PREDICTED: polygalacturonate 4-alpha-galacturonosyltransferase-like [Daucus carota subsp. sativus]	Polygalacturonate 4-alpha-galacturonosyltransferase OS=Arabidopsis thaliana GN=GAUT1 PE=1 SV=1		[S] LSE0371 A Predicted glycosyltransferase
CL10188.Contig1_All	K15622//myeloid leukemia factor 1	hypothetical protein DCAR_031524 [Daucus carota subsp. sativus]		Myelodysplasia-myeloid leukemia factor 1-interacting protein
CL10188.Contig2_All	K15622//myeloid leukemia factor 1	hypothetical protein DCAR_031524 [Daucus carota subsp. sativus]		Immunoglobulin domain
CL10188.Contig3_All	K15622//myeloid leukemia factor 1	PREDICTED: uncharacterized protein LOC108194050 [Daucus carota subsp. sativus]
CL10188.Contig4_All	K15622//myeloid leukemia factor 1	PREDICTED: uncharacterized protein LOC108194050 [Daucus carota subsp. sativus]		dsRNA-gated channel SID-1
CL10189.Contig1_All	K20769//fatty acid omega-hydroxylase [EC:1.14.-.-]+ko00073//Cutin, suberine and wax biosynthesis;K13407//fatty acid omega-hydroxylase [EC:1.14.-.-]+ko00073//Cutin, suberine and wax biosynthesis	PREDICTED: cytochrome P450 94A2-like [Daucus carota subsp. sativus]	Cytochrome P450 94A2 OS=Vicia sativa GN=CYP94A2 PE=2 SV=1	Cytochrome P450	[QI] KOG0157 Cytochrome P450 CYP4/CYP19/CYP26 subfamilies
CL10189.Contig2_All	K20769//fatty acid omega-hydroxylase [EC:1.14.-.-]+ko00073//Cutin, suberine and wax biosynthesis;K13407//fatty acid omega-hydroxylase [EC:1.14.-.-]+ko00073//Cutin, suberine and wax biosynthesis	PREDICTED: cytochrome P450 94A2-like [Daucus carota subsp. sativus]	Cytochrome P450 94A2 OS=Vicia sativa GN=CYP94A2 PE=2 SV=1	Cytochrome P450	[QI] KOG0157 Cytochrome P450 CYP4/CYP19/CYP26 subfamilies
CL10189.Contig3_All	K12655//OTU domain-containing protein 5 [EC:3.4.19.12]	PREDICTED: OTU domain-containing protein 5 [Daucus carota subsp. sativus] >KZN03457.1 hypothetical protein DCAR_012213 [Daucus carota subsp. sativus]	Cytochrome P450 94A2 OS=Vicia sativa GN=CYP94A2 PE=2 SV=1	Cytochrome P450	[TO] KOG2605 OTU (ovarian tumor)-like cysteine protease
CL1019.Contig10_All	K14850//ribosomal RNA-processing protein 8 [EC:2.1.1.287]	PREDICTED: SAC3 family protein A-like [Daucus carota subsp. sativus]	SAC3 family protein A OS=Arabidopsis thaliana GN=SAC3A PE=1 SV=1	SAC3/GANP family	[K] KOG1861 Leucine permease transcriptional regulator
CL1019.Contig11_All	K14850//ribosomal RNA-processing protein 8 [EC:2.1.1.287]	PREDICTED: SAC3 family protein A-like [Daucus carota subsp. sativus]	SAC3 family protein A OS=Arabidopsis thaliana GN=SAC3A PE=1 SV=1	SAC3/GANP family	[K] KOG1861 Leucine permease transcriptional regulator
CL1019.Contig12_All		PREDICTED: SAC3 family protein A-like [Daucus carota subsp. sativus]	SAC3 family protein A OS=Arabidopsis thaliana GN=SAC3A PE=1 SV=1	SAC3/GANP family	[K] KOG1861 Leucine permease transcriptional regulator
CL1019.Contig13_All		PREDICTED: SAC3 family protein A-like [Daucus carota subsp. sativus]	SAC3 family protein A OS=Arabidopsis thaliana GN=SAC3A PE=1 SV=1	SAC3/GANP family	[K] KOG1861 Leucine permease transcriptional regulator
CL1019.Contig14_All		PREDICTED: SAC3 family protein A-like [Daucus carota subsp. sativus]	SAC3 family protein A OS=Arabidopsis thaliana GN=SAC3A PE=1 SV=1	SAC3/GANP family	[K] KOG1861 Leucine permease transcriptional regulator
CL1019.Contig15_All		PREDICTED: SAC3 family protein A-like [Daucus carota subsp. sativus]	SAC3 family protein A OS=Arabidopsis thaliana GN=SAC3A PE=1 SV=1	SAC3/GANP family	[K] KOG1861 Leucine permease transcriptional regulator
CL1019.Contig16_All		PREDICTED: SAC3 family protein A-like [Daucus carota subsp. sativus]	SAC3 family protein A OS=Arabidopsis thaliana GN=SAC3A PE=1 SV=1	SAC3/GANP family	[K] KOG1861 Leucine permease transcriptional regulator
CL1019.Contig17_All		PREDICTED: SAC3 family protein A-like [Daucus carota subsp. sativus]	SAC3 family protein A OS=Arabidopsis thaliana GN=SAC3A PE=1 SV=1	CSN8/PSMD8/EIF3K family	[K] KOG1861 Leucine permease transcriptional regulator
CL1019.Contig18_All		PREDICTED: SAC3 family protein A-like [Daucus carota subsp. sativus]	SAC3 family protein A OS=Arabidopsis thaliana GN=SAC3A PE=1 SV=1	CSN8/PSMD8/EIF3K family	[K] KOG1861 Leucine permease transcriptional regulator
CL1019.Contig19_All		PREDICTED: SAC3 family protein A-like [Daucus carota subsp. sativus]		Protein of unknown function (DUF4521)
CL1019.Contig1_All	K14850//ribosomal RNA-processing protein 8 [EC:2.1.1.287]	PREDICTED: SAC3 family protein A-like [Daucus carota subsp. sativus]	SAC3 family protein A OS=Arabidopsis thaliana GN=SAC3A PE=1 SV=1	SAC3/GANP family	[K] KOG1861 Leucine permease transcriptional regulator
CL1019.Contig20_All		PREDICTED: SAC3 family protein A-like [Daucus carota subsp. sativus]		Protein of unknown function (DUF4521)
CL1019.Contig21_All		PREDICTED: SAC3 family protein A isoform X2 [Vitis vinifera]	SAC3 family protein A OS=Arabidopsis thaliana GN=SAC3A PE=1 SV=1	SAC3/GANP family	[K] KOG1861 Leucine permease transcriptional regulator
CL1019.Contig22_All		PREDICTED: SAC3 family protein A isoform X2 [Vitis vinifera]	SAC3 family protein A OS=Arabidopsis thaliana GN=SAC3A PE=1 SV=1	SAC3/GANP family	[K] KOG1861 Leucine permease transcriptional regulator
CL1019.Contig2_All				Protein of unknown function (DUF4521)
CL1019.Contig3_All		PREDICTED: SAC3 family protein A-like [Daucus carota subsp. sativus]	SAC3 family protein A OS=Arabidopsis thaliana GN=SAC3A PE=1 SV=1	SAC3/GANP family	[K] KOG1861 Leucine permease transcriptional regulator
CL1019.Contig4_All	K14850//ribosomal RNA-processing protein 8 [EC:2.1.1.287]	PREDICTED: SAC3 family protein A-like [Daucus carota subsp. sativus]	SAC3 family protein A OS=Arabidopsis thaliana GN=SAC3A PE=1 SV=1	SAC3/GANP family	[K] KOG1861 Leucine permease transcriptional regulator
CL1019.Contig5_All		PREDICTED: SAC3 family protein A-like [Daucus carota subsp. sativus]	SAC3 family protein A OS=Arabidopsis thaliana GN=SAC3A PE=1 SV=1	SAC3/GANP family	[K] KOG1861 Leucine permease transcriptional regulator
CL1019.Contig6_All		PREDICTED: SAC3 family protein A-like [Daucus carota subsp. sativus]	SAC3 family protein A OS=Arabidopsis thaliana GN=SAC3A PE=1 SV=1	SAC3/GANP family	[K] KOG1861 Leucine permease transcriptional regulator
CL1019.Contig7_All		PREDICTED: SAC3 family protein A-like [Daucus carota subsp. sativus]	SAC3 family protein A OS=Arabidopsis thaliana GN=SAC3A PE=1 SV=1	SAC3/GANP family	[K] KOG1861 Leucine permease transcriptional regulator
CL1019.Contig8_All	K14850//ribosomal RNA-processing protein 8 [EC:2.1.1.287]	PREDICTED: SAC3 family protein A-like [Daucus carota subsp. sativus]	SAC3 family protein A OS=Arabidopsis thaliana GN=SAC3A PE=1 SV=1	SAC3/GANP family	[K] KOG1861 Leucine permease transcriptional regulator
CL1019.Contig9_All	K14850//ribosomal RNA-processing protein 8 [EC:2.1.1.287]	PREDICTED: SAC3 family protein A-like [Daucus carota subsp. sativus]	SAC3 family protein A OS=Arabidopsis thaliana GN=SAC3A PE=1 SV=1	SAC3/GANP family	[K] KOG1861 Leucine permease transcriptional regulator
CL10191.Contig1_All	K12121//phytochrome B+ko04712//Circadian rhythm - plant	basic proline-rich protein-like [Phalaenopsis equestris]	Glycine-rich cell wall structural protein OS=Arabidopsis thaliana GN=At3g17050 PE=3 SV=2		[ZR] LSE0118 A Protein possibly involved in cytoskeleton rearrangements, contains FH domain
CL10191.Contig2_All	K05747//Wiskott-Aldrich syndrome protein+ko04144//Endocytosis	basic proline-rich protein-like [Phalaenopsis equestris]	Glycine-rich protein 5 OS=Arabidopsis thaliana GN=GRP5 PE=2 SV=1		[M] LSE0601 A Pollen extensin-like protein (Pex)
CL10192.Contig1_All		hypothetical protein CFOL_v3_20035 [Cephalotus follicularis]
CL10192.Contig2_All		PREDICTED: uncharacterized protein LOC108979943 [Juglans regia]
CL10192.Contig3_All		PREDICTED: uncharacterized protein LOC108814916 [Raphanus sativus]
CL10193.Contig1_All	K08999//uncharacterized protein	PREDICTED: bifunctional nuclease 1-like [Daucus carota subsp. sativus] >KZM94283.1 hypothetical protein DCAR_017526 [Daucus carota subsp. sativus]	Bifunctional nuclease 1 OS=Arabidopsis thaliana GN=BBD1 PE=2 SV=1	Bifunctional nuclease
CL10193.Contig2_All	K08999//uncharacterized protein	PREDICTED: bifunctional nuclease 1-like [Daucus carota subsp. sativus] >KZM94283.1 hypothetical protein DCAR_017526 [Daucus carota subsp. sativus]	Bifunctional nuclease 1 OS=Arabidopsis thaliana GN=BBD1 PE=2 SV=1	Bifunctional nuclease
CL10193.Contig3_All	K08999//uncharacterized protein	PREDICTED: bifunctional nuclease 1-like [Daucus carota subsp. sativus] >KZM94283.1 hypothetical protein DCAR_017526 [Daucus carota subsp. sativus]	Bifunctional nuclease 1 OS=Arabidopsis thaliana GN=BBD1 PE=2 SV=1	Bifunctional nuclease
CL10193.Contig4_All	K08999//uncharacterized protein	PREDICTED: bifunctional nuclease 1-like [Daucus carota subsp. sativus] >KZM94283.1 hypothetical protein DCAR_017526 [Daucus carota subsp. sativus]	Bifunctional nuclease 2 OS=Arabidopsis thaliana GN=BBD2 PE=2 SV=1
CL10194.Contig2_All
CL10195.Contig1_All		PREDICTED: uncharacterized protein LOC108211865 [Daucus carota subsp. sativus] >KZN02054.1 hypothetical protein DCAR_010808 [Daucus carota subsp. sativus]
CL10195.Contig2_All		PREDICTED: uncharacterized protein LOC108211865 [Daucus carota subsp. sativus] >KZN02054.1 hypothetical protein DCAR_010808 [Daucus carota subsp. sativus]
CL10196.Contig10_All	K20181//vacuolar protein sorting-associated protein 18	PREDICTED: vacuolar protein sorting-associated protein 18 homolog [Daucus carota subsp. sativus]	UDP-glycosyltransferase 71A15 OS=Malus domestica GN=UGT71A15 PE=1 SV=1	Pep3/Vps18/deep orange family	[U] KOG2034 Vacuolar sorting protein PEP3/VPS18
CL10196.Contig11_All	K20181//vacuolar protein sorting-associated protein 18	PREDICTED: vacuolar protein sorting-associated protein 18 homolog [Daucus carota subsp. sativus]	UDP-glycosyltransferase 71A15 OS=Malus domestica GN=UGT71A15 PE=1 SV=1	Pep3/Vps18/deep orange family	[U] KOG2034 Vacuolar sorting protein PEP3/VPS18
CL10196.Contig12_All	K20181//vacuolar protein sorting-associated protein 18	PREDICTED: vacuolar protein sorting-associated protein 18 homolog [Daucus carota subsp. sativus]		Pep3/Vps18/deep orange family	[U] KOG2034 Vacuolar sorting protein PEP3/VPS18
CL10196.Contig13_All	K20181//vacuolar protein sorting-associated protein 18	PREDICTED: vacuolar protein sorting-associated protein 18 homolog [Daucus carota subsp. sativus]	UDP-glycosyltransferase 71E1 OS=Stevia rebaudiana GN=UGT71E1 PE=2 SV=1	Pep3/Vps18/deep orange family	[U] KOG2034 Vacuolar sorting protein PEP3/VPS18
CL10196.Contig1_All	K20181//vacuolar protein sorting-associated protein 18	PREDICTED: vacuolar protein sorting-associated protein 18 homolog [Daucus carota subsp. sativus]		Pep3/Vps18/deep orange family	[U] KOG2034 Vacuolar sorting protein PEP3/VPS18
CL10196.Contig2_All	K20181//vacuolar protein sorting-associated protein 18	PREDICTED: vacuolar protein sorting-associated protein 18 homolog [Daucus carota subsp. sativus]		Pep3/Vps18/deep orange family	[U] KOG2034 Vacuolar sorting protein PEP3/VPS18
CL10196.Contig3_All	K20181//vacuolar protein sorting-associated protein 18	PREDICTED: vacuolar protein sorting-associated protein 18 homolog [Daucus carota subsp. sativus]		Pep3/Vps18/deep orange family	[U] KOG2034 Vacuolar sorting protein PEP3/VPS18
CL10196.Contig4_All	K20181//vacuolar protein sorting-associated protein 18	PREDICTED: vacuolar protein sorting-associated protein 18 homolog [Daucus carota subsp. sativus]		Pep3/Vps18/deep orange family	[U] KOG2034 Vacuolar sorting protein PEP3/VPS18
CL10196.Contig5_All	K20181//vacuolar protein sorting-associated protein 18	PREDICTED: vacuolar protein sorting-associated protein 18 homolog [Daucus carota subsp. sativus]			[U] KOG2034 Vacuolar sorting protein PEP3/VPS18
CL10196.Contig6_All	K20181//vacuolar protein sorting-associated protein 18	PREDICTED: vacuolar protein sorting-associated protein 18 homolog [Daucus carota subsp. sativus]		Pep3/Vps18/deep orange family	[U] KOG2034 Vacuolar sorting protein PEP3/VPS18
CL10196.Contig7_All	K20181//vacuolar protein sorting-associated protein 18	PREDICTED: vacuolar protein sorting-associated protein 18 homolog [Daucus carota subsp. sativus]		Pep3/Vps18/deep orange family	[U] KOG2034 Vacuolar sorting protein PEP3/VPS18
CL10196.Contig8_All	K20181//vacuolar protein sorting-associated protein 18	PREDICTED: vacuolar protein sorting-associated protein 18 homolog [Daucus carota subsp. sativus]		Pep3/Vps18/deep orange family	[U] KOG2034 Vacuolar sorting protein PEP3/VPS18
CL10196.Contig9_All	K20181//vacuolar protein sorting-associated protein 18	PREDICTED: vacuolar protein sorting-associated protein 18 homolog [Daucus carota subsp. sativus]		Pep3/Vps18/deep orange family	[U] KOG2034 Vacuolar sorting protein PEP3/VPS18
CL10197.Contig1_All	K05396//D-cysteine desulfhydrase [EC:4.4.1.15]+ko00270//Cysteine and methionine metabolism	PREDICTED: D-cysteine desulfhydrase 2, mitochondrial [Daucus carota subsp. sativus]	D-cysteine desulfhydrase 2, mitochondrial OS=Arabidopsis thaliana GN=At3g26115 PE=2 SV=1	Pyridoxal-phosphate dependent enzyme
CL10197.Contig2_All	K05396//D-cysteine desulfhydrase [EC:4.4.1.15]+ko00270//Cysteine and methionine metabolism	PREDICTED: D-cysteine desulfhydrase 2, mitochondrial [Daucus carota subsp. sativus]	D-cysteine desulfhydrase 2, mitochondrial OS=Arabidopsis thaliana GN=At3g26115 PE=2 SV=1	Pyridoxal-phosphate dependent enzyme
CL10197.Contig3_All	K05396//D-cysteine desulfhydrase [EC:4.4.1.15]+ko00270//Cysteine and methionine metabolism	PREDICTED: D-cysteine desulfhydrase 2, mitochondrial [Daucus carota subsp. sativus]	D-cysteine desulfhydrase 2, mitochondrial OS=Arabidopsis thaliana GN=At3g26115 PE=2 SV=1	Phosphoinositide-interacting protein family
CL10197.Contig4_All	K05396//D-cysteine desulfhydrase [EC:4.4.1.15]+ko00270//Cysteine and methionine metabolism	PREDICTED: D-cysteine desulfhydrase 2, mitochondrial [Daucus carota subsp. sativus]	D-cysteine desulfhydrase 2, mitochondrial OS=Arabidopsis thaliana GN=At3g26115 PE=2 SV=1	Pyridoxal-phosphate dependent enzyme
CL10198.Contig1_All
CL102.Contig1_All	K03327//multidrug resistance protein, MATE family	PREDICTED: protein DETOXIFICATION 14-like [Nicotiana attenuata] >OIT29489.1 protein detoxification 14 [Nicotiana attenuata]	Protein DETOXIFICATION 14 OS=Arabidopsis thaliana GN=DTX14 PE=3 SV=1	MatE	[R] KOG1347 Uncharacterized membrane protein, predicted efflux pump
CL102.Contig2_All	K03327//multidrug resistance protein, MATE family	PREDICTED: protein DETOXIFICATION 14-like [Capsicum annuum]	Protein DETOXIFICATION 14 OS=Arabidopsis thaliana GN=DTX14 PE=3 SV=1	MatE	[R] KOG1347 Uncharacterized membrane protein, predicted efflux pump
CL102.Contig3_All	K03327//multidrug resistance protein, MATE family	PREDICTED: protein DETOXIFICATION 14-like [Nicotiana attenuata] >OIT29489.1 protein detoxification 14 [Nicotiana attenuata]	Protein DETOXIFICATION 14 OS=Arabidopsis thaliana GN=DTX14 PE=3 SV=1	MatE	[R] KOG1347 Uncharacterized membrane protein, predicted efflux pump
CL102.Contig5_All	K03327//multidrug resistance protein, MATE family	PREDICTED: protein DETOXIFICATION 14-like [Solanum tuberosum]	Protein DETOXIFICATION 14 OS=Arabidopsis thaliana GN=DTX14 PE=3 SV=1	MatE	[R] KOG1347 Uncharacterized membrane protein, predicted efflux pump
CL102.Contig6_All	K03327//multidrug resistance protein, MATE family	PREDICTED: protein DETOXIFICATION 14-like [Solanum pennellii]	Protein DETOXIFICATION 8 OS=Arabidopsis thaliana GN=DTX8 PE=3 SV=1	MatE	[R] KOG1347 Uncharacterized membrane protein, predicted efflux pump
CL1020.Contig1_All	K14416//elongation factor 1 alpha-like protein+ko03015//mRNA surveillance pathway	PREDICTED: HBS1-like protein isoform X2 [Daucus carota subsp. sativus]	Elongation factor 1-alpha C OS=Porphyra purpurea GN=TEF-C PE=2 SV=1	Elongation factor Tu GTP binding domain	[J] KOG0458 Elongation factor 1 alpha
CL1020.Contig2_All	K14416//elongation factor 1 alpha-like protein+ko03015//mRNA surveillance pathway	PREDICTED: HBS1-like protein isoform X2 [Daucus carota subsp. sativus]	Elongation factor 1-alpha C OS=Porphyra purpurea GN=TEF-C PE=2 SV=1	Elongation factor Tu GTP binding domain	[J] KOG0458 Elongation factor 1 alpha
CL1020.Contig3_All	K14416//elongation factor 1 alpha-like protein+ko03015//mRNA surveillance pathway	PREDICTED: HBS1-like protein isoform X1 [Daucus carota subsp. sativus] >KZN09467.1 hypothetical protein DCAR_002123 [Daucus carota subsp. sativus]	Elongation factor 1-alpha OS=Nicotiana tabacum PE=2 SV=1	Elongation factor Tu C-terminal domain	[J] KOG0458 Elongation factor 1 alpha
CL10200.Contig1_All		PREDICTED: uncharacterized protein LOC108221156 [Daucus carota subsp. sativus]		Peroxisomal biogenesis protein family
CL10200.Contig2_All		PREDICTED: uncharacterized protein LOC108221156 [Daucus carota subsp. sativus]
CL10200.Contig3_All		PREDICTED: uncharacterized protein LOC108221156 [Daucus carota subsp. sativus]
CL10201.Contig1_All	K15363//fanconi-associated nuclease 1 [EC:3.1.21.- 3.1.4.1];K01807//ribose 5-phosphate isomerase A [EC:5.3.1.6]+ko00030//Pentose phosphate pathway+ko01230//Biosynthesis of amino acids+ko01100//Metabolic pathways+ko01110//Biosynthesis of secondary metabolites+ko00710//Carbon fixation in photosynthetic organisms+ko01200//Carbon metabolism	PREDICTED: probable metal-nicotianamine transporter YSL7 isoform X1 [Solanum lycopersicum]	Probable metal-nicotianamine transporter YSL8 OS=Arabidopsis thaliana GN=YSL8 PE=1 SV=2	OPT oligopeptide transporter protein	[PR] TWOG0118 Predicted Fe(III)-siderophore transporter
CL10202.Contig1_All	K12448//UDP-arabinose 4-epimerase [EC:5.1.3.5]+ko00520//Amino sugar and nucleotide sugar metabolism+ko01100//Metabolic pathways	PREDICTED: metal tolerance protein 9-like [Nicotiana sylvestris]	Metal tolerance protein 10 OS=Arabidopsis thaliana GN=MTP10 PE=2 SV=1	Cation efflux family	[P] KOG1485 Mitochondrial Fe2+ transporter MMT1 and related transporters (cation diffusion facilitator superfamily)
CL10202.Contig2_All		PREDICTED: metal tolerance protein 9 [Daucus carota subsp. sativus] >KZN00902.1 hypothetical protein DCAR_009656 [Daucus carota subsp. sativus]	Metal tolerance protein 9 OS=Arabidopsis thaliana GN=MTP9 PE=3 SV=2		[P] KOG1485 Mitochondrial Fe2+ transporter MMT1 and related transporters (cation diffusion facilitator superfamily)
CL10202.Contig3_All		PREDICTED: metal tolerance protein 9 [Daucus carota subsp. sativus] >KZN00902.1 hypothetical protein DCAR_009656 [Daucus carota subsp. sativus]	Metal tolerance protein 9 OS=Arabidopsis thaliana GN=MTP9 PE=3 SV=2		[P] KOG1485 Mitochondrial Fe2+ transporter MMT1 and related transporters (cation diffusion facilitator superfamily)
CL10202.Contig4_All	K12448//UDP-arabinose 4-epimerase [EC:5.1.3.5]+ko00520//Amino sugar and nucleotide sugar metabolism+ko01100//Metabolic pathways	PREDICTED: metal tolerance protein 9-like [Nicotiana sylvestris]	Metal tolerance protein 10 OS=Arabidopsis thaliana GN=MTP10 PE=2 SV=1	Cation efflux family	[P] KOG1485 Mitochondrial Fe2+ transporter MMT1 and related transporters (cation diffusion facilitator superfamily)
CL10202.Contig5_All	K12448//UDP-arabinose 4-epimerase [EC:5.1.3.5]+ko00520//Amino sugar and nucleotide sugar metabolism+ko01100//Metabolic pathways	PREDICTED: metal tolerance protein 9 [Daucus carota subsp. sativus] >KZN00902.1 hypothetical protein DCAR_009656 [Daucus carota subsp. sativus]	Metal tolerance protein 9 OS=Arabidopsis thaliana GN=MTP9 PE=3 SV=2	Cation efflux family	[P] KOG1485 Mitochondrial Fe2+ transporter MMT1 and related transporters (cation diffusion facilitator superfamily)
CL10203.Contig1_All	K07897//Ras-related protein Rab-7A+ko04144//Endocytosis+ko04145//Phagosome	PREDICTED: ras-related protein Rab7-like [Daucus carota subsp. sativus]	Ras-related protein Rab7 OS=Glycine max PE=2 SV=1	Ras family	[R] KOG0394 Ras-related GTPase
CL10203.Contig2_All	K07897//Ras-related protein Rab-7A+ko04144//Endocytosis+ko04145//Phagosome	PREDICTED: ras-related protein Rab7-like [Daucus carota subsp. sativus]	Ras-related protein Rab7 OS=Glycine max PE=2 SV=1	Ras family	[R] KOG0394 Ras-related GTPase
CL10204.Contig1_All
CL10205.Contig1_All	K02717//photosystem II oxygen-evolving enhancer protein 2+ko01100//Metabolic pathways+ko00195//Photosynthesis	PREDICTED: photosynthetic NDH subunit of lumenal location 1, chloroplastic [Daucus carota subsp. sativus] >KZM97428.1 hypothetical protein DCAR_015210 [Daucus carota subsp. sativus]
CL10206.Contig1_All	K13425//WRKY transcription factor 22+ko04016//MAPK signaling pathway - plant+ko04626//Plant-pathogen interaction	PREDICTED: probable WRKY transcription factor 17 [Daucus carota subsp. sativus] >KZM92494.1 hypothetical protein DCAR_020141 [Daucus carota subsp. sativus]	Probable WRKY transcription factor 7 OS=Arabidopsis thaliana GN=WRKY7 PE=1 SV=1	WRKY DNA -binding domain	[KT] LSE0036 A WRKY superfamily transcription factors
CL10206.Contig2_All	K13425//WRKY transcription factor 22+ko04016//MAPK signaling pathway - plant+ko04626//Plant-pathogen interaction	PREDICTED: probable WRKY transcription factor 17 [Daucus carota subsp. sativus] >KZM92494.1 hypothetical protein DCAR_020141 [Daucus carota subsp. sativus]	Probable WRKY transcription factor 7 OS=Arabidopsis thaliana GN=WRKY7 PE=1 SV=1	WRKY DNA -binding domain	[KT] LSE0036 A WRKY superfamily transcription factors
CL10208.Contig1_All	K05657//ATP-binding cassette, subfamily B (MDR/TAP), member 10+ko02010//ABC transporters;K05655//ATP-binding cassette, subfamily B (MDR/TAP), member 8+ko02010//ABC transporters	PREDICTED: ABC transporter B family member 28 [Daucus carota subsp. sativus]	ABC transporter B family member 28 OS=Arabidopsis thaliana GN=ABCB28 PE=2 SV=1	ABC transporter transmembrane region	[Q] KOG0055 Multidrug/pheromone exporter, ABC superfamily
CL10208.Contig2_All	K05657//ATP-binding cassette, subfamily B (MDR/TAP), member 10+ko02010//ABC transporters;K05655//ATP-binding cassette, subfamily B (MDR/TAP), member 8+ko02010//ABC transporters	PREDICTED: ABC transporter B family member 28 [Daucus carota subsp. sativus]	ABC transporter B family member 28 OS=Arabidopsis thaliana GN=ABCB28 PE=2 SV=1	ABC transporter	[Q] KOG0055 Multidrug/pheromone exporter, ABC superfamily
CL10208.Contig3_All	K05657//ATP-binding cassette, subfamily B (MDR/TAP), member 10+ko02010//ABC transporters;K05655//ATP-binding cassette, subfamily B (MDR/TAP), member 8+ko02010//ABC transporters	PREDICTED: ABC transporter B family member 28 [Daucus carota subsp. sativus]	ABC transporter B family member 28 OS=Arabidopsis thaliana GN=ABCB28 PE=2 SV=1	ABC transporter	[Q] KOG0055 Multidrug/pheromone exporter, ABC superfamily
CL10208.Contig4_All	K05657//ATP-binding cassette, subfamily B (MDR/TAP), member 10+ko02010//ABC transporters;K05655//ATP-binding cassette, subfamily B (MDR/TAP), member 8+ko02010//ABC transporters	PREDICTED: ABC transporter B family member 28 [Daucus carota subsp. sativus]	ABC transporter B family member 28 OS=Arabidopsis thaliana GN=ABCB28 PE=2 SV=1	ABC transporter transmembrane region	[Q] KOG0055 Multidrug/pheromone exporter, ABC superfamily
CL10208.Contig5_All	K05657//ATP-binding cassette, subfamily B (MDR/TAP), member 10+ko02010//ABC transporters;K05655//ATP-binding cassette, subfamily B (MDR/TAP), member 8+ko02010//ABC transporters	PREDICTED: uncharacterized protein LOC108223844 [Daucus carota subsp. sativus] >KZM94911.1 hypothetical protein DCAR_018153 [Daucus carota subsp. sativus]	ABC transporter B family member 28 OS=Arabidopsis thaliana GN=ABCB28 PE=2 SV=1		[Q] KOG0055 Multidrug/pheromone exporter, ABC superfamily
CL10209.Contig1_All	K13336//peroxin-3+ko04146//Peroxisome	PREDICTED: peroxisome biogenesis protein 3-1 [Daucus carota subsp. sativus] >KZN02628.1 hypothetical protein DCAR_011382 [Daucus carota subsp. sativus]	Peroxisome biogenesis protein 3-1 OS=Arabidopsis thaliana GN=PEX3-1 PE=2 SV=2	Peroxin-3	[MU] KOG4444 Peroxisomal assembly protein PEX3
CL10209.Contig2_All	K13336//peroxin-3+ko04146//Peroxisome	PREDICTED: peroxisome biogenesis protein 3-1 [Daucus carota subsp. sativus] >KZN02628.1 hypothetical protein DCAR_011382 [Daucus carota subsp. sativus]	Peroxisome biogenesis protein 3-1 OS=Arabidopsis thaliana GN=PEX3-1 PE=2 SV=2	Peroxin-3	[MU] KOG4444 Peroxisomal assembly protein PEX3
CL10209.Contig3_All	K13336//peroxin-3+ko04146//Peroxisome	PREDICTED: peroxisome biogenesis protein 3-1 [Daucus carota subsp. sativus] >KZN02628.1 hypothetical protein DCAR_011382 [Daucus carota subsp. sativus]	Peroxisome biogenesis protein 3-1 OS=Arabidopsis thaliana GN=PEX3-1 PE=2 SV=2	Peroxin-3	[MU] KOG4444 Peroxisomal assembly protein PEX3
CL10209.Contig4_All	K13336//peroxin-3+ko04146//Peroxisome	PREDICTED: peroxisome biogenesis protein 3-1 [Daucus carota subsp. sativus] >KZN02628.1 hypothetical protein DCAR_011382 [Daucus carota subsp. sativus]	Peroxisome biogenesis protein 3-1 OS=Arabidopsis thaliana GN=PEX3-1 PE=2 SV=2	Peroxin-3	[MU] KOG4444 Peroxisomal assembly protein PEX3
CL1021.Contig10_All	K17500//integrin-linked kinase-associated serine/threonine phosphatase 2C [EC:3.1.3.16];K07874//Ras-related protein Rab-1A;K11338//RuvB-like protein 2 [EC:3.6.4.12];K12614//ATP-dependent RNA helicase DDX6/DHH1 [EC:3.6.4.13]+ko03018//RNA degradation	PREDICTED: WAT1-related protein At3g28050-like [Daucus carota subsp. sativus]	Protease Do-like 9 OS=Arabidopsis thaliana GN=DEGP9 PE=1 SV=1	EamA-like transporter family	[O] KOG1320 Serine protease
CL1021.Contig11_All	K17500//integrin-linked kinase-associated serine/threonine phosphatase 2C [EC:3.1.3.16];K07874//Ras-related protein Rab-1A	hypothetical protein DCAR_011225 [Daucus carota subsp. sativus]	WAT1-related protein At3g28050 OS=Arabidopsis thaliana GN=At3g28050 PE=2 SV=1	EamA-like transporter family	[R] LSE0148 A Nodulin-like protein
CL1021.Contig12_All	K17500//integrin-linked kinase-associated serine/threonine phosphatase 2C [EC:3.1.3.16];K12614//ATP-dependent RNA helicase DDX6/DHH1 [EC:3.6.4.13]+ko03018//RNA degradation	PREDICTED: protease Do-like 9 isoform X1 [Daucus carota subsp. sativus]	Protease Do-like 9 OS=Arabidopsis thaliana GN=DEGP9 PE=1 SV=1	Trypsin-like peptidase domain	[O] KOG1320 Serine protease
CL1021.Contig13_All	K17500//integrin-linked kinase-associated serine/threonine phosphatase 2C [EC:3.1.3.16];K12614//ATP-dependent RNA helicase DDX6/DHH1 [EC:3.6.4.13]+ko03018//RNA degradation	PREDICTED: protease Do-like 9 isoform X1 [Daucus carota subsp. sativus]	Protease Do-like 9 OS=Arabidopsis thaliana GN=DEGP9 PE=1 SV=1	Trypsin-like peptidase domain	[O] KOG1320 Serine protease
CL1021.Contig14_All	K17500//integrin-linked kinase-associated serine/threonine phosphatase 2C [EC:3.1.3.16];K12614//ATP-dependent RNA helicase DDX6/DHH1 [EC:3.6.4.13]+ko03018//RNA degradation	hypothetical protein DCAR_011230 [Daucus carota subsp. sativus]	Protease Do-like 9 OS=Arabidopsis thaliana GN=DEGP9 PE=1 SV=1	Trypsin-like peptidase domain	[O] KOG1320 Serine protease
CL1021.Contig15_All	K17500//integrin-linked kinase-associated serine/threonine phosphatase 2C [EC:3.1.3.16];K07874//Ras-related protein Rab-1A;K12614//ATP-dependent RNA helicase DDX6/DHH1 [EC:3.6.4.13]+ko03018//RNA degradation	PREDICTED: WAT1-related protein At3g28050-like [Daucus carota subsp. sativus]	WAT1-related protein At3g28050 OS=Arabidopsis thaliana GN=At3g28050 PE=2 SV=1	EamA-like transporter family	[R] LSE0148 A Nodulin-like protein
CL1021.Contig16_All	K12614//ATP-dependent RNA helicase DDX6/DHH1 [EC:3.6.4.13]+ko03018//RNA degradation;K07874//Ras-related protein Rab-1A	hypothetical protein DCAR_011230 [Daucus carota subsp. sativus]	Protease Do-like 9 OS=Arabidopsis thaliana GN=DEGP9 PE=1 SV=1	Trypsin-like peptidase domain	[O] KOG1320 Serine protease
CL1021.Contig17_All	K17500//integrin-linked kinase-associated serine/threonine phosphatase 2C [EC:3.1.3.16];K12614//ATP-dependent RNA helicase DDX6/DHH1 [EC:3.6.4.13]+ko03018//RNA degradation	PREDICTED: protease Do-like 9 isoform X1 [Daucus carota subsp. sativus]	Protease Do-like 9 OS=Arabidopsis thaliana GN=DEGP9 PE=1 SV=1	Trypsin-like peptidase domain	[O] KOG1320 Serine protease
CL1021.Contig18_All	K17500//integrin-linked kinase-associated serine/threonine phosphatase 2C [EC:3.1.3.16];K12614//ATP-dependent RNA helicase DDX6/DHH1 [EC:3.6.4.13]+ko03018//RNA degradation;K07874//Ras-related protein Rab-1A	PREDICTED: protease Do-like 9, partial [Daucus carota subsp. sativus]	Protease Do-like 9 OS=Arabidopsis thaliana GN=DEGP9 PE=1 SV=1	Trypsin-like peptidase domain	[O] KOG1320 Serine protease
CL1021.Contig19_All	K17500//integrin-linked kinase-associated serine/threonine phosphatase 2C [EC:3.1.3.16];K07874//Ras-related protein Rab-1A	PREDICTED: WAT1-related protein At3g28050-like [Daucus carota subsp. sativus]	WAT1-related protein At3g28050 OS=Arabidopsis thaliana GN=At3g28050 PE=2 SV=1	EamA-like transporter family	[R] LSE0148 A Nodulin-like protein
CL1021.Contig1_All	K12614//ATP-dependent RNA helicase DDX6/DHH1 [EC:3.6.4.13]+ko03018//RNA degradation	PREDICTED: protease Do-like 9 isoform X1 [Daucus carota subsp. sativus]	Protease Do-like 9 OS=Arabidopsis thaliana GN=DEGP9 PE=1 SV=1	PDZ domain	[O] KOG1320 Serine protease
CL1021.Contig20_All	K12614//ATP-dependent RNA helicase DDX6/DHH1 [EC:3.6.4.13]+ko03018//RNA degradation;K11338//RuvB-like protein 2 [EC:3.6.4.12]	PREDICTED: protease Do-like 9 isoform X1 [Daucus carota subsp. sativus]	Protease Do-like 9 OS=Arabidopsis thaliana GN=DEGP9 PE=1 SV=1	Trypsin-like peptidase domain	[O] KOG1320 Serine protease
CL1021.Contig21_All	K12614//ATP-dependent RNA helicase DDX6/DHH1 [EC:3.6.4.13]+ko03018//RNA degradation	PREDICTED: protease Do-like 9 isoform X1 [Daucus carota subsp. sativus]	Protease Do-like 9 OS=Arabidopsis thaliana GN=DEGP9 PE=1 SV=1		[O] KOG1320 Serine protease
CL1021.Contig2_All	K12614//ATP-dependent RNA helicase DDX6/DHH1 [EC:3.6.4.13]+ko03018//RNA degradation	PREDICTED: protease Do-like 9, partial [Daucus carota subsp. sativus]	Protease Do-like 9 OS=Arabidopsis thaliana GN=DEGP9 PE=1 SV=1		[O] KOG1320 Serine protease
CL1021.Contig3_All	K12614//ATP-dependent RNA helicase DDX6/DHH1 [EC:3.6.4.13]+ko03018//RNA degradation	PREDICTED: protease Do-like 9, partial [Daucus carota subsp. sativus]	Protease Do-like 9 OS=Arabidopsis thaliana GN=DEGP9 PE=1 SV=1		[O] KOG1320 Serine protease
CL1021.Contig4_All	K17500//integrin-linked kinase-associated serine/threonine phosphatase 2C [EC:3.1.3.16];K12614//ATP-dependent RNA helicase DDX6/DHH1 [EC:3.6.4.13]+ko03018//RNA degradation;K07874//Ras-related protein Rab-1A	hypothetical protein DCAR_011230 [Daucus carota subsp. sativus]	Protease Do-like 9 OS=Arabidopsis thaliana GN=DEGP9 PE=1 SV=1	Trypsin-like peptidase domain	[O] KOG1320 Serine protease
CL1021.Contig5_All	K17500//integrin-linked kinase-associated serine/threonine phosphatase 2C [EC:3.1.3.16];K12614//ATP-dependent RNA helicase DDX6/DHH1 [EC:3.6.4.13]+ko03018//RNA degradation;K07874//Ras-related protein Rab-1A	PREDICTED: protease Do-like 9, partial [Daucus carota subsp. sativus]	Protease Do-like 9 OS=Arabidopsis thaliana GN=DEGP9 PE=1 SV=1	Trypsin-like peptidase domain	[O] KOG1320 Serine protease
CL1021.Contig6_All	K17500//integrin-linked kinase-associated serine/threonine phosphatase 2C [EC:3.1.3.16];K12614//ATP-dependent RNA helicase DDX6/DHH1 [EC:3.6.4.13]+ko03018//RNA degradation;K07874//Ras-related protein Rab-1A	PREDICTED: protease Do-like 9, partial [Daucus carota subsp. sativus]	Protease Do-like 9 OS=Arabidopsis thaliana GN=DEGP9 PE=1 SV=1	Trypsin-like peptidase domain	[O] KOG1320 Serine protease
CL1021.Contig7_All	K17500//integrin-linked kinase-associated serine/threonine phosphatase 2C [EC:3.1.3.16];K07874//Ras-related protein Rab-1A	hypothetical protein DCAR_011225 [Daucus carota subsp. sativus]	WAT1-related protein At3g28050 OS=Arabidopsis thaliana GN=At3g28050 PE=2 SV=1	EamA-like transporter family	[R] LSE0148 A Nodulin-like protein
CL1021.Contig8_All	K17500//integrin-linked kinase-associated serine/threonine phosphatase 2C [EC:3.1.3.16];K12614//ATP-dependent RNA helicase DDX6/DHH1 [EC:3.6.4.13]+ko03018//RNA degradation	PREDICTED: protease Do-like 9, partial [Daucus carota subsp. sativus]	Protease Do-like 9 OS=Arabidopsis thaliana GN=DEGP9 PE=1 SV=1	Trypsin-like peptidase domain	[O] KOG1320 Serine protease
CL1021.Contig9_All	K17500//integrin-linked kinase-associated serine/threonine phosphatase 2C [EC:3.1.3.16];K12614//ATP-dependent RNA helicase DDX6/DHH1 [EC:3.6.4.13]+ko03018//RNA degradation;K07874//Ras-related protein Rab-1A	PREDICTED: protease Do-like 9, partial [Daucus carota subsp. sativus]	Protease Do-like 9 OS=Arabidopsis thaliana GN=DEGP9 PE=1 SV=1	Trypsin-like peptidase domain	[O] KOG1320 Serine protease
CL10211.Contig1_All	K18172//COX assembly mitochondrial protein 2	PREDICTED: COX assembly mitochondrial protein 2 homolog [Daucus carota subsp. sativus] >KZN09057.1 hypothetical protein DCAR_001713 [Daucus carota subsp. sativus]			[S] KOG4148 Uncharacterized conserved protein
CL10211.Contig2_All	K18172//COX assembly mitochondrial protein 2	PREDICTED: COX assembly mitochondrial protein 2 homolog [Daucus carota subsp. sativus] >KZN09057.1 hypothetical protein DCAR_001713 [Daucus carota subsp. sativus]			[S] KOG4148 Uncharacterized conserved protein
CL10211.Contig3_All	K18172//COX assembly mitochondrial protein 2	PREDICTED: COX assembly mitochondrial protein 2 homolog [Daucus carota subsp. sativus] >KZN09057.1 hypothetical protein DCAR_001713 [Daucus carota subsp. sativus]		Cytochrome c oxidase biogenesis protein Cmc1 like	[S] KOG4148 Uncharacterized conserved protein
CL10211.Contig4_All	K18172//COX assembly mitochondrial protein 2	PREDICTED: COX assembly mitochondrial protein 2 homolog [Daucus carota subsp. sativus] >KZN09057.1 hypothetical protein DCAR_001713 [Daucus carota subsp. sativus]
CL10212.Contig1_All	K10144//RING finger and CHY zinc finger domain-containing protein 1 [EC:2.3.2.27]+ko04120//Ubiquitin mediated proteolysis	PREDICTED: E3 ubiquitin-protein ligase MIEL1 [Daucus carota subsp. sativus] >KZN09793.1 hypothetical protein DCAR_002449 [Daucus carota subsp. sativus]	E3 ubiquitin-protein ligase MIEL1 OS=Arabidopsis thaliana GN=MIEL1 PE=1 SV=1	CHY zinc finger	[R] KOG1940 Zn-finger protein
CL10212.Contig2_All	K10144//RING finger and CHY zinc finger domain-containing protein 1 [EC:2.3.2.27]+ko04120//Ubiquitin mediated proteolysis	PREDICTED: E3 ubiquitin-protein ligase MIEL1 [Daucus carota subsp. sativus] >KZN09793.1 hypothetical protein DCAR_002449 [Daucus carota subsp. sativus]	E3 ubiquitin-protein ligase MIEL1 OS=Arabidopsis thaliana GN=MIEL1 PE=1 SV=1	Zinc-ribbon	[R] KOG1940 Zn-finger protein
CL10213.Contig1_All	K08867//WNK lysine deficient protein kinase [EC:2.7.11.1]	PREDICTED: transcription factor bHLH155-like [Daucus carota subsp. sativus] >KZN09139.1 hypothetical protein DCAR_001795 [Daucus carota subsp. sativus]	Transcription factor EMB1444 OS=Arabidopsis thaliana GN=EMB1444 PE=2 SV=1	bHLH-MYC and R2R3-MYB transcription factors N-terminal	[RK] LSE0475 A Predicted bHLH transcription factor
CL10213.Contig2_All	K08867//WNK lysine deficient protein kinase [EC:2.7.11.1];K13422//transcription factor MYC2+ko04016//MAPK signaling pathway - plant+ko04075//Plant hormone signal transduction	PREDICTED: transcription factor bHLH155-like [Daucus carota subsp. sativus] >KZN09139.1 hypothetical protein DCAR_001795 [Daucus carota subsp. sativus]	Transcription factor bHLH157 OS=Arabidopsis thaliana GN=BHLH157 PE=1 SV=1	bHLH-MYC and R2R3-MYB transcription factors N-terminal	[RK] LSE0475 A Predicted bHLH transcription factor
CL10213.Contig3_All		PREDICTED: transcription factor bHLH155-like [Daucus carota subsp. sativus] >KZN09139.1 hypothetical protein DCAR_001795 [Daucus carota subsp. sativus]	Transcription factor bHLH155 OS=Arabidopsis thaliana GN=BHLH155 PE=1 SV=1		[RK] LSE0475 A Predicted bHLH transcription factor
CL10213.Contig4_All	K08867//WNK lysine deficient protein kinase [EC:2.7.11.1];K13422//transcription factor MYC2+ko04016//MAPK signaling pathway - plant+ko04075//Plant hormone signal transduction	PREDICTED: transcription factor bHLH155-like [Daucus carota subsp. sativus] >KZN09139.1 hypothetical protein DCAR_001795 [Daucus carota subsp. sativus]	Transcription factor EMB1444 OS=Arabidopsis thaliana GN=EMB1444 PE=2 SV=1	bHLH-MYC and R2R3-MYB transcription factors N-terminal	[RK] LSE0475 A Predicted bHLH transcription factor
CL10213.Contig5_All	K08867//WNK lysine deficient protein kinase [EC:2.7.11.1]	PREDICTED: transcription factor bHLH155-like [Daucus carota subsp. sativus] >KZN09139.1 hypothetical protein DCAR_001795 [Daucus carota subsp. sativus]	Transcription factor EMB1444 OS=Arabidopsis thaliana GN=EMB1444 PE=2 SV=1	Bacterial Peptidase A24 N-terminal domain	[RK] LSE0475 A Predicted bHLH transcription factor
CL10214.Contig1_All	K11323//histone arginine demethylase JMJD6 [EC:1.14.11.-];K14306//nuclear pore complex protein Nup62+ko03013//RNA transport	hypothetical protein Csa_2G354810 [Cucumis sativus]			[R] TWOG0097 Protein involved in cell aging
CL10214.Contig2_All	K11323//histone arginine demethylase JMJD6 [EC:1.14.11.-];K14306//nuclear pore complex protein Nup62+ko03013//RNA transport	hypothetical protein Csa_6G302180 [Cucumis sativus]		Radial spoke protein 3	[GO] KOG4157 beta-1,6-N-acetylglucosaminyltransferase, contains WSC domain
CL10216.Contig1_All	K04733//interleukin-1 receptor-associated kinase 4 [EC:2.7.11.1]	hypothetical protein DCAR_019050 [Daucus carota subsp. sativus]	G-type lectin S-receptor-like serine/threonine-protein kinase At4g27290 OS=Arabidopsis thaliana GN=At4g27290 PE=3 SV=4	D-mannose binding lectin	[T] LSE0015 A Receptor-like protein kinase, contains lectin domains
CL10216.Contig2_All	K04733//interleukin-1 receptor-associated kinase 4 [EC:2.7.11.1]	hypothetical protein DCAR_019050 [Daucus carota subsp. sativus]	G-type lectin S-receptor-like serine/threonine-protein kinase At4g27290 OS=Arabidopsis thaliana GN=At4g27290 PE=3 SV=4	S-locus glycoprotein domain	[T] LSE0015 A Receptor-like protein kinase, contains lectin domains
CL10217.Contig1_All	K13680//beta-mannan synthase [EC:2.4.1.32]	PREDICTED: mannan synthase 1-like [Daucus carota subsp. sativus]	Mannan synthase 1 OS=Cyamopsis tetragonoloba GN=ManS PE=1 SV=1		[G] LSE0130 A Glucosyltransferase
CL10217.Contig2_All	K13680//beta-mannan synthase [EC:2.4.1.32]	PREDICTED: mannan synthase 1-like [Daucus carota subsp. sativus]	Mannan synthase 1 OS=Cyamopsis tetragonoloba GN=ManS PE=1 SV=1		[G] LSE0130 A Glucosyltransferase
CL10217.Contig3_All	K13680//beta-mannan synthase [EC:2.4.1.32]	PREDICTED: mannan synthase 1-like [Daucus carota subsp. sativus]	Mannan synthase 1 OS=Cyamopsis tetragonoloba GN=ManS PE=1 SV=1		[G] LSE0130 A Glucosyltransferase
CL10217.Contig4_All	K13680//beta-mannan synthase [EC:2.4.1.32]	PREDICTED: mannan synthase 1-like [Daucus carota subsp. sativus]	Mannan synthase 1 OS=Cyamopsis tetragonoloba GN=ManS PE=1 SV=1	TAP C-terminal domain	[G] LSE0130 A Glucosyltransferase
CL10217.Contig5_All	K13680//beta-mannan synthase [EC:2.4.1.32]	PREDICTED: mannan synthase 1-like [Daucus carota subsp. sativus]	Mannan synthase 1 OS=Cyamopsis tetragonoloba GN=ManS PE=1 SV=1		[G] LSE0130 A Glucosyltransferase
CL10217.Contig6_All	K13680//beta-mannan synthase [EC:2.4.1.32]	PREDICTED: mannan synthase 1-like [Daucus carota subsp. sativus]	Mannan synthase 1 OS=Cyamopsis tetragonoloba GN=ManS PE=1 SV=1	TAP C-terminal domain	[G] LSE0130 A Glucosyltransferase
CL10218.Contig1_All	K17710//pentatricopeptide repeat domain-containing protein 1;K17964//leucine-rich PPR motif-containing protein, mitochondrial	PREDICTED: pentatricopeptide repeat-containing protein At2g31400, chloroplastic [Daucus carota subsp. sativus]	Pentatricopeptide repeat-containing protein At2g31400, chloroplastic OS=Arabidopsis thaliana GN=At2g31400 PE=2 SV=1	PPR repeat family	[R] KOG4197 FOG: PPR repeat
CL10218.Contig2_All	K17710//pentatricopeptide repeat domain-containing protein 1;K17964//leucine-rich PPR motif-containing protein, mitochondrial	PREDICTED: pentatricopeptide repeat-containing protein At2g31400, chloroplastic [Daucus carota subsp. sativus]	Pentatricopeptide repeat-containing protein At2g31400, chloroplastic OS=Arabidopsis thaliana GN=At2g31400 PE=2 SV=1	PPR repeat family	[R] KOG4197 FOG: PPR repeat
CL10219.Contig1_All	K14440//SWI/SNF-related matrix-associated actin-dependent regulator of chromatin subfamily A-like protein 1 [EC:3.6.4.12]	PREDICTED: SWI/SNF-related matrix-associated actin-dependent regulator of chromatin subfamily A-like protein 1 [Daucus carota subsp. sativus]	Protein CHROMATIN REMODELING 4 OS=Arabidopsis thaliana GN=CHR4 PE=2 SV=1	SNF2 family N-terminal domain	[B] KOG1000 Chromatin remodeling protein HARP/SMARCAL1, DEAD-box superfamily
CL10219.Contig2_All	K14440//SWI/SNF-related matrix-associated actin-dependent regulator of chromatin subfamily A-like protein 1 [EC:3.6.4.12]	PREDICTED: SWI/SNF-related matrix-associated actin-dependent regulator of chromatin subfamily A-like protein 1 isoform X1 [Vitis vinifera]	Protein CHROMATIN REMODELING 4 OS=Arabidopsis thaliana GN=CHR4 PE=2 SV=1	SNF2 family N-terminal domain	[B] KOG1000 Chromatin remodeling protein HARP/SMARCAL1, DEAD-box superfamily
CL10219.Contig3_All	K14440//SWI/SNF-related matrix-associated actin-dependent regulator of chromatin subfamily A-like protein 1 [EC:3.6.4.12]	PREDICTED: SWI/SNF-related matrix-associated actin-dependent regulator of chromatin subfamily A-like protein 1 isoform X1 [Vitis vinifera]	Protein CHROMATIN REMODELING 4 OS=Arabidopsis thaliana GN=CHR4 PE=2 SV=1	SNF2 family N-terminal domain	[B] KOG1000 Chromatin remodeling protein HARP/SMARCAL1, DEAD-box superfamily
CL10220.Contig1_All	K10881//26 proteasome complex subunit DSS1+ko03050//Proteasome+ko03440//Homologous recombination	PREDICTED: protein DSS1 HOMOLOG ON CHROMOSOME V-like [Daucus carota subsp. sativus]	Protein DELETION OF SUV3 SUPPRESSOR 1(I) OS=Arabidopsis thaliana GN=DSS1(I) PE=1 SV=1		[S] KOG4764 Uncharacterized conserved protein
CL10220.Contig2_All	K10881//26 proteasome complex subunit DSS1+ko03050//Proteasome+ko03440//Homologous recombination	PREDICTED: protein DSS1 HOMOLOG ON CHROMOSOME V-like [Daucus carota subsp. sativus]	Protein DELETION OF SUV3 SUPPRESSOR 1(I) OS=Arabidopsis thaliana GN=DSS1(I) PE=1 SV=1		[S] KOG4764 Uncharacterized conserved protein
CL10220.Contig3_All	K10881//26 proteasome complex subunit DSS1+ko03050//Proteasome+ko03440//Homologous recombination	PREDICTED: protein DSS1 HOMOLOG ON CHROMOSOME V-like [Daucus carota subsp. sativus]	Protein DELETION OF SUV3 SUPPRESSOR 1(I) OS=Arabidopsis thaliana GN=DSS1(I) PE=1 SV=1		[S] KOG4764 Uncharacterized conserved protein
CL10221.Contig1_All	K21362//galactolipid galactosyltransferase [EC:2.4.1.184]+ko00561//Glycerolipid metabolism;K01802//peptidylprolyl isomerase [EC:5.2.1.8]	PREDICTED: peptidyl-prolyl cis-trans isomerase FKBP17-2, chloroplastic [Daucus carota subsp. sativus] >KZM98628.1 hypothetical protein DCAR_014010 [Daucus carota subsp. sativus]	Peptidyl-prolyl cis-trans isomerase FKBP17-2, chloroplastic OS=Arabidopsis thaliana GN=FKBP17-2 PE=1 SV=1		[O] KOG0552 FKBP-type peptidyl-prolyl cis-trans isomerase
CL10221.Contig2_All	K21362//galactolipid galactosyltransferase [EC:2.4.1.184]+ko00561//Glycerolipid metabolism	PREDICTED: peptidyl-prolyl cis-trans isomerase FKBP17-2, chloroplastic [Daucus carota subsp. sativus] >KZM98628.1 hypothetical protein DCAR_014010 [Daucus carota subsp. sativus]	Peptidyl-prolyl cis-trans isomerase FKBP17-2, chloroplastic OS=Arabidopsis thaliana GN=FKBP17-2 PE=1 SV=1		[O] KOG0552 FKBP-type peptidyl-prolyl cis-trans isomerase
CL10221.Contig3_All	K21362//galactolipid galactosyltransferase [EC:2.4.1.184]+ko00561//Glycerolipid metabolism;K01802//peptidylprolyl isomerase [EC:5.2.1.8]	PREDICTED: peptidyl-prolyl cis-trans isomerase FKBP17-2, chloroplastic [Daucus carota subsp. sativus] >KZM98628.1 hypothetical protein DCAR_014010 [Daucus carota subsp. sativus]	Peptidyl-prolyl cis-trans isomerase FKBP17-2, chloroplastic OS=Arabidopsis thaliana GN=FKBP17-2 PE=1 SV=1	FKBP-type peptidyl-prolyl cis-trans isomerase	[O] KOG0552 FKBP-type peptidyl-prolyl cis-trans isomerase
CL10222.Contig1_All	K02966//small subunit ribosomal protein S19e+ko03010//Ribosome	hypothetical protein DCAR_026009 [Daucus carota subsp. sativus]	40S ribosomal protein S19-3 OS=Arabidopsis thaliana GN=RPS19C PE=2 SV=1	Ribosomal protein S19e	[J] KOG3411 40S ribosomal protein S19
CL10222.Contig2_All	K02966//small subunit ribosomal protein S19e+ko03010//Ribosome	PREDICTED: 40S ribosomal protein S19-3-like [Daucus carota subsp. sativus]	40S ribosomal protein S19-3 OS=Arabidopsis thaliana GN=RPS19C PE=2 SV=1	Ribosomal protein S19e	[J] KOG3411 40S ribosomal protein S19
CL10223.Contig1_All	K00430//peroxidase [EC:1.11.1.7]+ko01100//Metabolic pathways+ko01110//Biosynthesis of secondary metabolites+ko00940//Phenylpropanoid biosynthesis	PREDICTED: peroxidase 51-like [Daucus carota subsp. sativus] >KZN02076.1 hypothetical protein DCAR_010830 [Daucus carota subsp. sativus]	Peroxidase 51 OS=Arabidopsis thaliana GN=PER51 PE=2 SV=1	Peroxidase	[R] TWOG0189 Peroxidase
CL10223.Contig2_All	K00430//peroxidase [EC:1.11.1.7]+ko01100//Metabolic pathways+ko01110//Biosynthesis of secondary metabolites+ko00940//Phenylpropanoid biosynthesis	PREDICTED: peroxidase 51-like [Daucus carota subsp. sativus] >KZN02076.1 hypothetical protein DCAR_010830 [Daucus carota subsp. sativus]	Peroxidase 51 OS=Arabidopsis thaliana GN=PER51 PE=2 SV=1	Peroxidase	[R] TWOG0189 Peroxidase
CL10223.Contig3_All	K00430//peroxidase [EC:1.11.1.7]+ko01100//Metabolic pathways+ko01110//Biosynthesis of secondary metabolites+ko00940//Phenylpropanoid biosynthesis	PREDICTED: peroxidase 51-like [Daucus carota subsp. sativus] >KZN02076.1 hypothetical protein DCAR_010830 [Daucus carota subsp. sativus]	Peroxidase 51 OS=Arabidopsis thaliana GN=PER51 PE=2 SV=1	Peroxidase	[R] TWOG0189 Peroxidase
CL10224.Contig1_All	K02218//casein kinase 1 [EC:2.7.11.1];K06662//cell cycle checkpoint protein;K14318//nuclear pore complex protein Nup88+ko03013//RNA transport	PREDICTED: uncharacterized protein LOC108210942 [Daucus carota subsp. sativus]		DDE superfamily endonuclease	[L] KOG4585 Predicted transposase
CL10224.Contig2_All	K02218//casein kinase 1 [EC:2.7.11.1];K06662//cell cycle checkpoint protein;K14318//nuclear pore complex protein Nup88+ko03013//RNA transport	PREDICTED: uncharacterized protein LOC108210942 [Daucus carota subsp. sativus]		DDE superfamily endonuclease	[L] KOG4585 Predicted transposase
CL10224.Contig3_All	K02218//casein kinase 1 [EC:2.7.11.1];K14318//nuclear pore complex protein Nup88+ko03013//RNA transport;K15334//multisite-specific tRNA:(cytosine-C5)-methyltransferase [EC:2.1.1.202];K01247//DNA-3-methyladenine glycosylase II [EC:3.2.2.21]+ko03410//Base excision repair	PREDICTED: uncharacterized protein LOC108210942 [Daucus carota subsp. sativus]		DDE superfamily endonuclease	[L] KOG4585 Predicted transposase
CL10224.Contig4_All	K02218//casein kinase 1 [EC:2.7.11.1];K14318//nuclear pore complex protein Nup88+ko03013//RNA transport;K15334//multisite-specific tRNA:(cytosine-C5)-methyltransferase [EC:2.1.1.202];K01247//DNA-3-methyladenine glycosylase II [EC:3.2.2.21]+ko03410//Base excision repair	PREDICTED: uncharacterized protein LOC108210942 [Daucus carota subsp. sativus]		DDE superfamily endonuclease	[L] KOG4585 Predicted transposase
CL10225.Contig1_All	K12655//OTU domain-containing protein 5 [EC:3.4.19.12];K16743//abnormal spindle-like microcephaly-associated protein;K13717//OTU domain-containing protein 3 [EC:3.4.19.12]	PREDICTED: OTU domain-containing protein DDB_G0284757 [Daucus carota subsp. sativus] >XP_017258898.1 PREDICTED: OTU domain-containing protein DDB_G0284757 [Daucus carota subsp. sativus] >XP_017258899.1 PREDICTED: OTU domain-containing protein DDB_G0284757 [Daucus carota subsp. sativus] >KZM90818.1 hypothetical protein DCAR_021817 [Daucus carota subsp. sativus]		OTU-like cysteine protease	[TO] KOG2605 OTU (ovarian tumor)-like cysteine protease
CL10225.Contig2_All	K12655//OTU domain-containing protein 5 [EC:3.4.19.12];K16743//abnormal spindle-like microcephaly-associated protein;K13717//OTU domain-containing protein 3 [EC:3.4.19.12]	PREDICTED: OTU domain-containing protein DDB_G0284757 [Daucus carota subsp. sativus] >XP_017258898.1 PREDICTED: OTU domain-containing protein DDB_G0284757 [Daucus carota subsp. sativus] >XP_017258899.1 PREDICTED: OTU domain-containing protein DDB_G0284757 [Daucus carota subsp. sativus] >KZM90818.1 hypothetical protein DCAR_021817 [Daucus carota subsp. sativus]		OTU-like cysteine protease	[TO] KOG2605 OTU (ovarian tumor)-like cysteine protease
CL10225.Contig3_All	K12655//OTU domain-containing protein 5 [EC:3.4.19.12];K16743//abnormal spindle-like microcephaly-associated protein;K13717//OTU domain-containing protein 3 [EC:3.4.19.12]	PREDICTED: OTU domain-containing protein DDB_G0284757 [Daucus carota subsp. sativus] >XP_017258898.1 PREDICTED: OTU domain-containing protein DDB_G0284757 [Daucus carota subsp. sativus] >XP_017258899.1 PREDICTED: OTU domain-containing protein DDB_G0284757 [Daucus carota subsp. sativus] >KZM90818.1 hypothetical protein DCAR_021817 [Daucus carota subsp. sativus]		OTU-like cysteine protease	[TO] KOG2605 OTU (ovarian tumor)-like cysteine protease
CL10225.Contig4_All	K12655//OTU domain-containing protein 5 [EC:3.4.19.12];K16743//abnormal spindle-like microcephaly-associated protein	PREDICTED: OTU domain-containing protein DDB_G0284757 [Daucus carota subsp. sativus] >XP_017258898.1 PREDICTED: OTU domain-containing protein DDB_G0284757 [Daucus carota subsp. sativus] >XP_017258899.1 PREDICTED: OTU domain-containing protein DDB_G0284757 [Daucus carota subsp. sativus] >KZM90818.1 hypothetical protein DCAR_021817 [Daucus carota subsp. sativus]		OTU-like cysteine protease	[TO] KOG2605 OTU (ovarian tumor)-like cysteine protease
CL10225.Contig5_All	K12655//OTU domain-containing protein 5 [EC:3.4.19.12];K16743//abnormal spindle-like microcephaly-associated protein	PREDICTED: OTU domain-containing protein DDB_G0284757 [Daucus carota subsp. sativus] >XP_017258898.1 PREDICTED: OTU domain-containing protein DDB_G0284757 [Daucus carota subsp. sativus] >XP_017258899.1 PREDICTED: OTU domain-containing protein DDB_G0284757 [Daucus carota subsp. sativus] >KZM90818.1 hypothetical protein DCAR_021817 [Daucus carota subsp. sativus]		OTU-like cysteine protease	[TO] KOG2605 OTU (ovarian tumor)-like cysteine protease
CL10226.Contig1_All		PREDICTED: uncharacterized protein LOC108218567 [Daucus carota subsp. sativus] >XP_017247050.1 PREDICTED: uncharacterized protein LOC108218567 [Daucus carota subsp. sativus] >KZM98884.1 hypothetical protein DCAR_013754 [Daucus carota subsp. sativus]
CL10226.Contig2_All		PREDICTED: uncharacterized protein LOC108218567 [Daucus carota subsp. sativus] >XP_017247050.1 PREDICTED: uncharacterized protein LOC108218567 [Daucus carota subsp. sativus] >KZM98884.1 hypothetical protein DCAR_013754 [Daucus carota subsp. sativus]
CL10227.Contig1_All	K14826//FK506-binding nuclear protein [EC:5.2.1.8];K09571//FK506-binding protein 4/5 [EC:5.2.1.8]	PREDICTED: peptidyl-prolyl cis-trans isomerase FKBP17-1, chloroplastic isoform X1 [Daucus carota subsp. sativus] >KZN11135.1 hypothetical protein DCAR_003791 [Daucus carota subsp. sativus]	Peptidyl-prolyl cis-trans isomerase FKBP17-1, chloroplastic OS=Arabidopsis thaliana GN=FKBP17-1 PE=2 SV=1	FKBP-type peptidyl-prolyl cis-trans isomerase	[O] KOG0552 FKBP-type peptidyl-prolyl cis-trans isomerase
CL10227.Contig2_All	K14826//FK506-binding nuclear protein [EC:5.2.1.8]	PREDICTED: peptidyl-prolyl cis-trans isomerase FKBP17-1, chloroplastic isoform X1 [Daucus carota subsp. sativus] >KZN11135.1 hypothetical protein DCAR_003791 [Daucus carota subsp. sativus]	Peptidyl-prolyl cis-trans isomerase FKBP17-1, chloroplastic OS=Arabidopsis thaliana GN=FKBP17-1 PE=2 SV=1	FKBP-type peptidyl-prolyl cis-trans isomerase	[O] KOG0552 FKBP-type peptidyl-prolyl cis-trans isomerase
CL10227.Contig3_All	K14826//FK506-binding nuclear protein [EC:5.2.1.8]	PREDICTED: peptidyl-prolyl cis-trans isomerase FKBP17-1, chloroplastic isoform X1 [Daucus carota subsp. sativus] >KZN11135.1 hypothetical protein DCAR_003791 [Daucus carota subsp. sativus]	Peptidyl-prolyl cis-trans isomerase FKBP17-1, chloroplastic OS=Arabidopsis thaliana GN=FKBP17-1 PE=2 SV=1	FKBP-type peptidyl-prolyl cis-trans isomerase	[O] KOG0552 FKBP-type peptidyl-prolyl cis-trans isomerase
CL10227.Contig4_All	K14826//FK506-binding nuclear protein [EC:5.2.1.8];K09571//FK506-binding protein 4/5 [EC:5.2.1.8]	PREDICTED: peptidyl-prolyl cis-trans isomerase FKBP17-1, chloroplastic isoform X2 [Daucus carota subsp. sativus]	Peptidyl-prolyl cis-trans isomerase FKBP17-1, chloroplastic OS=Arabidopsis thaliana GN=FKBP17-1 PE=2 SV=1	FKBP-type peptidyl-prolyl cis-trans isomerase	[O] KOG0552 FKBP-type peptidyl-prolyl cis-trans isomerase
CL10228.Contig1_All		PREDICTED: uncharacterized protein LOC108204747 [Daucus carota subsp. sativus]		Zinc finger, C3HC4 type (RING finger)	[O] KOG1039 Predicted E3 ubiquitin ligase
CL10228.Contig2_All		PREDICTED: uncharacterized protein LOC108204747 [Daucus carota subsp. sativus]		Zinc finger, C3HC4 type (RING finger)	[O] KOG1039 Predicted E3 ubiquitin ligase
CL10228.Contig3_All		PREDICTED: uncharacterized protein LOC108209700 isoform X1 [Daucus carota subsp. sativus]		Zinc finger, C3HC4 type (RING finger)	[O] KOG1039 Predicted E3 ubiquitin ligase
CL10229.Contig1_All	K08737//DNA mismatch repair protein MSH6+ko03430//Mismatch repair	hypothetical protein DCAR_010445 [Daucus carota subsp. sativus]	DNA mismatch repair protein MSH7 OS=Arabidopsis thaliana GN=MSH7 PE=1 SV=1	MutS domain V	[L] KOG0217 Mismatch repair ATPase MSH6 (MutS family)
CL10229.Contig2_All	K08737//DNA mismatch repair protein MSH6+ko03430//Mismatch repair	hypothetical protein DCAR_010445 [Daucus carota subsp. sativus]	DNA mismatch repair protein MSH7 OS=Arabidopsis thaliana GN=MSH7 PE=1 SV=1	MutS domain V	[L] KOG0217 Mismatch repair ATPase MSH6 (MutS family)
CL1023.Contig10_All		PREDICTED: zinc finger MYND domain-containing protein 15 [Daucus carota subsp. sativus]		Sjogren's syndrome/scleroderma autoantigen 1 (Autoantigen p27)
CL1023.Contig11_All		PREDICTED: zinc finger MYND domain-containing protein 15 [Daucus carota subsp. sativus]
CL1023.Contig12_All		PREDICTED: zinc finger MYND domain-containing protein 15 [Daucus carota subsp. sativus]		Sjogren's syndrome/scleroderma autoantigen 1 (Autoantigen p27)
CL1023.Contig13_All		PREDICTED: zinc finger MYND domain-containing protein 15 [Daucus carota subsp. sativus]
CL1023.Contig14_All		PREDICTED: zinc finger MYND domain-containing protein 15 [Daucus carota subsp. sativus]
CL1023.Contig15_All		PREDICTED: zinc finger MYND domain-containing protein 15 [Daucus carota subsp. sativus]
CL1023.Contig16_All		PREDICTED: zinc finger MYND domain-containing protein 15 [Daucus carota subsp. sativus]		Sjogren's syndrome/scleroderma autoantigen 1 (Autoantigen p27)
CL1023.Contig17_All		PREDICTED: zinc finger MYND domain-containing protein 15 [Daucus carota subsp. sativus]
CL1023.Contig18_All		PREDICTED: zinc finger MYND domain-containing protein 15 [Daucus carota subsp. sativus]
CL1023.Contig1_All	K11855//ubiquitin carboxyl-terminal hydrolase 36/42 [EC:3.4.19.12]	PREDICTED: zinc finger MYND domain-containing protein 15 [Daucus carota subsp. sativus]		MYND finger
CL1023.Contig2_All	K11855//ubiquitin carboxyl-terminal hydrolase 36/42 [EC:3.4.19.12]	PREDICTED: zinc finger MYND domain-containing protein 15 [Daucus carota subsp. sativus]		MYND finger
CL1023.Contig3_All	K11855//ubiquitin carboxyl-terminal hydrolase 36/42 [EC:3.4.19.12]	PREDICTED: zinc finger MYND domain-containing protein 15 [Daucus carota subsp. sativus]		MYND finger
CL1023.Contig4_All	K11855//ubiquitin carboxyl-terminal hydrolase 36/42 [EC:3.4.19.12]	PREDICTED: zinc finger MYND domain-containing protein 15 [Daucus carota subsp. sativus]		MYND finger
CL1023.Contig5_All	K11855//ubiquitin carboxyl-terminal hydrolase 36/42 [EC:3.4.19.12]	PREDICTED: zinc finger MYND domain-containing protein 15 [Daucus carota subsp. sativus]		MYND finger
CL1023.Contig6_All		PREDICTED: zinc finger MYND domain-containing protein 15 [Daucus carota subsp. sativus]
CL1023.Contig7_All		PREDICTED: zinc finger MYND domain-containing protein 15 [Daucus carota subsp. sativus]
CL1023.Contig8_All	K11855//ubiquitin carboxyl-terminal hydrolase 36/42 [EC:3.4.19.12]	PREDICTED: zinc finger MYND domain-containing protein 15 [Daucus carota subsp. sativus]		MYND finger
CL1023.Contig9_All		PREDICTED: zinc finger MYND domain-containing protein 15 [Daucus carota subsp. sativus]
CL10230.Contig1_All	K03354//anaphase-promoting complex subunit 7+ko04120//Ubiquitin mediated proteolysis	PREDICTED: anaphase-promoting complex subunit 7 [Daucus carota subsp. sativus]	Anaphase-promoting complex subunit 7 OS=Arabidopsis thaliana GN=APC7 PE=2 SV=1	Tetratricopeptide repeat	[DO] KOG1174 Anaphase-promoting complex (APC), subunit 7
CL10230.Contig2_All	K03354//anaphase-promoting complex subunit 7+ko04120//Ubiquitin mediated proteolysis	hypothetical protein DCAR_027096 [Daucus carota subsp. sativus]	Anaphase-promoting complex subunit 7 OS=Arabidopsis thaliana GN=APC7 PE=2 SV=1	Tetratricopeptide repeat	[DO] KOG1174 Anaphase-promoting complex (APC), subunit 7
CL10230.Contig3_All	K03354//anaphase-promoting complex subunit 7+ko04120//Ubiquitin mediated proteolysis	PREDICTED: anaphase-promoting complex subunit 7 [Daucus carota subsp. sativus]	Anaphase-promoting complex subunit 7 OS=Arabidopsis thaliana GN=APC7 PE=2 SV=1	Tetratricopeptide repeat	[DO] KOG1174 Anaphase-promoting complex (APC), subunit 7
CL10230.Contig4_All	K03354//anaphase-promoting complex subunit 7+ko04120//Ubiquitin mediated proteolysis	PREDICTED: anaphase-promoting complex subunit 7 [Daucus carota subsp. sativus]	Anaphase-promoting complex subunit 7 OS=Arabidopsis thaliana GN=APC7 PE=2 SV=1	Tetratricopeptide repeat	[DO] KOG1174 Anaphase-promoting complex (APC), subunit 7
CL10230.Contig5_All	K03354//anaphase-promoting complex subunit 7+ko04120//Ubiquitin mediated proteolysis	PREDICTED: anaphase-promoting complex subunit 7 [Daucus carota subsp. sativus]	Anaphase-promoting complex subunit 7 OS=Arabidopsis thaliana GN=APC7 PE=2 SV=1	Tetratricopeptide repeat	[DO] KOG1174 Anaphase-promoting complex (APC), subunit 7
CL10230.Contig6_All	K03354//anaphase-promoting complex subunit 7+ko04120//Ubiquitin mediated proteolysis	hypothetical protein DCAR_027096 [Daucus carota subsp. sativus]	Anaphase-promoting complex subunit 7 OS=Arabidopsis thaliana GN=APC7 PE=2 SV=1		[DO] KOG1174 Anaphase-promoting complex (APC), subunit 7
CL10232.Contig1_All	K14772//U3 small nucleolar RNA-associated protein 20	PREDICTED: uncharacterized protein LOC108218957 [Daucus carota subsp. sativus]		ubiE/COQ5 methyltransferase family	[V] KOG1823 DRIM (Down-regulated in metastasis)-like proteins
CL10232.Contig2_All	K14772//U3 small nucleolar RNA-associated protein 20	PREDICTED: uncharacterized protein LOC108218957 [Daucus carota subsp. sativus]		ubiE/COQ5 methyltransferase family	[V] KOG1823 DRIM (Down-regulated in metastasis)-like proteins
CL10232.Contig3_All	K14772//U3 small nucleolar RNA-associated protein 20	PREDICTED: uncharacterized protein LOC108218957 [Daucus carota subsp. sativus]
CL10233.Contig1_All		PREDICTED: DDT domain-containing protein DDR4 [Daucus carota subsp. sativus]	DDT domain-containing protein DDR4 OS=Arabidopsis thaliana GN=DDR4 PE=1 SV=1	DDT domain
CL10233.Contig2_All	K14572//midasin+ko03008//Ribosome biogenesis in eukaryotes;K17046//protein DEK;K15923//alpha-L-fucosidase 2 [EC:3.2.1.51]+ko00511//Other glycan degradation	PREDICTED: DDT domain-containing protein DDR4 [Daucus carota subsp. sativus]	DDT domain-containing protein DDR4 OS=Arabidopsis thaliana GN=DDR4 PE=1 SV=1	DDT domain	[S] KOG4023 Uncharacterized conserved protein
CL10234.Contig1_All	K20308//trafficking protein particle complex subunit 11	PREDICTED: trafficking protein particle complex subunit 11 [Daucus carota subsp. sativus] >KZM98518.1 hypothetical protein DCAR_014120 [Daucus carota subsp. sativus]		Foie gras liver health family 1	[S] KOG4386 Uncharacterized conserved protein
CL10234.Contig2_All	K20308//trafficking protein particle complex subunit 11	PREDICTED: trafficking protein particle complex subunit 11 [Daucus carota subsp. sativus] >KZM98518.1 hypothetical protein DCAR_014120 [Daucus carota subsp. sativus]		Foie gras liver health family 1	[S] KOG4386 Uncharacterized conserved protein
CL10237.Contig1_All	K08914//light-harvesting complex II chlorophyll a/b binding protein 3+ko01100//Metabolic pathways+ko00196//Photosynthesis - antenna proteins	PREDICTED: chlorophyll a-b binding protein 13, chloroplastic [Daucus carota subsp. sativus] >AAF20948.1 chlorophyll a/b-binding protein [Daucus carota]	Chlorophyll a-b binding protein 13, chloroplastic OS=Solanum lycopersicum GN=CAB13 PE=1 SV=1	Chlorophyll A-B binding protein	[C] LSE0391 A Chlorophyll A/B binding protein
CL10237.Contig2_All	K08914//light-harvesting complex II chlorophyll a/b binding protein 3+ko01100//Metabolic pathways+ko00196//Photosynthesis - antenna proteins	PREDICTED: chlorophyll a-b binding protein 13, chloroplastic [Daucus carota subsp. sativus] >AAF20948.1 chlorophyll a/b-binding protein [Daucus carota]	Chlorophyll a-b binding protein 13, chloroplastic OS=Solanum lycopersicum GN=CAB13 PE=1 SV=1	Chlorophyll A-B binding protein	[C] LSE0391 A Chlorophyll A/B binding protein
CL10237.Contig3_All	K08914//light-harvesting complex II chlorophyll a/b binding protein 3+ko01100//Metabolic pathways+ko00196//Photosynthesis - antenna proteins	PREDICTED: chlorophyll a-b binding protein 13, chloroplastic [Daucus carota subsp. sativus] >AAF20948.1 chlorophyll a/b-binding protein [Daucus carota]	Chlorophyll a-b binding protein 13, chloroplastic OS=Solanum lycopersicum GN=CAB13 PE=1 SV=1	Chlorophyll A-B binding protein	[C] LSE0391 A Chlorophyll A/B binding protein
CL10238.Contig1_All	K07767//katanin p60 ATPase-containing subunit A1 [EC:3.6.4.3]	PREDICTED: katanin p60 ATPase-containing subunit A1 [Daucus carota subsp. sativus]	Katanin p60 ATPase-containing subunit A1 OS=Arabidopsis thaliana GN=AAA1 PE=1 SV=1	ATPase family associated with various cellular activities (AAA)	[O] KOG0738 AAA+-type ATPase
CL10238.Contig2_All	K07767//katanin p60 ATPase-containing subunit A1 [EC:3.6.4.3]	PREDICTED: katanin p60 ATPase-containing subunit A1 [Daucus carota subsp. sativus]	Katanin p60 ATPase-containing subunit A1 OS=Arabidopsis thaliana GN=AAA1 PE=1 SV=1	ATPase family associated with various cellular activities (AAA)	[O] KOG0738 AAA+-type ATPase
CL10238.Contig3_All	K07767//katanin p60 ATPase-containing subunit A1 [EC:3.6.4.3]	PREDICTED: katanin p60 ATPase-containing subunit A1 [Daucus carota subsp. sativus]	Katanin p60 ATPase-containing subunit A1 OS=Arabidopsis thaliana GN=AAA1 PE=1 SV=1	ATPase family associated with various cellular activities (AAA)	[O] KOG0738 AAA+-type ATPase
CL10239.Contig1_All	K03549//KUP system potassium uptake protein	PREDICTED: potassium transporter 25-like isoform X1 [Daucus carota subsp. sativus]	Potassium transporter 10 OS=Oryza sativa subsp. japonica GN=HAK10 PE=2 SV=1	K+ potassium transporter	[P] LSE0144 A Potassium transporter
CL10239.Contig2_All	K03549//KUP system potassium uptake protein	PREDICTED: potassium transporter 25-like isoform X1 [Daucus carota subsp. sativus]	Potassium transporter 10 OS=Oryza sativa subsp. japonica GN=HAK10 PE=2 SV=1	K+ potassium transporter	[P] LSE0144 A Potassium transporter
CL10239.Contig3_All	K03549//KUP system potassium uptake protein;K12236//transcriptional repressor NF-X1	PREDICTED: potassium transporter 25-like isoform X2 [Daucus carota subsp. sativus]	Potassium transporter 10 OS=Oryza sativa subsp. japonica GN=HAK10 PE=2 SV=1	K+ potassium transporter	[P] LSE0144 A Potassium transporter
CL10239.Contig4_All	K03549//KUP system potassium uptake protein	PREDICTED: potassium transporter 25-like isoform X1 [Daucus carota subsp. sativus]	Potassium transporter 10 OS=Oryza sativa subsp. japonica GN=HAK10 PE=2 SV=1	K+ potassium transporter	[P] LSE0144 A Potassium transporter
CL1024.Contig10_All	K04733//interleukin-1 receptor-associated kinase 4 [EC:2.7.11.1]	PREDICTED: G-type lectin S-receptor-like serine/threonine-protein kinase At4g27290 [Daucus carota subsp. sativus]	G-type lectin S-receptor-like serine/threonine-protein kinase At4g27290 OS=Arabidopsis thaliana GN=At4g27290 PE=3 SV=4	Protein tyrosine kinase	[T] LSE0015 A Receptor-like protein kinase, contains lectin domains
CL1024.Contig11_All	K04733//interleukin-1 receptor-associated kinase 4 [EC:2.7.11.1]	PREDICTED: G-type lectin S-receptor-like serine/threonine-protein kinase At4g27290 [Daucus carota subsp. sativus]	Receptor-like serine/threonine-protein kinase SD1-6 OS=Arabidopsis thaliana GN=SD16 PE=1 SV=2	Protein tyrosine kinase	[T] LSE0015 A Receptor-like protein kinase, contains lectin domains
CL1024.Contig12_All	K04733//interleukin-1 receptor-associated kinase 4 [EC:2.7.11.1]	PREDICTED: G-type lectin S-receptor-like serine/threonine-protein kinase At4g27290 [Daucus carota subsp. sativus]	G-type lectin S-receptor-like serine/threonine-protein kinase At4g27290 OS=Arabidopsis thaliana GN=At4g27290 PE=3 SV=4	D-mannose binding lectin	[T] LSE0015 A Receptor-like protein kinase, contains lectin domains
CL1024.Contig13_All	K04733//interleukin-1 receptor-associated kinase 4 [EC:2.7.11.1]	PREDICTED: G-type lectin S-receptor-like serine/threonine-protein kinase At4g27290 [Daucus carota subsp. sativus]	G-type lectin S-receptor-like serine/threonine-protein kinase At4g27290 OS=Arabidopsis thaliana GN=At4g27290 PE=3 SV=4	Protein tyrosine kinase	[T] LSE0015 A Receptor-like protein kinase, contains lectin domains
CL1024.Contig14_All	K04733//interleukin-1 receptor-associated kinase 4 [EC:2.7.11.1]	PREDICTED: G-type lectin S-receptor-like serine/threonine-protein kinase At4g27290 [Daucus carota subsp. sativus]	Receptor-like serine/threonine-protein kinase SD1-6 OS=Arabidopsis thaliana GN=SD16 PE=1 SV=2	Protein tyrosine kinase	[T] LSE0015 A Receptor-like protein kinase, contains lectin domains
CL1024.Contig15_All	K04733//interleukin-1 receptor-associated kinase 4 [EC:2.7.11.1]	PREDICTED: G-type lectin S-receptor-like serine/threonine-protein kinase At4g27290 [Daucus carota subsp. sativus]	Receptor-like serine/threonine-protein kinase SD1-8 OS=Arabidopsis thaliana GN=SD18 PE=1 SV=1	Protein tyrosine kinase	[T] LSE0015 A Receptor-like protein kinase, contains lectin domains
CL1024.Contig16_All	K04733//interleukin-1 receptor-associated kinase 4 [EC:2.7.11.1]	PREDICTED: G-type lectin S-receptor-like serine/threonine-protein kinase At4g27290 [Daucus carota subsp. sativus]	G-type lectin S-receptor-like serine/threonine-protein kinase SD1-1 OS=Arabidopsis thaliana GN=SD11 PE=1 SV=1	D-mannose binding lectin	[T] LSE0015 A Receptor-like protein kinase, contains lectin domains
CL1024.Contig17_All	K04733//interleukin-1 receptor-associated kinase 4 [EC:2.7.11.1]	PREDICTED: G-type lectin S-receptor-like serine/threonine-protein kinase At4g27290 [Daucus carota subsp. sativus]	Receptor-like serine/threonine-protein kinase SD1-7 OS=Arabidopsis thaliana GN=SD17 PE=1 SV=1	Protein tyrosine kinase	[T] LSE0015 A Receptor-like protein kinase, contains lectin domains
CL1024.Contig18_All	K04733//interleukin-1 receptor-associated kinase 4 [EC:2.7.11.1]	PREDICTED: G-type lectin S-receptor-like serine/threonine-protein kinase At4g27290 [Daucus carota subsp. sativus]	G-type lectin S-receptor-like serine/threonine-protein kinase SD1-1 OS=Arabidopsis thaliana GN=SD11 PE=1 SV=1	Protein tyrosine kinase	[T] LSE0015 A Receptor-like protein kinase, contains lectin domains
CL1024.Contig19_All	K04733//interleukin-1 receptor-associated kinase 4 [EC:2.7.11.1]	PREDICTED: G-type lectin S-receptor-like serine/threonine-protein kinase At4g27290 [Daucus carota subsp. sativus]	G-type lectin S-receptor-like serine/threonine-protein kinase At4g27290 OS=Arabidopsis thaliana GN=At4g27290 PE=3 SV=4	Protein tyrosine kinase	[T] LSE0015 A Receptor-like protein kinase, contains lectin domains
CL1024.Contig1_All	K04733//interleukin-1 receptor-associated kinase 4 [EC:2.7.11.1]	PREDICTED: G-type lectin S-receptor-like serine/threonine-protein kinase At4g27290 [Daucus carota subsp. sativus]	Receptor-like serine/threonine-protein kinase SD1-8 OS=Arabidopsis thaliana GN=SD18 PE=1 SV=1	Protein tyrosine kinase	[T] LSE0015 A Receptor-like protein kinase, contains lectin domains
CL1024.Contig20_All	K04733//interleukin-1 receptor-associated kinase 4 [EC:2.7.11.1]	PREDICTED: G-type lectin S-receptor-like serine/threonine-protein kinase At4g27290 [Daucus carota subsp. sativus]	G-type lectin S-receptor-like serine/threonine-protein kinase At4g27290 OS=Arabidopsis thaliana GN=At4g27290 PE=3 SV=4	Protein tyrosine kinase	[T] LSE0015 A Receptor-like protein kinase, contains lectin domains
CL1024.Contig21_All	K04733//interleukin-1 receptor-associated kinase 4 [EC:2.7.11.1]	PREDICTED: G-type lectin S-receptor-like serine/threonine-protein kinase At4g27290 [Daucus carota subsp. sativus]	G-type lectin S-receptor-like serine/threonine-protein kinase At1g11300 OS=Arabidopsis thaliana GN=At1g11300 PE=2 SV=1	Protein tyrosine kinase	[T] LSE0015 A Receptor-like protein kinase, contains lectin domains
CL1024.Contig22_All	K04733//interleukin-1 receptor-associated kinase 4 [EC:2.7.11.1]	PREDICTED: G-type lectin S-receptor-like serine/threonine-protein kinase At4g27290 [Daucus carota subsp. sativus]	G-type lectin S-receptor-like serine/threonine-protein kinase At4g27290 OS=Arabidopsis thaliana GN=At4g27290 PE=3 SV=4	D-mannose binding lectin	[T] LSE0015 A Receptor-like protein kinase, contains lectin domains
CL1024.Contig2_All	K04733//interleukin-1 receptor-associated kinase 4 [EC:2.7.11.1]	PREDICTED: G-type lectin S-receptor-like serine/threonine-protein kinase At4g27290 [Daucus carota subsp. sativus]	G-type lectin S-receptor-like serine/threonine-protein kinase At4g27290 OS=Arabidopsis thaliana GN=At4g27290 PE=3 SV=4	Protein tyrosine kinase	[T] LSE0015 A Receptor-like protein kinase, contains lectin domains
CL1024.Contig3_All	K04733//interleukin-1 receptor-associated kinase 4 [EC:2.7.11.1]	PREDICTED: G-type lectin S-receptor-like serine/threonine-protein kinase At4g27290 [Daucus carota subsp. sativus]	G-type lectin S-receptor-like serine/threonine-protein kinase At4g27290 OS=Arabidopsis thaliana GN=At4g27290 PE=3 SV=4	S-locus glycoprotein domain	[T] LSE0015 A Receptor-like protein kinase, contains lectin domains
CL1024.Contig4_All	K04733//interleukin-1 receptor-associated kinase 4 [EC:2.7.11.1]	PREDICTED: G-type lectin S-receptor-like serine/threonine-protein kinase At4g27290 [Daucus carota subsp. sativus]	G-type lectin S-receptor-like serine/threonine-protein kinase At4g27290 OS=Arabidopsis thaliana GN=At4g27290 PE=3 SV=4	Protein tyrosine kinase	[T] LSE0015 A Receptor-like protein kinase, contains lectin domains
CL1024.Contig5_All	K04733//interleukin-1 receptor-associated kinase 4 [EC:2.7.11.1]	PREDICTED: G-type lectin S-receptor-like serine/threonine-protein kinase At4g27290 [Daucus carota subsp. sativus]	G-type lectin S-receptor-like serine/threonine-protein kinase At4g27290 OS=Arabidopsis thaliana GN=At4g27290 PE=3 SV=4	Protein tyrosine kinase	[T] LSE0015 A Receptor-like protein kinase, contains lectin domains
CL1024.Contig6_All	K04733//interleukin-1 receptor-associated kinase 4 [EC:2.7.11.1]	PREDICTED: G-type lectin S-receptor-like serine/threonine-protein kinase At4g27290 [Daucus carota subsp. sativus]	G-type lectin S-receptor-like serine/threonine-protein kinase At4g27290 OS=Arabidopsis thaliana GN=At4g27290 PE=3 SV=4	Protein tyrosine kinase	[T] LSE0015 A Receptor-like protein kinase, contains lectin domains
CL1024.Contig7_All	K04733//interleukin-1 receptor-associated kinase 4 [EC:2.7.11.1]	PREDICTED: G-type lectin S-receptor-like serine/threonine-protein kinase At4g27290 [Daucus carota subsp. sativus]	Receptor-like serine/threonine-protein kinase SD1-6 OS=Arabidopsis thaliana GN=SD16 PE=1 SV=2	Protein tyrosine kinase	[T] LSE0015 A Receptor-like protein kinase, contains lectin domains
CL1024.Contig8_All	K04733//interleukin-1 receptor-associated kinase 4 [EC:2.7.11.1]	PREDICTED: G-type lectin S-receptor-like serine/threonine-protein kinase At4g27290 [Daucus carota subsp. sativus]	Receptor-like serine/threonine-protein kinase SD1-6 OS=Arabidopsis thaliana GN=SD16 PE=1 SV=2	Protein tyrosine kinase	[T] LSE0015 A Receptor-like protein kinase, contains lectin domains
CL1024.Contig9_All	K04733//interleukin-1 receptor-associated kinase 4 [EC:2.7.11.1]	PREDICTED: G-type lectin S-receptor-like serine/threonine-protein kinase At4g27290 [Daucus carota subsp. sativus]	G-type lectin S-receptor-like serine/threonine-protein kinase At4g27290 OS=Arabidopsis thaliana GN=At4g27290 PE=3 SV=4	Protein tyrosine kinase	[T] LSE0015 A Receptor-like protein kinase, contains lectin domains
CL10240.Contig1_All	K08150//MFS transporter, SP family, solute carrier family 2 (myo-inositol transporter), member 13	PREDICTED: monosaccharide-sensing protein 2-like [Daucus carota subsp. sativus] >KZM98700.1 hypothetical protein DCAR_013938 [Daucus carota subsp. sativus]	Monosaccharide-sensing protein 2 OS=Arabidopsis thaliana GN=MSSP2 PE=1 SV=2	Sugar (and other) transporter	[R] KOG0254 Predicted transporter (major facilitator superfamily)
CL10240.Contig2_All	K08150//MFS transporter, SP family, solute carrier family 2 (myo-inositol transporter), member 13	PREDICTED: monosaccharide-sensing protein 2 [Daucus carota subsp. sativus]	Monosaccharide-sensing protein 2 OS=Arabidopsis thaliana GN=MSSP2 PE=1 SV=2	Sugar (and other) transporter	[R] KOG0254 Predicted transporter (major facilitator superfamily)
CL10240.Contig3_All	K08150//MFS transporter, SP family, solute carrier family 2 (myo-inositol transporter), member 13	PREDICTED: monosaccharide-sensing protein 2-like [Daucus carota subsp. sativus] >KZM98700.1 hypothetical protein DCAR_013938 [Daucus carota subsp. sativus]	Monosaccharide-sensing protein 2 OS=Arabidopsis thaliana GN=MSSP2 PE=1 SV=2	Sugar (and other) transporter	[R] KOG0254 Predicted transporter (major facilitator superfamily)
CL10242.Contig1_All	K00815//tyrosine aminotransferase [EC:2.6.1.5]+ko00130//Ubiquinone and other terpenoid-quinone biosynthesis+ko01230//Biosynthesis of amino acids+ko00960//Tropane, piperidine and pyridine alkaloid biosynthesis+ko00350//Tyrosine metabolism+ko01100//Metabolic pathways+ko00950//Isoquinoline alkaloid biosynthesis+ko01110//Biosynthesis of secondary metabolites+ko00270//Cysteine and methionine metabolis…	probable aminotransferase TAT2 [Sesamum indicum]	Probable aminotransferase TAT2 OS=Arabidopsis thaliana GN=At5g53970 PE=2 SV=1	Aminotransferase class I and II	[E] KOG0259 Tyrosine aminotransferase
CL10242.Contig2_All	K00815//tyrosine aminotransferase [EC:2.6.1.5]+ko00130//Ubiquinone and other terpenoid-quinone biosynthesis+ko01230//Biosynthesis of amino acids+ko00960//Tropane, piperidine and pyridine alkaloid biosynthesis+ko00350//Tyrosine metabolism+ko01100//Metabolic pathways+ko00950//Isoquinoline alkaloid biosynthesis+ko01110//Biosynthesis of secondary metabolites+ko00270//Cysteine and methionine metabolis…	probable aminotransferase [Olea europaea]	Probable aminotransferase TAT2 OS=Arabidopsis thaliana GN=At5g53970 PE=2 SV=1	Aminotransferase class I and II	[E] KOG0259 Tyrosine aminotransferase
CL10242.Contig3_All	K00815//tyrosine aminotransferase [EC:2.6.1.5]+ko00130//Ubiquinone and other terpenoid-quinone biosynthesis+ko01230//Biosynthesis of amino acids+ko00960//Tropane, piperidine and pyridine alkaloid biosynthesis+ko00350//Tyrosine metabolism+ko01100//Metabolic pathways+ko00950//Isoquinoline alkaloid biosynthesis+ko01110//Biosynthesis of secondary metabolites+ko00270//Cysteine and methionine metabolis…	PREDICTED: probable aminotransferase TAT2 [Daucus carota subsp. sativus] >KZN07918.1 hypothetical protein DCAR_000587 [Daucus carota subsp. sativus]	Probable aminotransferase TAT2 OS=Arabidopsis thaliana GN=At5g53970 PE=2 SV=1	Aminotransferase class I and II	[E] KOG0259 Tyrosine aminotransferase
CL10242.Contig4_All	K00815//tyrosine aminotransferase [EC:2.6.1.5]+ko00130//Ubiquinone and other terpenoid-quinone biosynthesis+ko01230//Biosynthesis of amino acids+ko00960//Tropane, piperidine and pyridine alkaloid biosynthesis+ko00350//Tyrosine metabolism+ko01100//Metabolic pathways+ko00950//Isoquinoline alkaloid biosynthesis+ko01110//Biosynthesis of secondary metabolites+ko00270//Cysteine and methionine metabolis…	PREDICTED: probable aminotransferase TAT2 [Daucus carota subsp. sativus] >KZN07918.1 hypothetical protein DCAR_000587 [Daucus carota subsp. sativus]	Probable aminotransferase TAT2 OS=Arabidopsis thaliana GN=At5g53970 PE=2 SV=1	Aminotransferase class I and II	[E] KOG0259 Tyrosine aminotransferase
CL10242.Contig5_All	K00815//tyrosine aminotransferase [EC:2.6.1.5]+ko00130//Ubiquinone and other terpenoid-quinone biosynthesis+ko01230//Biosynthesis of amino acids+ko00960//Tropane, piperidine and pyridine alkaloid biosynthesis+ko00350//Tyrosine metabolism+ko01100//Metabolic pathways+ko00950//Isoquinoline alkaloid biosynthesis+ko01110//Biosynthesis of secondary metabolites+ko00270//Cysteine and methionine metabolis…	PREDICTED: probable aminotransferase TAT2 [Daucus carota subsp. sativus] >KZN07918.1 hypothetical protein DCAR_000587 [Daucus carota subsp. sativus]	Probable aminotransferase TAT2 OS=Arabidopsis thaliana GN=At5g53970 PE=2 SV=1	Aminotransferase class I and II	[E] KOG0259 Tyrosine aminotransferase
CL10242.Contig6_All	K00815//tyrosine aminotransferase [EC:2.6.1.5]+ko00130//Ubiquinone and other terpenoid-quinone biosynthesis+ko01230//Biosynthesis of amino acids+ko00960//Tropane, piperidine and pyridine alkaloid biosynthesis+ko00350//Tyrosine metabolism+ko01100//Metabolic pathways+ko00950//Isoquinoline alkaloid biosynthesis+ko01110//Biosynthesis of secondary metabolites+ko00270//Cysteine and methionine metabolis…	probable aminotransferase TAT2 [Sesamum indicum]	Nicotianamine aminotransferase B OS=Hordeum vulgare GN=naat-B PE=1 SV=2	Aminotransferase class I and II	[E] KOG0259 Tyrosine aminotransferase
CL10243.Contig1_All	K04733//interleukin-1 receptor-associated kinase 4 [EC:2.7.11.1]	PREDICTED: probable receptor-like protein kinase At5g47070 isoform X1 [Daucus carota subsp. sativus] >XP_017253481.1 PREDICTED: probable receptor-like protein kinase At5g47070 isoform X2 [Daucus carota subsp. sativus] >XP_017253482.1 PREDICTED: probable receptor-like protein kinase At5g47070 isoform X1 [Daucus carota subsp. sativus] >XP_017253483.1 PREDICTED: probable receptor-like protein kinase…	Probable serine/threonine-protein kinase PBL8 OS=Arabidopsis thaliana GN=PBL8 PE=1 SV=1	Protein tyrosine kinase	[T] KOG1187 Serine/threonine protein kinase
CL10243.Contig2_All	K04733//interleukin-1 receptor-associated kinase 4 [EC:2.7.11.1]	PREDICTED: probable receptor-like protein kinase At5g47070 isoform X1 [Daucus carota subsp. sativus] >XP_017253481.1 PREDICTED: probable receptor-like protein kinase At5g47070 isoform X2 [Daucus carota subsp. sativus] >XP_017253482.1 PREDICTED: probable receptor-like protein kinase At5g47070 isoform X1 [Daucus carota subsp. sativus] >XP_017253483.1 PREDICTED: probable receptor-like protein kinase…	Probable serine/threonine-protein kinase PBL8 OS=Arabidopsis thaliana GN=PBL8 PE=1 SV=1	Protein tyrosine kinase	[T] KOG1187 Serine/threonine protein kinase
CL10243.Contig3_All	K04733//interleukin-1 receptor-associated kinase 4 [EC:2.7.11.1]	PREDICTED: probable receptor-like protein kinase At5g47070 isoform X1 [Daucus carota subsp. sativus] >XP_017253481.1 PREDICTED: probable receptor-like protein kinase At5g47070 isoform X2 [Daucus carota subsp. sativus] >XP_017253482.1 PREDICTED: probable receptor-like protein kinase At5g47070 isoform X1 [Daucus carota subsp. sativus] >XP_017253483.1 PREDICTED: probable receptor-like protein kinase…	Receptor-like serine/threonine-protein kinase At3g01300 OS=Arabidopsis thaliana GN=At3g01300 PE=2 SV=1	Protein kinase domain	[T] KOG1187 Serine/threonine protein kinase
CL10243.Contig4_All	K04733//interleukin-1 receptor-associated kinase 4 [EC:2.7.11.1]	PREDICTED: probable receptor-like protein kinase At5g47070 isoform X1 [Daucus carota subsp. sativus] >XP_017253481.1 PREDICTED: probable receptor-like protein kinase At5g47070 isoform X2 [Daucus carota subsp. sativus] >XP_017253482.1 PREDICTED: probable receptor-like protein kinase At5g47070 isoform X1 [Daucus carota subsp. sativus] >XP_017253483.1 PREDICTED: probable receptor-like protein kinase…	Receptor-like serine/threonine-protein kinase At3g01300 OS=Arabidopsis thaliana GN=At3g01300 PE=2 SV=1	Protein kinase domain	[T] KOG1187 Serine/threonine protein kinase
CL10244.Contig1_All		PREDICTED: uncharacterized protein LOC108208108 [Daucus carota subsp. sativus]		Probable lipid transfer
CL10244.Contig2_All		PREDICTED: uncharacterized protein LOC108208108 [Daucus carota subsp. sativus]		Probable lipid transfer
CL10246.Contig1_All	K04628//ceramide galactosyltransferase [EC:2.4.1.47]+ko00600//Sphingolipid metabolism+ko01100//Metabolic pathways+ko00565//Ether lipid metabolism;K21374//7-deoxyloganetin glucosyltransferase [EC:2.4.1.324]	PREDICTED: UDP-glycosyltransferase 83A1 [Vitis vinifera]	UDP-glycosyltransferase 83A1 OS=Arabidopsis thaliana GN=UGT83A1 PE=2 SV=1	Diacylglycerol kinase catalytic domain	[GC] KOG1192 UDP-glucuronosyl and UDP-glucosyl transferase
CL10246.Contig2_All	K04628//ceramide galactosyltransferase [EC:2.4.1.47]+ko00600//Sphingolipid metabolism+ko01100//Metabolic pathways+ko00565//Ether lipid metabolism;K21374//7-deoxyloganetin glucosyltransferase [EC:2.4.1.324]	PREDICTED: UDP-glycosyltransferase 83A1-like [Daucus carota subsp. sativus]	UDP-glycosyltransferase 83A1 OS=Arabidopsis thaliana GN=UGT83A1 PE=2 SV=1	UDP-glucoronosyl and UDP-glucosyl transferase	[GC] KOG1192 UDP-glucuronosyl and UDP-glucosyl transferase
CL10248.Contig1_All	K01653//acetolactate synthase I/III small subunit [EC:2.2.1.6]+ko00290//Valine, leucine and isoleucine biosynthesis+ko00770//Pantothenate and CoA biosynthesis+ko01230//Biosynthesis of amino acids+ko01100//Metabolic pathways+ko00650//Butanoate metabolism+ko01110//Biosynthesis of secondary metabolites+ko01210//2-Oxocarboxylic acid metabolism+ko00660//C5-Branched dibasic acid metabolism	PREDICTED: acetolactate synthase small subunit 1, chloroplastic-like [Daucus carota subsp. sativus] >KZN04666.1 hypothetical protein DCAR_005503 [Daucus carota subsp. sativus]	Acetolactate synthase small subunit 1, chloroplastic OS=Arabidopsis thaliana GN=VAT1 PE=1 SV=1	Small subunit of acetolactate synthase	[E] KOG2663 Acetolactate synthase, small subunit
CL10248.Contig2_All	K01653//acetolactate synthase I/III small subunit [EC:2.2.1.6]+ko00290//Valine, leucine and isoleucine biosynthesis+ko00770//Pantothenate and CoA biosynthesis+ko01230//Biosynthesis of amino acids+ko01100//Metabolic pathways+ko00650//Butanoate metabolism+ko01110//Biosynthesis of secondary metabolites+ko01210//2-Oxocarboxylic acid metabolism+ko00660//C5-Branched dibasic acid metabolism	PREDICTED: acetolactate synthase small subunit 1, chloroplastic-like [Daucus carota subsp. sativus] >KZN04666.1 hypothetical protein DCAR_005503 [Daucus carota subsp. sativus]	Acetolactate synthase small subunit 1, chloroplastic OS=Arabidopsis thaliana GN=VAT1 PE=1 SV=1	Small subunit of acetolactate synthase	[E] KOG2663 Acetolactate synthase, small subunit
CL1025.Contig1_All	K00799//glutathione S-transferase [EC:2.5.1.18]+ko00480//Glutathione metabolism	uncharacterized protein LOC110796798 [Spinacia oleracea]
CL1025.Contig2_All	K00799//glutathione S-transferase [EC:2.5.1.18]+ko00480//Glutathione metabolism	uncharacterized protein LOC110796798 [Spinacia oleracea]
CL10251.Contig1_All		PREDICTED: F-box protein PP2-A12 [Daucus carota subsp. sativus] >KZN07921.1 hypothetical protein DCAR_000590 [Daucus carota subsp. sativus]	F-box protein PP2-A12 OS=Arabidopsis thaliana GN=P2A12 PE=2 SV=1	Phloem protein 2	[W] LSE0494 A Phloem lectin
CL10251.Contig2_All		PREDICTED: F-box protein PP2-A12 [Daucus carota subsp. sativus] >KZN07921.1 hypothetical protein DCAR_000590 [Daucus carota subsp. sativus]	F-box protein PP2-A12 OS=Arabidopsis thaliana GN=P2A12 PE=2 SV=1		[W] LSE0494 A Phloem lectin
CL10251.Contig3_All	K04733//interleukin-1 receptor-associated kinase 4 [EC:2.7.11.1]	PREDICTED: F-box protein PP2-A12 [Daucus carota subsp. sativus] >KZN07921.1 hypothetical protein DCAR_000590 [Daucus carota subsp. sativus]	F-box protein PP2-A12 OS=Arabidopsis thaliana GN=P2A12 PE=2 SV=1	Phloem protein 2	[W] LSE0494 A Phloem lectin
CL10252.Contig1_All		hypothetical protein DCAR_018084 [Daucus carota subsp. sativus]
CL10252.Contig2_All		PREDICTED: F-box protein At5g07610-like [Daucus carota subsp. sativus] >KZM94843.1 hypothetical protein DCAR_018085 [Daucus carota subsp. sativus]	F-box protein At5g07610 OS=Arabidopsis thaliana GN=At5g07610 PE=2 SV=1	NgoBV restriction endonuclease	[R] LSE0005 A F-box domain
CL10253.Contig1_All	K03006//DNA-directed RNA polymerase II subunit RPB1 [EC:2.7.7.6]+ko00230//Purine metabolism+ko03020//RNA polymerase+ko01100//Metabolic pathways+ko00240//Pyrimidine metabolism;K04733//interleukin-1 receptor-associated kinase 4 [EC:2.7.11.1]	PREDICTED: inactive poly [ADP-ribose] polymerase RCD1-like isoform X1 [Daucus carota subsp. sativus] >XP_017258011.1 PREDICTED: inactive poly [ADP-ribose] polymerase RCD1-like isoform X1 [Daucus carota subsp. sativus] >XP_017258012.1 PREDICTED: inactive poly [ADP-ribose] polymerase RCD1-like isoform X1 [Daucus carota subsp. sativus]	Formin-like protein 20 OS=Arabidopsis thaliana GN=FH20 PE=2 SV=3	RCD1-SRO-TAF4 (RST) plant domain	[ZR] LSE0118 A Protein possibly involved in cytoskeleton rearrangements, contains FH domain
CL10253.Contig2_All	K03006//DNA-directed RNA polymerase II subunit RPB1 [EC:2.7.7.6]+ko00230//Purine metabolism+ko03020//RNA polymerase+ko01100//Metabolic pathways+ko00240//Pyrimidine metabolism;K04733//interleukin-1 receptor-associated kinase 4 [EC:2.7.11.1]	PREDICTED: inactive poly [ADP-ribose] polymerase RCD1-like isoform X1 [Daucus carota subsp. sativus] >XP_017258011.1 PREDICTED: inactive poly [ADP-ribose] polymerase RCD1-like isoform X1 [Daucus carota subsp. sativus] >XP_017258012.1 PREDICTED: inactive poly [ADP-ribose] polymerase RCD1-like isoform X1 [Daucus carota subsp. sativus]	Probable inactive poly [ADP-ribose] polymerase SRO2 OS=Arabidopsis thaliana GN=SRO2 PE=1 SV=1	RCD1-SRO-TAF4 (RST) plant domain	[ZR] LSE0118 A Protein possibly involved in cytoskeleton rearrangements, contains FH domain
CL10253.Contig3_All	K03006//DNA-directed RNA polymerase II subunit RPB1 [EC:2.7.7.6]+ko00230//Purine metabolism+ko03020//RNA polymerase+ko01100//Metabolic pathways+ko00240//Pyrimidine metabolism;K04733//interleukin-1 receptor-associated kinase 4 [EC:2.7.11.1]	PREDICTED: inactive poly [ADP-ribose] polymerase RCD1-like isoform X1 [Daucus carota subsp. sativus] >XP_017258011.1 PREDICTED: inactive poly [ADP-ribose] polymerase RCD1-like isoform X1 [Daucus carota subsp. sativus] >XP_017258012.1 PREDICTED: inactive poly [ADP-ribose] polymerase RCD1-like isoform X1 [Daucus carota subsp. sativus]	Formin-like protein 20 OS=Arabidopsis thaliana GN=FH20 PE=2 SV=3	Poly(ADP-ribose) polymerase catalytic domain	[ZR] LSE0118 A Protein possibly involved in cytoskeleton rearrangements, contains FH domain
CL10253.Contig4_All	K03006//DNA-directed RNA polymerase II subunit RPB1 [EC:2.7.7.6]+ko00230//Purine metabolism+ko03020//RNA polymerase+ko01100//Metabolic pathways+ko00240//Pyrimidine metabolism;K04733//interleukin-1 receptor-associated kinase 4 [EC:2.7.11.1]	PREDICTED: inactive poly [ADP-ribose] polymerase RCD1-like isoform X1 [Daucus carota subsp. sativus] >XP_017258011.1 PREDICTED: inactive poly [ADP-ribose] polymerase RCD1-like isoform X1 [Daucus carota subsp. sativus] >XP_017258012.1 PREDICTED: inactive poly [ADP-ribose] polymerase RCD1-like isoform X1 [Daucus carota subsp. sativus]	Probable inactive poly [ADP-ribose] polymerase SRO2 OS=Arabidopsis thaliana GN=SRO2 PE=1 SV=1	Poly(ADP-ribose) polymerase catalytic domain	[ZR] LSE0118 A Protein possibly involved in cytoskeleton rearrangements, contains FH domain
CL10254.Contig2_All		PREDICTED: uncharacterized protein LOC108223499 [Daucus carota subsp. sativus] >XP_017253288.1 PREDICTED: uncharacterized protein LOC108223499 [Daucus carota subsp. sativus] >KZM95187.1 hypothetical protein DCAR_018429 [Daucus carota subsp. sativus]		Proline-rich nuclear receptor coactivator
CL10255.Contig1_All	K22390//acid phosphatase type 7	putative inactive purple acid phosphatase 27, partial [Nicotiana attenuata]	Probable inactive purple acid phosphatase 27 OS=Arabidopsis thaliana GN=PAP27 PE=2 SV=1	Calcineurin-like phosphoesterase	[G] KOG1378 Purple acid phosphatase
CL10255.Contig2_All	K22390//acid phosphatase type 7	putative inactive purple acid phosphatase 27-like [Dorcoceras hygrometricum]	Probable inactive purple acid phosphatase 27 OS=Arabidopsis thaliana GN=PAP27 PE=2 SV=1	Iron/zinc purple acid phosphatase-like protein C	[G] KOG1378 Purple acid phosphatase
CL10255.Contig3_All	K22390//acid phosphatase type 7	PREDICTED: probable inactive purple acid phosphatase 27 [Daucus carota subsp. sativus] >XP_017253827.1 PREDICTED: probable inactive purple acid phosphatase 27 [Daucus carota subsp. sativus] >KZM93147.1 hypothetical protein DCAR_016392 [Daucus carota subsp. sativus] >KZM93148.1 hypothetical protein DCAR_016393 [Daucus carota subsp. sativus]	Probable inactive purple acid phosphatase 27 OS=Arabidopsis thaliana GN=PAP27 PE=2 SV=1	Purple acid Phosphatase, N-terminal domain	[G] KOG1378 Purple acid phosphatase
CL10256.Contig1_All	K16055//trehalose 6-phosphate synthase/phosphatase [EC:2.4.1.15 3.1.3.12]+ko01100//Metabolic pathways+ko00500//Starch and sucrose metabolism	hypothetical protein DCAR_007921 [Daucus carota subsp. sativus]	Alpha,alpha-trehalose-phosphate synthase [UDP-forming] 1 OS=Arabidopsis thaliana GN=TPS1 PE=1 SV=1		[G] KOG1050 Trehalose-6-phosphate synthase component TPS1 and related subunits
CL10256.Contig2_All	K16055//trehalose 6-phosphate synthase/phosphatase [EC:2.4.1.15 3.1.3.12]+ko01100//Metabolic pathways+ko00500//Starch and sucrose metabolism	PREDICTED: alpha,alpha-trehalose-phosphate synthase [UDP-forming] 1-like [Daucus carota subsp. sativus]	Alpha,alpha-trehalose-phosphate synthase [UDP-forming] 1 OS=Arabidopsis thaliana GN=TPS1 PE=1 SV=1	Trehalose-phosphatase	[G] KOG1050 Trehalose-6-phosphate synthase component TPS1 and related subunits
CL10256.Contig3_All	K16055//trehalose 6-phosphate synthase/phosphatase [EC:2.4.1.15 3.1.3.12]+ko01100//Metabolic pathways+ko00500//Starch and sucrose metabolism	alpha,alpha-trehalose-phosphate synthase [UDP-forming] 1-like isoform X2 [Hevea brasiliensis] >XP_021653346.1 alpha,alpha-trehalose-phosphate synthase [UDP-forming] 1-like isoform X2 [Hevea brasiliensis]	Alpha,alpha-trehalose-phosphate synthase [UDP-forming] 1 OS=Arabidopsis thaliana GN=TPS1 PE=1 SV=1		[G] KOG1050 Trehalose-6-phosphate synthase component TPS1 and related subunits
CL10257.Contig1_All		PREDICTED: uncharacterized protein LOC108210920 [Daucus carota subsp. sativus]		mTERF
CL10257.Contig2_All		PREDICTED: uncharacterized protein LOC108210920 [Daucus carota subsp. sativus]		mTERF
CL10259.Contig1_All	K02973//small subunit ribosomal protein S23e+ko03010//Ribosome	predicted protein [Hordeum vulgare subsp. vulgare]	40S ribosomal protein S23 OS=Fragaria ananassa GN=RPS23 PE=2 SV=1	Ribosomal protein S12/S23	[J] KOG1749 40S ribosomal protein S23
CL10259.Contig2_All	K02973//small subunit ribosomal protein S23e+ko03010//Ribosome	predicted protein [Hordeum vulgare subsp. vulgare]	40S ribosomal protein S23 OS=Fragaria ananassa GN=RPS23 PE=2 SV=1	Ribosomal protein S12/S23	[J] KOG1749 40S ribosomal protein S23
CL1026.Contig1_All	K17890//autophagy-related protein 16-1+ko04136//Autophagy - other	PREDICTED: autophagy-related protein 16-like [Daucus carota subsp. sativus] >XP_017218743.1 PREDICTED: autophagy-related protein 16-like [Daucus carota subsp. sativus] >XP_017218744.1 PREDICTED: autophagy-related protein 16-like [Daucus carota subsp. sativus] >XP_017218745.1 PREDICTED: autophagy-related protein 16-like [Daucus carota subsp. sativus]	Autophagy-related protein 16 OS=Arabidopsis thaliana GN=ATG16 PE=2 SV=1	WD domain, G-beta repeat	[R] KOG0288 WD40 repeat protein TipD
CL1026.Contig2_All	K17890//autophagy-related protein 16-1+ko04136//Autophagy - other	hypothetical protein DCAR_007461 [Daucus carota subsp. sativus]	Autophagy-related protein 16 OS=Arabidopsis thaliana GN=ATG16 PE=2 SV=1		[R] KOG0288 WD40 repeat protein TipD
CL1026.Contig3_All	K17890//autophagy-related protein 16-1+ko04136//Autophagy - other	PREDICTED: autophagy-related protein 16-like [Daucus carota subsp. sativus] >XP_017218743.1 PREDICTED: autophagy-related protein 16-like [Daucus carota subsp. sativus] >XP_017218744.1 PREDICTED: autophagy-related protein 16-like [Daucus carota subsp. sativus] >XP_017218745.1 PREDICTED: autophagy-related protein 16-like [Daucus carota subsp. sativus]	Autophagy-related protein 16 OS=Arabidopsis thaliana GN=ATG16 PE=2 SV=1	WD domain, G-beta repeat	[R] KOG0288 WD40 repeat protein TipD
CL1026.Contig4_All	K17890//autophagy-related protein 16-1+ko04136//Autophagy - other	hypothetical protein DCAR_007461 [Daucus carota subsp. sativus]	Autophagy-related protein 16 OS=Arabidopsis thaliana GN=ATG16 PE=2 SV=1	WD domain, G-beta repeat	[R] KOG0288 WD40 repeat protein TipD
CL1026.Contig5_All	K17890//autophagy-related protein 16-1+ko04136//Autophagy - other	PREDICTED: autophagy-related protein 16-like [Daucus carota subsp. sativus] >XP_017236113.1 PREDICTED: autophagy-related protein 16-like [Daucus carota subsp. sativus]	Autophagy-related protein 16 OS=Arabidopsis thaliana GN=ATG16 PE=2 SV=1	WD domain, G-beta repeat	[R] KOG0288 WD40 repeat protein TipD
CL1026.Contig6_All	K17890//autophagy-related protein 16-1+ko04136//Autophagy - other	hypothetical protein DCAR_026196 [Daucus carota subsp. sativus]	Autophagy-related protein 16 OS=Arabidopsis thaliana GN=ATG16 PE=2 SV=1		[R] KOG0288 WD40 repeat protein TipD
CL1026.Contig7_All	K17890//autophagy-related protein 16-1+ko04136//Autophagy - other	PREDICTED: autophagy-related protein 16-like [Daucus carota subsp. sativus] >XP_017236113.1 PREDICTED: autophagy-related protein 16-like [Daucus carota subsp. sativus]	Autophagy-related protein 16 OS=Arabidopsis thaliana GN=ATG16 PE=2 SV=1	WD domain, G-beta repeat	[R] KOG0288 WD40 repeat protein TipD
CL1026.Contig8_All		putative root cap [Helianthus annuus]
CL10260.Contig1_All	K20168//TBC1 domain family member 15	PREDICTED: TBC1 domain family member 15-like isoform X2 [Daucus carota subsp. sativus]			[T] KOG2197 Ypt/Rab-specific GTPase-activating protein GYP7 and related proteins
CL10260.Contig2_All	K20168//TBC1 domain family member 15	PREDICTED: TBC1 domain family member 15-like isoform X2 [Daucus carota subsp. sativus]		Rab-GTPase-TBC domain	[T] KOG2197 Ypt/Rab-specific GTPase-activating protein GYP7 and related proteins
CL10260.Contig3_All	K20168//TBC1 domain family member 15	hypothetical protein DCAR_000922 [Daucus carota subsp. sativus]		Rab-GTPase-TBC domain	[T] KOG2197 Ypt/Rab-specific GTPase-activating protein GYP7 and related proteins
CL10260.Contig4_All	K20168//TBC1 domain family member 15	PREDICTED: TBC1 domain family member 15-like isoform X1 [Daucus carota subsp. sativus]		Rab-GTPase-TBC domain	[T] KOG2197 Ypt/Rab-specific GTPase-activating protein GYP7 and related proteins
CL10260.Contig5_All	K20168//TBC1 domain family member 15	hypothetical protein DCAR_000922 [Daucus carota subsp. sativus]		Rab-GTPase-TBC domain	[T] KOG2197 Ypt/Rab-specific GTPase-activating protein GYP7 and related proteins
CL10260.Contig6_All	K20168//TBC1 domain family member 15	PREDICTED: TBC1 domain family member 15-like isoform X1 [Daucus carota subsp. sativus]		Rab-GTPase-TBC domain	[T] KOG2197 Ypt/Rab-specific GTPase-activating protein GYP7 and related proteins
CL10260.Contig7_All	K20168//TBC1 domain family member 15	PREDICTED: TBC1 domain family member 15-like isoform X1 [Daucus carota subsp. sativus]		Rab-GTPase-TBC domain	[T] KOG2197 Ypt/Rab-specific GTPase-activating protein GYP7 and related proteins
CL10261.Contig1_All	K17262//tubulin-specific chaperone B;K04485//DNA repair protein RadA/Sms;K10798//poly [ADP-ribose] polymerase [EC:2.4.2.30]+ko03410//Base excision repair	PREDICTED: uncharacterized protein LOC108217052 [Daucus carota subsp. sativus]		Retrotransposon gag protein	[R] KOG0017 FOG: Transposon-encoded proteins with TYA, reverse transcriptase, integrase domains in various combinations
CL10261.Contig2_All		PREDICTED: uncharacterized protein LOC108217052 [Daucus carota subsp. sativus]
CL10263.Contig1_All	K15168//mediator of RNA polymerase II transcription subunit 25	PREDICTED: RNA polymerase II degradation factor 1-like isoform X2 [Daucus carota subsp. sativus]	Alpha/beta-gliadin A-V OS=Triticum aestivum PE=2 SV=1	GAT domain	[PT] KOG3599 Ca2+-modulated nonselective cation channel polycystin
CL10263.Contig2_All	K13141//integrator complex subunit 4;K15168//mediator of RNA polymerase II transcription subunit 25	PREDICTED: vacuolar protein sorting-associated protein 27-like isoform X1 [Daucus carota subsp. sativus] >KZM95416.1 hypothetical protein DCAR_018658 [Daucus carota subsp. sativus]	TOM1-like protein 6 OS=Arabidopsis thaliana GN=TOL6 PE=1 SV=1	VHS domain	[U] KOG1087 Cytosolic sorting protein GGA2/TOM1
CL10263.Contig3_All	K13141//integrator complex subunit 4;K15168//mediator of RNA polymerase II transcription subunit 25	PREDICTED: vacuolar protein sorting-associated protein 27-like isoform X1 [Daucus carota subsp. sativus] >KZM95416.1 hypothetical protein DCAR_018658 [Daucus carota subsp. sativus]	TOM1-like protein 6 OS=Arabidopsis thaliana GN=TOL6 PE=1 SV=1	VHS domain	[PT] KOG3599 Ca2+-modulated nonselective cation channel polycystin
CL10263.Contig4_All	K15168//mediator of RNA polymerase II transcription subunit 25;K03126//transcription initiation factor TFIID subunit 12+ko03022//Basal transcription factors	PREDICTED: RNA polymerase II degradation factor 1-like isoform X2 [Daucus carota subsp. sativus]	Alpha/beta-gliadin A-IV OS=Triticum aestivum PE=2 SV=1		[PT] KOG3599 Ca2+-modulated nonselective cation channel polycystin
CL10263.Contig5_All	K15168//mediator of RNA polymerase II transcription subunit 25	PREDICTED: RNA polymerase II degradation factor 1-like isoform X2 [Daucus carota subsp. sativus]	Alpha/beta-gliadin A-V OS=Triticum aestivum PE=2 SV=1	Adenovirus E1B protein N-terminus	[PT] KOG3599 Ca2+-modulated nonselective cation channel polycystin
CL10264.Contig2_All		hypothetical protein DCAR_005306 [Daucus carota subsp. sativus]
CL10265.Contig1_All	K01876//aspartyl-tRNA synthetase [EC:6.1.1.12]+ko00970//Aminoacyl-tRNA biosynthesis	PREDICTED: aspartate--tRNA ligase, chloroplastic/mitochondrial [Daucus carota subsp. sativus]	Aspartate--tRNA ligase, chloroplastic/mitochondrial OS=Arabidopsis thaliana GN=At4g33760 PE=2 SV=1	tRNA synthetases class II (D, K and N)	[J] KOG2411 Aspartyl-tRNA synthetase, mitochondrial
CL10265.Contig2_All	K01876//aspartyl-tRNA synthetase [EC:6.1.1.12]+ko00970//Aminoacyl-tRNA biosynthesis	PREDICTED: aspartate--tRNA ligase, chloroplastic/mitochondrial [Daucus carota subsp. sativus]	Aspartate--tRNA ligase, chloroplastic/mitochondrial OS=Arabidopsis thaliana GN=At4g33760 PE=2 SV=1	tRNA synthetases class II (D, K and N)	[J] KOG2411 Aspartyl-tRNA synthetase, mitochondrial
CL10265.Contig3_All	K01876//aspartyl-tRNA synthetase [EC:6.1.1.12]+ko00970//Aminoacyl-tRNA biosynthesis	PREDICTED: aspartate--tRNA ligase, chloroplastic/mitochondrial [Daucus carota subsp. sativus]	Aspartate--tRNA ligase, chloroplastic/mitochondrial OS=Arabidopsis thaliana GN=At4g33760 PE=2 SV=1	tRNA synthetases class II (D, K and N)	[J] KOG2411 Aspartyl-tRNA synthetase, mitochondrial
CL10266.Contig1_All	K18823//soyasaponin III rhamnosyltransferase [EC:2.4.1.273]	PREDICTED: UDP-glycosyltransferase 91A1-like [Daucus carota subsp. sativus]	UDP-glycosyltransferase 91A1 OS=Arabidopsis thaliana GN=UGT91A1 PE=2 SV=1	UDP-glucoronosyl and UDP-glucosyl transferase	[GC] KOG1192 UDP-glucuronosyl and UDP-glucosyl transferase
CL10266.Contig2_All	K18823//soyasaponin III rhamnosyltransferase [EC:2.4.1.273]	PREDICTED: UDP-glycosyltransferase 91A1-like [Daucus carota subsp. sativus]	UDP-glycosyltransferase 91A1 OS=Arabidopsis thaliana GN=UGT91A1 PE=2 SV=1	UDP-glucoronosyl and UDP-glucosyl transferase	[GC] KOG1192 UDP-glucuronosyl and UDP-glucosyl transferase
CL10267.Contig1_All	K01092//myo-inositol-1(or 4)-monophosphatase [EC:3.1.3.25]+ko01100//Metabolic pathways+ko04070//Phosphatidylinositol signaling system+ko00562//Inositol phosphate metabolism	PREDICTED: protein CURVATURE THYLAKOID 1A, chloroplastic-like [Daucus carota subsp. sativus] >KZM88162.1 hypothetical protein DCAR_025237 [Daucus carota subsp. sativus]	Protein CURVATURE THYLAKOID 1A, chloroplastic OS=Arabidopsis thaliana GN=CURT1A PE=1 SV=1	CAAD domains of cyanobacterial aminoacyl-tRNA synthetase
CL10267.Contig2_All	K01092//myo-inositol-1(or 4)-monophosphatase [EC:3.1.3.25]+ko01100//Metabolic pathways+ko04070//Phosphatidylinositol signaling system+ko00562//Inositol phosphate metabolism	PREDICTED: protein CURVATURE THYLAKOID 1A, chloroplastic-like [Daucus carota subsp. sativus] >KZM88162.1 hypothetical protein DCAR_025237 [Daucus carota subsp. sativus]	Protein CURVATURE THYLAKOID 1A, chloroplastic OS=Arabidopsis thaliana GN=CURT1A PE=1 SV=1
CL10267.Contig3_All	K01092//myo-inositol-1(or 4)-monophosphatase [EC:3.1.3.25]+ko01100//Metabolic pathways+ko04070//Phosphatidylinositol signaling system+ko00562//Inositol phosphate metabolism	PREDICTED: protein CURVATURE THYLAKOID 1A, chloroplastic-like [Daucus carota subsp. sativus] >KZM88162.1 hypothetical protein DCAR_025237 [Daucus carota subsp. sativus]	Protein CURVATURE THYLAKOID 1A, chloroplastic OS=Arabidopsis thaliana GN=CURT1A PE=1 SV=1	CAAD domains of cyanobacterial aminoacyl-tRNA synthetase
CL10267.Contig4_All	K01092//myo-inositol-1(or 4)-monophosphatase [EC:3.1.3.25]+ko01100//Metabolic pathways+ko04070//Phosphatidylinositol signaling system+ko00562//Inositol phosphate metabolism	PREDICTED: protein CURVATURE THYLAKOID 1A, chloroplastic-like [Daucus carota subsp. sativus] >KZM88162.1 hypothetical protein DCAR_025237 [Daucus carota subsp. sativus]	Protein CURVATURE THYLAKOID 1A, chloroplastic OS=Arabidopsis thaliana GN=CURT1A PE=1 SV=1	CAAD domains of cyanobacterial aminoacyl-tRNA synthetase
CL10267.Contig5_All	K01092//myo-inositol-1(or 4)-monophosphatase [EC:3.1.3.25]+ko01100//Metabolic pathways+ko04070//Phosphatidylinositol signaling system+ko00562//Inositol phosphate metabolism	PREDICTED: protein CURVATURE THYLAKOID 1A, chloroplastic-like [Daucus carota subsp. sativus] >KZM88162.1 hypothetical protein DCAR_025237 [Daucus carota subsp. sativus]	Protein CURVATURE THYLAKOID 1A, chloroplastic OS=Arabidopsis thaliana GN=CURT1A PE=1 SV=1	CAAD domains of cyanobacterial aminoacyl-tRNA synthetase
CL10268.Contig1_All	K03283//heat shock 70kDa protein 1/2/6/8+ko03040//Spliceosome+ko04144//Endocytosis+ko04141//Protein processing in endoplasmic reticulum	PREDICTED: uncharacterized protein LOC108215866 [Daucus carota subsp. sativus]		Lecithin retinol acyltransferase
CL10268.Contig2_All	K03283//heat shock 70kDa protein 1/2/6/8+ko03040//Spliceosome+ko04144//Endocytosis+ko04141//Protein processing in endoplasmic reticulum	PREDICTED: uncharacterized protein LOC108215866 [Daucus carota subsp. sativus]
CL10268.Contig3_All	K03283//heat shock 70kDa protein 1/2/6/8+ko03040//Spliceosome+ko04144//Endocytosis+ko04141//Protein processing in endoplasmic reticulum	PREDICTED: uncharacterized protein LOC108215866 [Daucus carota subsp. sativus]
CL10269.Contig1_All		hypothetical protein DCAR_013380 [Daucus carota subsp. sativus]	Protein LITTLE ZIPPER 3 OS=Arabidopsis thaliana GN=ZPR3 PE=1 SV=1
CL10269.Contig2_All		hypothetical protein DCAR_013380 [Daucus carota subsp. sativus]	Protein LITTLE ZIPPER 3 OS=Arabidopsis thaliana GN=ZPR3 PE=1 SV=1	Deoxyribonuclease II
CL1027.Contig10_All	K08726//soluble epoxide hydrolase / lipid-phosphate phosphatase [EC:3.3.2.10 3.1.3.76]+ko04146//Peroxisome+ko00590//Arachidonic acid metabolism+ko01100//Metabolic pathways	epoxide hydrolase-like protein [Medicago truncatula] >KEH31110.1 epoxide hydrolase-like protein [Medicago truncatula]
CL1027.Contig11_All	K08726//soluble epoxide hydrolase / lipid-phosphate phosphatase [EC:3.3.2.10 3.1.3.76]+ko04146//Peroxisome+ko00590//Arachidonic acid metabolism+ko01100//Metabolic pathways;K15718//linoleate 9S-lipoxygenase [EC:1.13.11.58]+ko00591//Linoleic acid metabolism	PREDICTED: bifunctional epoxide hydrolase 2-like [Daucus carota subsp. sativus] >KZM84467.1 hypothetical protein DCAR_028111 [Daucus carota subsp. sativus]	Linoleate 9S-lipoxygenase 1 OS=Arabidopsis thaliana GN=LOX1 PE=1 SV=1		[I] TWOG0111 Lipoxygenase
CL1027.Contig12_All	K15718//linoleate 9S-lipoxygenase [EC:1.13.11.58]+ko00591//Linoleic acid metabolism	PREDICTED: probable linoleate 9S-lipoxygenase 5 isoform X1 [Daucus carota subsp. sativus] >XP_017223394.1 PREDICTED: probable linoleate 9S-lipoxygenase 5 isoform X2 [Daucus carota subsp. sativus]	Probable linoleate 9S-lipoxygenase 5 OS=Solanum tuberosum GN=LOX1.5 PE=2 SV=1	Lipoxygenase	[I] TWOG0111 Lipoxygenase
CL1027.Contig13_All	K10144//RING finger and CHY zinc finger domain-containing protein 1 [EC:2.3.2.27]+ko04120//Ubiquitin mediated proteolysis	PREDICTED: bifunctional epoxide hydrolase 2 [Citrus sinensis] >KDO75869.1 hypothetical protein CISIN_1g0212821mg [Citrus sinensis]
CL1027.Contig14_All	K13338//peroxin-1+ko04146//Peroxisome;K08726//soluble epoxide hydrolase / lipid-phosphate phosphatase [EC:3.3.2.10 3.1.3.76]+ko04146//Peroxisome+ko00590//Arachidonic acid metabolism+ko01100//Metabolic pathways	PREDICTED: bifunctional epoxide hydrolase 2-like [Daucus carota subsp. sativus] >KZM84467.1 hypothetical protein DCAR_028111 [Daucus carota subsp. sativus]	Calpain-type cysteine protease DEK1 OS=Arabidopsis thaliana GN=DEK1 PE=1 SV=1		[OT] KOG0045 Cytosolic Ca2+-dependent cysteine protease (calpain), large subunit (EF-Hand protein superfamily)
CL1027.Contig15_All	K06269//serine/threonine-protein phosphatase PP1 catalytic subunit [EC:3.1.3.16]+ko03015//mRNA surveillance pathway	PREDICTED: serine/threonine-protein phosphatase PP1 isoform X2 [Daucus carota subsp. sativus]	Serine/threonine-protein phosphatase PP1 isozyme 6 OS=Arabidopsis thaliana GN=TOPP6 PE=1 SV=2		[TR] KOG0374 Serine/threonine specific protein phosphatase PP1, catalytic subunit
CL1027.Contig16_All	K15718//linoleate 9S-lipoxygenase [EC:1.13.11.58]+ko00591//Linoleic acid metabolism	hypothetical protein DCAR_027194 [Daucus carota subsp. sativus]	Probable linoleate 9S-lipoxygenase 5 OS=Solanum tuberosum GN=LOX1.5 PE=2 SV=1	Lipoxygenase	[I] TWOG0111 Lipoxygenase
CL1027.Contig17_All	K06269//serine/threonine-protein phosphatase PP1 catalytic subunit [EC:3.1.3.16]+ko03015//mRNA surveillance pathway	PREDICTED: serine/threonine-protein phosphatase PP1 isoform X1 [Daucus carota subsp. sativus] >KZN07513.1 hypothetical protein DCAR_008350 [Daucus carota subsp. sativus]	Serine/threonine-protein phosphatase PP1 isozyme 6 OS=Arabidopsis thaliana GN=TOPP6 PE=1 SV=2		[TR] KOG0374 Serine/threonine specific protein phosphatase PP1, catalytic subunit
CL1027.Contig18_All	K10144//RING finger and CHY zinc finger domain-containing protein 1 [EC:2.3.2.27]+ko04120//Ubiquitin mediated proteolysis;K08726//soluble epoxide hydrolase / lipid-phosphate phosphatase [EC:3.3.2.10 3.1.3.76]+ko04146//Peroxisome+ko00590//Arachidonic acid metabolism+ko01100//Metabolic pathways;K15718//linoleate 9S-lipoxygenase [EC:1.13.11.58]+ko00591//Linoleic acid metabolism	PREDICTED: bifunctional epoxide hydrolase 2-like [Daucus carota subsp. sativus] >KZM84467.1 hypothetical protein DCAR_028111 [Daucus carota subsp. sativus]	Linoleate 9S-lipoxygenase 1 OS=Arabidopsis thaliana GN=LOX1 PE=1 SV=1		[I] KOG4178 Soluble epoxide hydrolase
CL1027.Contig19_All	K15718//linoleate 9S-lipoxygenase [EC:1.13.11.58]+ko00591//Linoleic acid metabolism	hypothetical protein DCAR_002390 [Daucus carota subsp. sativus]	Linoleate 9S-lipoxygenase 5, chloroplastic OS=Arabidopsis thaliana GN=LOX5 PE=2 SV=2	Lipoxygenase	[I] TWOG0111 Lipoxygenase
CL1027.Contig1_All	K10144//RING finger and CHY zinc finger domain-containing protein 1 [EC:2.3.2.27]+ko04120//Ubiquitin mediated proteolysis	PREDICTED: bifunctional epoxide hydrolase 2 [Citrus sinensis] >KDO75869.1 hypothetical protein CISIN_1g0212821mg [Citrus sinensis]
CL1027.Contig20_All	K06269//serine/threonine-protein phosphatase PP1 catalytic subunit [EC:3.1.3.16]+ko03015//mRNA surveillance pathway	PREDICTED: serine/threonine-protein phosphatase PP1 isoform X1 [Daucus carota subsp. sativus] >KZN07513.1 hypothetical protein DCAR_008350 [Daucus carota subsp. sativus]	Serine/threonine-protein phosphatase PP1 isozyme 6 OS=Arabidopsis thaliana GN=TOPP6 PE=1 SV=2		[TR] KOG0374 Serine/threonine specific protein phosphatase PP1, catalytic subunit
CL1027.Contig21_All	K13338//peroxin-1+ko04146//Peroxisome	PREDICTED: peroxisome biogenesis protein 1 isoform X1 [Daucus carota subsp. sativus]	Calpain-type cysteine protease DEK1 OS=Arabidopsis thaliana GN=DEK1 PE=1 SV=1		[OT] KOG0045 Cytosolic Ca2+-dependent cysteine protease (calpain), large subunit (EF-Hand protein superfamily)
CL1027.Contig22_All	K08726//soluble epoxide hydrolase / lipid-phosphate phosphatase [EC:3.3.2.10 3.1.3.76]+ko04146//Peroxisome+ko00590//Arachidonic acid metabolism+ko01100//Metabolic pathways;K10144//RING finger and CHY zinc finger domain-containing protein 1 [EC:2.3.2.27]+ko04120//Ubiquitin mediated proteolysis	PREDICTED: bifunctional epoxide hydrolase 2-like [Daucus carota subsp. sativus] >KZM84467.1 hypothetical protein DCAR_028111 [Daucus carota subsp. sativus]
CL1027.Contig23_All	K13338//peroxin-1+ko04146//Peroxisome;K08726//soluble epoxide hydrolase / lipid-phosphate phosphatase [EC:3.3.2.10 3.1.3.76]+ko04146//Peroxisome+ko00590//Arachidonic acid metabolism+ko01100//Metabolic pathways	epoxide hydrolase-like protein [Medicago truncatula] >KEH31110.1 epoxide hydrolase-like protein [Medicago truncatula]	Calpain-type cysteine protease DEK1 OS=Arabidopsis thaliana GN=DEK1 PE=1 SV=1		[OT] KOG0045 Cytosolic Ca2+-dependent cysteine protease (calpain), large subunit (EF-Hand protein superfamily)
CL1027.Contig24_All	K08726//soluble epoxide hydrolase / lipid-phosphate phosphatase [EC:3.3.2.10 3.1.3.76]+ko04146//Peroxisome+ko00590//Arachidonic acid metabolism+ko01100//Metabolic pathways;K10144//RING finger and CHY zinc finger domain-containing protein 1 [EC:2.3.2.27]+ko04120//Ubiquitin mediated proteolysis;K15718//linoleate 9S-lipoxygenase [EC:1.13.11.58]+ko00591//Linoleic acid metabolism	PREDICTED: bifunctional epoxide hydrolase 2-like [Daucus carota subsp. sativus] >KZM84467.1 hypothetical protein DCAR_028111 [Daucus carota subsp. sativus]	Calpain-type cysteine protease DEK1 OS=Arabidopsis thaliana GN=DEK1 PE=1 SV=1		[OT] KOG0045 Cytosolic Ca2+-dependent cysteine protease (calpain), large subunit (EF-Hand protein superfamily)
CL1027.Contig25_All	K15718//linoleate 9S-lipoxygenase [EC:1.13.11.58]+ko00591//Linoleic acid metabolism	PREDICTED: probable linoleate 9S-lipoxygenase 5 [Daucus carota subsp. sativus]	Linoleate 9S-lipoxygenase 5, chloroplastic OS=Arabidopsis thaliana GN=LOX5 PE=2 SV=2		[I] TWOG0111 Lipoxygenase
CL1027.Contig4_All	K08726//soluble epoxide hydrolase / lipid-phosphate phosphatase [EC:3.3.2.10 3.1.3.76]+ko04146//Peroxisome+ko00590//Arachidonic acid metabolism+ko01100//Metabolic pathways;K15718//linoleate 9S-lipoxygenase [EC:1.13.11.58]+ko00591//Linoleic acid metabolism	epoxide hydrolase-like protein [Medicago truncatula] >KEH31110.1 epoxide hydrolase-like protein [Medicago truncatula]	Linoleate 9S-lipoxygenase 1 OS=Arabidopsis thaliana GN=LOX1 PE=1 SV=1		[I] TWOG0111 Lipoxygenase
CL1027.Contig5_All	K15718//linoleate 9S-lipoxygenase [EC:1.13.11.58]+ko00591//Linoleic acid metabolism	PREDICTED: calpain-type cysteine protease DEK1-like isoform X1 [Nicotiana tabacum]	Calpain-type cysteine protease DEK1 OS=Arabidopsis thaliana GN=DEK1 PE=1 SV=1		[OT] KOG0045 Cytosolic Ca2+-dependent cysteine protease (calpain), large subunit (EF-Hand protein superfamily)
CL1027.Contig6_All	K08726//soluble epoxide hydrolase / lipid-phosphate phosphatase [EC:3.3.2.10 3.1.3.76]+ko04146//Peroxisome+ko00590//Arachidonic acid metabolism+ko01100//Metabolic pathways;K15718//linoleate 9S-lipoxygenase [EC:1.13.11.58]+ko00591//Linoleic acid metabolism	epoxide hydrolase-like protein [Medicago truncatula] >KEH31110.1 epoxide hydrolase-like protein [Medicago truncatula]	Linoleate 9S-lipoxygenase 1 OS=Arabidopsis thaliana GN=LOX1 PE=1 SV=1		[I] TWOG0111 Lipoxygenase
CL1027.Contig7_All	K08726//soluble epoxide hydrolase / lipid-phosphate phosphatase [EC:3.3.2.10 3.1.3.76]+ko04146//Peroxisome+ko00590//Arachidonic acid metabolism+ko01100//Metabolic pathways;K15718//linoleate 9S-lipoxygenase [EC:1.13.11.58]+ko00591//Linoleic acid metabolism	epoxide hydrolase-like protein [Medicago truncatula] >KEH31110.1 epoxide hydrolase-like protein [Medicago truncatula]	Calpain-type cysteine protease DEK1 OS=Arabidopsis thaliana GN=DEK1 PE=1 SV=1		[OT] KOG0045 Cytosolic Ca2+-dependent cysteine protease (calpain), large subunit (EF-Hand protein superfamily)
CL1027.Contig8_All	K08726//soluble epoxide hydrolase / lipid-phosphate phosphatase [EC:3.3.2.10 3.1.3.76]+ko04146//Peroxisome+ko00590//Arachidonic acid metabolism+ko01100//Metabolic pathways	epoxide hydrolase-like protein [Medicago truncatula] >KEH31110.1 epoxide hydrolase-like protein [Medicago truncatula]
CL1027.Contig9_All	K08726//soluble epoxide hydrolase / lipid-phosphate phosphatase [EC:3.3.2.10 3.1.3.76]+ko04146//Peroxisome+ko00590//Arachidonic acid metabolism+ko01100//Metabolic pathways;K10144//RING finger and CHY zinc finger domain-containing protein 1 [EC:2.3.2.27]+ko04120//Ubiquitin mediated proteolysis	PREDICTED: bifunctional epoxide hydrolase 2-like [Daucus carota subsp. sativus] >KZM84467.1 hypothetical protein DCAR_028111 [Daucus carota subsp. sativus]
CL10270.Contig1_All	K09645//vitellogenic carboxypeptidase-like protein [EC:3.4.16.-]	PREDICTED: serine carboxypeptidase-like 50 [Daucus carota subsp. sativus] >KZM82653.1 hypothetical protein DCAR_030222 [Daucus carota subsp. sativus]	Serine carboxypeptidase-like 50 OS=Arabidopsis thaliana GN=SCPL50 PE=2 SV=1	Serine carboxypeptidase	[OE] KOG1282 Serine carboxypeptidases (lysosomal cathepsin A)
CL10270.Contig2_All	K09645//vitellogenic carboxypeptidase-like protein [EC:3.4.16.-]	hypothetical protein DCAR_030221 [Daucus carota subsp. sativus]	Serine carboxypeptidase-like 50 OS=Arabidopsis thaliana GN=SCPL50 PE=2 SV=1	Serine carboxypeptidase	[OE] KOG1282 Serine carboxypeptidases (lysosomal cathepsin A)
CL10271.Contig1_All	K04498//E1A/CREB-binding protein [EC:2.3.1.48]	PREDICTED: probable histone acetyltransferase HAC-like 1 isoform X1 [Daucus carota subsp. sativus]
CL10271.Contig2_All	K04498//E1A/CREB-binding protein [EC:2.3.1.48]	PREDICTED: probable histone acetyltransferase HAC-like 1 isoform X1 [Daucus carota subsp. sativus]
CL10271.Contig3_All	K04498//E1A/CREB-binding protein [EC:2.3.1.48]	hypothetical protein DCAR_010975 [Daucus carota subsp. sativus]
CL10272.Contig1_All	K09775//uncharacterized protein	PREDICTED: uncharacterized protein LOC108202890 [Daucus carota subsp. sativus]		Core-2/I-Branching enzyme	[S] LSE0353 A Uncharacterized protein
CL10272.Contig2_All	K09775//uncharacterized protein	PREDICTED: uncharacterized protein LOC108202890 [Daucus carota subsp. sativus]		Core-2/I-Branching enzyme	[S] LSE0353 A Uncharacterized protein
CL10272.Contig3_All	K09775//uncharacterized protein	PREDICTED: uncharacterized protein LOC108202890 [Daucus carota subsp. sativus]		Core-2/I-Branching enzyme	[S] LSE0353 A Uncharacterized protein
CL10274.Contig1_All	K05290//phosphatidylinositol glycan, class K [EC:2.6.-.-]+ko01100//Metabolic pathways+ko00563//Glycosylphosphatidylinositol (GPI)-anchor biosynthesis	PREDICTED: putative GPI-anchor transamidase [Daucus carota subsp. sativus] >XP_017242731.1 PREDICTED: putative GPI-anchor transamidase [Daucus carota subsp. sativus]	Vacuolar-processing enzyme beta-isozyme OS=Arabidopsis thaliana GN=bVPE PE=2 SV=3	Peptidase C13 family	[O] KOG1349 Gpi-anchor transamidase
CL10274.Contig2_All	K05290//phosphatidylinositol glycan, class K [EC:2.6.-.-]+ko01100//Metabolic pathways+ko00563//Glycosylphosphatidylinositol (GPI)-anchor biosynthesis	PREDICTED: putative GPI-anchor transamidase [Daucus carota subsp. sativus] >XP_017242731.1 PREDICTED: putative GPI-anchor transamidase [Daucus carota subsp. sativus]
CL10275.Contig1_All		PREDICTED: transcription factor VOZ1 isoform X1 [Daucus carota subsp. sativus]	Transcription factor VOZ2 OS=Arabidopsis thaliana GN=VOZ2 PE=1 SV=2	Perilipin family
CL10275.Contig2_All		PREDICTED: transcription factor VOZ1 isoform X1 [Daucus carota subsp. sativus]	Transcription factor VOZ1 OS=Arabidopsis thaliana GN=VOZ1 PE=1 SV=1
CL10275.Contig3_All		PREDICTED: transcription factor VOZ1 isoform X1 [Daucus carota subsp. sativus]	Transcription factor VOZ1 OS=Arabidopsis thaliana GN=VOZ1 PE=1 SV=1	Keratin, high-sulphur matrix protein
CL10275.Contig4_All		PREDICTED: transcription factor VOZ1 isoform X1 [Daucus carota subsp. sativus]	Transcription factor VOZ1 OS=Arabidopsis thaliana GN=VOZ1 PE=1 SV=1	Keratin, high-sulphur matrix protein
CL10276.Contig1_All	K09287//RAV-like factor	PREDICTED: AP2/ERF and B3 domain-containing transcription factor RAV1 [Daucus carota subsp. sativus] >KZM86549.1 hypothetical protein DCAR_023683 [Daucus carota subsp. sativus]	AP2/ERF and B3 domain-containing transcription repressor TEM1 OS=Arabidopsis thaliana GN=TEM1 PE=1 SV=1	B3 DNA binding domain	[TK] LSE0285 A APETALA2 and related transcription factors
CL10276.Contig2_All	K09287//RAV-like factor	PREDICTED: AP2/ERF and B3 domain-containing transcription factor RAV1 [Daucus carota subsp. sativus] >KZM86549.1 hypothetical protein DCAR_023683 [Daucus carota subsp. sativus]	AP2/ERF and B3 domain-containing transcription repressor TEM1 OS=Arabidopsis thaliana GN=TEM1 PE=1 SV=1		[TK] LSE0285 A APETALA2 and related transcription factors
CL10277.Contig1_All	K20303//trafficking protein particle complex subunit 4	PREDICTED: trafficking protein particle complex subunit 4-like [Daucus carota subsp. sativus] >XP_017255599.1 PREDICTED: trafficking protein particle complex subunit 4-like [Daucus carota subsp. sativus] >KZM90466.1 hypothetical protein DCAR_022169 [Daucus carota subsp. sativus]		Sybindin-like family	[U] KOG3369 Transport protein particle (TRAPP) complex subunit
CL10277.Contig2_All	K20303//trafficking protein particle complex subunit 4	PREDICTED: trafficking protein particle complex subunit 4-like [Daucus carota subsp. sativus] >XP_017255599.1 PREDICTED: trafficking protein particle complex subunit 4-like [Daucus carota subsp. sativus] >KZM90466.1 hypothetical protein DCAR_022169 [Daucus carota subsp. sativus]		Sybindin-like family	[U] KOG3369 Transport protein particle (TRAPP) complex subunit
CL10278.Contig1_All		PREDICTED: nicalin-1 [Daucus carota subsp. sativus] >KZN05334.1 hypothetical protein DCAR_006171 [Daucus carota subsp. sativus]			[E] KOG2526 Predicted aminopeptidases - M20/M25/M40 family
CL10278.Contig2_All		PREDICTED: nicalin-1 [Daucus carota subsp. sativus] >KZN05334.1 hypothetical protein DCAR_006171 [Daucus carota subsp. sativus]		Nicastrin	[E] KOG2526 Predicted aminopeptidases - M20/M25/M40 family
CL10278.Contig3_All		PREDICTED: nicalin-1 [Daucus carota subsp. sativus] >KZN05334.1 hypothetical protein DCAR_006171 [Daucus carota subsp. sativus]			[E] KOG2526 Predicted aminopeptidases - M20/M25/M40 family
CL10279.Contig1_All	K02937//large subunit ribosomal protein L7e+ko03010//Ribosome	PREDICTED: 60S ribosomal protein L7-1 [Daucus carota subsp. sativus] >XP_017215386.1 PREDICTED: 60S ribosomal protein L7-1 [Daucus carota subsp. sativus] >KZM88502.1 hypothetical protein DCAR_025577 [Daucus carota subsp. sativus]	60S ribosomal protein L7-2 OS=Arabidopsis thaliana GN=RPL7B PE=1 SV=1	Ribosomal protein L30p/L7e	[J] KOG3184 60S ribosomal protein L7
CL10279.Contig2_All	K02937//large subunit ribosomal protein L7e+ko03010//Ribosome	PREDICTED: 60S ribosomal protein L7-1 [Daucus carota subsp. sativus] >XP_017215386.1 PREDICTED: 60S ribosomal protein L7-1 [Daucus carota subsp. sativus] >KZM88502.1 hypothetical protein DCAR_025577 [Daucus carota subsp. sativus]	60S ribosomal protein L7-3 OS=Arabidopsis thaliana GN=RPL7C PE=2 SV=1	Ribosomal protein L30p/L7e	[J] KOG3184 60S ribosomal protein L7
CL10279.Contig3_All	K02937//large subunit ribosomal protein L7e+ko03010//Ribosome	PREDICTED: 60S ribosomal protein L7-1 [Daucus carota subsp. sativus] >XP_017215386.1 PREDICTED: 60S ribosomal protein L7-1 [Daucus carota subsp. sativus] >KZM88502.1 hypothetical protein DCAR_025577 [Daucus carota subsp. sativus]	60S ribosomal protein L7-1 OS=Arabidopsis thaliana GN=RPL7A PE=2 SV=1	Ribosomal protein L30p/L7e	[J] KOG3184 60S ribosomal protein L7
CL10279.Contig4_All	K02937//large subunit ribosomal protein L7e+ko03010//Ribosome	PREDICTED: 60S ribosomal protein L7-1 [Daucus carota subsp. sativus] >XP_017215386.1 PREDICTED: 60S ribosomal protein L7-1 [Daucus carota subsp. sativus] >KZM88502.1 hypothetical protein DCAR_025577 [Daucus carota subsp. sativus]	60S ribosomal protein L7-1 OS=Arabidopsis thaliana GN=RPL7A PE=2 SV=1	Ribosomal L30 N-terminal domain	[J] KOG3184 60S ribosomal protein L7
CL1028.Contig1_All				NADH dehydrogenase
CL10280.Contig1_All		PREDICTED: uncharacterized protein LOC108196824 isoform X2 [Daucus carota subsp. sativus]
CL10280.Contig2_All		PREDICTED: uncharacterized protein LOC108196824 isoform X2 [Daucus carota subsp. sativus]		Cleavage site for pathogenic type III effector avirulence factor Avr
CL10281.Contig10_All	K13339//peroxin-6+ko04146//Peroxisome	PREDICTED: peroxisome biogenesis protein 6 [Daucus carota subsp. sativus]	Peroxisome biogenesis protein 6 OS=Arabidopsis thaliana GN=PEX6 PE=1 SV=1	ATPase family associated with various cellular activities (AAA)	[O] KOG0736 Peroxisome assembly factor 2 containing the AAA+-type ATPase domain
CL10281.Contig11_All	K01853//cycloartenol synthase [EC:5.4.99.8]+ko01100//Metabolic pathways+ko01110//Biosynthesis of secondary metabolites+ko00100//Steroid biosynthesis	cycloartenol synthase 2 [Herrania umbratica]	Cycloartenol synthase OS=Glycyrrhiza glabra GN=GgCAS1 PE=1 SV=1		[I] KOG0497 Oxidosqualene-lanosterol cyclase and related proteins
CL10281.Contig12_All	K01853//cycloartenol synthase [EC:5.4.99.8]+ko01100//Metabolic pathways+ko01110//Biosynthesis of secondary metabolites+ko00100//Steroid biosynthesis	cycloartenol synthase 2 [Herrania umbratica]	Cycloartenol synthase OS=Ricinus communis PE=1 SV=1		[I] KOG0497 Oxidosqualene-lanosterol cyclase and related proteins
CL10281.Contig13_All	K13339//peroxin-6+ko04146//Peroxisome	PREDICTED: peroxisome biogenesis protein 6 [Daucus carota subsp. sativus]	Peroxisome biogenesis protein 6 OS=Arabidopsis thaliana GN=PEX6 PE=1 SV=1	ATPase family associated with various cellular activities (AAA)	[O] KOG0736 Peroxisome assembly factor 2 containing the AAA+-type ATPase domain
CL10281.Contig14_All	K13339//peroxin-6+ko04146//Peroxisome	PREDICTED: peroxisome biogenesis protein 6 [Daucus carota subsp. sativus]	Peroxisome biogenesis protein 6 OS=Arabidopsis thaliana GN=PEX6 PE=1 SV=1	ATPase family associated with various cellular activities (AAA)	[O] KOG0736 Peroxisome assembly factor 2 containing the AAA+-type ATPase domain
CL10281.Contig15_All	K13339//peroxin-6+ko04146//Peroxisome	PREDICTED: peroxisome biogenesis protein 6 [Daucus carota subsp. sativus]	Peroxisome biogenesis protein 6 OS=Arabidopsis thaliana GN=PEX6 PE=1 SV=1	ATPase family associated with various cellular activities (AAA)	[O] KOG0736 Peroxisome assembly factor 2 containing the AAA+-type ATPase domain
CL10281.Contig16_All	K01853//cycloartenol synthase [EC:5.4.99.8]+ko01100//Metabolic pathways+ko01110//Biosynthesis of secondary metabolites+ko00100//Steroid biosynthesis	cycloartenol synthase 2 [Herrania umbratica]	Cycloartenol synthase OS=Glycyrrhiza glabra GN=GgCAS1 PE=1 SV=1		[I] KOG0497 Oxidosqualene-lanosterol cyclase and related proteins
CL10281.Contig17_All	K01853//cycloartenol synthase [EC:5.4.99.8]+ko01100//Metabolic pathways+ko01110//Biosynthesis of secondary metabolites+ko00100//Steroid biosynthesis	cycloartenol synthase 2 [Herrania umbratica]	Cycloartenol synthase OS=Glycyrrhiza glabra GN=GgCAS1 PE=1 SV=1		[I] KOG0497 Oxidosqualene-lanosterol cyclase and related proteins
CL10281.Contig18_All	K01853//cycloartenol synthase [EC:5.4.99.8]+ko01100//Metabolic pathways+ko01110//Biosynthesis of secondary metabolites+ko00100//Steroid biosynthesis	cycloartenol synthase 2 [Herrania umbratica]	Cycloartenol synthase OS=Ricinus communis PE=1 SV=1		[I] KOG0497 Oxidosqualene-lanosterol cyclase and related proteins
CL10281.Contig19_All	K01853//cycloartenol synthase [EC:5.4.99.8]+ko01100//Metabolic pathways+ko01110//Biosynthesis of secondary metabolites+ko00100//Steroid biosynthesis	cycloartenol synthase 2 [Herrania umbratica]	Cycloartenol synthase OS=Ricinus communis PE=1 SV=1		[I] KOG0497 Oxidosqualene-lanosterol cyclase and related proteins
CL10281.Contig1_All	K01853//cycloartenol synthase [EC:5.4.99.8]+ko01100//Metabolic pathways+ko01110//Biosynthesis of secondary metabolites+ko00100//Steroid biosynthesis	PREDICTED: cycloartenol Synthase-like [Daucus carota subsp. sativus]	Cycloartenol synthase OS=Glycyrrhiza glabra GN=GgCAS1 PE=1 SV=1	Squalene-hopene cyclase N-terminal domain	[I] KOG0497 Oxidosqualene-lanosterol cyclase and related proteins
CL10281.Contig20_All	K01853//cycloartenol synthase [EC:5.4.99.8]+ko01100//Metabolic pathways+ko01110//Biosynthesis of secondary metabolites+ko00100//Steroid biosynthesis	cycloartenol synthase 2 [Herrania umbratica]	Cycloartenol synthase OS=Ricinus communis PE=1 SV=1		[I] KOG0497 Oxidosqualene-lanosterol cyclase and related proteins
CL10281.Contig21_All	K01853//cycloartenol synthase [EC:5.4.99.8]+ko01100//Metabolic pathways+ko01110//Biosynthesis of secondary metabolites+ko00100//Steroid biosynthesis	cycloartenol synthase 2 [Herrania umbratica]	Cycloartenol synthase OS=Ricinus communis PE=1 SV=1		[I] KOG0497 Oxidosqualene-lanosterol cyclase and related proteins
CL10281.Contig22_All	K01853//cycloartenol synthase [EC:5.4.99.8]+ko01100//Metabolic pathways+ko01110//Biosynthesis of secondary metabolites+ko00100//Steroid biosynthesis	cycloartenol synthase 2 [Herrania umbratica]	Cycloartenol synthase OS=Ricinus communis PE=1 SV=1		[I] KOG0497 Oxidosqualene-lanosterol cyclase and related proteins
CL10281.Contig23_All	K01853//cycloartenol synthase [EC:5.4.99.8]+ko01100//Metabolic pathways+ko01110//Biosynthesis of secondary metabolites+ko00100//Steroid biosynthesis	cycloartenol synthase 2 [Herrania umbratica]	Cycloartenol synthase OS=Glycyrrhiza glabra GN=GgCAS1 PE=1 SV=1		[I] KOG0497 Oxidosqualene-lanosterol cyclase and related proteins
CL10281.Contig24_All	K01853//cycloartenol synthase [EC:5.4.99.8]+ko01100//Metabolic pathways+ko01110//Biosynthesis of secondary metabolites+ko00100//Steroid biosynthesis	cycloartenol synthase 2 [Herrania umbratica]	Cycloartenol synthase OS=Ricinus communis PE=1 SV=1		[I] KOG0497 Oxidosqualene-lanosterol cyclase and related proteins
CL10281.Contig25_All	K01853//cycloartenol synthase [EC:5.4.99.8]+ko01100//Metabolic pathways+ko01110//Biosynthesis of secondary metabolites+ko00100//Steroid biosynthesis	cycloartenol synthase 2 [Herrania umbratica]	Cycloartenol synthase OS=Glycyrrhiza glabra GN=GgCAS1 PE=1 SV=1		[I] KOG0497 Oxidosqualene-lanosterol cyclase and related proteins
CL10281.Contig26_All	K13339//peroxin-6+ko04146//Peroxisome	PREDICTED: peroxisome biogenesis protein 6 [Daucus carota subsp. sativus]	Peroxisome biogenesis protein 6 OS=Arabidopsis thaliana GN=PEX6 PE=1 SV=1	ATPase family associated with various cellular activities (AAA)	[O] KOG0736 Peroxisome assembly factor 2 containing the AAA+-type ATPase domain
CL10281.Contig27_All	K13339//peroxin-6+ko04146//Peroxisome	PREDICTED: peroxisome biogenesis protein 6 [Daucus carota subsp. sativus]	Peroxisome biogenesis protein 6 OS=Arabidopsis thaliana GN=PEX6 PE=1 SV=1		[O] KOG0736 Peroxisome assembly factor 2 containing the AAA+-type ATPase domain
CL10281.Contig28_All	K13339//peroxin-6+ko04146//Peroxisome	PREDICTED: peroxisome biogenesis protein 6 [Daucus carota subsp. sativus]	Peroxisome biogenesis protein 6 OS=Arabidopsis thaliana GN=PEX6 PE=1 SV=1	ATPase family associated with various cellular activities (AAA)	[O] KOG0736 Peroxisome assembly factor 2 containing the AAA+-type ATPase domain
CL10281.Contig29_All	K13339//peroxin-6+ko04146//Peroxisome	PREDICTED: peroxisome biogenesis protein 6 [Daucus carota subsp. sativus]	Peroxisome biogenesis protein 6 OS=Arabidopsis thaliana GN=PEX6 PE=1 SV=1	ATPase family associated with various cellular activities (AAA)	[O] KOG0736 Peroxisome assembly factor 2 containing the AAA+-type ATPase domain
CL10281.Contig2_All	K01853//cycloartenol synthase [EC:5.4.99.8]+ko01100//Metabolic pathways+ko01110//Biosynthesis of secondary metabolites+ko00100//Steroid biosynthesis	PREDICTED: cycloartenol Synthase [Vitis vinifera] >XP_019078549.1 PREDICTED: cycloartenol Synthase [Vitis vinifera] >CBI24077.3 unnamed protein product, partial [Vitis vinifera]	Cycloartenol synthase OS=Kalanchoe daigremontiana PE=1 SV=1	Squalene-hopene cyclase N-terminal domain	[I] KOG0497 Oxidosqualene-lanosterol cyclase and related proteins
CL10281.Contig30_All	K13339//peroxin-6+ko04146//Peroxisome	PREDICTED: peroxisome biogenesis protein 6 [Daucus carota subsp. sativus]	Peroxisome biogenesis protein 6 OS=Arabidopsis thaliana GN=PEX6 PE=1 SV=1	ATPase family associated with various cellular activities (AAA)	[O] KOG0736 Peroxisome assembly factor 2 containing the AAA+-type ATPase domain
CL10281.Contig3_All	K01853//cycloartenol synthase [EC:5.4.99.8]+ko01100//Metabolic pathways+ko01110//Biosynthesis of secondary metabolites+ko00100//Steroid biosynthesis	PREDICTED: cycloartenol Synthase-like [Daucus carota subsp. sativus]	Cycloartenol synthase OS=Glycyrrhiza glabra GN=GgCAS1 PE=1 SV=1	Squalene-hopene cyclase N-terminal domain	[I] KOG0497 Oxidosqualene-lanosterol cyclase and related proteins
CL10281.Contig4_All	K01853//cycloartenol synthase [EC:5.4.99.8]+ko01100//Metabolic pathways+ko01110//Biosynthesis of secondary metabolites+ko00100//Steroid biosynthesis	PREDICTED: cycloartenol Synthase [Daucus carota subsp. sativus] >XP_017246652.1 PREDICTED: cycloartenol Synthase [Daucus carota subsp. sativus] >XP_017246653.1 PREDICTED: cycloartenol Synthase [Daucus carota subsp. sativus]	Cycloartenol Synthase OS=Panax ginseng GN=OSCPNX1 PE=1 SV=1	Squalene-hopene cyclase N-terminal domain	[I] KOG0497 Oxidosqualene-lanosterol cyclase and related proteins
CL10281.Contig5_All	K01853//cycloartenol synthase [EC:5.4.99.8]+ko01100//Metabolic pathways+ko01110//Biosynthesis of secondary metabolites+ko00100//Steroid biosynthesis	PREDICTED: cycloartenol Synthase [Daucus carota subsp. sativus] >XP_017246652.1 PREDICTED: cycloartenol Synthase [Daucus carota subsp. sativus] >XP_017246653.1 PREDICTED: cycloartenol Synthase [Daucus carota subsp. sativus]	Cycloartenol Synthase OS=Panax ginseng GN=OSCPNX1 PE=1 SV=1	Squalene-hopene cyclase N-terminal domain	[I] KOG0497 Oxidosqualene-lanosterol cyclase and related proteins
CL10281.Contig6_All	K01853//cycloartenol synthase [EC:5.4.99.8]+ko01100//Metabolic pathways+ko01110//Biosynthesis of secondary metabolites+ko00100//Steroid biosynthesis	cycloartenol synthase 2 [Herrania umbratica]	Cycloartenol synthase OS=Ricinus communis PE=1 SV=1		[I] KOG0497 Oxidosqualene-lanosterol cyclase and related proteins
CL10281.Contig7_All	K01853//cycloartenol synthase [EC:5.4.99.8]+ko01100//Metabolic pathways+ko01110//Biosynthesis of secondary metabolites+ko00100//Steroid biosynthesis	cycloartenol synthase 2 [Herrania umbratica]	Cycloartenol synthase OS=Ricinus communis PE=1 SV=1		[I] KOG0497 Oxidosqualene-lanosterol cyclase and related proteins
CL10281.Contig8_All	K01853//cycloartenol synthase [EC:5.4.99.8]+ko01100//Metabolic pathways+ko01110//Biosynthesis of secondary metabolites+ko00100//Steroid biosynthesis	cycloartenol synthase 2 [Herrania umbratica]	Cycloartenol synthase OS=Ricinus communis PE=1 SV=1		[I] KOG0497 Oxidosqualene-lanosterol cyclase and related proteins
CL10281.Contig9_All	K01853//cycloartenol synthase [EC:5.4.99.8]+ko01100//Metabolic pathways+ko01110//Biosynthesis of secondary metabolites+ko00100//Steroid biosynthesis	cycloartenol synthase 2 [Herrania umbratica]	Cycloartenol synthase OS=Ricinus communis PE=1 SV=1		[I] KOG0497 Oxidosqualene-lanosterol cyclase and related proteins
CL10282.Contig1_All	K15078//structure-specific endonuclease subunit SLX1 [EC:3.6.1.-];K19613//leucine-rich repeat protein SHOC2	PREDICTED: putative disease resistance protein RGA4 [Daucus carota subsp. sativus] >KZM88011.1 hypothetical protein DCAR_031534 [Daucus carota subsp. sativus]	Disease resistance protein RGA2 OS=Solanum bulbocastanum GN=RGA2 PE=1 SV=1	Leucine Rich repeats (2 copies)	[G] KOG2246 Galactosyltransferases
CL10282.Contig2_All	K19613//leucine-rich repeat protein SHOC2	PREDICTED: putative disease resistance protein RGA4 [Daucus carota subsp. sativus]		Leucine rich repeat
CL10283.Contig1_All		PREDICTED: uncharacterized protein SYNPCC7002_A1590 [Daucus carota subsp. sativus]		Protein of unknown function (DUF1997)
CL10283.Contig2_All		PREDICTED: uncharacterized protein SYNPCC7002_A1590 [Daucus carota subsp. sativus]		Protein of unknown function (DUF1997)
CL10284.Contig1_All	K11136//regulator of telomere elongation helicase 1 [EC:3.6.4.12]	PREDICTED: regulator of telomere elongation helicase 1 isoform X1 [Daucus carota subsp. sativus] >KZM92977.1 hypothetical protein DCAR_016222 [Daucus carota subsp. sativus]	DNA repair helicase XPD OS=Arabidopsis thaliana GN=XPD PE=1 SV=1	Helicase C-terminal domain	[L] KOG1132 Helicase of the DEAD superfamily
CL10284.Contig2_All	K11136//regulator of telomere elongation helicase 1 [EC:3.6.4.12]	PREDICTED: regulator of telomere elongation helicase 1 isoform X2 [Daucus carota subsp. sativus]	DNA repair helicase XPD OS=Arabidopsis thaliana GN=XPD PE=1 SV=1	Helicase C-terminal domain	[L] KOG1132 Helicase of the DEAD superfamily
CL10285.Contig1_All	K13420//LRR receptor-like serine/threonine-protein kinase FLS2 [EC:2.7.11.1]+ko04016//MAPK signaling pathway - plant+ko04626//Plant-pathogen interaction	PREDICTED: leucine-rich repeat receptor-like protein kinase PXL1 [Daucus carota subsp. sativus] >KZM96660.1 hypothetical protein DCAR_015978 [Daucus carota subsp. sativus]	Receptor-like protein 12 OS=Arabidopsis thaliana GN=RLP12 PE=2 SV=2	Leucine rich repeat	[R] KOG0619 FOG: Leucine rich repeat
CL10285.Contig2_All	K13420//LRR receptor-like serine/threonine-protein kinase FLS2 [EC:2.7.11.1]+ko04016//MAPK signaling pathway - plant+ko04626//Plant-pathogen interaction	MDIS1-interacting receptor like kinase 2-like [Carica papaya]	LRR receptor-like serine/threonine-protein kinase GSO2 OS=Arabidopsis thaliana GN=GSO2 PE=1 SV=2	Leucine rich repeat	[R] KOG0619 FOG: Leucine rich repeat
CL10285.Contig3_All	K13420//LRR receptor-like serine/threonine-protein kinase FLS2 [EC:2.7.11.1]+ko04016//MAPK signaling pathway - plant+ko04626//Plant-pathogen interaction	PREDICTED: leucine-rich repeat receptor-like protein kinase PXL1 [Daucus carota subsp. sativus] >KZM96660.1 hypothetical protein DCAR_015978 [Daucus carota subsp. sativus]	Receptor-like protein 51 OS=Arabidopsis thaliana GN=RLP51 PE=1 SV=1	Leucine rich repeat	[R] KOG0619 FOG: Leucine rich repeat
CL10286.Contig1_All	K08332//vacuolar protein 8	PREDICTED: armadillo repeat-containing protein 4-like [Daucus carota subsp. sativus] >XP_017247898.1 PREDICTED: armadillo repeat-containing protein 4-like [Daucus carota subsp. sativus] >KZM96633.1 hypothetical protein DCAR_016005 [Daucus carota subsp. sativus]		Armadillo/beta-catenin-like repeat	[S] KOG0167 FOG: Armadillo/beta-catenin-like repeats
CL10286.Contig2_All	K08332//vacuolar protein 8	PREDICTED: uncharacterized protein LOC108196839 isoform X1 [Daucus carota subsp. sativus]	U-box domain-containing protein 3 OS=Arabidopsis thaliana GN=PUB3 PE=2 SV=2	Armadillo/beta-catenin-like repeat	[S] KOG0167 FOG: Armadillo/beta-catenin-like repeats
CL10287.Contig1_All		PREDICTED: uncharacterized protein LOC108220204 [Daucus carota subsp. sativus] >KZM93972.1 hypothetical protein DCAR_017217 [Daucus carota subsp. sativus]
CL10287.Contig2_All		PREDICTED: uncharacterized protein LOC108220204 [Daucus carota subsp. sativus] >KZM93972.1 hypothetical protein DCAR_017217 [Daucus carota subsp. sativus]		Menin
CL10287.Contig3_All		PREDICTED: uncharacterized protein LOC108220204 [Daucus carota subsp. sativus] >KZM93972.1 hypothetical protein DCAR_017217 [Daucus carota subsp. sativus]		Menin
CL10287.Contig4_All		PREDICTED: uncharacterized protein LOC108220204 [Daucus carota subsp. sativus] >KZM93972.1 hypothetical protein DCAR_017217 [Daucus carota subsp. sativus]
CL10287.Contig5_All		PREDICTED: uncharacterized protein LOC108220204 [Daucus carota subsp. sativus] >KZM93972.1 hypothetical protein DCAR_017217 [Daucus carota subsp. sativus]
CL10288.Contig1_All	K03844//alpha-1,2-mannosyltransferase [EC:2.4.1.131]+ko00510//N-Glycan biosynthesis+ko01100//Metabolic pathways	PREDICTED: ACT domain-containing protein ACR11-like [Daucus carota subsp. sativus]	ACT domain-containing protein ACR11 OS=Arabidopsis thaliana GN=ACR11 PE=1 SV=1	Putative peptidoglycan binding domain	[R] LSE0441 A ACT domain
CL10288.Contig2_All		PREDICTED: ACT domain-containing protein ACR11-like [Daucus carota subsp. sativus]	ACT domain-containing protein ACR11 OS=Arabidopsis thaliana GN=ACR11 PE=1 SV=1		[R] LSE0441 A ACT domain
CL10288.Contig3_All	K03844//alpha-1,2-mannosyltransferase [EC:2.4.1.131]+ko00510//N-Glycan biosynthesis+ko01100//Metabolic pathways	PREDICTED: ACT domain-containing protein ACR11-like [Daucus carota subsp. sativus]	ACT domain-containing protein ACR11 OS=Arabidopsis thaliana GN=ACR11 PE=1 SV=1	ACT domain	[R] LSE0441 A ACT domain
CL10288.Contig4_All	K03844//alpha-1,2-mannosyltransferase [EC:2.4.1.131]+ko00510//N-Glycan biosynthesis+ko01100//Metabolic pathways	hypothetical protein DCAR_021386 [Daucus carota subsp. sativus]	ACT domain-containing protein ACR11 OS=Arabidopsis thaliana GN=ACR11 PE=1 SV=1	ACT domain	[R] LSE0441 A ACT domain
CL10288.Contig5_All	K03844//alpha-1,2-mannosyltransferase [EC:2.4.1.131]+ko00510//N-Glycan biosynthesis+ko01100//Metabolic pathways	hypothetical protein DCAR_021386 [Daucus carota subsp. sativus]	ACT domain-containing protein ACR11 OS=Arabidopsis thaliana GN=ACR11 PE=1 SV=1	ACT domain	[R] LSE0441 A ACT domain
CL10288.Contig6_All	K03844//alpha-1,2-mannosyltransferase [EC:2.4.1.131]+ko00510//N-Glycan biosynthesis+ko01100//Metabolic pathways	PREDICTED: ACT domain-containing protein ACR11-like [Daucus carota subsp. sativus]	ACT domain-containing protein ACR11 OS=Arabidopsis thaliana GN=ACR11 PE=1 SV=1	ACT domain	[R] LSE0441 A ACT domain
CL10289.Contig1_All		PREDICTED: AT-hook motif nuclear-localized protein 5-like [Daucus carota subsp. sativus]	AT-hook motif nuclear-localized protein 12 OS=Arabidopsis thaliana GN=AHL12 PE=1 SV=1	AT hook motif	[S] LSE0374 A Uncharacterized
CL10289.Contig2_All		PREDICTED: AT-hook motif nuclear-localized protein 5-like [Daucus carota subsp. sativus]	AT-hook motif nuclear-localized protein 12 OS=Arabidopsis thaliana GN=AHL12 PE=1 SV=1	Domain of unknown function (DUF296)	[S] LSE0374 A Uncharacterized
CL10289.Contig3_All		PREDICTED: AT-hook motif nuclear-localized protein 5-like [Daucus carota subsp. sativus]	AT-hook motif nuclear-localized protein 12 OS=Arabidopsis thaliana GN=AHL12 PE=1 SV=1	Domain of unknown function (DUF296)	[S] LSE0374 A Uncharacterized
CL1029.Contig1_All	K13065//shikimate O-hydroxycinnamoyltransferase [EC:2.3.1.133]+ko01100//Metabolic pathways+ko01110//Biosynthesis of secondary metabolites+ko00940//Phenylpropanoid biosynthesis+ko00941//Flavonoid biosynthesis+ko00945//Stilbenoid, diarylheptanoid and gingerol biosynthesis	PREDICTED: uncharacterized protein LOC108199568 isoform X1 [Daucus carota subsp. sativus]		Protein of unknown function (DUF493)
CL1029.Contig2_All	K13065//shikimate O-hydroxycinnamoyltransferase [EC:2.3.1.133]+ko01100//Metabolic pathways+ko01110//Biosynthesis of secondary metabolites+ko00940//Phenylpropanoid biosynthesis+ko00941//Flavonoid biosynthesis+ko00945//Stilbenoid, diarylheptanoid and gingerol biosynthesis	PREDICTED: uncharacterized protein LOC108199568 isoform X2 [Daucus carota subsp. sativus]		Protein of unknown function (DUF493)
CL1029.Contig3_All	K13065//shikimate O-hydroxycinnamoyltransferase [EC:2.3.1.133]+ko01100//Metabolic pathways+ko01110//Biosynthesis of secondary metabolites+ko00940//Phenylpropanoid biosynthesis+ko00941//Flavonoid biosynthesis+ko00945//Stilbenoid, diarylheptanoid and gingerol biosynthesis	PREDICTED: uncharacterized protein LOC108199568 isoform X1 [Daucus carota subsp. sativus]		Protein of unknown function (DUF493)
CL10290.Contig1_All	K17710//pentatricopeptide repeat domain-containing protein 1	PREDICTED: pentatricopeptide repeat-containing protein At5g46580, chloroplastic-like [Daucus carota subsp. sativus]	Pentatricopeptide repeat-containing protein At5g46580, chloroplastic OS=Arabidopsis thaliana GN=At5g46580 PE=2 SV=1	PPR repeat family	[R] KOG4197 FOG: PPR repeat
CL10290.Contig2_All	K17710//pentatricopeptide repeat domain-containing protein 1	PREDICTED: pentatricopeptide repeat-containing protein At5g46580, chloroplastic-like [Daucus carota subsp. sativus]	Pentatricopeptide repeat-containing protein At5g46580, chloroplastic OS=Arabidopsis thaliana GN=At5g46580 PE=2 SV=1	PPR repeat family	[R] KOG4197 FOG: PPR repeat
CL10290.Contig3_All	K18195//rhamnogalacturonan endolyase [EC:4.2.2.23]	PREDICTED: uncharacterized protein LOC108226171 [Daucus carota subsp. sativus]		zinc-binding in reverse transcriptase	[R] KOG1075 FOG: Reverse transcriptase
CL10290.Contig4_All	K18195//rhamnogalacturonan endolyase [EC:4.2.2.23]	PREDICTED: uncharacterized protein LOC108203992, partial [Daucus carota subsp. sativus]		zinc-binding in reverse transcriptase	[R] KOG1075 FOG: Reverse transcriptase
CL10290.Contig5_All	K18195//rhamnogalacturonan endolyase [EC:4.2.2.23]	PREDICTED: uncharacterized protein LOC108203992, partial [Daucus carota subsp. sativus]		zinc-binding in reverse transcriptase	[R] KOG1075 FOG: Reverse transcriptase
CL10291.Contig1_All	K04733//interleukin-1 receptor-associated kinase 4 [EC:2.7.11.1]	PREDICTED: putative receptor protein kinase ZmPK1 [Daucus carota subsp. sativus] >KZM83804.1 hypothetical protein DCAR_028774 [Daucus carota subsp. sativus]	G-type lectin S-receptor-like serine/threonine-protein kinase At2g19130 OS=Arabidopsis thaliana GN=At2g19130 PE=2 SV=1	Protein kinase domain	[T] LSE0015 A Receptor-like protein kinase, contains lectin domains
CL10291.Contig2_All	K04733//interleukin-1 receptor-associated kinase 4 [EC:2.7.11.1]	PREDICTED: putative receptor protein kinase ZmPK1 [Daucus carota subsp. sativus] >KZM83804.1 hypothetical protein DCAR_028774 [Daucus carota subsp. sativus]	G-type lectin S-receptor-like serine/threonine-protein kinase At2g19130 OS=Arabidopsis thaliana GN=At2g19130 PE=2 SV=1	Protein kinase domain	[T] LSE0015 A Receptor-like protein kinase, contains lectin domains
CL10291.Contig3_All	K04733//interleukin-1 receptor-associated kinase 4 [EC:2.7.11.1]	PREDICTED: putative receptor protein kinase ZmPK1 [Daucus carota subsp. sativus] >KZM83804.1 hypothetical protein DCAR_028774 [Daucus carota subsp. sativus]	G-type lectin S-receptor-like serine/threonine-protein kinase At2g19130 OS=Arabidopsis thaliana GN=At2g19130 PE=2 SV=1	Protein kinase domain	[T] LSE0015 A Receptor-like protein kinase, contains lectin domains
CL10291.Contig4_All	K04733//interleukin-1 receptor-associated kinase 4 [EC:2.7.11.1]	PREDICTED: putative receptor protein kinase ZmPK1 [Daucus carota subsp. sativus] >KZM83804.1 hypothetical protein DCAR_028774 [Daucus carota subsp. sativus]	Receptor-like serine/threonine-protein kinase SD1-8 OS=Arabidopsis thaliana GN=SD18 PE=1 SV=1	D-mannose binding lectin	[T] LSE0015 A Receptor-like protein kinase, contains lectin domains
CL10292.Contig1_All	K13425//WRKY transcription factor 22+ko04016//MAPK signaling pathway - plant+ko04626//Plant-pathogen interaction	PREDICTED: WRKY transcription factor 22 [Daucus carota subsp. sativus]	Probable WRKY transcription factor 29 OS=Arabidopsis thaliana GN=WRKY29 PE=2 SV=1	WRKY DNA -binding domain	[KT] LSE0036 A WRKY superfamily transcription factors
CL10292.Contig2_All	K13425//WRKY transcription factor 22+ko04016//MAPK signaling pathway - plant+ko04626//Plant-pathogen interaction	hypothetical protein DCAR_004610 [Daucus carota subsp. sativus]	Probable WRKY transcription factor 27 OS=Arabidopsis thaliana GN=WRKY27 PE=2 SV=1	WRKY DNA -binding domain	[KT] LSE0036 A WRKY superfamily transcription factors
CL10292.Contig3_All	K13425//WRKY transcription factor 22+ko04016//MAPK signaling pathway - plant+ko04626//Plant-pathogen interaction	hypothetical protein DCAR_004610 [Daucus carota subsp. sativus]	WRKY transcription factor 22 OS=Arabidopsis thaliana GN=WRKY22 PE=2 SV=1	WRKY DNA -binding domain	[KT] LSE0036 A WRKY superfamily transcription factors
CL10292.Contig4_All	K13425//WRKY transcription factor 22+ko04016//MAPK signaling pathway - plant+ko04626//Plant-pathogen interaction	PREDICTED: probable WRKY transcription factor 29 [Daucus carota subsp. sativus]	Probable WRKY transcription factor 35 OS=Arabidopsis thaliana GN=WRKY35 PE=2 SV=1	WRKY DNA -binding domain	[KT] LSE0036 A WRKY superfamily transcription factors
CL10293.Contig1_All	K22686//pro-apoptotic serine protease NMA111 [EC:3.4.21.-];K12447//UDP-sugar pyrophosphorylase [EC:2.7.7.64]+ko00520//Amino sugar and nucleotide sugar metabolism+ko00040//Pentose and glucuronate interconversions+ko01100//Metabolic pathways+ko00052//Galactose metabolism+ko00053//Ascorbate and aldarate metabolism	uncharacterized protein LOC110781333 [Spinacia oleracea]	Uncharacterized mitochondrial protein AtMg00240 OS=Arabidopsis thaliana GN=AtMg00240 PE=4 SV=1	Reverse transcriptase (RNA-dependent DNA polymerase)	[R] KOG0017 FOG: Transposon-encoded proteins with TYA, reverse transcriptase, integrase domains in various combinations
CL10293.Contig2_All	K22686//pro-apoptotic serine protease NMA111 [EC:3.4.21.-]	uncharacterized protein LOC110781333 [Spinacia oleracea]	Uncharacterized mitochondrial protein AtMg00240 OS=Arabidopsis thaliana GN=AtMg00240 PE=4 SV=1	Reverse transcriptase (RNA-dependent DNA polymerase)	[R] KOG0017 FOG: Transposon-encoded proteins with TYA, reverse transcriptase, integrase domains in various combinations
CL10294.Contig1_All
CL10294.Contig2_All
CL10294.Contig3_All
CL10295.Contig1_All		PREDICTED: uncharacterized protein LOC108206654 [Daucus carota subsp. sativus] >KZN06898.1 hypothetical protein DCAR_007735 [Daucus carota subsp. sativus]		Domain of unknown function (DUF4598)	[S] KOG2592 Tumor differentially expressed (TDE) protein
CL10296.Contig1_All	K09419//heat shock transcription factor, other eukaryote	PREDICTED: heat stress transcription factor A-4b-like [Daucus carota subsp. sativus]	Heat stress transcription factor A-4c OS=Arabidopsis thaliana GN=HSFA4C PE=2 SV=1	HSF-type DNA-binding	[K] KOG0627 Heat shock transcription factor
CL10296.Contig2_All	K09419//heat shock transcription factor, other eukaryote	PREDICTED: heat stress transcription factor A-4b-like [Daucus carota subsp. sativus]	Heat stress transcription factor A-4c OS=Arabidopsis thaliana GN=HSFA4C PE=2 SV=1	Sirohaem synthase dimerisation region	[K] KOG0627 Heat shock transcription factor
CL10297.Contig1_All	K17964//leucine-rich PPR motif-containing protein, mitochondrial	PREDICTED: pentatricopeptide repeat-containing protein At3g22670, mitochondrial-like [Daucus carota subsp. sativus] >XP_017225674.1 PREDICTED: pentatricopeptide repeat-containing protein At3g22670, mitochondrial-like [Daucus carota subsp. sativus] >KZM83107.1 hypothetical protein DCAR_030676 [Daucus carota subsp. sativus]	Pentatricopeptide repeat-containing protein At3g22670, mitochondrial OS=Arabidopsis thaliana GN=At3g22670 PE=2 SV=1	PPR repeat family	[R] KOG4197 FOG: PPR repeat
CL10297.Contig2_All	K17964//leucine-rich PPR motif-containing protein, mitochondrial	PREDICTED: pentatricopeptide repeat-containing protein At3g22670, mitochondrial-like [Daucus carota subsp. sativus] >XP_017225674.1 PREDICTED: pentatricopeptide repeat-containing protein At3g22670, mitochondrial-like [Daucus carota subsp. sativus] >KZM83107.1 hypothetical protein DCAR_030676 [Daucus carota subsp. sativus]	Pentatricopeptide repeat-containing protein At3g22670, mitochondrial OS=Arabidopsis thaliana GN=At3g22670 PE=2 SV=1	PPR repeat family	[R] KOG4197 FOG: PPR repeat
CL10297.Contig3_All	K17964//leucine-rich PPR motif-containing protein, mitochondrial	PREDICTED: pentatricopeptide repeat-containing protein At3g22670, mitochondrial-like [Daucus carota subsp. sativus] >XP_017225674.1 PREDICTED: pentatricopeptide repeat-containing protein At3g22670, mitochondrial-like [Daucus carota subsp. sativus] >KZM83107.1 hypothetical protein DCAR_030676 [Daucus carota subsp. sativus]	Pentatricopeptide repeat-containing protein At3g22670, mitochondrial OS=Arabidopsis thaliana GN=At3g22670 PE=2 SV=1	PPR repeat family	[R] KOG4197 FOG: PPR repeat
CL10298.Contig1_All	K22038//volume-regulated anion channel	PREDICTED: TMV resistance protein N [Daucus carota subsp. sativus]	TMV resistance protein N OS=Nicotiana glutinosa GN=N PE=1 SV=1	NB-ARC domain	[VT] LSE0039 A Disease resistance protein (TIR-NBS-LRR class)
CL10298.Contig2_All	K22038//volume-regulated anion channel	PREDICTED: TMV resistance protein N [Daucus carota subsp. sativus]	TMV resistance protein N OS=Nicotiana glutinosa GN=N PE=1 SV=1	NB-ARC domain	[VT] LSE0039 A Disease resistance protein (TIR-NBS-LRR class)
CL10299.Contig1_All	K22484//transcriptional regulator CBF1	PREDICTED: transcription factor bHLH30 isoform X1 [Daucus carota subsp. sativus] >XP_017224426.1 PREDICTED: transcription factor bHLH30 isoform X1 [Daucus carota subsp. sativus] >KZM82517.1 hypothetical protein DCAR_030086 [Daucus carota subsp. sativus]	Transcription factor bHLH30 OS=Arabidopsis thaliana GN=BHLH30 PE=1 SV=1	Helix-loop-helix DNA-binding domain	[KT] LSE0107 A bHLH transcription factor
CL10299.Contig2_All	K22484//transcriptional regulator CBF1	PREDICTED: transcription factor bHLH30-like [Daucus carota subsp. sativus] >KZN06387.1 hypothetical protein DCAR_007224 [Daucus carota subsp. sativus]	Transcription factor bHLH30 OS=Arabidopsis thaliana GN=BHLH30 PE=1 SV=1	Helix-loop-helix DNA-binding domain	[KT] LSE0107 A bHLH transcription factor
CL10299.Contig3_All	K22484//transcriptional regulator CBF1	PREDICTED: transcription factor bHLH30-like [Daucus carota subsp. sativus] >KZN06387.1 hypothetical protein DCAR_007224 [Daucus carota subsp. sativus]	Transcription factor bHLH30 OS=Arabidopsis thaliana GN=BHLH30 PE=1 SV=1	Helix-loop-helix DNA-binding domain	[KT] LSE0107 A bHLH transcription factor
CL103.Contig10_All	K00993//ethanolaminephosphotransferase [EC:2.7.8.1]+ko00440//Phosphonate and phosphinate metabolism+ko01100//Metabolic pathways+ko01110//Biosynthesis of secondary metabolites+ko00564//Glycerophospholipid metabolism+ko00565//Ether lipid metabolism	PREDICTED: choline/ethanolaminephosphotransferase 1-like isoform X1 [Daucus carota subsp. sativus]	Choline/ethanolaminephosphotransferase 1 OS=Arabidopsis thaliana GN=AAPT1 PE=1 SV=1	Positive regulator of sigma(E), RseC/MucC	[I] KOG2877 sn-1,2-diacylglycerol ethanolamine- and cholinephosphotranferases
CL103.Contig11_All	K00993//ethanolaminephosphotransferase [EC:2.7.8.1]+ko00440//Phosphonate and phosphinate metabolism+ko01100//Metabolic pathways+ko01110//Biosynthesis of secondary metabolites+ko00564//Glycerophospholipid metabolism+ko00565//Ether lipid metabolism	aminoalcoholphosphotransferase [Spuriopimpinella brachycarpa]	Choline/ethanolaminephosphotransferase 1 OS=Arabidopsis thaliana GN=AAPT1 PE=1 SV=1	CDP-alcohol phosphatidyltransferase	[I] KOG2877 sn-1,2-diacylglycerol ethanolamine- and cholinephosphotranferases
CL103.Contig12_All	K00993//ethanolaminephosphotransferase [EC:2.7.8.1]+ko00440//Phosphonate and phosphinate metabolism+ko01100//Metabolic pathways+ko01110//Biosynthesis of secondary metabolites+ko00564//Glycerophospholipid metabolism+ko00565//Ether lipid metabolism	Choline/ethanolaminephosphotransferase 1 [Dichanthelium oligosanthes]	Choline/ethanolaminephosphotransferase 2 OS=Arabidopsis thaliana GN=AAPT2 PE=1 SV=1	Positive regulator of sigma(E), RseC/MucC	[I] KOG2877 sn-1,2-diacylglycerol ethanolamine- and cholinephosphotranferases
CL103.Contig13_All	K00993//ethanolaminephosphotransferase [EC:2.7.8.1]+ko00440//Phosphonate and phosphinate metabolism+ko01100//Metabolic pathways+ko01110//Biosynthesis of secondary metabolites+ko00564//Glycerophospholipid metabolism+ko00565//Ether lipid metabolism	PREDICTED: choline/ethanolaminephosphotransferase 1-like isoform X2 [Daucus carota subsp. sativus]	Choline/ethanolaminephosphotransferase 1 OS=Arabidopsis thaliana GN=AAPT1 PE=1 SV=1		[I] KOG2877 sn-1,2-diacylglycerol ethanolamine- and cholinephosphotranferases
CL103.Contig1_All	K00993//ethanolaminephosphotransferase [EC:2.7.8.1]+ko00440//Phosphonate and phosphinate metabolism+ko01100//Metabolic pathways+ko01110//Biosynthesis of secondary metabolites+ko00564//Glycerophospholipid metabolism+ko00565//Ether lipid metabolism	aminoalcoholphosphotransferase [Spuriopimpinella brachycarpa]	Choline/ethanolaminephosphotransferase 1 OS=Arabidopsis thaliana GN=AAPT1 PE=1 SV=1	CDP-alcohol phosphatidyltransferase	[I] KOG2877 sn-1,2-diacylglycerol ethanolamine- and cholinephosphotranferases
CL103.Contig2_All	K00993//ethanolaminephosphotransferase [EC:2.7.8.1]+ko00440//Phosphonate and phosphinate metabolism+ko01100//Metabolic pathways+ko01110//Biosynthesis of secondary metabolites+ko00564//Glycerophospholipid metabolism+ko00565//Ether lipid metabolism	PREDICTED: choline/ethanolaminephosphotransferase 1-like isoform X1 [Daucus carota subsp. sativus]	Choline/ethanolaminephosphotransferase 1 OS=Arabidopsis thaliana GN=AAPT1 PE=1 SV=1	CDP-alcohol phosphatidyltransferase	[I] KOG2877 sn-1,2-diacylglycerol ethanolamine- and cholinephosphotranferases
CL103.Contig3_All	K00993//ethanolaminephosphotransferase [EC:2.7.8.1]+ko00440//Phosphonate and phosphinate metabolism+ko01100//Metabolic pathways+ko01110//Biosynthesis of secondary metabolites+ko00564//Glycerophospholipid metabolism+ko00565//Ether lipid metabolism	PREDICTED: choline/ethanolaminephosphotransferase 1-like isoform X2 [Daucus carota subsp. sativus]	Choline/ethanolaminephosphotransferase 1 OS=Arabidopsis thaliana GN=AAPT1 PE=1 SV=1		[I] KOG2877 sn-1,2-diacylglycerol ethanolamine- and cholinephosphotranferases
CL103.Contig4_All	K00993//ethanolaminephosphotransferase [EC:2.7.8.1]+ko00440//Phosphonate and phosphinate metabolism+ko01100//Metabolic pathways+ko01110//Biosynthesis of secondary metabolites+ko00564//Glycerophospholipid metabolism+ko00565//Ether lipid metabolism	PREDICTED: choline/ethanolaminephosphotransferase 1-like isoform X2 [Daucus carota subsp. sativus]	Choline/ethanolaminephosphotransferase 1 OS=Arabidopsis thaliana GN=AAPT1 PE=1 SV=1		[I] KOG2877 sn-1,2-diacylglycerol ethanolamine- and cholinephosphotranferases
CL103.Contig5_All
CL103.Contig6_All	K00993//ethanolaminephosphotransferase [EC:2.7.8.1]+ko00440//Phosphonate and phosphinate metabolism+ko01100//Metabolic pathways+ko01110//Biosynthesis of secondary metabolites+ko00564//Glycerophospholipid metabolism+ko00565//Ether lipid metabolism	PREDICTED: choline/ethanolaminephosphotransferase 1-like isoform X2 [Daucus carota subsp. sativus]	Choline/ethanolaminephosphotransferase 1 OS=Arabidopsis thaliana GN=AAPT1 PE=1 SV=1		[I] KOG2877 sn-1,2-diacylglycerol ethanolamine- and cholinephosphotranferases
CL103.Contig7_All	K00993//ethanolaminephosphotransferase [EC:2.7.8.1]+ko00440//Phosphonate and phosphinate metabolism+ko01100//Metabolic pathways+ko01110//Biosynthesis of secondary metabolites+ko00564//Glycerophospholipid metabolism+ko00565//Ether lipid metabolism	PREDICTED: choline/ethanolaminephosphotransferase 1-like isoform X1 [Daucus carota subsp. sativus]	Choline/ethanolaminephosphotransferase 1 OS=Arabidopsis thaliana GN=AAPT1 PE=1 SV=1		[I] KOG2877 sn-1,2-diacylglycerol ethanolamine- and cholinephosphotranferases
CL103.Contig8_All	K00993//ethanolaminephosphotransferase [EC:2.7.8.1]+ko00440//Phosphonate and phosphinate metabolism+ko01100//Metabolic pathways+ko01110//Biosynthesis of secondary metabolites+ko00564//Glycerophospholipid metabolism+ko00565//Ether lipid metabolism	PREDICTED: choline/ethanolaminephosphotransferase 1-like isoform X2 [Daucus carota subsp. sativus]	Choline/ethanolaminephosphotransferase 1 OS=Arabidopsis thaliana GN=AAPT1 PE=1 SV=1		[I] KOG2877 sn-1,2-diacylglycerol ethanolamine- and cholinephosphotranferases
CL103.Contig9_All	K00993//ethanolaminephosphotransferase [EC:2.7.8.1]+ko00440//Phosphonate and phosphinate metabolism+ko01100//Metabolic pathways+ko01110//Biosynthesis of secondary metabolites+ko00564//Glycerophospholipid metabolism+ko00565//Ether lipid metabolism	aminoalcoholphosphotransferase [Spuriopimpinella brachycarpa]	Choline/ethanolaminephosphotransferase 1 OS=Arabidopsis thaliana GN=AAPT1 PE=1 SV=1	CDP-alcohol phosphatidyltransferase	[I] KOG2877 sn-1,2-diacylglycerol ethanolamine- and cholinephosphotranferases
CL1030.Contig10_All	K05681//ATP-binding cassette, subfamily G (WHITE), member 2+ko02010//ABC transporters	PREDICTED: ABC transporter G family member 32-like [Daucus carota subsp. sativus] >KZN01647.1 hypothetical protein DCAR_010401 [Daucus carota subsp. sativus]	ABC transporter G family member 32 OS=Arabidopsis thaliana GN=ABCG32 PE=1 SV=1	ABC-2 type transporter	[Q] KOG0065 Pleiotropic drug resistance proteins (PDR1-15), ABC superfamily
CL1030.Contig11_All	K21396//ATP-binding cassette, subfamily G (WHITE), eye pigment precursor transporter;K05681//ATP-binding cassette, subfamily G (WHITE), member 2+ko02010//ABC transporters	PREDICTED: ABC transporter G family member 32-like [Daucus carota subsp. sativus] >KZN01647.1 hypothetical protein DCAR_010401 [Daucus carota subsp. sativus]	ABC transporter G family member 32 OS=Arabidopsis thaliana GN=ABCG32 PE=1 SV=1	ABC-2 type transporter	[Q] KOG0065 Pleiotropic drug resistance proteins (PDR1-15), ABC superfamily
CL1030.Contig12_All	K21396//ATP-binding cassette, subfamily G (WHITE), eye pigment precursor transporter;K05681//ATP-binding cassette, subfamily G (WHITE), member 2+ko02010//ABC transporters	PREDICTED: ABC transporter G family member 32-like [Daucus carota subsp. sativus] >KZN01647.1 hypothetical protein DCAR_010401 [Daucus carota subsp. sativus]	ABC transporter G family member 32 OS=Arabidopsis thaliana GN=ABCG32 PE=1 SV=1	ABC-2 type transporter	[Q] KOG0065 Pleiotropic drug resistance proteins (PDR1-15), ABC superfamily
CL1030.Contig13_All		PREDICTED: ABC transporter G family member 32-like [Daucus carota subsp. sativus] >KZN01647.1 hypothetical protein DCAR_010401 [Daucus carota subsp. sativus]	ABC transporter G family member 36 OS=Oryza sativa subsp. indica GN=ABCG36 PE=2 SV=1		[Q] KOG0065 Pleiotropic drug resistance proteins (PDR1-15), ABC superfamily
CL1030.Contig1_All	K05681//ATP-binding cassette, subfamily G (WHITE), member 2+ko02010//ABC transporters	PREDICTED: ABC transporter G family member 32-like [Daucus carota subsp. sativus] >KZN01647.1 hypothetical protein DCAR_010401 [Daucus carota subsp. sativus]	ABC transporter G family member 32 OS=Arabidopsis thaliana GN=ABCG32 PE=1 SV=1	ABC-transporter extracellular N-terminal	[Q] KOG0065 Pleiotropic drug resistance proteins (PDR1-15), ABC superfamily
CL1030.Contig2_All	K05681//ATP-binding cassette, subfamily G (WHITE), member 2+ko02010//ABC transporters	PREDICTED: ABC transporter G family member 32-like [Daucus carota subsp. sativus] >KZN01647.1 hypothetical protein DCAR_010401 [Daucus carota subsp. sativus]	ABC transporter G family member 32 OS=Arabidopsis thaliana GN=ABCG32 PE=1 SV=1	ABC-2 type transporter	[Q] KOG0065 Pleiotropic drug resistance proteins (PDR1-15), ABC superfamily
[truncated: 118,043 more rows]
