# Supplementary material for: De novo transcriptome analysis of Cnidium monnieri (L.) Cuss and detection of genes related to coumarin biosynthesis
Source: PeerJ. 2020 Nov 6;8:e10157. doi: 10.7717/peerj.10157 (PMC7651471; doi:10.7717/peerj.10157)
Supplement: Supplemental Information S1 [file peerj-08-10157-s018.xlsx]

## Sheet: Sheet1
Table S1. RNA information for different tissues.
Sample	Concentration (ng/μL)	Total amount (μg)	OD260/280	RIN	28S/18S
Leaves	867	34.68	1.99	6.3	1.5
Roots	486	19.44	1.89	8.1	1.4
Stemes	699	13.98	2.04	7.2	1.5
Flowers	995	39.8	1.99	8.4	1.4
Table S2. Gene descriptions and primers used for qRT-PCR.
Gene	Primer Sequences (5' to 3')	Size (bp)	Annealing (℃)
CL2358.Contig9	TGTGGCAACTGTCATGGCATCC	155	58
	GAGGCGGCGATGTCATCTTGTC
Unigene 20867	ATTCCTGCAACTGGCCTCAACAC	140	59
	CCAGGAAGCCATGCAGCTACAAG
CL11351.Contig3	ATCTCCTCAGTGGCTTGGTCCTC	131	61
	TGCCACCGTGAATAGCCTTGTTC
CL16061.Contig1	TGCGTGCGGAACTGTTGTAAGG	179	58
	TGTGCAACCAGCCTTCTTCGTC
CL3766.Contig1	GCCTATCCTCGGTATCACAATC	98	60
	GTCCTCCTTTCTCTGCTGTATC
CL8379.Contig6	AGCACTGTGTTGCAGCCAATGG	112	58
	TCTCCGTTCTTGAGCACCTCTGG
β-actin	TGCCATTCTGCGTCTTGACCTTG	99	59
	CGCTCAGCAGTGGTGGTGAAC
Table S3. Quality evaluation of clean data.
Sample	Total Raw Reads (M)	Total Clean Reads (M)	Total Clean Bases (Gb)	Clean Reads Q30 (%)	Clean Reads Ratio (%)
Flower	84.27	72.09	10.81	85.73	85.55
Leaf	83.42	70.68	10.6	85.56	84.73
Root	82.14	69.23	10.38	85.43	84.29
Stem	81.65	69.79	10.47	85.94	85.48
Table S4. Qualitative unigene index.
Sample	Total Number	Total Length	Mean Length	N50	GC(%)
Flower	118107	135336530	1145	1862	39.03
Leaf	103283	109603336	1061	1730	38.47
Root	88393	102361920	1158	1878	39.76
Stem	101102	118742547	1174	1897	38.69
All-Unigene	173938	221412227	1272	2121	38.79
Table S5. KEGG annotation of all unigenes.
Pathway	Unigene number	Pathway ID
Metabolic pathways	18749 (21.66%)	ko01100
Biosynthesis of secondary metabolites	10102 (11.67%)	ko01110
Carbon metabolism	2514 (2.9%)	ko01200
Ribosome	2379 (2.75%)	ko03010
RNA transport	2330 (2.69%)	ko03013
Plant hormone signal transduction	2255 (2.6%)	ko04075
Spliceosome	2250 (2.6%)	ko03040
Protein processing in endoplasmic reticulum	2211 (2.55%)	ko04141
Biosynthesis of amino acids	2168 (2.5%)	ko01230
Plant-pathogen interaction	2126 (2.46%)	ko04626
MAPK signaling pathway - plant	1899 (2.19%)	ko04016
Endocytosis	1891 (2.18%)	ko04144
Purine metabolism	1869 (2.16%)	ko00230
Starch and sucrose metabolism	1843 (2.13%)	ko00500
mRNA surveillance pathway	1592 (1.84%)	ko03015
Phenylpropanoid biosynthesis	1575 (1.82%)	ko00940
Pyrimidine metabolism	1561 (1.8%)	ko00240
Amino sugar and nucleotide sugar metabolism	1494 (1.73%)	ko00520
RNA degradation	1440 (1.66%)	ko03018
Glycolysis / Gluconeogenesis	1290 (1.49%)	ko00010
Pentose and glucuronate interconversions	1284 (1.48%)	ko00040
Ubiquitin mediated proteolysis	1198 (1.38%)	ko04120
Galactose metabolism	1091 (1.26%)	ko00052
Oxidative phosphorylation	1020 (1.18%)	ko00190
Peroxisome	948 (1.1%)	ko04146
Glycerophospholipid metabolism	898 (1.04%)	ko00564
Ribosome biogenesis in eukaryotes	895 (1.03%)	ko03008
Pyruvate metabolism	877 (1.01%)	ko00620
Cysteine and methionine metabolism	876 (1.01%)	ko00270
ABC transporters	862 (1%)	ko02010
Glycerolipid metabolism	861 (0.99%)	ko00561
Ascorbate and aldarate metabolism	844 (0.97%)	ko00053
RNA polymerase	831 (0.96%)	ko03020
Phosphatidylinositol signaling system	815 (0.94%)	ko04070
Glyoxylate and dicarboxylate metabolism	810 (0.94%)	ko00630
Homologous recombination	804 (0.93%)	ko03440
Nucleotide excision repair	802 (0.93%)	ko03420
Fatty acid metabolism	802 (0.93%)	ko01212
Carbon fixation in photosynthetic organisms	783 (0.9%)	ko00710
Inositol phosphate metabolism	753 (0.87%)	ko00562
Sphingolipid metabolism	732 (0.85%)	ko00600
Cyanoamino acid metabolism	707 (0.82%)	ko00460
Phagosome	698 (0.81%)	ko04145
Glutathione metabolism	694 (0.8%)	ko00480
DNA replication	691 (0.8%)	ko03030
Circadian rhythm - plant	661 (0.76%)	ko04712
Fatty acid degradation	661 (0.76%)	ko00071
Aminoacyl-tRNA biosynthesis	653 (0.75%)	ko00970
Fructose and mannose metabolism	637 (0.74%)	ko00051
Other glycan degradation	625 (0.72%)	ko00511
alpha-Linolenic acid metabolism	602 (0.7%)	ko00592
Valine, leucine and isoleucine degradation	600 (0.69%)	ko00280
Mismatch repair	598 (0.69%)	ko03430
Citrate cycle (TCA cycle)	593 (0.69%)	ko00020
Pentose phosphate pathway	556 (0.64%)	ko00030
2-Oxocarboxylic acid metabolism	556 (0.64%)	ko01210
Glycine, serine and threonine metabolism	553 (0.64%)	ko00260
Arginine and proline metabolism	503 (0.58%)	ko00330
Alanine, aspartate and glutamate metabolism	493 (0.57%)	ko00250
Proteasome	487 (0.56%)	ko03050
Phenylalanine metabolism	485 (0.56%)	ko00360
Lysine degradation	455 (0.53%)	ko00310
Biosynthesis of unsaturated fatty acids	439 (0.51%)	ko01040
Base excision repair	434 (0.5%)	ko03410
Tryptophan metabolism	432 (0.5%)	ko00380
Flavonoid biosynthesis	420 (0.49%)	ko00941
Tyrosine metabolism	420 (0.49%)	ko00350
Carotenoid biosynthesis	420 (0.49%)	ko00906
Basal transcription factors	415 (0.48%)	ko03022
N-Glycan biosynthesis	407 (0.47%)	ko00510
Porphyrin and chlorophyll metabolism	401 (0.46%)	ko00860
Ubiquinone and other terpenoid-quinone biosynthesis	401 (0.46%)	ko00130
Protein export	395 (0.46%)	ko03060
Autophagy - other	395 (0.46%)	ko04136
Linoleic acid metabolism	394 (0.46%)	ko00591
Phenylalanine, tyrosine and tryptophan biosynthesis	385 (0.44%)	ko00400
beta-Alanine metabolism	368 (0.43%)	ko00410
Glycosaminoglycan degradation	347 (0.4%)	ko00531
Propanoate metabolism	339 (0.39%)	ko00640
Fatty acid biosynthesis	336 (0.39%)	ko00061
Nicotinate and nicotinamide metabolism	336 (0.39%)	ko00760
Arginine biosynthesis	310 (0.36%)	ko00220
Terpenoid backbone biosynthesis	309 (0.36%)	ko00900
Arachidonic acid metabolism	305 (0.35%)	ko00590
Ether lipid metabolism	303 (0.35%)	ko00565
Photosynthesis	299 (0.35%)	ko00195
Tropane, piperidine and pyridine alkaloid biosynthesis	286 (0.33%)	ko00960
Nitrogen metabolism	284 (0.33%)	ko00910
Glycosphingolipid biosynthesis - ganglio series	279 (0.32%)	ko00604
Pantothenate and CoA biosynthesis	279 (0.32%)	ko00770
Indole alkaloid biosynthesis	267 (0.31%)	ko00901
Isoquinoline alkaloid biosynthesis	256 (0.3%)	ko00950
Selenocompound metabolism	255 (0.29%)	ko00450
Cutin, suberine and wax biosynthesis	255 (0.29%)	ko00073
Glycosylphosphatidylinositol (GPI)-anchor biosynthesis	247 (0.29%)	ko00563
Steroid biosynthesis	238 (0.27%)	ko00100
Butanoate metabolism	233 (0.27%)	ko00650
Stilbenoid, diarylheptanoid and gingerol biosynthesis	228 (0.26%)	ko00945
SNARE interactions in vesicular transport	227 (0.26%)	ko04130
Histidine metabolism	216 (0.25%)	ko00340
Riboflavin metabolism	216 (0.25%)	ko00740
One carbon pool by folate	216 (0.25%)	ko00670
Fatty acid elongation	215 (0.25%)	ko00062
Diterpenoid biosynthesis	215 (0.25%)	ko00904
Sulfur metabolism	208 (0.24%)	ko00920
Folate biosynthesis	206 (0.24%)	ko00790
Valine, leucine and isoleucine biosynthesis	197 (0.23%)	ko00290
Sesquiterpenoid and triterpenoid biosynthesis	195 (0.23%)	ko00909
Other types of O-glycan biosynthesis	187 (0.22%)	ko00514
Thiamine metabolism	145 (0.17%)	ko00730
Zeatin biosynthesis	140 (0.16%)	ko00908
Biotin metabolism	134 (0.15%)	ko00780
Betalain biosynthesis	104 (0.12%)	ko00965
C5-Branched dibasic acid metabolism	102 (0.12%)	ko00660
Vitamin B6 metabolism	101 (0.12%)	ko00750
Lysine biosynthesis	95 (0.11%)	ko00300
Monoterpenoid biosynthesis	92 (0.11%)	ko00902
Isoflavonoid biosynthesis	87 (0.1%)	ko00943
Monobactam biosynthesis	84 (0.1%)	ko00261
Brassinosteroid biosynthesis	84 (0.1%)	ko00905
Flavone and flavonol biosynthesis	81 (0.09%)	ko00944
Photosynthesis - antenna proteins	80 (0.09%)	ko00196
Sulfur relay system	76 (0.09%)	ko04122
Taurine and hypotaurine metabolism	67 (0.08%)	ko00430
Non-homologous end-joining	66 (0.08%)	ko03450
Benzoxazinoid biosynthesis	63 (0.07%)	ko00402
Glycosphingolipid biosynthesis - globo and isoglobo series	61 (0.07%)	ko00603
Synthesis and degradation of ketone bodies	61 (0.07%)	ko00072
Phosphonate and phosphinate metabolism	56 (0.06%)	ko00440
Glucosinolate biosynthesis	48 (0.06%)	ko00966
Anthocyanin biosynthesis	37 (0.04%)	ko00942
Lipoic acid metabolism	35 (0.04%)	ko00785
Caffeine metabolism	23 (0.03%)	ko00232
Glycosphingolipid biosynthesis - lacto and neolacto series	15 (0.02%)	ko00601
Mannose type O-glycan biosynthesis	12 (0.01%)	ko00515
Table S6. Significantly enriched pathways for DEGs in flower versus leaf.
Pathway	DEGs with pathway annotation (32060)	P value
Plant hormone signal transduction	998 (3.11%)	6.31505e-13
Plant-pathogen interaction	923 (2.88%)	5.75776e-10
Circadian rhythm - plant	314 (0.98%)	2.18052e-08
Photosynthesis - antenna proteins	54 (0.17%)	3.15515e-08
Indole alkaloid biosynthesis	137 (0.43%)	1.35465e-06
MAPK signaling pathway - plant	796 (2.48%)	5.45911e-06
Linoleic acid metabolism	180 (0.56%)	0.000259605
Anthocyanin biosynthesis	24 (0.07%)	0.000544411
Cutin, suberine and wax biosynthesis	120 (0.37%)	0.000656862
Flavone and flavonol biosynthesis	44 (0.14%)	0.001135
Table S7. Significantly enriched pathways for DEGs in flower versus root.
Pathway	DEGs with pathway annotation (34786)	Pvalue
Biosynthesis of secondary metabolites	4494 (12.92%)	5.11668e-21
Photosynthesis	200 (0.57%)	9.17884e-21
Photosynthesis - antenna proteins	70 (0.2%)	1.97673e-18
Phenylpropanoid biosynthesis	784 (2.25%)	4.9931e-15
Plant hormone signal transduction	1071 (3.08%)	6.25937e-13
Metabolic pathways	7894 (22.69%)	7.70568e-10
Plant-pathogen interaction	990 (2.85%)	9.01187e-10
Carbon fixation in photosynthetic organisms	393 (1.13%)	8.14462e-09
Linoleic acid metabolism	214 (0.62%)	9.69831e-09
Circadian rhythm - plant	337 (0.97%)	1.14078e-08
Table S8. Significantly enriched pathways for DEGs in flower versus stem.
Pathway	DEGs with pathway annotation (27513)	Pvalue
Plant hormone signal transduction	843 (3.06%)	6.35546e-09
Indole alkaloid biosynthesis	121 (0.44%)	2.50476e-06
Glucosinolate biosynthesis	31 (0.11%)	3.08066e-06
Phenylpropanoid biosynthesis	577 (2.1%)	2.06364e-05
Glycerolipid metabolism	330 (1.2%)	2.58406e-05
Starch and sucrose metabolism	665 (2.42%)	4.02976e-05
C5-Branched dibasic acid metabolism	52 (0.19%)	4.36069e-05
Plant-pathogen interaction	759 (2.76%)	5.44573e-05
Circadian rhythm - plant	256 (0.93%)	8.84346e-05
MAPK signaling pathway - plant	671 (2.44%)	0.000467164
Table S9. Summary of up-regulated flower-specific DEGs involved in coumarin biosynthesis.
Enzyme	Gene ID
BGA	CL104.Contig2, CL104.Contig5, CL104.Contig6, CL10943.Contig12, CL111.Contig1, CL111.Contig3, CL11566.Contig1, CL12235.Contig23, CL12235.Contig9, CL13316.Contig2, CL13316.Contig3, CL13316.Contig4, CL13316.Contig5, CL14515.Contig2, CL14852.Contig1, CL1526.Contig3, CL15937.Contig2, CL16564.Contig5, CL1900.Contig2, CL2358.Contig3, CL2358.Contig6, CL2724.Contig2, CL2958.Contig1, CL2958.Contig2, CL3259…
F6H1	CL12213.Contig1, CL12213.Contig2, CL14800.Contig1, Unigene64615, CL2264.Contig1, CL2264.Contig4, Unigene61656, Unigene6497
HCT	CL11042.Contig1, CL11427.Contig1, CL11427.Contig2, CL14156.Contig1, CL15145.Contig5, CL4902.Contig10, Unigene2122, Unigene62447, Unigene69413, Unigene74030, Unigene74232, Unigene74233, Unigene78756
COMT	CL6724.Contig1, Unigene17846, Unigene60853, Unigene60854, Unigene60958, Unigene60960, Unigene68303
4CL	CL16506.Contig1, CL2473.Contig4
Table S10. TFs invovled in phenylpropanoid biosynthesis in C. monnieri.
Gene	TFs	Pathway
Unigene17715	HRT	Biosynthesis of secondary metabolites
		Phenylpropanoid biosynthesis
		Metabolic pathways
CL6053.Contig4	MYB	Biosynthesis of secondary metabolites
		Phenylpropanoid biosynthesis
		Metabolic pathways
CL1088.Contig1	MYB	Phenylpropanoid biosynthesis
		Biosynthesis of secondary metabolites
		Metabolic pathways
Unigene53702	MYB	Metabolic pathways
		Biosynthesis of secondary metabolites
		Phenylpropanoid biosynthesis
CL6053.Contig5	MYB	Biosynthesis of secondary metabolites
		Phenylpropanoid biosynthesis
		Metabolic pathways
CL6053.Contig7	MYB	Phenylpropanoid biosynthesis
		Biosynthesis of secondary metabolites
		Metabolic pathways
CL6967.Contig2	MYB	Phenylpropanoid biosynthesis
		Metabolic pathways
		Biosynthesis of secondary metabolites
CL6053.Contig3	MYB	Metabolic pathways
		Phenylpropanoid biosynthesis
		Biosynthesis of secondary metabolites
CL6967.Contig7	MYB	Metabolic pathways
		Phenylpropanoid biosynthesis
		Biosynthesis of secondary metabolites
CL6967.Contig8	MYB	Biosynthesis of secondary metabolites
		Metabolic pathways
		Phenylpropanoid biosynthesis
Unigene13792	MYB	Phenylpropanoid biosynthesis
		Metabolic pathways
		Biosynthesis of secondary metabolites
CL6053.Contig6	MYB	Metabolic pathways
		Phenylpropanoid biosynthesis
		Biosynthesis of secondary metabolites
CL9233.Contig1	GRAS	Metabolic pathways
		Phenylpropanoid biosynthesis
		Biosynthesis of secondary metabolites
CL9233.Contig2	GRAS	Metabolic pathways
		Phenylpropanoid biosynthesis
		Biosynthesis of secondary metabolites
CL9233.Contig3	GRAS	Metabolic pathways
		Phenylpropanoid biosynthesis
		Biosynthesis of secondary metabolites
